# Supplementary material for: Integrated Analyses of m6A Regulator-Mediated Methylation Modification Patterns and Tumor Microenvironment Infiltration Characterization in Pan-Cancer
Source: MDPI journal article supplement (doi:10.3390/ijms231911182), 2022-09-23
Supplement: s1 [file s1]

## **Supplementary Materials for**

# **“Integrated analyses of m<sup>6</sup>A regulator-mediated methylation modification patterns and tumor microenvironment infiltration characterization in pan-cancer”**

**Qingkang Cao<sup>1</sup>, Yuanyuan Chen<sup>1,\*</sup>**

<sup>1</sup> Department of Mathematics, College of Science, Nanjing Agricultural University, Nanjing 210095, China.

\* Correspondence: [chenyuanyuan@njau.edu.cn](mailto:chenyuanyuan@njau.edu.cn)

## **Overview of Supplementary Materials:**

### **Supplementary Figures**

Supplementary Figure S1: Kaplan-Meier curves of patients in the low-RBM15 group and the high-RBM15 group in pan-cancer.

Supplementary Figure S2: Unsupervised clustering based on 20 m<sup>6</sup>A regulators. The consensus fraction matrix of all samples when k=2.

Supplementary Figure S3: Functional annotation for m<sup>6</sup>A phenotype-related using KEGG enrichment analysis.

Supplementary Figure S4: Unsupervised clustering based on 37 m<sup>6</sup>A phenotype-related genes. The consensus fraction matrix of all samples when k=2.

### **Supplementary Tables**

Supplementary Table S1: Spearman correlation analysis of the 20 m<sup>6</sup>A modification regulators.

Supplementary Table S2: Samples clustering in pan-cancer.

Supplementary Table S3: Enrichment score of KEGG pathways in pan-cancer.

Supplementary Table S4: TME infiltration characteristics of samples in pan-cancer.

Supplementary Table S5: The correlation of m<sup>6</sup>A modification regulators and TME infiltration Characteristics.

Supplementary Table S6: The Univariate Cox regression analysis of 40 differential genes.

Supplementary Table S7: Functional annotation for m<sup>6</sup>A phenotype-related genes.

Supplementary Table S8: Gene signatures used in this study for marking biological processes.

Supplementary Table S9: The gene sets used in this work for marking 28 types immune infiltration cells.

### **Supplementary Figures**

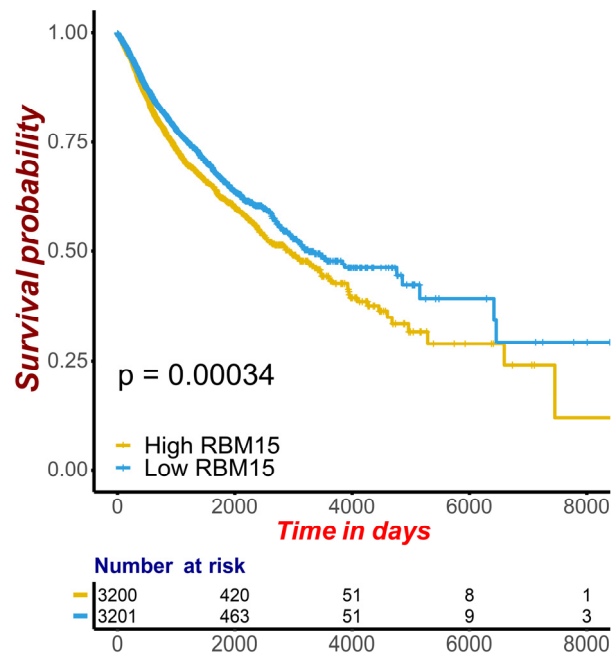

**Figure S1.** Kaplan-Meier curves of patients in the low-RBM15 group and the high- RBM15 group in pan-cancer. The X-axis shows survival time in days. The Y-axis shows the overall survival rate.

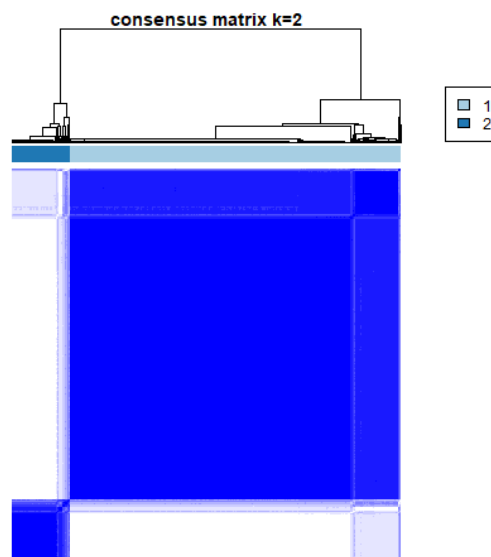

**Figure S2.** Unsupervised clustering based on 20 m<sup>6</sup>A regulators. The consensus fraction matrix of all samples when k=2.

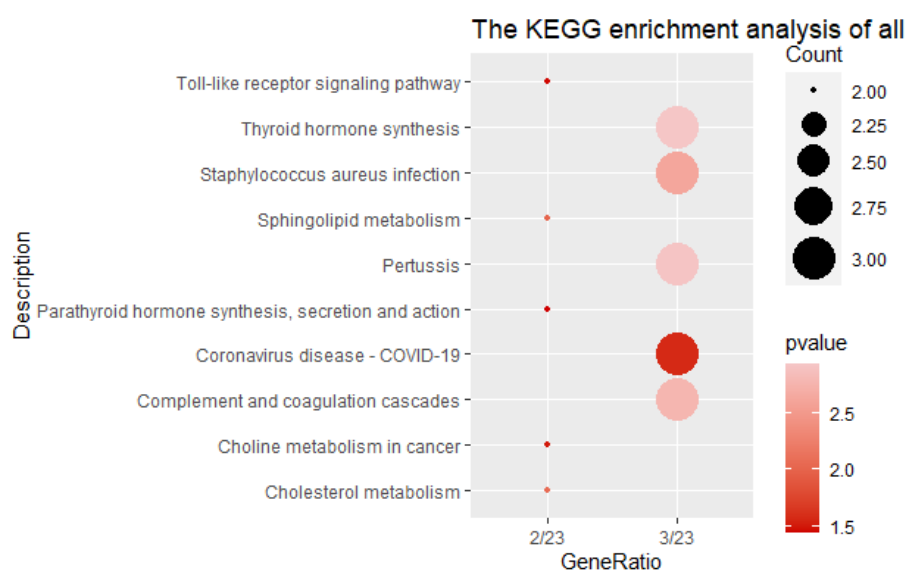

**Figure S3.** Functional annotation for m<sup>6</sup>A phenotype-related genes using KEGG enrichment analysis.

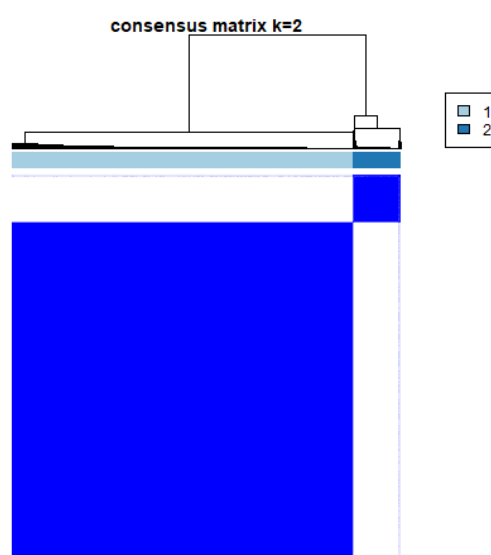

**Figure S4.** Unsupervised clustering based on 37 m<sup>6</sup>A phenotype-related genes. The consensus fraction matrix of all samples when k=2.
