# Supplementary material for: Integrated Analyses of m6A Regulator-Mediated Methylation Modification Patterns and Tumor Microenvironment Infiltration Characterization in Pan-Cancer
Source: Int J Mol Sci. 2022 Sep 23;23(19):11182. doi: 10.3390/ijms231911182 (PMC9570346; doi:10.3390/ijms231911182)
Supplement: Supplementary file 1 [file ijms-23-11182-s001.zip › Supplementary.xlsx]

## Sheet: Supplementary Table S1
Supplementary Table S1: Spearman correlation analysis of the 20 m6A modification regulators
m6A regulators	ALKBH5	CBLL1	ELAVL1	FMR1	FTO	HNRNPC	IGF2BP1	IGF2BP2	IGF2BP3	METTL14	METTL16	METTL3	RBM15	RBM15B	RBMX	VIRMA	WTAP	YTHDC1	YTHDC2	ZCCHC4
ALKBH5	1	0.591696	0.623532	0.512754	0.65319	0.564072	0.133532	-0.0366971	0.0620184	0.602438	0.720174	0.537071	0.480666	0.533332	0.593285	0.509605	0.561049	0.662963	0.587522	0.586778
CBLL1	0.591696	1	0.703444	0.580677	0.586495	0.613941	0.06643	0.0194299	0.0640517	0.757704	0.614903	0.579974	0.620194	0.662849	0.723207	0.743333	0.602887	0.735482	0.701354	0.666409
ELAVL1	0.623532	0.703444	1	0.631468	0.473358	0.787405	0.107886	0.140392	0.166139	0.599794	0.595449	0.674539	0.652684	0.772285	0.786768	0.641071	0.628227	0.755188	0.622024	0.60926
FMR1	0.512754	0.580677	0.631468	1	0.500571	0.547629	0.132004	0.207429	0.184768	0.624763	0.54216	0.506243	0.52572	0.508038	0.706324	0.542396	0.535865	0.698152	0.606723	0.607857
FTO	0.65319	0.586495	0.473358	0.500571	1	0.42689	0.149409	-0.0894895	-0.00911594	0.673944	0.608834	0.344617	0.425567	0.408265	0.544949	0.57314	0.467851	0.63649	0.662078	0.592911
HNRNPC	0.564072	0.613941	0.787405	0.547629	0.42689	1	0.103648	0.0469144	0.10881	0.607293	0.519229	0.700823	0.568499	0.653988	0.830225	0.65703	0.693683	0.743491	0.56204	0.613562
IGF2BP1	0.133532	0.06643	0.107886	0.132004	0.149409	0.103648	1	0.322478	0.493844	0.0173401	0.0459102	-0.0373004	0.244696	-0.00290573	0.115606	0.154568	0.125988	0.0779428	0.0521184	0.115626
IGF2BP2	-0.0366971	0.0194299	0.140392	0.207429	-0.0894895	0.0469144	0.322478	1	0.575517	-0.0642628	0.0363779	-0.00589456	0.254721	0.126138	0.0766705	0.0253415	0.109784	-0.00100595	-0.107502	0.0322938
IGF2BP3	0.0620184	0.0640517	0.166139	0.184768	-0.00911594	0.10881	0.493844	0.575517	1	-0.0204695	-0.0184241	-0.0130883	0.346208	0.0381212	0.108039	0.131882	0.191432	0.0186179	-0.013795	0.0847746
METTL14	0.602438	0.757704	0.599794	0.624763	0.673944	0.607293	0.0173401	-0.0642628	-0.0204695	1	0.664443	0.538548	0.555257	0.598077	0.708231	0.736205	0.594663	0.807257	0.760088	0.72343
METTL16	0.720174	0.614903	0.595449	0.54216	0.608834	0.519229	0.0459102	0.0363779	-0.0184241	0.664443	1	0.533048	0.487721	0.587345	0.635681	0.54438	0.521404	0.694315	0.597253	0.59588
METTL3	0.537071	0.579974	0.674539	0.506243	0.344617	0.700823	-0.0373004	-0.00589456	-0.0130883	0.538548	0.533048	1	0.454743	0.672275	0.69094	0.516798	0.567326	0.684411	0.549558	0.581938
RBM15	0.480666	0.620194	0.652684	0.52572	0.425567	0.568499	0.244696	0.254721	0.346208	0.555257	0.487721	0.454743	1	0.592328	0.637021	0.656517	0.561722	0.621514	0.571407	0.507304
RBM15B	0.533332	0.662849	0.772285	0.508038	0.408265	0.653988	-0.00290573	0.126138	0.0381212	0.598077	0.587345	0.672275	0.592328	1	0.668684	0.607424	0.524937	0.696327	0.557469	0.565357
RBMX	0.593285	0.723207	0.786768	0.706324	0.544949	0.830225	0.115606	0.0766705	0.108039	0.708231	0.635681	0.69094	0.637021	0.668684	1	0.702165	0.711757	0.830427	0.695913	0.711862
VIRMA	0.509605	0.743333	0.641071	0.542396	0.57314	0.65703	0.154568	0.0253415	0.131882	0.736205	0.54438	0.516798	0.656517	0.607424	0.702165	1	0.568064	0.702487	0.663002	0.621795
WTAP	0.561049	0.602887	0.628227	0.535865	0.467851	0.693683	0.125988	0.109784	0.191432	0.594663	0.521404	0.567326	0.561722	0.524937	0.711757	0.568064	1	0.677135	0.575569	0.574364
YTHDC1	0.662963	0.735482	0.755188	0.698152	0.63649	0.743491	0.0779428	-0.00100595	0.0186179	0.807257	0.694315	0.684411	0.621514	0.696327	0.830427	0.702487	0.677135	1	0.778375	0.760759
YTHDC2	0.587522	0.701354	0.622024	0.606723	0.662078	0.56204	0.0521184	-0.107502	-0.013795	0.760088	0.597253	0.549558	0.571407	0.557469	0.695913	0.663002	0.575569	0.778375	1	0.689187
ZCCHC4	0.586778	0.666409	0.60926	0.607857	0.592911	0.613562	0.115626	0.0322938	0.0847746	0.72343	0.59588	0.581938	0.507304	0.565357	0.711862	0.621795	0.574364	0.760759	0.689187	1

## Sheet: Supplementary Table S2
Supplementary Table S2: Samples clustering in pan-cancer
Sample ID	m6Acluster	m6A.gene.cluster	m6Ascore
TCGA.2F.A9KO	m6Acluster 1	m6A.gene.cluster.A	High
TCGA.2F.A9KP	m6Acluster 1	m6A.gene.cluster.A	High
TCGA.2F.A9KQ	m6Acluster 1	m6A.gene.cluster.A	High
TCGA.2F.A9KR	m6Acluster 1	m6A.gene.cluster.A	High
TCGA.2F.A9KT	m6Acluster 1	m6A.gene.cluster.A	High
TCGA.2F.A9KW	m6Acluster 1	m6A.gene.cluster.A	High
TCGA.4Z.AA7M	m6Acluster 1	m6A.gene.cluster.A	High
TCGA.4Z.AA7N	m6Acluster 1	m6A.gene.cluster.A	High
TCGA.4Z.AA7O	m6Acluster 1	m6A.gene.cluster.A	High
TCGA.4Z.AA7Q	m6Acluster 1	m6A.gene.cluster.A	High
TCGA.4Z.AA7R	m6Acluster 1	m6A.gene.cluster.A	High
TCGA.4Z.AA7S	m6Acluster 1	m6A.gene.cluster.A	High
TCGA.4Z.AA7W	m6Acluster 1	m6A.gene.cluster.A	High
TCGA.4Z.AA7Y	m6Acluster 1	m6A.gene.cluster.A	High
TCGA.4Z.AA80	m6Acluster 1	m6A.gene.cluster.A	High
TCGA.4Z.AA81	m6Acluster 1	m6A.gene.cluster.A	High
TCGA.4Z.AA82	m6Acluster 1	m6A.gene.cluster.A	High
TCGA.4Z.AA83	m6Acluster 1	m6A.gene.cluster.A	High
TCGA.4Z.AA84	m6Acluster 1	m6A.gene.cluster.A	High
TCGA.4Z.AA86	m6Acluster 1	m6A.gene.cluster.A	High
TCGA.4Z.AA87	m6Acluster 1	m6A.gene.cluster.A	High
TCGA.4Z.AA89	m6Acluster 1	m6A.gene.cluster.A	High
TCGA.5N.A9KI	m6Acluster 1	m6A.gene.cluster.A	High
TCGA.5N.A9KM	m6Acluster 1	m6A.gene.cluster.A	High
TCGA.BL.A0C8	m6Acluster 1	m6A.gene.cluster.A	High
TCGA.BL.A13I	m6Acluster 1	m6A.gene.cluster.A	High
TCGA.BL.A13J	m6Acluster 1	m6A.gene.cluster.A	High
TCGA.BL.A3JM	m6Acluster 1	m6A.gene.cluster.A	High
TCGA.BL.A5ZZ	m6Acluster 1	m6A.gene.cluster.A	High
TCGA.BT.A0S7	m6Acluster 1	m6A.gene.cluster.A	High
TCGA.BT.A0YX	m6Acluster 1	m6A.gene.cluster.A	High
TCGA.BT.A20J	m6Acluster 1	m6A.gene.cluster.A	High
TCGA.BT.A20N	m6Acluster 1	m6A.gene.cluster.A	High
TCGA.BT.A20O	m6Acluster 1	m6A.gene.cluster.A	High
TCGA.BT.A20P	m6Acluster 1	m6A.gene.cluster.A	High
TCGA.BT.A20Q	m6Acluster 1	m6A.gene.cluster.A	High
TCGA.BT.A20R	m6Acluster 1	m6A.gene.cluster.A	High
TCGA.BT.A20T	m6Acluster 1	m6A.gene.cluster.A	High
TCGA.BT.A20U	m6Acluster 1	m6A.gene.cluster.A	High
TCGA.BT.A20V	m6Acluster 1	m6A.gene.cluster.A	High
TCGA.BT.A20W	m6Acluster 1	m6A.gene.cluster.A	High
TCGA.BT.A20X	m6Acluster 1	m6A.gene.cluster.A	High
TCGA.BT.A2LA	m6Acluster 1	m6A.gene.cluster.A	High
TCGA.BT.A2LB	m6Acluster 1	m6A.gene.cluster.A	High
TCGA.BT.A2LD	m6Acluster 1	m6A.gene.cluster.A	High
TCGA.BT.A3PH	m6Acluster 1	m6A.gene.cluster.A	High
TCGA.BT.A3PJ	m6Acluster 1	m6A.gene.cluster.A	High
TCGA.BT.A3PK	m6Acluster 1	m6A.gene.cluster.A	High
TCGA.BT.A42C	m6Acluster 1	m6A.gene.cluster.A	High
TCGA.BT.A42E	m6Acluster 1	m6A.gene.cluster.A	High
TCGA.BT.A42F	m6Acluster 1	m6A.gene.cluster.A	High
TCGA.C4.A0EZ	m6Acluster 1	m6A.gene.cluster.A	High
TCGA.C4.A0F0	m6Acluster 1	m6A.gene.cluster.A	High
TCGA.C4.A0F1	m6Acluster 1	m6A.gene.cluster.A	High
TCGA.C4.A0F6	m6Acluster 1	m6A.gene.cluster.A	High
TCGA.C4.A0F7	m6Acluster 1	m6A.gene.cluster.A	High
TCGA.CF.A1HR	m6Acluster 1	m6A.gene.cluster.A	High
TCGA.CF.A1HS	m6Acluster 1	m6A.gene.cluster.A	High
TCGA.CF.A27C	m6Acluster 1	m6A.gene.cluster.A	High
TCGA.CF.A3MF	m6Acluster 1	m6A.gene.cluster.A	High
TCGA.CF.A3MG	m6Acluster 1	m6A.gene.cluster.A	High
TCGA.CF.A3MH	m6Acluster 1	m6A.gene.cluster.A	High
TCGA.CF.A3MI	m6Acluster 1	m6A.gene.cluster.A	High
TCGA.CF.A47S	m6Acluster 1	m6A.gene.cluster.A	High
TCGA.CF.A47T	m6Acluster 1	m6A.gene.cluster.A	High
TCGA.CF.A47V	m6Acluster 1	m6A.gene.cluster.A	High
TCGA.CF.A47W	m6Acluster 1	m6A.gene.cluster.A	High
TCGA.CF.A47X	m6Acluster 1	m6A.gene.cluster.A	High
TCGA.CF.A47Y	m6Acluster 1	m6A.gene.cluster.A	High
TCGA.CF.A5U8	m6Acluster 1	m6A.gene.cluster.A	High
TCGA.CF.A5UA	m6Acluster 1	m6A.gene.cluster.A	High
TCGA.CF.A7I0	m6Acluster 1	m6A.gene.cluster.A	High
TCGA.CF.A8HX	m6Acluster 1	m6A.gene.cluster.A	High
TCGA.CF.A8HY	m6Acluster 1	m6A.gene.cluster.A	High
TCGA.CF.A9FF	m6Acluster 1	m6A.gene.cluster.A	High
TCGA.CF.A9FL	m6Acluster 1	m6A.gene.cluster.A	High
TCGA.CF.A9FM	m6Acluster 1	m6A.gene.cluster.A	High
TCGA.CU.A0YN	m6Acluster 1	m6A.gene.cluster.A	High
TCGA.CU.A0YO	m6Acluster 1	m6A.gene.cluster.A	High
TCGA.CU.A0YR	m6Acluster 1	m6A.gene.cluster.A	High
TCGA.CU.A3KJ	m6Acluster 1	m6A.gene.cluster.A	High
TCGA.CU.A3QU	m6Acluster 1	m6A.gene.cluster.A	High
TCGA.CU.A3YL	m6Acluster 2	m6A.gene.cluster.A	High
TCGA.CU.A5W6	m6Acluster 1	m6A.gene.cluster.A	High
TCGA.CU.A72E	m6Acluster 1	m6A.gene.cluster.A	High
TCGA.DK.A1A3	m6Acluster 1	m6A.gene.cluster.A	High
TCGA.DK.A1A5	m6Acluster 1	m6A.gene.cluster.A	High
TCGA.DK.A1A6	m6Acluster 1	m6A.gene.cluster.A	High
TCGA.DK.A1A7	m6Acluster 1	m6A.gene.cluster.A	High
TCGA.DK.A1AA	m6Acluster 1	m6A.gene.cluster.A	High
TCGA.DK.A1AB	m6Acluster 1	m6A.gene.cluster.A	High
TCGA.DK.A1AC	m6Acluster 1	m6A.gene.cluster.A	High
TCGA.DK.A1AD	m6Acluster 1	m6A.gene.cluster.A	High
TCGA.DK.A1AE	m6Acluster 1	m6A.gene.cluster.A	High
TCGA.DK.A1AF	m6Acluster 1	m6A.gene.cluster.A	High
TCGA.DK.A1AG	m6Acluster 1	m6A.gene.cluster.A	High
TCGA.DK.A2HX	m6Acluster 1	m6A.gene.cluster.A	High
TCGA.DK.A2I1	m6Acluster 1	m6A.gene.cluster.A	High
TCGA.DK.A2I2	m6Acluster 1	m6A.gene.cluster.A	High
TCGA.DK.A2I4	m6Acluster 1	m6A.gene.cluster.A	High
TCGA.DK.A2I6	m6Acluster 1	m6A.gene.cluster.A	High
TCGA.DK.A3IK	m6Acluster 1	m6A.gene.cluster.A	High
TCGA.DK.A3IL	m6Acluster 1	m6A.gene.cluster.A	High
TCGA.DK.A3IM	m6Acluster 1	m6A.gene.cluster.A	High
TCGA.DK.A3IN	m6Acluster 1	m6A.gene.cluster.A	High
TCGA.DK.A3IQ	m6Acluster 2	m6A.gene.cluster.A	High
TCGA.DK.A3IS	m6Acluster 1	m6A.gene.cluster.A	High
TCGA.DK.A3IT	m6Acluster 1	m6A.gene.cluster.A	High
TCGA.DK.A3IU	m6Acluster 1	m6A.gene.cluster.A	High
TCGA.DK.A3IV	m6Acluster 1	m6A.gene.cluster.A	High
TCGA.DK.A3WW	m6Acluster 1	m6A.gene.cluster.A	High
TCGA.DK.A3WX	m6Acluster 1	m6A.gene.cluster.A	High
TCGA.DK.A3WY	m6Acluster 1	m6A.gene.cluster.A	High
TCGA.DK.A3X1	m6Acluster 1	m6A.gene.cluster.A	High
TCGA.DK.A3X2	m6Acluster 1	m6A.gene.cluster.A	High
TCGA.DK.A6AV	m6Acluster 1	m6A.gene.cluster.A	High
TCGA.DK.A6AW	m6Acluster 1	m6A.gene.cluster.A	High
TCGA.DK.A6B0	m6Acluster 1	m6A.gene.cluster.A	High
TCGA.DK.A6B1	m6Acluster 1	m6A.gene.cluster.A	High
TCGA.DK.A6B2	m6Acluster 1	m6A.gene.cluster.A	High
TCGA.DK.A6B5	m6Acluster 2	m6A.gene.cluster.A	High
TCGA.DK.A6B6	m6Acluster 1	m6A.gene.cluster.A	High
TCGA.DK.AA6L	m6Acluster 1	m6A.gene.cluster.A	High
TCGA.DK.AA6M	m6Acluster 1	m6A.gene.cluster.A	High
TCGA.DK.AA6P	m6Acluster 1	m6A.gene.cluster.A	High
TCGA.DK.AA6Q	m6Acluster 1	m6A.gene.cluster.A	High
TCGA.DK.AA6R	m6Acluster 1	m6A.gene.cluster.A	High
TCGA.DK.AA6S	m6Acluster 1	m6A.gene.cluster.A	High
TCGA.DK.AA6T	m6Acluster 1	m6A.gene.cluster.A	High
TCGA.DK.AA6U	m6Acluster 1	m6A.gene.cluster.A	High
TCGA.DK.AA6W	m6Acluster 1	m6A.gene.cluster.A	High
TCGA.DK.AA6X	m6Acluster 1	m6A.gene.cluster.A	High
TCGA.DK.AA71	m6Acluster 1	m6A.gene.cluster.A	High
TCGA.DK.AA74	m6Acluster 1	m6A.gene.cluster.A	High
TCGA.DK.AA75	m6Acluster 1	m6A.gene.cluster.A	High
TCGA.DK.AA76	m6Acluster 1	m6A.gene.cluster.A	High
TCGA.DK.AA77	m6Acluster 1	m6A.gene.cluster.A	High
TCGA.E5.A2PC	m6Acluster 1	m6A.gene.cluster.A	High
TCGA.E5.A4TZ	m6Acluster 1	m6A.gene.cluster.A	High
TCGA.E5.A4U1	m6Acluster 1	m6A.gene.cluster.A	High
TCGA.E7.A3X6	m6Acluster 1	m6A.gene.cluster.A	High
TCGA.E7.A3Y1	m6Acluster 1	m6A.gene.cluster.A	High
TCGA.E7.A4IJ	m6Acluster 1	m6A.gene.cluster.A	High
TCGA.E7.A4XJ	m6Acluster 1	m6A.gene.cluster.A	High
TCGA.E7.A519	m6Acluster 1	m6A.gene.cluster.A	High
TCGA.E7.A541	m6Acluster 1	m6A.gene.cluster.A	High
TCGA.E7.A5KE	m6Acluster 1	m6A.gene.cluster.A	High
TCGA.E7.A5KF	m6Acluster 1	m6A.gene.cluster.A	High
TCGA.E7.A677	m6Acluster 1	m6A.gene.cluster.A	High
TCGA.E7.A678	m6Acluster 1	m6A.gene.cluster.A	High
TCGA.E7.A6MD	m6Acluster 1	m6A.gene.cluster.A	High
TCGA.E7.A6ME	m6Acluster 1	m6A.gene.cluster.A	High
TCGA.E7.A6MF	m6Acluster 1	m6A.gene.cluster.A	High
TCGA.E7.A7DU	m6Acluster 1	m6A.gene.cluster.A	High
TCGA.E7.A7DV	m6Acluster 1	m6A.gene.cluster.A	High
TCGA.E7.A7PW	m6Acluster 1	m6A.gene.cluster.A	High
TCGA.E7.A7XN	m6Acluster 1	m6A.gene.cluster.A	High
TCGA.E7.A85H	m6Acluster 1	m6A.gene.cluster.A	High
TCGA.E7.A8O7	m6Acluster 1	m6A.gene.cluster.A	High
TCGA.E7.A8O8	m6Acluster 1	m6A.gene.cluster.A	High
TCGA.E7.A97P	m6Acluster 1	m6A.gene.cluster.A	High
TCGA.E7.A97Q	m6Acluster 1	m6A.gene.cluster.A	High
TCGA.FD.A3B3	m6Acluster 1	m6A.gene.cluster.A	High
TCGA.FD.A3B4	m6Acluster 1	m6A.gene.cluster.A	High
TCGA.FD.A3B5	m6Acluster 1	m6A.gene.cluster.A	High
TCGA.FD.A3B6	m6Acluster 1	m6A.gene.cluster.A	High
TCGA.FD.A3B7	m6Acluster 1	m6A.gene.cluster.A	High
TCGA.FD.A3B8	m6Acluster 1	m6A.gene.cluster.A	High
TCGA.FD.A3N5	m6Acluster 1	m6A.gene.cluster.A	High
TCGA.FD.A3N6	m6Acluster 1	m6A.gene.cluster.A	High
TCGA.FD.A3NA	m6Acluster 1	m6A.gene.cluster.A	High
TCGA.FD.A3SJ	m6Acluster 1	m6A.gene.cluster.A	High
TCGA.FD.A3SL	m6Acluster 1	m6A.gene.cluster.A	High
TCGA.FD.A3SM	m6Acluster 1	m6A.gene.cluster.A	High
TCGA.FD.A3SN	m6Acluster 1	m6A.gene.cluster.A	High
TCGA.FD.A3SO	m6Acluster 1	m6A.gene.cluster.A	High
TCGA.FD.A3SP	m6Acluster 1	m6A.gene.cluster.A	High
TCGA.FD.A3SQ	m6Acluster 1	m6A.gene.cluster.A	High
TCGA.FD.A3SR	m6Acluster 1	m6A.gene.cluster.A	High
TCGA.FD.A3SS	m6Acluster 1	m6A.gene.cluster.A	High
TCGA.FD.A43N	m6Acluster 1	m6A.gene.cluster.A	High
TCGA.FD.A43P	m6Acluster 1	m6A.gene.cluster.A	High
TCGA.FD.A43S	m6Acluster 1	m6A.gene.cluster.A	High
TCGA.FD.A43U	m6Acluster 1	m6A.gene.cluster.A	High
TCGA.FD.A43X	m6Acluster 1	m6A.gene.cluster.A	High
TCGA.FD.A43Y	m6Acluster 1	m6A.gene.cluster.A	High
TCGA.FD.A5BR	m6Acluster 1	m6A.gene.cluster.A	High
TCGA.FD.A5BS	m6Acluster 1	m6A.gene.cluster.A	High
TCGA.FD.A5BT	m6Acluster 1	m6A.gene.cluster.A	High
TCGA.FD.A5BU	m6Acluster 1	m6A.gene.cluster.A	High
TCGA.FD.A5BV	m6Acluster 1	m6A.gene.cluster.A	High
TCGA.FD.A5BX	m6Acluster 1	m6A.gene.cluster.A	High
TCGA.FD.A5BY	m6Acluster 1	m6A.gene.cluster.A	High
TCGA.FD.A5BZ	m6Acluster 1	m6A.gene.cluster.A	High
TCGA.FD.A5C0	m6Acluster 1	m6A.gene.cluster.A	High
TCGA.FD.A5C1	m6Acluster 1	m6A.gene.cluster.A	High
TCGA.FD.A62N	m6Acluster 1	m6A.gene.cluster.A	High
TCGA.FD.A62O	m6Acluster 1	m6A.gene.cluster.A	High
TCGA.FD.A62P	m6Acluster 1	m6A.gene.cluster.A	High
TCGA.FD.A62S	m6Acluster 1	m6A.gene.cluster.A	High
TCGA.FD.A6TA	m6Acluster 1	m6A.gene.cluster.A	High
TCGA.FD.A6TB	m6Acluster 1	m6A.gene.cluster.A	High
TCGA.FD.A6TC	m6Acluster 1	m6A.gene.cluster.A	High
TCGA.FD.A6TD	m6Acluster 1	m6A.gene.cluster.A	High
TCGA.FD.A6TE	m6Acluster 1	m6A.gene.cluster.A	High
TCGA.FD.A6TF	m6Acluster 1	m6A.gene.cluster.A	High
TCGA.FD.A6TG	m6Acluster 1	m6A.gene.cluster.A	High
TCGA.FD.A6TH	m6Acluster 1	m6A.gene.cluster.A	High
TCGA.FD.A6TI	m6Acluster 2	m6A.gene.cluster.A	High
TCGA.FD.A6TK	m6Acluster 1	m6A.gene.cluster.A	High
TCGA.FJ.A3Z7	m6Acluster 1	m6A.gene.cluster.A	High
TCGA.FJ.A3Z9	m6Acluster 1	m6A.gene.cluster.A	High
TCGA.FJ.A3ZE	m6Acluster 1	m6A.gene.cluster.A	High
TCGA.FJ.A3ZF	m6Acluster 1	m6A.gene.cluster.A	High
TCGA.FJ.A871	m6Acluster 1	m6A.gene.cluster.A	High
TCGA.FT.A3EE	m6Acluster 1	m6A.gene.cluster.A	High
TCGA.FT.A61P	m6Acluster 1	m6A.gene.cluster.A	High
TCGA.G2.A2EC	m6Acluster 1	m6A.gene.cluster.A	High
TCGA.G2.A2EF	m6Acluster 1	m6A.gene.cluster.A	High
TCGA.G2.A2EJ	m6Acluster 1	m6A.gene.cluster.A	High
TCGA.G2.A2EK	m6Acluster 1	m6A.gene.cluster.A	High
TCGA.G2.A2EL	m6Acluster 1	m6A.gene.cluster.A	High
TCGA.G2.A2EO	m6Acluster 1	m6A.gene.cluster.A	High
TCGA.G2.A2ES	m6Acluster 1	m6A.gene.cluster.A	High
TCGA.G2.A3IB	m6Acluster 1	m6A.gene.cluster.A	High
TCGA.G2.A3IE	m6Acluster 1	m6A.gene.cluster.A	High
TCGA.G2.A3VY	m6Acluster 1	m6A.gene.cluster.A	High
TCGA.G2.AA3B	m6Acluster 1	m6A.gene.cluster.A	High
TCGA.G2.AA3C	m6Acluster 1	m6A.gene.cluster.A	High
TCGA.G2.AA3D	m6Acluster 1	m6A.gene.cluster.A	High
TCGA.G2.AA3F	m6Acluster 1	m6A.gene.cluster.A	High
TCGA.GC.A3BM	m6Acluster 1	m6A.gene.cluster.A	High
TCGA.GC.A3I6	m6Acluster 1	m6A.gene.cluster.A	High
TCGA.GC.A3OO	m6Acluster 1	m6A.gene.cluster.A	High
TCGA.GC.A3RB	m6Acluster 1	m6A.gene.cluster.A	High
TCGA.GC.A3RC	m6Acluster 1	m6A.gene.cluster.A	High
TCGA.GC.A3RD	m6Acluster 1	m6A.gene.cluster.A	High
TCGA.GC.A3WC	m6Acluster 1	m6A.gene.cluster.A	High
TCGA.GC.A3YS	m6Acluster 1	m6A.gene.cluster.A	High
TCGA.GC.A4ZW	m6Acluster 1	m6A.gene.cluster.A	High
TCGA.GD.A2C5	m6Acluster 1	m6A.gene.cluster.A	High
TCGA.GD.A3OP	m6Acluster 1	m6A.gene.cluster.A	High
TCGA.GD.A3OQ	m6Acluster 1	m6A.gene.cluster.A	High
TCGA.GD.A3OS	m6Acluster 1	m6A.gene.cluster.A	High
TCGA.GD.A6C6	m6Acluster 1	m6A.gene.cluster.A	High
TCGA.GD.A76B	m6Acluster 1	m6A.gene.cluster.A	High
TCGA.GU.A42P	m6Acluster 1	m6A.gene.cluster.A	High
TCGA.GU.A42Q	m6Acluster 1	m6A.gene.cluster.A	High
TCGA.GU.A42R	m6Acluster 1	m6A.gene.cluster.A	High
TCGA.GU.A762	m6Acluster 1	m6A.gene.cluster.A	High
TCGA.GU.A763	m6Acluster 1	m6A.gene.cluster.A	High
TCGA.GU.A764	m6Acluster 1	m6A.gene.cluster.A	High
TCGA.GU.A766	m6Acluster 1	m6A.gene.cluster.A	High
TCGA.GU.A767	m6Acluster 1	m6A.gene.cluster.A	High
TCGA.GU.AATO	m6Acluster 1	m6A.gene.cluster.A	High
TCGA.GU.AATP	m6Acluster 1	m6A.gene.cluster.A	High
TCGA.GU.AATQ	m6Acluster 1	m6A.gene.cluster.A	High
TCGA.GV.A3JV	m6Acluster 1	m6A.gene.cluster.A	High
TCGA.GV.A3JW	m6Acluster 1	m6A.gene.cluster.A	High
TCGA.GV.A3JX	m6Acluster 1	m6A.gene.cluster.A	High
TCGA.GV.A3JZ	m6Acluster 1	m6A.gene.cluster.A	High
TCGA.GV.A3QF	m6Acluster 1	m6A.gene.cluster.A	High
TCGA.GV.A3QH	m6Acluster 1	m6A.gene.cluster.A	High
TCGA.GV.A3QI	m6Acluster 2	m6A.gene.cluster.A	High
TCGA.GV.A3QK	m6Acluster 1	m6A.gene.cluster.A	High
TCGA.GV.A40E	m6Acluster 1	m6A.gene.cluster.A	High
TCGA.GV.A40G	m6Acluster 1	m6A.gene.cluster.A	High
TCGA.GV.A6ZA	m6Acluster 1	m6A.gene.cluster.A	High
TCGA.H4.A2HO	m6Acluster 1	m6A.gene.cluster.A	High
TCGA.H4.A2HQ	m6Acluster 1	m6A.gene.cluster.A	High
TCGA.HQ.A2OE	m6Acluster 1	m6A.gene.cluster.A	High
TCGA.HQ.A2OF	m6Acluster 1	m6A.gene.cluster.A	High
TCGA.HQ.A5ND	m6Acluster 1	m6A.gene.cluster.A	High
TCGA.HQ.A5NE	m6Acluster 1	m6A.gene.cluster.A	High
TCGA.K4.A3WS	m6Acluster 1	m6A.gene.cluster.A	High
TCGA.K4.A3WU	m6Acluster 1	m6A.gene.cluster.A	High
TCGA.K4.A3WV	m6Acluster 1	m6A.gene.cluster.A	High
TCGA.K4.A4AB	m6Acluster 1	m6A.gene.cluster.A	High
TCGA.K4.A4AC	m6Acluster 1	m6A.gene.cluster.A	High
TCGA.K4.A54R	m6Acluster 1	m6A.gene.cluster.A	High
TCGA.K4.A5RH	m6Acluster 1	m6A.gene.cluster.A	High
TCGA.K4.A5RI	m6Acluster 1	m6A.gene.cluster.A	High
TCGA.K4.A5RJ	m6Acluster 1	m6A.gene.cluster.A	High
TCGA.K4.A6FZ	m6Acluster 1	m6A.gene.cluster.A	High
TCGA.K4.A6MB	m6Acluster 1	m6A.gene.cluster.A	High
TCGA.K4.A83P	m6Acluster 1	m6A.gene.cluster.A	High
TCGA.K4.AAQO	m6Acluster 1	m6A.gene.cluster.A	High
TCGA.KQ.A41N	m6Acluster 1	m6A.gene.cluster.A	High
TCGA.KQ.A41O	m6Acluster 1	m6A.gene.cluster.A	High
TCGA.KQ.A41P	m6Acluster 1	m6A.gene.cluster.A	High
TCGA.KQ.A41Q	m6Acluster 1	m6A.gene.cluster.A	High
TCGA.KQ.A41R	m6Acluster 1	m6A.gene.cluster.A	High
TCGA.KQ.A41S	m6Acluster 1	m6A.gene.cluster.A	High
TCGA.LC.A66R	m6Acluster 1	m6A.gene.cluster.A	High
TCGA.LT.A5Z6	m6Acluster 1	m6A.gene.cluster.A	High
TCGA.LT.A8JT	m6Acluster 1	m6A.gene.cluster.A	High
TCGA.MV.A51V	m6Acluster 1	m6A.gene.cluster.A	High
TCGA.PQ.A6FI	m6Acluster 1	m6A.gene.cluster.A	High
TCGA.PQ.A6FN	m6Acluster 1	m6A.gene.cluster.A	High
TCGA.R3.A69X	m6Acluster 1	m6A.gene.cluster.A	High
TCGA.S5.A6DX	m6Acluster 1	m6A.gene.cluster.A	High
TCGA.S5.AA26	m6Acluster 1	m6A.gene.cluster.A	High
TCGA.SY.A9G0	m6Acluster 1	m6A.gene.cluster.A	High
TCGA.SY.A9G5	m6Acluster 1	m6A.gene.cluster.A	High
TCGA.UY.A78K	m6Acluster 1	m6A.gene.cluster.A	High
TCGA.UY.A78L	m6Acluster 1	m6A.gene.cluster.A	High
TCGA.UY.A78M	m6Acluster 1	m6A.gene.cluster.A	High
TCGA.UY.A78N	m6Acluster 1	m6A.gene.cluster.A	High
TCGA.UY.A78O	m6Acluster 1	m6A.gene.cluster.A	High
TCGA.UY.A78P	m6Acluster 1	m6A.gene.cluster.A	High
TCGA.UY.A8OB	m6Acluster 1	m6A.gene.cluster.A	High
TCGA.UY.A8OD	m6Acluster 1	m6A.gene.cluster.A	High
TCGA.UY.A9PA	m6Acluster 1	m6A.gene.cluster.A	High
TCGA.UY.A9PB	m6Acluster 1	m6A.gene.cluster.A	High
TCGA.UY.A9PD	m6Acluster 1	m6A.gene.cluster.A	High
TCGA.UY.A9PE	m6Acluster 1	m6A.gene.cluster.A	High
TCGA.UY.A9PF	m6Acluster 1	m6A.gene.cluster.A	High
TCGA.UY.A9PH	m6Acluster 1	m6A.gene.cluster.A	High
TCGA.XF.A8HB	m6Acluster 1	m6A.gene.cluster.A	High
TCGA.XF.A8HC	m6Acluster 1	m6A.gene.cluster.A	High
TCGA.XF.A8HD	m6Acluster 1	m6A.gene.cluster.A	High
TCGA.XF.A8HE	m6Acluster 1	m6A.gene.cluster.A	High
TCGA.XF.A8HF	m6Acluster 1	m6A.gene.cluster.A	High
TCGA.XF.A8HG	m6Acluster 1	m6A.gene.cluster.A	High
TCGA.XF.A8HH	m6Acluster 1	m6A.gene.cluster.A	High
TCGA.XF.A8HI	m6Acluster 1	m6A.gene.cluster.A	High
TCGA.XF.A9SH	m6Acluster 1	m6A.gene.cluster.A	High
TCGA.XF.A9SI	m6Acluster 1	m6A.gene.cluster.A	High
TCGA.XF.A9SJ	m6Acluster 1	m6A.gene.cluster.A	High
TCGA.XF.A9SK	m6Acluster 1	m6A.gene.cluster.A	High
TCGA.XF.A9SL	m6Acluster 1	m6A.gene.cluster.A	High
TCGA.XF.A9SM	m6Acluster 1	m6A.gene.cluster.A	High
TCGA.XF.A9SP	m6Acluster 1	m6A.gene.cluster.A	High
TCGA.XF.A9ST	m6Acluster 1	m6A.gene.cluster.A	High
TCGA.XF.A9SU	m6Acluster 1	m6A.gene.cluster.A	High
TCGA.XF.A9SV	m6Acluster 1	m6A.gene.cluster.A	High
TCGA.XF.A9SW	m6Acluster 1	m6A.gene.cluster.A	High
TCGA.XF.A9SX	m6Acluster 1	m6A.gene.cluster.A	High
TCGA.XF.A9SY	m6Acluster 1	m6A.gene.cluster.A	High
TCGA.XF.A9SZ	m6Acluster 1	m6A.gene.cluster.A	High
TCGA.XF.A9T0	m6Acluster 1	m6A.gene.cluster.A	High
TCGA.XF.A9T2	m6Acluster 1	m6A.gene.cluster.A	High
TCGA.XF.A9T3	m6Acluster 1	m6A.gene.cluster.A	High
TCGA.XF.A9T4	m6Acluster 1	m6A.gene.cluster.A	High
TCGA.XF.A9T5	m6Acluster 1	m6A.gene.cluster.A	High
TCGA.XF.A9T6	m6Acluster 1	m6A.gene.cluster.A	High
TCGA.XF.A9T8	m6Acluster 1	m6A.gene.cluster.A	High
TCGA.XF.AAME	m6Acluster 1	m6A.gene.cluster.A	High
TCGA.XF.AAMG	m6Acluster 1	m6A.gene.cluster.A	High
TCGA.XF.AAMH	m6Acluster 1	m6A.gene.cluster.A	High
TCGA.XF.AAMJ	m6Acluster 1	m6A.gene.cluster.A	High
TCGA.XF.AAML	m6Acluster 1	m6A.gene.cluster.A	High
TCGA.XF.AAMQ	m6Acluster 1	m6A.gene.cluster.A	High
TCGA.XF.AAMR	m6Acluster 2	m6A.gene.cluster.A	High
TCGA.XF.AAMT	m6Acluster 1	m6A.gene.cluster.A	High
TCGA.XF.AAMW	m6Acluster 1	m6A.gene.cluster.A	High
TCGA.XF.AAMX	m6Acluster 1	m6A.gene.cluster.A	High
TCGA.XF.AAMY	m6Acluster 1	m6A.gene.cluster.A	High
TCGA.XF.AAMZ	m6Acluster 1	m6A.gene.cluster.A	High
TCGA.XF.AAN0	m6Acluster 1	m6A.gene.cluster.A	High
TCGA.XF.AAN1	m6Acluster 1	m6A.gene.cluster.A	High
TCGA.XF.AAN2	m6Acluster 1	m6A.gene.cluster.A	High
TCGA.XF.AAN3	m6Acluster 1	m6A.gene.cluster.A	High
TCGA.XF.AAN4	m6Acluster 1	m6A.gene.cluster.A	High
TCGA.XF.AAN5	m6Acluster 1	m6A.gene.cluster.A	High
TCGA.XF.AAN7	m6Acluster 1	m6A.gene.cluster.A	High
TCGA.XF.AAN8	m6Acluster 1	m6A.gene.cluster.A	High
TCGA.YC.A89H	m6Acluster 1	m6A.gene.cluster.A	High
TCGA.YC.A8S6	m6Acluster 1	m6A.gene.cluster.A	High
TCGA.YC.A9TC	m6Acluster 1	m6A.gene.cluster.A	High
TCGA.YF.AA3L	m6Acluster 1	m6A.gene.cluster.A	High
TCGA.YF.AA3M	m6Acluster 1	m6A.gene.cluster.A	High
TCGA.ZF.A9R0	m6Acluster 1	m6A.gene.cluster.A	High
TCGA.ZF.A9R1	m6Acluster 1	m6A.gene.cluster.A	High
TCGA.ZF.A9R2	m6Acluster 1	m6A.gene.cluster.A	High
TCGA.ZF.A9R3	m6Acluster 1	m6A.gene.cluster.A	High
TCGA.ZF.A9R4	m6Acluster 1	m6A.gene.cluster.A	High
TCGA.ZF.A9R5	m6Acluster 1	m6A.gene.cluster.A	High
TCGA.ZF.A9R7	m6Acluster 1	m6A.gene.cluster.A	High
TCGA.ZF.A9R9	m6Acluster 1	m6A.gene.cluster.A	High
TCGA.ZF.A9RC	m6Acluster 1	m6A.gene.cluster.A	High
TCGA.ZF.A9RD	m6Acluster 1	m6A.gene.cluster.A	High
TCGA.ZF.A9RE	m6Acluster 1	m6A.gene.cluster.A	High
TCGA.ZF.A9RF	m6Acluster 1	m6A.gene.cluster.A	High
TCGA.ZF.A9RL	m6Acluster 1	m6A.gene.cluster.A	High
TCGA.ZF.A9RM	m6Acluster 1	m6A.gene.cluster.A	High
TCGA.ZF.A9RN	m6Acluster 1	m6A.gene.cluster.A	High
TCGA.ZF.AA4N	m6Acluster 1	m6A.gene.cluster.A	High
TCGA.ZF.AA4R	m6Acluster 1	m6A.gene.cluster.A	High
TCGA.ZF.AA4T	m6Acluster 1	m6A.gene.cluster.A	High
TCGA.ZF.AA4U	m6Acluster 1	m6A.gene.cluster.A	High
TCGA.ZF.AA4V	m6Acluster 1	m6A.gene.cluster.A	High
TCGA.ZF.AA4W	m6Acluster 1	m6A.gene.cluster.A	High
TCGA.ZF.AA4X	m6Acluster 1	m6A.gene.cluster.A	High
TCGA.ZF.AA51	m6Acluster 1	m6A.gene.cluster.A	High
TCGA.ZF.AA52	m6Acluster 1	m6A.gene.cluster.A	High
TCGA.ZF.AA53	m6Acluster 1	m6A.gene.cluster.A	High
TCGA.ZF.AA54	m6Acluster 1	m6A.gene.cluster.A	High
TCGA.ZF.AA56	m6Acluster 1	m6A.gene.cluster.A	High
TCGA.ZF.AA58	m6Acluster 1	m6A.gene.cluster.A	High
TCGA.ZF.AA5H	m6Acluster 1	m6A.gene.cluster.A	High
TCGA.ZF.AA5N	m6Acluster 1	m6A.gene.cluster.A	High
TCGA.ZF.AA5P	m6Acluster 1	m6A.gene.cluster.A	High
TCGA.3C.AAAU	m6Acluster 2	m6A.gene.cluster.A	High
TCGA.3C.AALI	m6Acluster 1	m6A.gene.cluster.A	High
TCGA.3C.AALJ	m6Acluster 1	m6A.gene.cluster.A	High
TCGA.3C.AALK	m6Acluster 1	m6A.gene.cluster.A	High
TCGA.4H.AAAK	m6Acluster 1	m6A.gene.cluster.A	High
TCGA.5L.AAT0	m6Acluster 1	m6A.gene.cluster.A	High
TCGA.5L.AAT1	m6Acluster 1	m6A.gene.cluster.A	High
TCGA.5T.A9QA	m6Acluster 1	m6A.gene.cluster.A	High
TCGA.A1.A0SB	m6Acluster 2	m6A.gene.cluster.A	High
TCGA.A1.A0SD	m6Acluster 1	m6A.gene.cluster.A	High
TCGA.A1.A0SE	m6Acluster 1	m6A.gene.cluster.A	High
TCGA.A1.A0SF	m6Acluster 1	m6A.gene.cluster.A	High
TCGA.A1.A0SG	m6Acluster 1	m6A.gene.cluster.A	High
TCGA.A1.A0SH	m6Acluster 1	m6A.gene.cluster.A	High
TCGA.A1.A0SI	m6Acluster 1	m6A.gene.cluster.A	High
TCGA.A1.A0SJ	m6Acluster 1	m6A.gene.cluster.A	High
TCGA.A1.A0SK	m6Acluster 1	m6A.gene.cluster.A	High
TCGA.A1.A0SM	m6Acluster 1	m6A.gene.cluster.A	High
TCGA.A1.A0SN	m6Acluster 1	m6A.gene.cluster.A	High
TCGA.A1.A0SO	m6Acluster 1	m6A.gene.cluster.A	High
TCGA.A1.A0SP	m6Acluster 1	m6A.gene.cluster.A	High
TCGA.A1.A0SQ	m6Acluster 2	m6A.gene.cluster.A	High
TCGA.A2.A04N	m6Acluster 1	m6A.gene.cluster.A	High
TCGA.A2.A04P	m6Acluster 1	m6A.gene.cluster.A	High
TCGA.A2.A04Q	m6Acluster 1	m6A.gene.cluster.A	High
TCGA.A2.A04R	m6Acluster 1	m6A.gene.cluster.A	High
TCGA.A2.A04T	m6Acluster 1	m6A.gene.cluster.A	High
TCGA.A2.A04U	m6Acluster 1	m6A.gene.cluster.A	High
TCGA.A2.A04V	m6Acluster 1	m6A.gene.cluster.A	High
TCGA.A2.A04W	m6Acluster 1	m6A.gene.cluster.A	High
TCGA.A2.A04X	m6Acluster 1	m6A.gene.cluster.A	High
TCGA.A2.A04Y	m6Acluster 1	m6A.gene.cluster.A	High
TCGA.A2.A0CK	m6Acluster 1	m6A.gene.cluster.A	High
TCGA.A2.A0CL	m6Acluster 2	m6A.gene.cluster.A	High
TCGA.A2.A0CM	m6Acluster 1	m6A.gene.cluster.A	High
TCGA.A2.A0CO	m6Acluster 2	m6A.gene.cluster.A	High
TCGA.A2.A0CP	m6Acluster 1	m6A.gene.cluster.A	High
TCGA.A2.A0CQ	m6Acluster 1	m6A.gene.cluster.A	High
TCGA.A2.A0CR	m6Acluster 1	m6A.gene.cluster.A	High
TCGA.A2.A0CS	m6Acluster 1	m6A.gene.cluster.A	High
TCGA.A2.A0CT	m6Acluster 1	m6A.gene.cluster.A	High
TCGA.A2.A0CU	m6Acluster 1	m6A.gene.cluster.A	High
TCGA.A2.A0CV	m6Acluster 1	m6A.gene.cluster.A	High
TCGA.A2.A0CW	m6Acluster 1	m6A.gene.cluster.A	High
TCGA.A2.A0CX	m6Acluster 1	m6A.gene.cluster.A	High
TCGA.A2.A0CY	m6Acluster 1	m6A.gene.cluster.A	High
TCGA.A2.A0CZ	m6Acluster 1	m6A.gene.cluster.A	High
TCGA.A2.A0D0	m6Acluster 1	m6A.gene.cluster.A	High
TCGA.A2.A0D1	m6Acluster 1	m6A.gene.cluster.A	High
TCGA.A2.A0D2	m6Acluster 1	m6A.gene.cluster.A	High
TCGA.A2.A0D3	m6Acluster 1	m6A.gene.cluster.A	High
TCGA.A2.A0D4	m6Acluster 1	m6A.gene.cluster.A	High
TCGA.A2.A0EM	m6Acluster 1	m6A.gene.cluster.A	High
TCGA.A2.A0EN	m6Acluster 1	m6A.gene.cluster.A	High
TCGA.A2.A0EO	m6Acluster 1	m6A.gene.cluster.A	High
TCGA.A2.A0EP	m6Acluster 1	m6A.gene.cluster.A	High
TCGA.A2.A0EQ	m6Acluster 1	m6A.gene.cluster.A	High
TCGA.A2.A0ER	m6Acluster 2	m6A.gene.cluster.A	High
TCGA.A2.A0ES	m6Acluster 1	m6A.gene.cluster.A	High
TCGA.A2.A0ET	m6Acluster 2	m6A.gene.cluster.A	High
TCGA.A2.A0EU	m6Acluster 1	m6A.gene.cluster.A	High
TCGA.A2.A0EV	m6Acluster 1	m6A.gene.cluster.A	High
TCGA.A2.A0EW	m6Acluster 1	m6A.gene.cluster.A	High
TCGA.A2.A0EX	m6Acluster 1	m6A.gene.cluster.A	High
TCGA.A2.A0EY	m6Acluster 1	m6A.gene.cluster.A	High
TCGA.A2.A0ST	m6Acluster 1	m6A.gene.cluster.A	High
TCGA.A2.A0SU	m6Acluster 1	m6A.gene.cluster.A	High
TCGA.A2.A0SV	m6Acluster 1	m6A.gene.cluster.A	High
TCGA.A2.A0SW	m6Acluster 1	m6A.gene.cluster.A	High
TCGA.A2.A0SX	m6Acluster 1	m6A.gene.cluster.A	High
TCGA.A2.A0SY	m6Acluster 1	m6A.gene.cluster.A	High
TCGA.A2.A0T0	m6Acluster 1	m6A.gene.cluster.A	High
TCGA.A2.A0T1	m6Acluster 1	m6A.gene.cluster.A	High
TCGA.A2.A0T2	m6Acluster 1	m6A.gene.cluster.A	High
TCGA.A2.A0T3	m6Acluster 1	m6A.gene.cluster.A	High
TCGA.A2.A0T4	m6Acluster 1	m6A.gene.cluster.A	High
TCGA.A2.A0T5	m6Acluster 1	m6A.gene.cluster.A	High
TCGA.A2.A0T6	m6Acluster 1	m6A.gene.cluster.A	High
TCGA.A2.A0T7	m6Acluster 1	m6A.gene.cluster.A	High
TCGA.A2.A0YC	m6Acluster 1	m6A.gene.cluster.A	High
TCGA.A2.A0YD	m6Acluster 1	m6A.gene.cluster.A	High
TCGA.A2.A0YE	m6Acluster 2	m6A.gene.cluster.A	High
TCGA.A2.A0YF	m6Acluster 1	m6A.gene.cluster.A	High
TCGA.A2.A0YG	m6Acluster 2	m6A.gene.cluster.A	High
TCGA.A2.A0YH	m6Acluster 1	m6A.gene.cluster.A	High
TCGA.A2.A0YI	m6Acluster 2	m6A.gene.cluster.A	High
TCGA.A2.A0YJ	m6Acluster 1	m6A.gene.cluster.A	High
TCGA.A2.A0YK	m6Acluster 1	m6A.gene.cluster.A	High
TCGA.A2.A0YL	m6Acluster 1	m6A.gene.cluster.A	High
TCGA.A2.A0YM	m6Acluster 1	m6A.gene.cluster.A	High
TCGA.A2.A0YT	m6Acluster 1	m6A.gene.cluster.A	High
TCGA.A2.A1FV	m6Acluster 1	m6A.gene.cluster.A	High
TCGA.A2.A1FW	m6Acluster 1	m6A.gene.cluster.A	High
TCGA.A2.A1FX	m6Acluster 1	m6A.gene.cluster.A	High
TCGA.A2.A1FZ	m6Acluster 1	m6A.gene.cluster.A	High
TCGA.A2.A1G0	m6Acluster 1	m6A.gene.cluster.A	High
TCGA.A2.A1G1	m6Acluster 1	m6A.gene.cluster.A	High
TCGA.A2.A1G4	m6Acluster 1	m6A.gene.cluster.A	High
TCGA.A2.A1G6	m6Acluster 2	m6A.gene.cluster.A	High
TCGA.A2.A259	m6Acluster 1	m6A.gene.cluster.A	High
TCGA.A2.A25A	m6Acluster 1	m6A.gene.cluster.A	High
TCGA.A2.A25B	m6Acluster 1	m6A.gene.cluster.A	High
TCGA.A2.A25C	m6Acluster 1	m6A.gene.cluster.A	High
TCGA.A2.A25E	m6Acluster 1	m6A.gene.cluster.A	High
TCGA.A2.A25F	m6Acluster 1	m6A.gene.cluster.A	High
TCGA.A2.A3KC	m6Acluster 1	m6A.gene.cluster.A	High
TCGA.A2.A3KD	m6Acluster 1	m6A.gene.cluster.A	High
TCGA.A2.A3XS	m6Acluster 1	m6A.gene.cluster.A	High
TCGA.A2.A3XT	m6Acluster 1	m6A.gene.cluster.A	High
TCGA.A2.A3XU	m6Acluster 1	m6A.gene.cluster.A	High
TCGA.A2.A3XV	m6Acluster 1	m6A.gene.cluster.A	High
TCGA.A2.A3XW	m6Acluster 1	m6A.gene.cluster.A	High
TCGA.A2.A3XX	m6Acluster 1	m6A.gene.cluster.A	High
TCGA.A2.A3XY	m6Acluster 1	m6A.gene.cluster.A	High
TCGA.A2.A3XZ	m6Acluster 1	m6A.gene.cluster.A	High
TCGA.A2.A3Y0	m6Acluster 1	m6A.gene.cluster.A	High
TCGA.A2.A4RW	m6Acluster 1	m6A.gene.cluster.A	High
TCGA.A2.A4RX	m6Acluster 2	m6A.gene.cluster.A	High
TCGA.A2.A4RY	m6Acluster 2	m6A.gene.cluster.A	High
TCGA.A2.A4S0	m6Acluster 2	m6A.gene.cluster.A	High
TCGA.A2.A4S1	m6Acluster 2	m6A.gene.cluster.A	High
TCGA.A2.A4S2	m6Acluster 1	m6A.gene.cluster.A	High
TCGA.A2.A4S3	m6Acluster 1	m6A.gene.cluster.A	High
TCGA.A7.A0CD	m6Acluster 1	m6A.gene.cluster.A	High
TCGA.A7.A0CE	m6Acluster 1	m6A.gene.cluster.A	High
TCGA.A7.A0CG	m6Acluster 1	m6A.gene.cluster.A	High
TCGA.A7.A0CH	m6Acluster 1	m6A.gene.cluster.A	High
TCGA.A7.A0CJ	m6Acluster 1	m6A.gene.cluster.A	High
TCGA.A7.A0D9	m6Acluster 1	m6A.gene.cluster.A	High
TCGA.A7.A0DA	m6Acluster 1	m6A.gene.cluster.A	High
TCGA.A7.A0DB	m6Acluster 1	m6A.gene.cluster.A	High
TCGA.A7.A0DC	m6Acluster 1	m6A.gene.cluster.A	High
TCGA.A7.A13D	m6Acluster 1	m6A.gene.cluster.A	High
TCGA.A7.A13E	m6Acluster 1	m6A.gene.cluster.A	High
TCGA.A7.A13F	m6Acluster 1	m6A.gene.cluster.A	High
TCGA.A7.A13G	m6Acluster 1	m6A.gene.cluster.A	High
TCGA.A7.A13H	m6Acluster 1	m6A.gene.cluster.A	High
TCGA.A7.A26E	m6Acluster 1	m6A.gene.cluster.A	High
TCGA.A7.A26F	m6Acluster 1	m6A.gene.cluster.A	High
TCGA.A7.A26G	m6Acluster 1	m6A.gene.cluster.A	High
TCGA.A7.A26H	m6Acluster 1	m6A.gene.cluster.A	High
TCGA.A7.A26I	m6Acluster 1	m6A.gene.cluster.A	High
TCGA.A7.A26J	m6Acluster 1	m6A.gene.cluster.A	High
TCGA.A7.A2KD	m6Acluster 1	m6A.gene.cluster.A	High
TCGA.A7.A3IY	m6Acluster 1	m6A.gene.cluster.A	High
TCGA.A7.A3IZ	m6Acluster 1	m6A.gene.cluster.A	High
TCGA.A7.A3J0	m6Acluster 1	m6A.gene.cluster.A	High
TCGA.A7.A3J1	m6Acluster 1	m6A.gene.cluster.A	High
TCGA.A7.A3RF	m6Acluster 2	m6A.gene.cluster.A	High
TCGA.A7.A425	m6Acluster 1	m6A.gene.cluster.A	High
TCGA.A7.A426	m6Acluster 1	m6A.gene.cluster.A	High
TCGA.A7.A4SA	m6Acluster 2	m6A.gene.cluster.A	High
TCGA.A7.A4SB	m6Acluster 2	m6A.gene.cluster.A	High
TCGA.A7.A4SC	m6Acluster 1	m6A.gene.cluster.A	High
TCGA.A7.A4SD	m6Acluster 1	m6A.gene.cluster.A	High
TCGA.A7.A4SE	m6Acluster 1	m6A.gene.cluster.A	High
TCGA.A7.A4SF	m6Acluster 2	m6A.gene.cluster.A	High
TCGA.A7.A56D	m6Acluster 1	m6A.gene.cluster.A	High
TCGA.A7.A5ZV	m6Acluster 1	m6A.gene.cluster.A	High
TCGA.A7.A5ZW	m6Acluster 1	m6A.gene.cluster.A	High
TCGA.A7.A5ZX	m6Acluster 1	m6A.gene.cluster.A	High
TCGA.A7.A6VV	m6Acluster 1	m6A.gene.cluster.A	High
TCGA.A7.A6VW	m6Acluster 1	m6A.gene.cluster.A	High
TCGA.A7.A6VX	m6Acluster 1	m6A.gene.cluster.A	High
TCGA.A7.A6VY	m6Acluster 1	m6A.gene.cluster.A	High
TCGA.A8.A06O	m6Acluster 1	m6A.gene.cluster.A	High
TCGA.A8.A06P	m6Acluster 1	m6A.gene.cluster.A	High
TCGA.A8.A06Q	m6Acluster 1	m6A.gene.cluster.A	High
TCGA.A8.A06R	m6Acluster 1	m6A.gene.cluster.A	High
TCGA.A8.A06T	m6Acluster 2	m6A.gene.cluster.A	High
TCGA.A8.A06U	m6Acluster 2	m6A.gene.cluster.A	High
TCGA.A8.A06X	m6Acluster 2	m6A.gene.cluster.A	High
TCGA.A8.A06Y	m6Acluster 1	m6A.gene.cluster.A	High
TCGA.A8.A06Z	m6Acluster 1	m6A.gene.cluster.A	High
TCGA.A8.A075	m6Acluster 1	m6A.gene.cluster.A	High
TCGA.A8.A076	m6Acluster 1	m6A.gene.cluster.A	High
TCGA.A8.A079	m6Acluster 1	m6A.gene.cluster.A	High
TCGA.A8.A07B	m6Acluster 1	m6A.gene.cluster.A	High
TCGA.A8.A07C	m6Acluster 1	m6A.gene.cluster.A	High
TCGA.A8.A07E	m6Acluster 1	m6A.gene.cluster.A	High
TCGA.A8.A07F	m6Acluster 1	m6A.gene.cluster.A	High
TCGA.A8.A07G	m6Acluster 1	m6A.gene.cluster.A	High
TCGA.A8.A07I	m6Acluster 1	m6A.gene.cluster.A	High
TCGA.A8.A07J	m6Acluster 1	m6A.gene.cluster.A	High
TCGA.A8.A07L	m6Acluster 1	m6A.gene.cluster.A	High
TCGA.A8.A07O	m6Acluster 1	m6A.gene.cluster.A	High
TCGA.A8.A07P	m6Acluster 1	m6A.gene.cluster.A	High
TCGA.A8.A07R	m6Acluster 1	m6A.gene.cluster.A	High
TCGA.A8.A07S	m6Acluster 1	m6A.gene.cluster.A	High
TCGA.A8.A07U	m6Acluster 1	m6A.gene.cluster.A	High
TCGA.A8.A07W	m6Acluster 1	m6A.gene.cluster.A	High
TCGA.A8.A07Z	m6Acluster 2	m6A.gene.cluster.A	High
TCGA.A8.A082	m6Acluster 1	m6A.gene.cluster.A	High
TCGA.A8.A084	m6Acluster 1	m6A.gene.cluster.A	High
TCGA.A8.A085	m6Acluster 1	m6A.gene.cluster.A	High
TCGA.A8.A086	m6Acluster 1	m6A.gene.cluster.A	High
TCGA.A8.A08A	m6Acluster 1	m6A.gene.cluster.A	High
TCGA.A8.A08B	m6Acluster 1	m6A.gene.cluster.A	High
TCGA.A8.A08C	m6Acluster 1	m6A.gene.cluster.A	High
TCGA.A8.A08F	m6Acluster 1	m6A.gene.cluster.A	High
TCGA.A8.A08G	m6Acluster 1	m6A.gene.cluster.A	High
TCGA.A8.A08I	m6Acluster 2	m6A.gene.cluster.A	High
TCGA.A8.A08J	m6Acluster 1	m6A.gene.cluster.A	High
TCGA.A8.A08L	m6Acluster 1	m6A.gene.cluster.A	High
TCGA.A8.A08O	m6Acluster 1	m6A.gene.cluster.A	High
TCGA.A8.A08P	m6Acluster 1	m6A.gene.cluster.A	High
TCGA.A8.A08R	m6Acluster 1	m6A.gene.cluster.A	High
TCGA.A8.A08S	m6Acluster 1	m6A.gene.cluster.A	High
TCGA.A8.A08T	m6Acluster 1	m6A.gene.cluster.A	High
TCGA.A8.A08X	m6Acluster 1	m6A.gene.cluster.A	High
TCGA.A8.A08Z	m6Acluster 1	m6A.gene.cluster.A	High
TCGA.A8.A091	m6Acluster 1	m6A.gene.cluster.A	High
TCGA.A8.A092	m6Acluster 1	m6A.gene.cluster.A	High
TCGA.A8.A093	m6Acluster 1	m6A.gene.cluster.A	High
TCGA.A8.A095	m6Acluster 1	m6A.gene.cluster.A	High
TCGA.A8.A097	m6Acluster 1	m6A.gene.cluster.A	High
TCGA.A8.A099	m6Acluster 1	m6A.gene.cluster.A	High
TCGA.A8.A09A	m6Acluster 1	m6A.gene.cluster.A	High
TCGA.A8.A09B	m6Acluster 1	m6A.gene.cluster.A	High
TCGA.A8.A09C	m6Acluster 1	m6A.gene.cluster.A	High
TCGA.A8.A09D	m6Acluster 1	m6A.gene.cluster.A	High
TCGA.A8.A09E	m6Acluster 1	m6A.gene.cluster.A	High
TCGA.A8.A09I	m6Acluster 1	m6A.gene.cluster.A	High
TCGA.A8.A09K	m6Acluster 1	m6A.gene.cluster.A	High
TCGA.A8.A09M	m6Acluster 1	m6A.gene.cluster.A	High
TCGA.A8.A09N	m6Acluster 1	m6A.gene.cluster.A	High
TCGA.A8.A09Q	m6Acluster 1	m6A.gene.cluster.A	High
TCGA.A8.A09R	m6Acluster 1	m6A.gene.cluster.A	High
TCGA.A8.A09T	m6Acluster 1	m6A.gene.cluster.A	High
TCGA.A8.A09V	m6Acluster 2	m6A.gene.cluster.A	High
TCGA.A8.A09W	m6Acluster 1	m6A.gene.cluster.A	High
TCGA.A8.A09X	m6Acluster 1	m6A.gene.cluster.A	High
TCGA.A8.A0A1	m6Acluster 1	m6A.gene.cluster.A	High
TCGA.A8.A0A2	m6Acluster 1	m6A.gene.cluster.A	High
TCGA.A8.A0A4	m6Acluster 1	m6A.gene.cluster.A	High
TCGA.A8.A0A6	m6Acluster 1	m6A.gene.cluster.A	High
TCGA.A8.A0A7	m6Acluster 1	m6A.gene.cluster.A	High
TCGA.A8.A0A9	m6Acluster 1	m6A.gene.cluster.A	High
TCGA.A8.A0AB	m6Acluster 1	m6A.gene.cluster.A	High
TCGA.A8.A0AD	m6Acluster 1	m6A.gene.cluster.A	High
TCGA.AC.A23C	m6Acluster 1	m6A.gene.cluster.A	High
TCGA.AC.A23E	m6Acluster 1	m6A.gene.cluster.A	High
TCGA.AC.A23G	m6Acluster 1	m6A.gene.cluster.A	High
TCGA.AC.A2B8	m6Acluster 1	m6A.gene.cluster.A	High
TCGA.AC.A2BK	m6Acluster 1	m6A.gene.cluster.A	High
TCGA.AC.A2BM	m6Acluster 1	m6A.gene.cluster.A	High
TCGA.AC.A2FB	m6Acluster 2	m6A.gene.cluster.A	High
TCGA.AC.A2FE	m6Acluster 1	m6A.gene.cluster.A	High
TCGA.AC.A2FF	m6Acluster 1	m6A.gene.cluster.A	High
TCGA.AC.A2FG	m6Acluster 1	m6A.gene.cluster.A	High
TCGA.AC.A2FK	m6Acluster 2	m6A.gene.cluster.A	High
TCGA.AC.A2FM	m6Acluster 1	m6A.gene.cluster.A	High
TCGA.AC.A2FO	m6Acluster 1	m6A.gene.cluster.A	High
TCGA.AC.A2QH	m6Acluster 2	m6A.gene.cluster.A	High
TCGA.AC.A2QI	m6Acluster 1	m6A.gene.cluster.A	High
TCGA.AC.A2QJ	m6Acluster 1	m6A.gene.cluster.A	High
TCGA.AC.A3BB	m6Acluster 1	m6A.gene.cluster.A	High
TCGA.AC.A3EH	m6Acluster 1	m6A.gene.cluster.A	High
TCGA.AC.A3HN	m6Acluster 1	m6A.gene.cluster.A	High
TCGA.AC.A3OD	m6Acluster 1	m6A.gene.cluster.A	High
TCGA.AC.A3QP	m6Acluster 1	m6A.gene.cluster.A	High
TCGA.AC.A3QQ	m6Acluster 1	m6A.gene.cluster.A	High
TCGA.AC.A3TM	m6Acluster 1	m6A.gene.cluster.A	High
TCGA.AC.A3TN	m6Acluster 1	m6A.gene.cluster.A	High
TCGA.AC.A3W5	m6Acluster 1	m6A.gene.cluster.A	High
TCGA.AC.A3W7	m6Acluster 1	m6A.gene.cluster.A	High
TCGA.AC.A3YI	m6Acluster 1	m6A.gene.cluster.A	High
TCGA.AC.A3YJ	m6Acluster 2	m6A.gene.cluster.A	High
TCGA.AC.A4ZE	m6Acluster 1	m6A.gene.cluster.A	High
TCGA.AC.A5EH	m6Acluster 1	m6A.gene.cluster.A	High
TCGA.AC.A5XS	m6Acluster 1	m6A.gene.cluster.A	High
TCGA.AC.A5XU	m6Acluster 1	m6A.gene.cluster.A	High
TCGA.AC.A62V	m6Acluster 1	m6A.gene.cluster.A	High
TCGA.AC.A62X	m6Acluster 1	m6A.gene.cluster.A	High
TCGA.AC.A62Y	m6Acluster 1	m6A.gene.cluster.A	High
TCGA.AC.A6IV	m6Acluster 1	m6A.gene.cluster.A	High
TCGA.AC.A6IW	m6Acluster 1	m6A.gene.cluster.A	High
TCGA.AC.A6IX	m6Acluster 1	m6A.gene.cluster.A	High
TCGA.AC.A6NO	m6Acluster 1	m6A.gene.cluster.A	High
TCGA.AC.A7VB	m6Acluster 1	m6A.gene.cluster.A	High
TCGA.AC.A7VC	m6Acluster 1	m6A.gene.cluster.A	High
TCGA.AC.A8OP	m6Acluster 1	m6A.gene.cluster.A	High
TCGA.AC.A8OQ	m6Acluster 1	m6A.gene.cluster.A	High
TCGA.AC.A8OR	m6Acluster 1	m6A.gene.cluster.A	High
TCGA.AC.A8OS	m6Acluster 1	m6A.gene.cluster.A	High
TCGA.AN.A03X	m6Acluster 1	m6A.gene.cluster.A	High
TCGA.AN.A03Y	m6Acluster 1	m6A.gene.cluster.A	High
TCGA.AN.A041	m6Acluster 1	m6A.gene.cluster.A	High
TCGA.AN.A046	m6Acluster 1	m6A.gene.cluster.A	High
TCGA.AN.A049	m6Acluster 1	m6A.gene.cluster.A	High
TCGA.AN.A04A	m6Acluster 1	m6A.gene.cluster.A	High
TCGA.AN.A04C	m6Acluster 1	m6A.gene.cluster.A	High
TCGA.AN.A04D	m6Acluster 1	m6A.gene.cluster.A	High
TCGA.AN.A0AJ	m6Acluster 1	m6A.gene.cluster.A	High
TCGA.AN.A0AK	m6Acluster 1	m6A.gene.cluster.A	High
TCGA.AN.A0AL	m6Acluster 1	m6A.gene.cluster.A	High
TCGA.AN.A0AM	m6Acluster 1	m6A.gene.cluster.A	High
TCGA.AN.A0AR	m6Acluster 2	m6A.gene.cluster.A	High
TCGA.AN.A0AS	m6Acluster 1	m6A.gene.cluster.A	High
TCGA.AN.A0AT	m6Acluster 1	m6A.gene.cluster.A	High
TCGA.AN.A0FD	m6Acluster 1	m6A.gene.cluster.A	High
TCGA.AN.A0FF	m6Acluster 1	m6A.gene.cluster.A	High
TCGA.AN.A0FJ	m6Acluster 1	m6A.gene.cluster.A	High
TCGA.AN.A0FK	m6Acluster 1	m6A.gene.cluster.A	High
TCGA.AN.A0FL	m6Acluster 1	m6A.gene.cluster.A	High
TCGA.AN.A0FN	m6Acluster 1	m6A.gene.cluster.A	High
TCGA.AN.A0FS	m6Acluster 1	m6A.gene.cluster.A	High
TCGA.AN.A0FT	m6Acluster 1	m6A.gene.cluster.A	High
TCGA.AN.A0FV	m6Acluster 1	m6A.gene.cluster.A	High
TCGA.AN.A0FW	m6Acluster 1	m6A.gene.cluster.A	High
TCGA.AN.A0FX	m6Acluster 1	m6A.gene.cluster.A	High
TCGA.AN.A0FY	m6Acluster 1	m6A.gene.cluster.A	High
TCGA.AN.A0FZ	m6Acluster 1	m6A.gene.cluster.A	High
TCGA.AN.A0G0	m6Acluster 1	m6A.gene.cluster.A	High
TCGA.AN.A0XL	m6Acluster 1	m6A.gene.cluster.A	High
TCGA.AN.A0XN	m6Acluster 1	m6A.gene.cluster.A	High
TCGA.AN.A0XO	m6Acluster 1	m6A.gene.cluster.A	High
TCGA.AN.A0XP	m6Acluster 1	m6A.gene.cluster.A	High
TCGA.AN.A0XR	m6Acluster 1	m6A.gene.cluster.A	High
TCGA.AN.A0XS	m6Acluster 1	m6A.gene.cluster.A	High
TCGA.AN.A0XT	m6Acluster 1	m6A.gene.cluster.A	High
TCGA.AN.A0XU	m6Acluster 1	m6A.gene.cluster.A	High
TCGA.AN.A0XV	m6Acluster 1	m6A.gene.cluster.A	High
TCGA.AN.A0XW	m6Acluster 2	m6A.gene.cluster.A	High
TCGA.AO.A03L	m6Acluster 1	m6A.gene.cluster.A	High
TCGA.AO.A03M	m6Acluster 1	m6A.gene.cluster.A	High
TCGA.AO.A03N	m6Acluster 1	m6A.gene.cluster.A	High
TCGA.AO.A03O	m6Acluster 1	m6A.gene.cluster.A	High
TCGA.AO.A03P	m6Acluster 1	m6A.gene.cluster.A	High
TCGA.AO.A03R	m6Acluster 1	m6A.gene.cluster.A	High
TCGA.AO.A03T	m6Acluster 1	m6A.gene.cluster.A	High
TCGA.AO.A03U	m6Acluster 1	m6A.gene.cluster.A	High
TCGA.AO.A03V	m6Acluster 1	m6A.gene.cluster.A	High
TCGA.AO.A0J2	m6Acluster 1	m6A.gene.cluster.A	High
TCGA.AO.A0J3	m6Acluster 1	m6A.gene.cluster.A	High
TCGA.AO.A0J4	m6Acluster 1	m6A.gene.cluster.A	High
TCGA.AO.A0J5	m6Acluster 1	m6A.gene.cluster.A	High
TCGA.AO.A0J6	m6Acluster 1	m6A.gene.cluster.A	High
TCGA.AO.A0J7	m6Acluster 1	m6A.gene.cluster.A	High
TCGA.AO.A0J8	m6Acluster 1	m6A.gene.cluster.A	High
TCGA.AO.A0J9	m6Acluster 1	m6A.gene.cluster.A	High
TCGA.AO.A0JA	m6Acluster 1	m6A.gene.cluster.A	High
TCGA.AO.A0JB	m6Acluster 1	m6A.gene.cluster.A	High
TCGA.AO.A0JC	m6Acluster 1	m6A.gene.cluster.A	High
TCGA.AO.A0JD	m6Acluster 1	m6A.gene.cluster.A	High
TCGA.AO.A0JE	m6Acluster 1	m6A.gene.cluster.A	High
TCGA.AO.A0JF	m6Acluster 1	m6A.gene.cluster.A	High
TCGA.AO.A0JG	m6Acluster 1	m6A.gene.cluster.A	High
TCGA.AO.A0JI	m6Acluster 1	m6A.gene.cluster.A	High
TCGA.AO.A0JJ	m6Acluster 1	m6A.gene.cluster.A	High
TCGA.AO.A0JL	m6Acluster 1	m6A.gene.cluster.A	High
TCGA.AO.A0JM	m6Acluster 1	m6A.gene.cluster.A	High
TCGA.AO.A124	m6Acluster 1	m6A.gene.cluster.A	High
TCGA.AO.A125	m6Acluster 1	m6A.gene.cluster.A	High
TCGA.AO.A126	m6Acluster 1	m6A.gene.cluster.A	High
TCGA.AO.A128	m6Acluster 1	m6A.gene.cluster.A	High
TCGA.AO.A129	m6Acluster 1	m6A.gene.cluster.A	High
TCGA.AO.A12A	m6Acluster 1	m6A.gene.cluster.A	High
TCGA.AO.A12B	m6Acluster 1	m6A.gene.cluster.A	High
TCGA.AO.A12C	m6Acluster 2	m6A.gene.cluster.A	High
TCGA.AO.A12D	m6Acluster 1	m6A.gene.cluster.A	High
TCGA.AO.A12E	m6Acluster 1	m6A.gene.cluster.A	High
TCGA.AO.A12F	m6Acluster 1	m6A.gene.cluster.A	High
TCGA.AO.A12G	m6Acluster 1	m6A.gene.cluster.A	High
TCGA.AO.A12H	m6Acluster 1	m6A.gene.cluster.A	High
TCGA.AO.A1KO	m6Acluster 2	m6A.gene.cluster.A	High
TCGA.AO.A1KP	m6Acluster 1	m6A.gene.cluster.A	High
TCGA.AO.A1KQ	m6Acluster 1	m6A.gene.cluster.A	High
TCGA.AO.A1KR	m6Acluster 1	m6A.gene.cluster.A	High
TCGA.AO.A1KS	m6Acluster 1	m6A.gene.cluster.A	High
TCGA.AO.A1KT	m6Acluster 1	m6A.gene.cluster.A	High
TCGA.AQ.A04H	m6Acluster 1	m6A.gene.cluster.A	High
TCGA.AQ.A04J	m6Acluster 1	m6A.gene.cluster.A	High
TCGA.AQ.A04L	m6Acluster 1	m6A.gene.cluster.A	High
TCGA.AQ.A0Y5	m6Acluster 2	m6A.gene.cluster.A	High
TCGA.AQ.A1H2	m6Acluster 2	m6A.gene.cluster.A	High
TCGA.AQ.A1H3	m6Acluster 1	m6A.gene.cluster.A	High
TCGA.AQ.A54N	m6Acluster 1	m6A.gene.cluster.A	High
TCGA.AQ.A54O	m6Acluster 1	m6A.gene.cluster.A	High
TCGA.AQ.A7U7	m6Acluster 1	m6A.gene.cluster.A	High
TCGA.AR.A0TP	m6Acluster 1	m6A.gene.cluster.A	High
TCGA.AR.A0TQ	m6Acluster 1	m6A.gene.cluster.A	High
TCGA.AR.A0TR	m6Acluster 1	m6A.gene.cluster.A	High
TCGA.AR.A0TS	m6Acluster 2	m6A.gene.cluster.A	High
TCGA.AR.A0TT	m6Acluster 1	m6A.gene.cluster.A	High
TCGA.AR.A0TU	m6Acluster 1	m6A.gene.cluster.A	High
TCGA.AR.A0TV	m6Acluster 1	m6A.gene.cluster.A	High
TCGA.AR.A0TW	m6Acluster 2	m6A.gene.cluster.A	High
TCGA.AR.A0TX	m6Acluster 2	m6A.gene.cluster.A	High
TCGA.AR.A0TY	m6Acluster 1	m6A.gene.cluster.A	High
TCGA.AR.A0TZ	m6Acluster 1	m6A.gene.cluster.A	High
TCGA.AR.A0U0	m6Acluster 1	m6A.gene.cluster.A	High
TCGA.AR.A0U2	m6Acluster 1	m6A.gene.cluster.A	High
TCGA.AR.A0U3	m6Acluster 1	m6A.gene.cluster.A	High
TCGA.AR.A0U4	m6Acluster 1	m6A.gene.cluster.A	High
TCGA.AR.A1AH	m6Acluster 1	m6A.gene.cluster.A	High
TCGA.AR.A1AI	m6Acluster 1	m6A.gene.cluster.A	High
TCGA.AR.A1AJ	m6Acluster 1	m6A.gene.cluster.A	High
TCGA.AR.A1AK	m6Acluster 1	m6A.gene.cluster.A	High
TCGA.AR.A1AL	m6Acluster 1	m6A.gene.cluster.A	High
TCGA.AR.A1AM	m6Acluster 1	m6A.gene.cluster.A	High
TCGA.AR.A1AN	m6Acluster 1	m6A.gene.cluster.A	High
TCGA.AR.A1AO	m6Acluster 1	m6A.gene.cluster.A	High
TCGA.AR.A1AP	m6Acluster 1	m6A.gene.cluster.A	High
TCGA.AR.A1AQ	m6Acluster 1	m6A.gene.cluster.A	High
TCGA.AR.A1AR	m6Acluster 1	m6A.gene.cluster.A	High
TCGA.AR.A1AS	m6Acluster 1	m6A.gene.cluster.A	High
TCGA.AR.A1AT	m6Acluster 1	m6A.gene.cluster.A	High
TCGA.AR.A1AU	m6Acluster 1	m6A.gene.cluster.A	High
TCGA.AR.A1AV	m6Acluster 1	m6A.gene.cluster.A	High
TCGA.AR.A1AW	m6Acluster 1	m6A.gene.cluster.A	High
TCGA.AR.A1AX	m6Acluster 1	m6A.gene.cluster.A	High
TCGA.AR.A1AY	m6Acluster 1	m6A.gene.cluster.A	High
TCGA.AR.A24H	m6Acluster 1	m6A.gene.cluster.A	High
TCGA.AR.A24K	m6Acluster 1	m6A.gene.cluster.A	High
TCGA.AR.A24L	m6Acluster 1	m6A.gene.cluster.A	High
TCGA.AR.A24M	m6Acluster 1	m6A.gene.cluster.A	High
TCGA.AR.A24N	m6Acluster 1	m6A.gene.cluster.A	High
TCGA.AR.A24O	m6Acluster 2	m6A.gene.cluster.A	High
TCGA.AR.A24P	m6Acluster 1	m6A.gene.cluster.A	High
TCGA.AR.A24Q	m6Acluster 1	m6A.gene.cluster.A	High
TCGA.AR.A24R	m6Acluster 1	m6A.gene.cluster.A	High
TCGA.AR.A24S	m6Acluster 1	m6A.gene.cluster.A	High
TCGA.AR.A24T	m6Acluster 1	m6A.gene.cluster.A	High
TCGA.AR.A24U	m6Acluster 1	m6A.gene.cluster.A	High
TCGA.AR.A24V	m6Acluster 1	m6A.gene.cluster.A	High
TCGA.AR.A24W	m6Acluster 2	m6A.gene.cluster.A	High
TCGA.AR.A24X	m6Acluster 1	m6A.gene.cluster.A	High
TCGA.AR.A24Z	m6Acluster 1	m6A.gene.cluster.A	High
TCGA.AR.A250	m6Acluster 1	m6A.gene.cluster.A	High
TCGA.AR.A251	m6Acluster 1	m6A.gene.cluster.A	High
TCGA.AR.A252	m6Acluster 1	m6A.gene.cluster.A	High
TCGA.AR.A254	m6Acluster 1	m6A.gene.cluster.A	High
TCGA.AR.A255	m6Acluster 1	m6A.gene.cluster.A	High
TCGA.AR.A256	m6Acluster 1	m6A.gene.cluster.A	High
TCGA.AR.A2LE	m6Acluster 1	m6A.gene.cluster.A	High
TCGA.AR.A2LH	m6Acluster 1	m6A.gene.cluster.A	High
TCGA.AR.A2LJ	m6Acluster 1	m6A.gene.cluster.A	High
TCGA.AR.A2LK	m6Acluster 1	m6A.gene.cluster.A	High
TCGA.AR.A2LL	m6Acluster 1	m6A.gene.cluster.A	High
TCGA.AR.A2LM	m6Acluster 1	m6A.gene.cluster.A	High
TCGA.AR.A2LN	m6Acluster 1	m6A.gene.cluster.A	High
TCGA.AR.A2LO	m6Acluster 1	m6A.gene.cluster.A	High
TCGA.AR.A2LQ	m6Acluster 1	m6A.gene.cluster.A	High
TCGA.AR.A2LR	m6Acluster 1	m6A.gene.cluster.A	High
TCGA.AR.A5QM	m6Acluster 1	m6A.gene.cluster.A	High
TCGA.AR.A5QN	m6Acluster 1	m6A.gene.cluster.A	High
TCGA.AR.A5QP	m6Acluster 1	m6A.gene.cluster.A	High
TCGA.AR.A5QQ	m6Acluster 1	m6A.gene.cluster.A	High
TCGA.B6.A0I1	m6Acluster 1	m6A.gene.cluster.A	High
TCGA.B6.A0I2	m6Acluster 1	m6A.gene.cluster.A	High
TCGA.B6.A0I5	m6Acluster 1	m6A.gene.cluster.A	High
TCGA.B6.A0I6	m6Acluster 1	m6A.gene.cluster.A	High
TCGA.B6.A0I8	m6Acluster 1	m6A.gene.cluster.A	High
TCGA.B6.A0I9	m6Acluster 2	m6A.gene.cluster.A	High
TCGA.B6.A0IA	m6Acluster 1	m6A.gene.cluster.A	High
TCGA.B6.A0IB	m6Acluster 1	m6A.gene.cluster.A	High
TCGA.B6.A0IE	m6Acluster 1	m6A.gene.cluster.A	High
TCGA.B6.A0IG	m6Acluster 1	m6A.gene.cluster.A	High
TCGA.B6.A0IH	m6Acluster 1	m6A.gene.cluster.A	High
TCGA.B6.A0IJ	m6Acluster 1	m6A.gene.cluster.A	High
TCGA.B6.A0IK	m6Acluster 1	m6A.gene.cluster.A	High
TCGA.B6.A0IM	m6Acluster 1	m6A.gene.cluster.A	High
TCGA.B6.A0IN	m6Acluster 1	m6A.gene.cluster.A	High
TCGA.B6.A0IO	m6Acluster 2	m6A.gene.cluster.A	High
TCGA.B6.A0IP	m6Acluster 1	m6A.gene.cluster.A	High
TCGA.B6.A0IQ	m6Acluster 1	m6A.gene.cluster.A	High
TCGA.B6.A0RE	m6Acluster 1	m6A.gene.cluster.A	High
TCGA.B6.A0RG	m6Acluster 1	m6A.gene.cluster.A	High
TCGA.B6.A0RH	m6Acluster 1	m6A.gene.cluster.A	High
TCGA.B6.A0RI	m6Acluster 1	m6A.gene.cluster.A	High
TCGA.B6.A0RL	m6Acluster 1	m6A.gene.cluster.A	High
TCGA.B6.A0RM	m6Acluster 1	m6A.gene.cluster.A	High
TCGA.B6.A0RN	m6Acluster 1	m6A.gene.cluster.A	High
TCGA.B6.A0RO	m6Acluster 1	m6A.gene.cluster.A	High
TCGA.B6.A0RP	m6Acluster 1	m6A.gene.cluster.A	High
TCGA.B6.A0RQ	m6Acluster 2	m6A.gene.cluster.A	High
TCGA.B6.A0RS	m6Acluster 1	m6A.gene.cluster.A	High
TCGA.B6.A0RT	m6Acluster 1	m6A.gene.cluster.A	High
TCGA.B6.A0RU	m6Acluster 1	m6A.gene.cluster.A	High
TCGA.B6.A0RV	m6Acluster 1	m6A.gene.cluster.A	High
TCGA.B6.A0WS	m6Acluster 1	m6A.gene.cluster.A	High
TCGA.B6.A0WT	m6Acluster 1	m6A.gene.cluster.A	High
TCGA.B6.A0WV	m6Acluster 1	m6A.gene.cluster.A	High
TCGA.B6.A0WW	m6Acluster 1	m6A.gene.cluster.A	High
TCGA.B6.A0WX	m6Acluster 1	m6A.gene.cluster.A	High
TCGA.B6.A0WY	m6Acluster 2	m6A.gene.cluster.A	High
TCGA.B6.A0WZ	m6Acluster 1	m6A.gene.cluster.A	High
TCGA.B6.A0X0	m6Acluster 1	m6A.gene.cluster.A	High
TCGA.B6.A0X1	m6Acluster 1	m6A.gene.cluster.A	High
TCGA.B6.A0X4	m6Acluster 2	m6A.gene.cluster.A	High
TCGA.B6.A0X5	m6Acluster 1	m6A.gene.cluster.A	High
TCGA.B6.A0X7	m6Acluster 1	m6A.gene.cluster.A	High
TCGA.B6.A1KC	m6Acluster 1	m6A.gene.cluster.A	High
TCGA.B6.A1KF	m6Acluster 2	m6A.gene.cluster.A	High
TCGA.B6.A1KI	m6Acluster 1	m6A.gene.cluster.A	High
TCGA.B6.A1KN	m6Acluster 1	m6A.gene.cluster.A	High
TCGA.B6.A2IU	m6Acluster 1	m6A.gene.cluster.A	High
TCGA.B6.A3ZX	m6Acluster 1	m6A.gene.cluster.A	High
TCGA.B6.A400	m6Acluster 1	m6A.gene.cluster.A	High
TCGA.B6.A401	m6Acluster 1	m6A.gene.cluster.A	High
TCGA.B6.A402	m6Acluster 1	m6A.gene.cluster.A	High
TCGA.B6.A408	m6Acluster 1	m6A.gene.cluster.A	High
TCGA.B6.A409	m6Acluster 1	m6A.gene.cluster.A	High
TCGA.B6.A40B	m6Acluster 1	m6A.gene.cluster.A	High
TCGA.B6.A40C	m6Acluster 1	m6A.gene.cluster.A	High
TCGA.BH.A0AU	m6Acluster 2	m6A.gene.cluster.A	High
TCGA.BH.A0AV	m6Acluster 1	m6A.gene.cluster.A	High
TCGA.BH.A0AW	m6Acluster 1	m6A.gene.cluster.A	High
TCGA.BH.A0AY	m6Acluster 1	m6A.gene.cluster.A	High
TCGA.BH.A0AZ	m6Acluster 2	m6A.gene.cluster.A	High
TCGA.BH.A0B0	m6Acluster 1	m6A.gene.cluster.A	High
TCGA.BH.A0B1	m6Acluster 1	m6A.gene.cluster.A	High
TCGA.BH.A0B3	m6Acluster 1	m6A.gene.cluster.A	High
TCGA.BH.A0B4	m6Acluster 1	m6A.gene.cluster.A	High
TCGA.BH.A0B5	m6Acluster 1	m6A.gene.cluster.A	High
TCGA.BH.A0B6	m6Acluster 1	m6A.gene.cluster.A	High
TCGA.BH.A0B7	m6Acluster 1	m6A.gene.cluster.A	High
TCGA.BH.A0B8	m6Acluster 2	m6A.gene.cluster.A	High
TCGA.BH.A0B9	m6Acluster 1	m6A.gene.cluster.A	High
TCGA.BH.A0BA	m6Acluster 1	m6A.gene.cluster.A	High
TCGA.BH.A0BC	m6Acluster 1	m6A.gene.cluster.A	High
TCGA.BH.A0BD	m6Acluster 1	m6A.gene.cluster.A	High
TCGA.BH.A0BF	m6Acluster 1	m6A.gene.cluster.A	High
TCGA.BH.A0BG	m6Acluster 1	m6A.gene.cluster.A	High
TCGA.BH.A0BJ	m6Acluster 1	m6A.gene.cluster.A	High
TCGA.BH.A0BL	m6Acluster 1	m6A.gene.cluster.A	High
TCGA.BH.A0BM	m6Acluster 1	m6A.gene.cluster.A	High
TCGA.BH.A0BO	m6Acluster 1	m6A.gene.cluster.A	High
TCGA.BH.A0BP	m6Acluster 1	m6A.gene.cluster.A	High
TCGA.BH.A0BQ	m6Acluster 1	m6A.gene.cluster.A	High
TCGA.BH.A0BR	m6Acluster 1	m6A.gene.cluster.A	High
TCGA.BH.A0BS	m6Acluster 1	m6A.gene.cluster.A	High
TCGA.BH.A0BT	m6Acluster 1	m6A.gene.cluster.A	High
TCGA.BH.A0BV	m6Acluster 1	m6A.gene.cluster.A	High
TCGA.BH.A0BW	m6Acluster 1	m6A.gene.cluster.A	High
TCGA.BH.A0BZ	m6Acluster 1	m6A.gene.cluster.A	High
TCGA.BH.A0C0	m6Acluster 1	m6A.gene.cluster.A	High
TCGA.BH.A0C1	m6Acluster 1	m6A.gene.cluster.A	High
TCGA.BH.A0C3	m6Acluster 1	m6A.gene.cluster.A	High
TCGA.BH.A0C7	m6Acluster 2	m6A.gene.cluster.A	High
TCGA.BH.A0DD	m6Acluster 1	m6A.gene.cluster.A	High
TCGA.BH.A0DE	m6Acluster 1	m6A.gene.cluster.A	High
TCGA.BH.A0DG	m6Acluster 1	m6A.gene.cluster.A	High
TCGA.BH.A0DH	m6Acluster 1	m6A.gene.cluster.A	High
TCGA.BH.A0DI	m6Acluster 1	m6A.gene.cluster.A	High
TCGA.BH.A0DK	m6Acluster 1	m6A.gene.cluster.A	High
TCGA.BH.A0DL	m6Acluster 1	m6A.gene.cluster.A	High
TCGA.BH.A0DO	m6Acluster 1	m6A.gene.cluster.A	High
TCGA.BH.A0DP	m6Acluster 1	m6A.gene.cluster.A	High
TCGA.BH.A0DQ	m6Acluster 1	m6A.gene.cluster.A	High
TCGA.BH.A0DS	m6Acluster 1	m6A.gene.cluster.A	High
TCGA.BH.A0DT	m6Acluster 1	m6A.gene.cluster.A	High
TCGA.BH.A0DV	m6Acluster 1	m6A.gene.cluster.A	High
TCGA.BH.A0DX	m6Acluster 1	m6A.gene.cluster.A	High
TCGA.BH.A0DZ	m6Acluster 1	m6A.gene.cluster.A	High
TCGA.BH.A0E0	m6Acluster 1	m6A.gene.cluster.A	High
TCGA.BH.A0E1	m6Acluster 1	m6A.gene.cluster.A	High
TCGA.BH.A0E2	m6Acluster 1	m6A.gene.cluster.A	High
TCGA.BH.A0E6	m6Acluster 1	m6A.gene.cluster.A	High
TCGA.BH.A0E7	m6Acluster 1	m6A.gene.cluster.A	High
TCGA.BH.A0E9	m6Acluster 1	m6A.gene.cluster.A	High
TCGA.BH.A0EA	m6Acluster 1	m6A.gene.cluster.A	High
TCGA.BH.A0EB	m6Acluster 1	m6A.gene.cluster.A	High
TCGA.BH.A0EE	m6Acluster 1	m6A.gene.cluster.A	High
TCGA.BH.A0EI	m6Acluster 1	m6A.gene.cluster.A	High
TCGA.BH.A0GY	m6Acluster 1	m6A.gene.cluster.A	High
TCGA.BH.A0GZ	m6Acluster 1	m6A.gene.cluster.A	High
TCGA.BH.A0H0	m6Acluster 1	m6A.gene.cluster.A	High
TCGA.BH.A0H3	m6Acluster 1	m6A.gene.cluster.A	High
TCGA.BH.A0H5	m6Acluster 1	m6A.gene.cluster.A	High
TCGA.BH.A0H6	m6Acluster 1	m6A.gene.cluster.A	High
TCGA.BH.A0H7	m6Acluster 1	m6A.gene.cluster.A	High
TCGA.BH.A0H9	m6Acluster 1	m6A.gene.cluster.A	High
TCGA.BH.A0HA	m6Acluster 1	m6A.gene.cluster.A	High
TCGA.BH.A0HB	m6Acluster 1	m6A.gene.cluster.A	High
TCGA.BH.A0HF	m6Acluster 2	m6A.gene.cluster.A	High
TCGA.BH.A0HI	m6Acluster 1	m6A.gene.cluster.A	High
TCGA.BH.A0HK	m6Acluster 1	m6A.gene.cluster.A	High
TCGA.BH.A0HL	m6Acluster 1	m6A.gene.cluster.A	High
TCGA.BH.A0HN	m6Acluster 1	m6A.gene.cluster.A	High
TCGA.BH.A0HO	m6Acluster 2	m6A.gene.cluster.A	High
TCGA.BH.A0HP	m6Acluster 1	m6A.gene.cluster.A	High
TCGA.BH.A0HQ	m6Acluster 1	m6A.gene.cluster.A	High
TCGA.BH.A0HU	m6Acluster 1	m6A.gene.cluster.A	High
TCGA.BH.A0HW	m6Acluster 1	m6A.gene.cluster.A	High
TCGA.BH.A0HX	m6Acluster 1	m6A.gene.cluster.A	High
TCGA.BH.A0HY	m6Acluster 1	m6A.gene.cluster.A	High
TCGA.BH.A0RX	m6Acluster 1	m6A.gene.cluster.A	High
TCGA.BH.A0W3	m6Acluster 1	m6A.gene.cluster.A	High
TCGA.BH.A0W4	m6Acluster 2	m6A.gene.cluster.A	High
TCGA.BH.A0W5	m6Acluster 1	m6A.gene.cluster.A	High
TCGA.BH.A0W7	m6Acluster 1	m6A.gene.cluster.A	High
TCGA.BH.A0WA	m6Acluster 1	m6A.gene.cluster.A	High
TCGA.BH.A18F	m6Acluster 1	m6A.gene.cluster.A	High
TCGA.BH.A18G	m6Acluster 1	m6A.gene.cluster.A	High
TCGA.BH.A18H	m6Acluster 1	m6A.gene.cluster.A	High
TCGA.BH.A18I	m6Acluster 1	m6A.gene.cluster.A	High
TCGA.BH.A18J	m6Acluster 1	m6A.gene.cluster.A	High
TCGA.BH.A18K	m6Acluster 1	m6A.gene.cluster.A	High
TCGA.BH.A18L	m6Acluster 1	m6A.gene.cluster.A	High
TCGA.BH.A18M	m6Acluster 1	m6A.gene.cluster.A	High
TCGA.BH.A18N	m6Acluster 1	m6A.gene.cluster.A	High
TCGA.BH.A18P	m6Acluster 1	m6A.gene.cluster.A	High
TCGA.BH.A18Q	m6Acluster 2	m6A.gene.cluster.A	High
TCGA.BH.A18R	m6Acluster 1	m6A.gene.cluster.A	High
TCGA.BH.A18S	m6Acluster 2	m6A.gene.cluster.A	High
TCGA.BH.A18T	m6Acluster 1	m6A.gene.cluster.A	High
TCGA.BH.A18U	m6Acluster 1	m6A.gene.cluster.A	High
TCGA.BH.A18V	m6Acluster 1	m6A.gene.cluster.A	High
TCGA.BH.A1EN	m6Acluster 1	m6A.gene.cluster.A	High
TCGA.BH.A1EO	m6Acluster 1	m6A.gene.cluster.A	High
TCGA.BH.A1ES	m6Acluster 1	m6A.gene.cluster.A	High
TCGA.BH.A1ET	m6Acluster 2	m6A.gene.cluster.A	High
TCGA.BH.A1EU	m6Acluster 1	m6A.gene.cluster.A	High
TCGA.BH.A1EV	m6Acluster 1	m6A.gene.cluster.A	High
TCGA.BH.A1EW	m6Acluster 1	m6A.gene.cluster.A	High
TCGA.BH.A1EX	m6Acluster 2	m6A.gene.cluster.A	High
TCGA.BH.A1EY	m6Acluster 1	m6A.gene.cluster.A	High
TCGA.BH.A1F0	m6Acluster 1	m6A.gene.cluster.A	High
TCGA.BH.A1F2	m6Acluster 1	m6A.gene.cluster.A	High
TCGA.BH.A1F5	m6Acluster 1	m6A.gene.cluster.A	High
TCGA.BH.A1F6	m6Acluster 1	m6A.gene.cluster.A	High
TCGA.BH.A1F8	m6Acluster 2	m6A.gene.cluster.A	High
TCGA.BH.A1FB	m6Acluster 1	m6A.gene.cluster.A	High
TCGA.BH.A1FC	m6Acluster 1	m6A.gene.cluster.A	High
TCGA.BH.A1FD	m6Acluster 1	m6A.gene.cluster.A	High
TCGA.BH.A1FE	m6Acluster 1	m6A.gene.cluster.A	High
TCGA.BH.A1FG	m6Acluster 1	m6A.gene.cluster.A	High
TCGA.BH.A1FH	m6Acluster 2	m6A.gene.cluster.A	High
TCGA.BH.A1FJ	m6Acluster 1	m6A.gene.cluster.A	High
TCGA.BH.A1FL	m6Acluster 1	m6A.gene.cluster.A	High
TCGA.BH.A1FM	m6Acluster 1	m6A.gene.cluster.A	High
TCGA.BH.A1FN	m6Acluster 2	m6A.gene.cluster.A	High
TCGA.BH.A1FR	m6Acluster 1	m6A.gene.cluster.A	High
TCGA.BH.A1FU	m6Acluster 1	m6A.gene.cluster.A	High
TCGA.BH.A201	m6Acluster 1	m6A.gene.cluster.A	High
TCGA.BH.A202	m6Acluster 1	m6A.gene.cluster.A	High
TCGA.BH.A203	m6Acluster 1	m6A.gene.cluster.A	High
TCGA.BH.A204	m6Acluster 1	m6A.gene.cluster.A	High
TCGA.BH.A208	m6Acluster 2	m6A.gene.cluster.A	High
TCGA.BH.A209	m6Acluster 1	m6A.gene.cluster.A	High
TCGA.BH.A28O	m6Acluster 2	m6A.gene.cluster.A	High
TCGA.BH.A28Q	m6Acluster 1	m6A.gene.cluster.A	High
TCGA.BH.A2L8	m6Acluster 1	m6A.gene.cluster.A	High
TCGA.BH.A42T	m6Acluster 1	m6A.gene.cluster.A	High
TCGA.BH.A42U	m6Acluster 1	m6A.gene.cluster.A	High
TCGA.BH.A42V	m6Acluster 1	m6A.gene.cluster.A	High
TCGA.BH.A5IZ	m6Acluster 1	m6A.gene.cluster.A	High
TCGA.BH.A5J0	m6Acluster 1	m6A.gene.cluster.A	High
TCGA.BH.A6R8	m6Acluster 1	m6A.gene.cluster.A	High
TCGA.BH.A6R9	m6Acluster 1	m6A.gene.cluster.A	High
TCGA.BH.A8FY	m6Acluster 1	m6A.gene.cluster.A	High
TCGA.BH.A8FZ	m6Acluster 1	m6A.gene.cluster.A	High
TCGA.BH.A8G0	m6Acluster 1	m6A.gene.cluster.A	High
TCGA.BH.AB28	m6Acluster 1	m6A.gene.cluster.A	High
TCGA.C8.A12L	m6Acluster 1	m6A.gene.cluster.A	High
TCGA.C8.A12M	m6Acluster 1	m6A.gene.cluster.A	High
TCGA.C8.A12N	m6Acluster 1	m6A.gene.cluster.A	High
TCGA.C8.A12O	m6Acluster 1	m6A.gene.cluster.A	High
TCGA.C8.A12P	m6Acluster 1	m6A.gene.cluster.A	High
TCGA.C8.A12Q	m6Acluster 2	m6A.gene.cluster.A	High
TCGA.C8.A12U	m6Acluster 1	m6A.gene.cluster.A	High
TCGA.C8.A12V	m6Acluster 1	m6A.gene.cluster.A	High
TCGA.C8.A12W	m6Acluster 1	m6A.gene.cluster.A	High
TCGA.C8.A12X	m6Acluster 1	m6A.gene.cluster.A	High
TCGA.C8.A12Y	m6Acluster 1	m6A.gene.cluster.A	High
TCGA.C8.A12Z	m6Acluster 1	m6A.gene.cluster.A	High
TCGA.C8.A130	m6Acluster 1	m6A.gene.cluster.A	High
TCGA.C8.A131	m6Acluster 1	m6A.gene.cluster.A	High
TCGA.C8.A132	m6Acluster 1	m6A.gene.cluster.A	High
TCGA.C8.A134	m6Acluster 1	m6A.gene.cluster.A	High
TCGA.C8.A135	m6Acluster 1	m6A.gene.cluster.A	High
TCGA.C8.A137	m6Acluster 1	m6A.gene.cluster.A	High
TCGA.C8.A138	m6Acluster 1	m6A.gene.cluster.A	High
TCGA.C8.A1HE	m6Acluster 1	m6A.gene.cluster.A	High
TCGA.C8.A1HF	m6Acluster 1	m6A.gene.cluster.A	High
TCGA.C8.A1HG	m6Acluster 1	m6A.gene.cluster.A	High
TCGA.C8.A1HI	m6Acluster 1	m6A.gene.cluster.A	High
TCGA.C8.A1HJ	m6Acluster 1	m6A.gene.cluster.A	High
TCGA.C8.A1HK	m6Acluster 1	m6A.gene.cluster.A	High
TCGA.C8.A1HL	m6Acluster 1	m6A.gene.cluster.A	High
TCGA.C8.A1HM	m6Acluster 1	m6A.gene.cluster.A	High
TCGA.C8.A1HN	m6Acluster 1	m6A.gene.cluster.A	High
TCGA.C8.A1HO	m6Acluster 1	m6A.gene.cluster.A	High
TCGA.C8.A26V	m6Acluster 2	m6A.gene.cluster.A	High
TCGA.C8.A26W	m6Acluster 1	m6A.gene.cluster.A	High
TCGA.C8.A26X	m6Acluster 1	m6A.gene.cluster.A	High
TCGA.C8.A26Z	m6Acluster 1	m6A.gene.cluster.A	High
TCGA.C8.A273	m6Acluster 1	m6A.gene.cluster.A	High
TCGA.C8.A274	m6Acluster 1	m6A.gene.cluster.A	High
TCGA.C8.A275	m6Acluster 1	m6A.gene.cluster.A	High
TCGA.C8.A278	m6Acluster 1	m6A.gene.cluster.A	High
TCGA.C8.A27A	m6Acluster 1	m6A.gene.cluster.A	High
TCGA.C8.A27B	m6Acluster 1	m6A.gene.cluster.A	High
TCGA.C8.A3M7	m6Acluster 1	m6A.gene.cluster.A	High
TCGA.C8.A3M8	m6Acluster 1	m6A.gene.cluster.A	High
TCGA.C8.A8HP	m6Acluster 1	m6A.gene.cluster.A	High
TCGA.C8.A8HQ	m6Acluster 1	m6A.gene.cluster.A	High
TCGA.C8.A8HR	m6Acluster 1	m6A.gene.cluster.A	High
TCGA.D8.A13Y	m6Acluster 1	m6A.gene.cluster.A	High
TCGA.D8.A13Z	m6Acluster 1	m6A.gene.cluster.A	High
TCGA.D8.A140	m6Acluster 1	m6A.gene.cluster.A	High
TCGA.D8.A141	m6Acluster 1	m6A.gene.cluster.A	High
TCGA.D8.A142	m6Acluster 1	m6A.gene.cluster.A	High
TCGA.D8.A143	m6Acluster 2	m6A.gene.cluster.A	High
TCGA.D8.A145	m6Acluster 1	m6A.gene.cluster.A	High
TCGA.D8.A146	m6Acluster 2	m6A.gene.cluster.A	High
TCGA.D8.A147	m6Acluster 1	m6A.gene.cluster.A	High
TCGA.D8.A1J8	m6Acluster 1	m6A.gene.cluster.A	High
TCGA.D8.A1J9	m6Acluster 1	m6A.gene.cluster.A	High
TCGA.D8.A1JA	m6Acluster 1	m6A.gene.cluster.A	High
TCGA.D8.A1JB	m6Acluster 2	m6A.gene.cluster.A	High
TCGA.D8.A1JC	m6Acluster 1	m6A.gene.cluster.A	High
TCGA.D8.A1JD	m6Acluster 1	m6A.gene.cluster.A	High
TCGA.D8.A1JE	m6Acluster 2	m6A.gene.cluster.A	High
TCGA.D8.A1JF	m6Acluster 1	m6A.gene.cluster.A	High
TCGA.D8.A1JG	m6Acluster 1	m6A.gene.cluster.A	High
TCGA.D8.A1JH	m6Acluster 2	m6A.gene.cluster.A	High
TCGA.D8.A1JI	m6Acluster 1	m6A.gene.cluster.A	High
TCGA.D8.A1JJ	m6Acluster 1	m6A.gene.cluster.A	High
TCGA.D8.A1JL	m6Acluster 1	m6A.gene.cluster.A	High
TCGA.D8.A1JM	m6Acluster 1	m6A.gene.cluster.A	High
TCGA.D8.A1JN	m6Acluster 1	m6A.gene.cluster.A	High
TCGA.D8.A1JP	m6Acluster 1	m6A.gene.cluster.A	High
TCGA.D8.A1JS	m6Acluster 1	m6A.gene.cluster.A	High
TCGA.D8.A1JT	m6Acluster 1	m6A.gene.cluster.A	High
TCGA.D8.A1JU	m6Acluster 1	m6A.gene.cluster.A	High
TCGA.D8.A1X5	m6Acluster 1	m6A.gene.cluster.A	High
TCGA.D8.A1X6	m6Acluster 1	m6A.gene.cluster.A	High
TCGA.D8.A1X7	m6Acluster 1	m6A.gene.cluster.A	High
TCGA.D8.A1X8	m6Acluster 1	m6A.gene.cluster.A	High
TCGA.D8.A1X9	m6Acluster 1	m6A.gene.cluster.A	High
TCGA.D8.A1XA	m6Acluster 2	m6A.gene.cluster.A	High
TCGA.D8.A1XB	m6Acluster 1	m6A.gene.cluster.A	High
TCGA.D8.A1XC	m6Acluster 2	m6A.gene.cluster.A	High
TCGA.D8.A1XD	m6Acluster 2	m6A.gene.cluster.A	High
TCGA.D8.A1XF	m6Acluster 1	m6A.gene.cluster.A	High
TCGA.D8.A1XG	m6Acluster 1	m6A.gene.cluster.A	High
TCGA.D8.A1XJ	m6Acluster 1	m6A.gene.cluster.A	High
TCGA.D8.A1XK	m6Acluster 1	m6A.gene.cluster.A	High
TCGA.D8.A1XL	m6Acluster 1	m6A.gene.cluster.A	High
TCGA.D8.A1XM	m6Acluster 1	m6A.gene.cluster.A	High
TCGA.D8.A1XO	m6Acluster 1	m6A.gene.cluster.A	High
TCGA.D8.A1XQ	m6Acluster 1	m6A.gene.cluster.A	High
TCGA.D8.A1XR	m6Acluster 1	m6A.gene.cluster.A	High
TCGA.D8.A1XS	m6Acluster 1	m6A.gene.cluster.A	High
TCGA.D8.A1XT	m6Acluster 1	m6A.gene.cluster.A	High
TCGA.D8.A1XU	m6Acluster 1	m6A.gene.cluster.A	High
TCGA.D8.A1XV	m6Acluster 2	m6A.gene.cluster.A	High
TCGA.D8.A1XW	m6Acluster 1	m6A.gene.cluster.A	High
TCGA.D8.A1XY	m6Acluster 1	m6A.gene.cluster.A	High
TCGA.D8.A1XZ	m6Acluster 1	m6A.gene.cluster.A	High
TCGA.D8.A1Y0	m6Acluster 1	m6A.gene.cluster.A	High
TCGA.D8.A1Y1	m6Acluster 1	m6A.gene.cluster.A	High
TCGA.D8.A1Y2	m6Acluster 1	m6A.gene.cluster.A	High
TCGA.D8.A1Y3	m6Acluster 1	m6A.gene.cluster.A	High
TCGA.D8.A27E	m6Acluster 2	m6A.gene.cluster.A	High
TCGA.D8.A27F	m6Acluster 1	m6A.gene.cluster.A	High
TCGA.D8.A27G	m6Acluster 2	m6A.gene.cluster.A	High
TCGA.D8.A27H	m6Acluster 1	m6A.gene.cluster.A	High
TCGA.D8.A27I	m6Acluster 1	m6A.gene.cluster.A	High
TCGA.D8.A27K	m6Acluster 1	m6A.gene.cluster.A	High
TCGA.D8.A27L	m6Acluster 1	m6A.gene.cluster.A	High
TCGA.D8.A27M	m6Acluster 1	m6A.gene.cluster.A	High
TCGA.D8.A27N	m6Acluster 1	m6A.gene.cluster.A	High
TCGA.D8.A27P	m6Acluster 2	m6A.gene.cluster.A	High
TCGA.D8.A27R	m6Acluster 1	m6A.gene.cluster.A	High
TCGA.D8.A27T	m6Acluster 1	m6A.gene.cluster.A	High
TCGA.D8.A27V	m6Acluster 1	m6A.gene.cluster.A	High
TCGA.D8.A27W	m6Acluster 1	m6A.gene.cluster.A	High
TCGA.D8.A3Z5	m6Acluster 1	m6A.gene.cluster.A	High
TCGA.D8.A3Z6	m6Acluster 1	m6A.gene.cluster.A	High
TCGA.D8.A4Z1	m6Acluster 2	m6A.gene.cluster.A	High
TCGA.D8.A73U	m6Acluster 1	m6A.gene.cluster.A	High
TCGA.D8.A73W	m6Acluster 1	m6A.gene.cluster.A	High
TCGA.D8.A73X	m6Acluster 1	m6A.gene.cluster.A	High
TCGA.E2.A105	m6Acluster 1	m6A.gene.cluster.A	High
TCGA.E2.A106	m6Acluster 1	m6A.gene.cluster.A	High
TCGA.E2.A107	m6Acluster 1	m6A.gene.cluster.A	High
TCGA.E2.A108	m6Acluster 1	m6A.gene.cluster.A	High
TCGA.E2.A109	m6Acluster 1	m6A.gene.cluster.A	High
TCGA.E2.A10A	m6Acluster 1	m6A.gene.cluster.A	High
TCGA.E2.A10B	m6Acluster 1	m6A.gene.cluster.A	High
TCGA.E2.A10C	m6Acluster 1	m6A.gene.cluster.A	High
TCGA.E2.A10E	m6Acluster 1	m6A.gene.cluster.A	High
TCGA.E2.A10F	m6Acluster 1	m6A.gene.cluster.A	High
TCGA.E2.A14N	m6Acluster 1	m6A.gene.cluster.A	High
TCGA.E2.A14O	m6Acluster 2	m6A.gene.cluster.A	High
TCGA.E2.A14P	m6Acluster 1	m6A.gene.cluster.A	High
TCGA.E2.A14Q	m6Acluster 1	m6A.gene.cluster.A	High
TCGA.E2.A14R	m6Acluster 1	m6A.gene.cluster.A	High
TCGA.E2.A14S	m6Acluster 1	m6A.gene.cluster.A	High
TCGA.E2.A14T	m6Acluster 1	m6A.gene.cluster.A	High
TCGA.E2.A14U	m6Acluster 2	m6A.gene.cluster.A	High
TCGA.E2.A14V	m6Acluster 1	m6A.gene.cluster.A	High
TCGA.E2.A14W	m6Acluster 1	m6A.gene.cluster.A	High
TCGA.E2.A14X	m6Acluster 1	m6A.gene.cluster.A	High
TCGA.E2.A14Y	m6Acluster 1	m6A.gene.cluster.A	High
TCGA.E2.A14Z	m6Acluster 1	m6A.gene.cluster.A	High
TCGA.E2.A150	m6Acluster 2	m6A.gene.cluster.A	High
TCGA.E2.A152	m6Acluster 1	m6A.gene.cluster.A	High
TCGA.E2.A153	m6Acluster 1	m6A.gene.cluster.A	High
TCGA.E2.A154	m6Acluster 1	m6A.gene.cluster.A	High
TCGA.E2.A155	m6Acluster 1	m6A.gene.cluster.A	High
TCGA.E2.A156	m6Acluster 1	m6A.gene.cluster.A	High
TCGA.E2.A158	m6Acluster 1	m6A.gene.cluster.A	High
TCGA.E2.A159	m6Acluster 1	m6A.gene.cluster.A	High
TCGA.E2.A15A	m6Acluster 1	m6A.gene.cluster.A	High
TCGA.E2.A15C	m6Acluster 1	m6A.gene.cluster.A	High
TCGA.E2.A15D	m6Acluster 1	m6A.gene.cluster.A	High
TCGA.E2.A15E	m6Acluster 1	m6A.gene.cluster.A	High
TCGA.E2.A15F	m6Acluster 2	m6A.gene.cluster.A	High
TCGA.E2.A15G	m6Acluster 1	m6A.gene.cluster.A	High
TCGA.E2.A15H	m6Acluster 1	m6A.gene.cluster.A	High
TCGA.E2.A15I	m6Acluster 1	m6A.gene.cluster.A	High
TCGA.E2.A15J	m6Acluster 1	m6A.gene.cluster.A	High
TCGA.E2.A15K	m6Acluster 1	m6A.gene.cluster.A	High
TCGA.E2.A15L	m6Acluster 1	m6A.gene.cluster.A	High
TCGA.E2.A15M	m6Acluster 1	m6A.gene.cluster.A	High
TCGA.E2.A15O	m6Acluster 1	m6A.gene.cluster.A	High
TCGA.E2.A15P	m6Acluster 1	m6A.gene.cluster.A	High
TCGA.E2.A15R	m6Acluster 1	m6A.gene.cluster.A	High
TCGA.E2.A15S	m6Acluster 1	m6A.gene.cluster.A	High
TCGA.E2.A15T	m6Acluster 1	m6A.gene.cluster.A	High
TCGA.E2.A1AZ	m6Acluster 1	m6A.gene.cluster.A	High
TCGA.E2.A1B0	m6Acluster 1	m6A.gene.cluster.A	High
TCGA.E2.A1B1	m6Acluster 1	m6A.gene.cluster.A	High
TCGA.E2.A1B4	m6Acluster 1	m6A.gene.cluster.A	High
TCGA.E2.A1B5	m6Acluster 1	m6A.gene.cluster.A	High
TCGA.E2.A1B6	m6Acluster 1	m6A.gene.cluster.A	High
TCGA.E2.A1BC	m6Acluster 1	m6A.gene.cluster.A	High
TCGA.E2.A1BD	m6Acluster 1	m6A.gene.cluster.A	High
TCGA.E2.A1IE	m6Acluster 1	m6A.gene.cluster.A	High
TCGA.E2.A1IF	m6Acluster 1	m6A.gene.cluster.A	High
TCGA.E2.A1IG	m6Acluster 1	m6A.gene.cluster.A	High
TCGA.E2.A1IH	m6Acluster 1	m6A.gene.cluster.A	High
TCGA.E2.A1II	m6Acluster 1	m6A.gene.cluster.A	High
TCGA.E2.A1IJ	m6Acluster 1	m6A.gene.cluster.A	High
TCGA.E2.A1IK	m6Acluster 1	m6A.gene.cluster.A	High
TCGA.E2.A1IL	m6Acluster 1	m6A.gene.cluster.A	High
TCGA.E2.A1IN	m6Acluster 1	m6A.gene.cluster.A	High
TCGA.E2.A1IO	m6Acluster 1	m6A.gene.cluster.A	High
TCGA.E2.A1IU	m6Acluster 2	m6A.gene.cluster.A	High
TCGA.E2.A1L6	m6Acluster 2	m6A.gene.cluster.A	High
TCGA.E2.A1L7	m6Acluster 1	m6A.gene.cluster.A	High
TCGA.E2.A1L8	m6Acluster 1	m6A.gene.cluster.A	High
TCGA.E2.A1L9	m6Acluster 1	m6A.gene.cluster.A	High
TCGA.E2.A1LA	m6Acluster 1	m6A.gene.cluster.A	High
TCGA.E2.A1LB	m6Acluster 2	m6A.gene.cluster.A	High
TCGA.E2.A1LE	m6Acluster 1	m6A.gene.cluster.A	High
TCGA.E2.A1LG	m6Acluster 1	m6A.gene.cluster.A	High
TCGA.E2.A1LH	m6Acluster 1	m6A.gene.cluster.A	High
TCGA.E2.A1LI	m6Acluster 1	m6A.gene.cluster.A	High
TCGA.E2.A1LK	m6Acluster 1	m6A.gene.cluster.A	High
TCGA.E2.A1LL	m6Acluster 1	m6A.gene.cluster.A	High
TCGA.E2.A1LS	m6Acluster 1	m6A.gene.cluster.A	High
TCGA.E2.A2P5	m6Acluster 1	m6A.gene.cluster.A	High
TCGA.E2.A2P6	m6Acluster 1	m6A.gene.cluster.A	High
TCGA.E2.A3DX	m6Acluster 2	m6A.gene.cluster.A	High
TCGA.E2.A56Z	m6Acluster 1	m6A.gene.cluster.A	High
TCGA.E2.A570	m6Acluster 1	m6A.gene.cluster.A	High
TCGA.E2.A572	m6Acluster 1	m6A.gene.cluster.A	High
TCGA.E2.A573	m6Acluster 1	m6A.gene.cluster.A	High
TCGA.E2.A574	m6Acluster 1	m6A.gene.cluster.A	High
TCGA.E2.A576	m6Acluster 1	m6A.gene.cluster.A	High
TCGA.E9.A1N3	m6Acluster 2	m6A.gene.cluster.A	High
TCGA.E9.A1N4	m6Acluster 1	m6A.gene.cluster.A	High
TCGA.E9.A1N5	m6Acluster 1	m6A.gene.cluster.A	High
TCGA.E9.A1N6	m6Acluster 1	m6A.gene.cluster.A	High
TCGA.E9.A1N8	m6Acluster 1	m6A.gene.cluster.A	High
TCGA.E9.A1N9	m6Acluster 1	m6A.gene.cluster.A	High
TCGA.E9.A1NA	m6Acluster 1	m6A.gene.cluster.A	High
TCGA.E9.A1NC	m6Acluster 1	m6A.gene.cluster.A	High
TCGA.E9.A1ND	m6Acluster 1	m6A.gene.cluster.A	High
TCGA.E9.A1NE	m6Acluster 1	m6A.gene.cluster.A	High
TCGA.E9.A1NF	m6Acluster 1	m6A.gene.cluster.A	High
TCGA.E9.A1NG	m6Acluster 1	m6A.gene.cluster.A	High
TCGA.E9.A1NH	m6Acluster 1	m6A.gene.cluster.A	High
TCGA.E9.A1NI	m6Acluster 1	m6A.gene.cluster.A	High
TCGA.E9.A1QZ	m6Acluster 1	m6A.gene.cluster.A	High
TCGA.E9.A1R0	m6Acluster 1	m6A.gene.cluster.A	High
TCGA.E9.A1R2	m6Acluster 1	m6A.gene.cluster.A	High
TCGA.E9.A1R3	m6Acluster 1	m6A.gene.cluster.A	High
TCGA.E9.A1R4	m6Acluster 1	m6A.gene.cluster.A	High
TCGA.E9.A1R5	m6Acluster 1	m6A.gene.cluster.A	High
TCGA.E9.A1R6	m6Acluster 1	m6A.gene.cluster.A	High
TCGA.E9.A1R7	m6Acluster 1	m6A.gene.cluster.A	High
TCGA.E9.A1RA	m6Acluster 1	m6A.gene.cluster.A	High
TCGA.E9.A1RB	m6Acluster 1	m6A.gene.cluster.A	High
TCGA.E9.A1RC	m6Acluster 1	m6A.gene.cluster.A	High
TCGA.E9.A1RD	m6Acluster 1	m6A.gene.cluster.A	High
TCGA.E9.A1RE	m6Acluster 1	m6A.gene.cluster.A	High
TCGA.E9.A1RF	m6Acluster 1	m6A.gene.cluster.A	High
TCGA.E9.A1RG	m6Acluster 1	m6A.gene.cluster.A	High
TCGA.E9.A1RH	m6Acluster 1	m6A.gene.cluster.A	High
TCGA.E9.A1RI	m6Acluster 1	m6A.gene.cluster.A	High
TCGA.E9.A226	m6Acluster 1	m6A.gene.cluster.A	High
TCGA.E9.A227	m6Acluster 1	m6A.gene.cluster.A	High
TCGA.E9.A228	m6Acluster 1	m6A.gene.cluster.A	High
TCGA.E9.A229	m6Acluster 1	m6A.gene.cluster.A	High
TCGA.E9.A22A	m6Acluster 1	m6A.gene.cluster.A	High
TCGA.E9.A22B	m6Acluster 1	m6A.gene.cluster.A	High
TCGA.E9.A22D	m6Acluster 1	m6A.gene.cluster.A	High
TCGA.E9.A22E	m6Acluster 1	m6A.gene.cluster.A	High
TCGA.E9.A22G	m6Acluster 1	m6A.gene.cluster.A	High
TCGA.E9.A22H	m6Acluster 1	m6A.gene.cluster.A	High
TCGA.E9.A243	m6Acluster 1	m6A.gene.cluster.A	High
TCGA.E9.A244	m6Acluster 1	m6A.gene.cluster.A	High
TCGA.E9.A245	m6Acluster 2	m6A.gene.cluster.A	High
TCGA.E9.A247	m6Acluster 1	m6A.gene.cluster.A	High
TCGA.E9.A248	m6Acluster 1	m6A.gene.cluster.A	High
TCGA.E9.A249	m6Acluster 1	m6A.gene.cluster.A	High
TCGA.E9.A24A	m6Acluster 1	m6A.gene.cluster.A	High
TCGA.E9.A295	m6Acluster 1	m6A.gene.cluster.A	High
TCGA.E9.A2JS	m6Acluster 1	m6A.gene.cluster.A	High
TCGA.E9.A2JT	m6Acluster 1	m6A.gene.cluster.A	High
TCGA.E9.A3HO	m6Acluster 1	m6A.gene.cluster.A	High
TCGA.E9.A3Q9	m6Acluster 2	m6A.gene.cluster.A	High
TCGA.E9.A3QA	m6Acluster 1	m6A.gene.cluster.A	High
TCGA.E9.A3X8	m6Acluster 1	m6A.gene.cluster.A	High
TCGA.E9.A54X	m6Acluster 1	m6A.gene.cluster.A	High
TCGA.E9.A54Y	m6Acluster 1	m6A.gene.cluster.A	High
TCGA.E9.A5FK	m6Acluster 1	m6A.gene.cluster.A	High
TCGA.E9.A5FL	m6Acluster 1	m6A.gene.cluster.A	High
TCGA.E9.A5UO	m6Acluster 2	m6A.gene.cluster.A	High
TCGA.E9.A5UP	m6Acluster 1	m6A.gene.cluster.A	High
TCGA.E9.A6HE	m6Acluster 1	m6A.gene.cluster.A	High
TCGA.EW.A1IW	m6Acluster 1	m6A.gene.cluster.A	High
TCGA.EW.A1IX	m6Acluster 1	m6A.gene.cluster.A	High
TCGA.EW.A1IY	m6Acluster 1	m6A.gene.cluster.A	High
TCGA.EW.A1IZ	m6Acluster 1	m6A.gene.cluster.A	High
TCGA.EW.A1J1	m6Acluster 2	m6A.gene.cluster.A	High
TCGA.EW.A1J2	m6Acluster 1	m6A.gene.cluster.A	High
TCGA.EW.A1J3	m6Acluster 1	m6A.gene.cluster.A	High
TCGA.EW.A1J5	m6Acluster 1	m6A.gene.cluster.A	High
TCGA.EW.A1J6	m6Acluster 2	m6A.gene.cluster.A	High
TCGA.EW.A1OV	m6Acluster 1	m6A.gene.cluster.A	High
TCGA.EW.A1OW	m6Acluster 1	m6A.gene.cluster.A	High
TCGA.EW.A1OX	m6Acluster 1	m6A.gene.cluster.A	High
TCGA.EW.A1OY	m6Acluster 1	m6A.gene.cluster.A	High
TCGA.EW.A1OZ	m6Acluster 1	m6A.gene.cluster.A	High
TCGA.EW.A1P0	m6Acluster 1	m6A.gene.cluster.A	High
TCGA.EW.A1P1	m6Acluster 1	m6A.gene.cluster.A	High
TCGA.EW.A1P3	m6Acluster 1	m6A.gene.cluster.A	High
TCGA.EW.A1P4	m6Acluster 1	m6A.gene.cluster.A	High
TCGA.EW.A1P5	m6Acluster 1	m6A.gene.cluster.A	High
TCGA.EW.A1P6	m6Acluster 1	m6A.gene.cluster.A	High
TCGA.EW.A1P7	m6Acluster 1	m6A.gene.cluster.A	High
TCGA.EW.A1P8	m6Acluster 1	m6A.gene.cluster.A	High
TCGA.EW.A1PA	m6Acluster 1	m6A.gene.cluster.A	High
TCGA.EW.A1PB	m6Acluster 1	m6A.gene.cluster.A	High
TCGA.EW.A1PC	m6Acluster 1	m6A.gene.cluster.A	High
TCGA.EW.A1PD	m6Acluster 1	m6A.gene.cluster.A	High
TCGA.EW.A1PE	m6Acluster 1	m6A.gene.cluster.A	High
TCGA.EW.A1PF	m6Acluster 1	m6A.gene.cluster.A	High
TCGA.EW.A1PG	m6Acluster 1	m6A.gene.cluster.A	High
TCGA.EW.A1PH	m6Acluster 1	m6A.gene.cluster.A	High
TCGA.EW.A2FR	m6Acluster 1	m6A.gene.cluster.A	High
TCGA.EW.A2FS	m6Acluster 1	m6A.gene.cluster.A	High
TCGA.EW.A2FV	m6Acluster 1	m6A.gene.cluster.A	High
TCGA.EW.A2FW	m6Acluster 1	m6A.gene.cluster.A	High
TCGA.EW.A3E8	m6Acluster 1	m6A.gene.cluster.A	High
TCGA.EW.A3U0	m6Acluster 1	m6A.gene.cluster.A	High
TCGA.EW.A423	m6Acluster 1	m6A.gene.cluster.A	High
TCGA.EW.A424	m6Acluster 1	m6A.gene.cluster.A	High
TCGA.EW.A6S9	m6Acluster 1	m6A.gene.cluster.A	High
TCGA.EW.A6SA	m6Acluster 1	m6A.gene.cluster.A	High
TCGA.EW.A6SB	m6Acluster 1	m6A.gene.cluster.A	High
TCGA.EW.A6SC	m6Acluster 1	m6A.gene.cluster.A	High
TCGA.EW.A6SD	m6Acluster 1	m6A.gene.cluster.A	High
TCGA.GI.A2C8	m6Acluster 1	m6A.gene.cluster.A	High
TCGA.GI.A2C9	m6Acluster 1	m6A.gene.cluster.A	High
TCGA.GM.A2D9	m6Acluster 1	m6A.gene.cluster.A	High
TCGA.GM.A2DA	m6Acluster 1	m6A.gene.cluster.A	High
TCGA.GM.A2DB	m6Acluster 1	m6A.gene.cluster.A	High
TCGA.GM.A2DC	m6Acluster 1	m6A.gene.cluster.A	High
TCGA.GM.A2DD	m6Acluster 1	m6A.gene.cluster.A	High
TCGA.GM.A2DF	m6Acluster 1	m6A.gene.cluster.A	High
TCGA.GM.A2DH	m6Acluster 1	m6A.gene.cluster.A	High
TCGA.GM.A2DI	m6Acluster 1	m6A.gene.cluster.A	High
TCGA.GM.A2DK	m6Acluster 1	m6A.gene.cluster.A	High
TCGA.GM.A2DL	m6Acluster 1	m6A.gene.cluster.A	High
TCGA.GM.A2DM	m6Acluster 2	m6A.gene.cluster.A	High
TCGA.GM.A2DN	m6Acluster 1	m6A.gene.cluster.A	High
TCGA.GM.A2DO	m6Acluster 1	m6A.gene.cluster.A	High
TCGA.GM.A3NW	m6Acluster 1	m6A.gene.cluster.A	High
TCGA.GM.A3NY	m6Acluster 1	m6A.gene.cluster.A	High
TCGA.GM.A3XG	m6Acluster 2	m6A.gene.cluster.A	High
TCGA.GM.A3XL	m6Acluster 1	m6A.gene.cluster.A	High
TCGA.GM.A3XN	m6Acluster 1	m6A.gene.cluster.A	High
TCGA.GM.A4E0	m6Acluster 1	m6A.gene.cluster.A	High
TCGA.GM.A5PV	m6Acluster 1	m6A.gene.cluster.A	High
TCGA.GM.A5PX	m6Acluster 1	m6A.gene.cluster.A	High
TCGA.HN.A2NL	m6Acluster 1	m6A.gene.cluster.A	High
TCGA.HN.A2OB	m6Acluster 1	m6A.gene.cluster.A	High
TCGA.JL.A3YW	m6Acluster 1	m6A.gene.cluster.A	High
TCGA.JL.A3YX	m6Acluster 1	m6A.gene.cluster.A	High
TCGA.LD.A66U	m6Acluster 1	m6A.gene.cluster.A	High
TCGA.LD.A74U	m6Acluster 1	m6A.gene.cluster.A	High
TCGA.LD.A7W5	m6Acluster 1	m6A.gene.cluster.A	High
TCGA.LD.A7W6	m6Acluster 1	m6A.gene.cluster.A	High
TCGA.LD.A9QF	m6Acluster 1	m6A.gene.cluster.A	High
TCGA.LL.A440	m6Acluster 2	m6A.gene.cluster.A	High
TCGA.LL.A441	m6Acluster 1	m6A.gene.cluster.A	High
TCGA.LL.A442	m6Acluster 1	m6A.gene.cluster.A	High
TCGA.LL.A50Y	m6Acluster 1	m6A.gene.cluster.A	High
TCGA.LL.A5YL	m6Acluster 1	m6A.gene.cluster.A	High
TCGA.LL.A5YM	m6Acluster 1	m6A.gene.cluster.A	High
TCGA.LL.A5YN	m6Acluster 1	m6A.gene.cluster.A	High
TCGA.LL.A5YO	m6Acluster 1	m6A.gene.cluster.A	High
TCGA.LL.A5YP	m6Acluster 2	m6A.gene.cluster.A	High
TCGA.LL.A6FQ	m6Acluster 1	m6A.gene.cluster.A	High
TCGA.LL.A6FR	m6Acluster 1	m6A.gene.cluster.A	High
TCGA.LL.A73Y	m6Acluster 1	m6A.gene.cluster.A	High
TCGA.LL.A73Z	m6Acluster 1	m6A.gene.cluster.A	High
TCGA.LL.A740	m6Acluster 1	m6A.gene.cluster.A	High
TCGA.LL.A7SZ	m6Acluster 1	m6A.gene.cluster.A	High
TCGA.LL.A7T0	m6Acluster 1	m6A.gene.cluster.A	High
TCGA.LL.A8F5	m6Acluster 1	m6A.gene.cluster.A	High
TCGA.LL.A9Q3	m6Acluster 2	m6A.gene.cluster.A	High
TCGA.LQ.A4E4	m6Acluster 1	m6A.gene.cluster.A	High
TCGA.MS.A51U	m6Acluster 2	m6A.gene.cluster.A	High
TCGA.OK.A5Q2	m6Acluster 1	m6A.gene.cluster.A	High
TCGA.OL.A5D6	m6Acluster 1	m6A.gene.cluster.A	High
TCGA.OL.A5D7	m6Acluster 1	m6A.gene.cluster.A	High
TCGA.OL.A5D8	m6Acluster 1	m6A.gene.cluster.A	High
TCGA.OL.A5DA	m6Acluster 1	m6A.gene.cluster.A	High
TCGA.OL.A5RU	m6Acluster 2	m6A.gene.cluster.A	High
TCGA.OL.A5RV	m6Acluster 1	m6A.gene.cluster.A	High
TCGA.OL.A5RW	m6Acluster 1	m6A.gene.cluster.A	High
TCGA.OL.A5RX	m6Acluster 1	m6A.gene.cluster.A	High
TCGA.OL.A5RY	m6Acluster 1	m6A.gene.cluster.A	High
TCGA.OL.A5RZ	m6Acluster 1	m6A.gene.cluster.A	High
TCGA.OL.A5S0	m6Acluster 1	m6A.gene.cluster.A	High
TCGA.OL.A66H	m6Acluster 2	m6A.gene.cluster.A	High
TCGA.OL.A66I	m6Acluster 1	m6A.gene.cluster.A	High
TCGA.OL.A66J	m6Acluster 1	m6A.gene.cluster.A	High
TCGA.OL.A66K	m6Acluster 1	m6A.gene.cluster.A	High
TCGA.OL.A66L	m6Acluster 1	m6A.gene.cluster.A	High
TCGA.OL.A66N	m6Acluster 1	m6A.gene.cluster.A	High
TCGA.OL.A66O	m6Acluster 1	m6A.gene.cluster.A	High
TCGA.OL.A66P	m6Acluster 1	m6A.gene.cluster.A	High
TCGA.OL.A6VO	m6Acluster 1	m6A.gene.cluster.A	High
TCGA.OL.A6VQ	m6Acluster 1	m6A.gene.cluster.A	High
TCGA.OL.A6VR	m6Acluster 1	m6A.gene.cluster.A	High
TCGA.OL.A97C	m6Acluster 2	m6A.gene.cluster.A	High
TCGA.PE.A5DC	m6Acluster 1	m6A.gene.cluster.A	High
TCGA.PE.A5DD	m6Acluster 1	m6A.gene.cluster.A	High
TCGA.PE.A5DE	m6Acluster 1	m6A.gene.cluster.A	High
TCGA.PL.A8LX	m6Acluster 1	m6A.gene.cluster.A	High
TCGA.PL.A8LY	m6Acluster 2	m6A.gene.cluster.A	High
TCGA.PL.A8LZ	m6Acluster 1	m6A.gene.cluster.A	High
TCGA.S3.A6ZF	m6Acluster 1	m6A.gene.cluster.A	High
TCGA.S3.A6ZG	m6Acluster 1	m6A.gene.cluster.A	High
TCGA.S3.A6ZH	m6Acluster 1	m6A.gene.cluster.A	High
TCGA.S3.AA0Z	m6Acluster 1	m6A.gene.cluster.A	High
TCGA.S3.AA10	m6Acluster 1	m6A.gene.cluster.A	High
TCGA.S3.AA11	m6Acluster 1	m6A.gene.cluster.A	High
TCGA.S3.AA12	m6Acluster 2	m6A.gene.cluster.A	High
TCGA.S3.AA14	m6Acluster 2	m6A.gene.cluster.A	High
TCGA.S3.AA15	m6Acluster 1	m6A.gene.cluster.A	High
TCGA.S3.AA17	m6Acluster 1	m6A.gene.cluster.A	High
TCGA.UL.AAZ6	m6Acluster 1	m6A.gene.cluster.A	High
TCGA.UU.A93S	m6Acluster 1	m6A.gene.cluster.A	High
TCGA.V7.A7HQ	m6Acluster 1	m6A.gene.cluster.A	High
TCGA.W8.A86G	m6Acluster 1	m6A.gene.cluster.A	High
TCGA.WT.AB41	m6Acluster 1	m6A.gene.cluster.A	High
TCGA.WT.AB44	m6Acluster 1	m6A.gene.cluster.A	High
TCGA.XX.A899	m6Acluster 1	m6A.gene.cluster.A	High
TCGA.XX.A89A	m6Acluster 1	m6A.gene.cluster.A	High
TCGA.Z7.A8R5	m6Acluster 1	m6A.gene.cluster.A	High
TCGA.Z7.A8R6	m6Acluster 1	m6A.gene.cluster.A	High
TCGA.2W.A8YY	m6Acluster 1	m6A.gene.cluster.A	High
TCGA.4J.AA1J	m6Acluster 1	m6A.gene.cluster.A	High
TCGA.BI.A0VR	m6Acluster 1	m6A.gene.cluster.A	High
TCGA.BI.A0VS	m6Acluster 1	m6A.gene.cluster.A	High
TCGA.BI.A20A	m6Acluster 1	m6A.gene.cluster.A	High
TCGA.C5.A0TN	m6Acluster 1	m6A.gene.cluster.A	High
TCGA.C5.A1BE	m6Acluster 1	m6A.gene.cluster.A	High
TCGA.C5.A1BF	m6Acluster 1	m6A.gene.cluster.A	High
TCGA.C5.A1BI	m6Acluster 1	m6A.gene.cluster.A	High
TCGA.C5.A1BJ	m6Acluster 1	m6A.gene.cluster.A	High
TCGA.C5.A1BK	m6Acluster 1	m6A.gene.cluster.A	High
TCGA.C5.A1BL	m6Acluster 1	m6A.gene.cluster.A	High
TCGA.C5.A1BM	m6Acluster 1	m6A.gene.cluster.A	High
TCGA.C5.A1BN	m6Acluster 1	m6A.gene.cluster.A	High
TCGA.C5.A1BQ	m6Acluster 1	m6A.gene.cluster.A	High
TCGA.C5.A1M5	m6Acluster 1	m6A.gene.cluster.A	High
TCGA.C5.A1M6	m6Acluster 1	m6A.gene.cluster.A	High
TCGA.C5.A1M7	m6Acluster 1	m6A.gene.cluster.A	High
TCGA.C5.A1M8	m6Acluster 1	m6A.gene.cluster.A	High
TCGA.C5.A1M9	m6Acluster 1	m6A.gene.cluster.A	High
TCGA.C5.A1ME	m6Acluster 1	m6A.gene.cluster.A	High
TCGA.C5.A1MF	m6Acluster 1	m6A.gene.cluster.A	High
TCGA.C5.A1MH	m6Acluster 1	m6A.gene.cluster.A	High
TCGA.C5.A1MI	m6Acluster 1	m6A.gene.cluster.A	High
TCGA.C5.A1MJ	m6Acluster 1	m6A.gene.cluster.A	High
TCGA.C5.A1MK	m6Acluster 1	m6A.gene.cluster.A	High
TCGA.C5.A1ML	m6Acluster 1	m6A.gene.cluster.A	High
TCGA.C5.A1MN	m6Acluster 1	m6A.gene.cluster.A	High
TCGA.C5.A1MP	m6Acluster 1	m6A.gene.cluster.A	High
TCGA.C5.A1MQ	m6Acluster 1	m6A.gene.cluster.A	High
TCGA.C5.A2LS	m6Acluster 1	m6A.gene.cluster.A	High
TCGA.C5.A2LT	m6Acluster 1	m6A.gene.cluster.A	High
TCGA.C5.A2LV	m6Acluster 1	m6A.gene.cluster.A	High
TCGA.C5.A2LX	m6Acluster 1	m6A.gene.cluster.A	High
TCGA.C5.A2LY	m6Acluster 1	m6A.gene.cluster.A	High
TCGA.C5.A2LZ	m6Acluster 1	m6A.gene.cluster.A	High
TCGA.C5.A2M1	m6Acluster 1	m6A.gene.cluster.A	High
TCGA.C5.A2M2	m6Acluster 1	m6A.gene.cluster.A	High
TCGA.C5.A3HD	m6Acluster 1	m6A.gene.cluster.A	High
TCGA.C5.A3HE	m6Acluster 1	m6A.gene.cluster.A	High
TCGA.C5.A3HF	m6Acluster 1	m6A.gene.cluster.A	High
TCGA.C5.A3HL	m6Acluster 1	m6A.gene.cluster.A	High
TCGA.C5.A7CG	m6Acluster 1	m6A.gene.cluster.A	High
TCGA.C5.A7CH	m6Acluster 1	m6A.gene.cluster.A	High
TCGA.C5.A7CJ	m6Acluster 1	m6A.gene.cluster.A	High
TCGA.C5.A7CK	m6Acluster 1	m6A.gene.cluster.A	High
TCGA.C5.A7CL	m6Acluster 1	m6A.gene.cluster.A	High
TCGA.C5.A7CM	m6Acluster 1	m6A.gene.cluster.A	High
TCGA.C5.A7CO	m6Acluster 1	m6A.gene.cluster.A	High
TCGA.C5.A7UC	m6Acluster 1	m6A.gene.cluster.A	High
TCGA.C5.A7UE	m6Acluster 1	m6A.gene.cluster.A	High
TCGA.C5.A7UH	m6Acluster 1	m6A.gene.cluster.A	High
TCGA.C5.A7UI	m6Acluster 1	m6A.gene.cluster.A	High
TCGA.C5.A7X3	m6Acluster 1	m6A.gene.cluster.A	High
TCGA.C5.A7X5	m6Acluster 1	m6A.gene.cluster.A	High
TCGA.C5.A7X8	m6Acluster 1	m6A.gene.cluster.A	High
TCGA.C5.A7XC	m6Acluster 1	m6A.gene.cluster.A	High
TCGA.C5.A8XH	m6Acluster 1	m6A.gene.cluster.A	High
TCGA.C5.A8XI	m6Acluster 1	m6A.gene.cluster.A	High
TCGA.C5.A8XJ	m6Acluster 1	m6A.gene.cluster.A	High
TCGA.C5.A8XK	m6Acluster 1	m6A.gene.cluster.A	High
TCGA.C5.A8YQ	m6Acluster 1	m6A.gene.cluster.A	High
TCGA.C5.A8YR	m6Acluster 1	m6A.gene.cluster.A	High
TCGA.C5.A8YT	m6Acluster 1	m6A.gene.cluster.A	High
TCGA.C5.A8ZZ	m6Acluster 1	m6A.gene.cluster.A	High
TCGA.C5.A901	m6Acluster 1	m6A.gene.cluster.A	High
TCGA.C5.A902	m6Acluster 1	m6A.gene.cluster.A	High
TCGA.C5.A905	m6Acluster 1	m6A.gene.cluster.A	High
TCGA.C5.A907	m6Acluster 1	m6A.gene.cluster.A	High
TCGA.DG.A2KH	m6Acluster 1	m6A.gene.cluster.A	High
TCGA.DG.A2KJ	m6Acluster 1	m6A.gene.cluster.A	High
TCGA.DG.A2KK	m6Acluster 1	m6A.gene.cluster.A	High
TCGA.DG.A2KL	m6Acluster 1	m6A.gene.cluster.A	High
TCGA.DG.A2KM	m6Acluster 1	m6A.gene.cluster.A	High
TCGA.DR.A0ZL	m6Acluster 1	m6A.gene.cluster.A	High
TCGA.DR.A0ZM	m6Acluster 1	m6A.gene.cluster.A	High
TCGA.DS.A0VK	m6Acluster 1	m6A.gene.cluster.A	High
TCGA.DS.A0VL	m6Acluster 1	m6A.gene.cluster.A	High
TCGA.DS.A0VM	m6Acluster 1	m6A.gene.cluster.A	High
TCGA.DS.A0VN	m6Acluster 1	m6A.gene.cluster.A	High
TCGA.DS.A1O9	m6Acluster 1	m6A.gene.cluster.A	High
TCGA.DS.A1OA	m6Acluster 1	m6A.gene.cluster.A	High
TCGA.DS.A1OB	m6Acluster 1	m6A.gene.cluster.A	High
TCGA.DS.A1OC	m6Acluster 1	m6A.gene.cluster.A	High
TCGA.DS.A1OD	m6Acluster 1	m6A.gene.cluster.A	High
TCGA.DS.A3LQ	m6Acluster 1	m6A.gene.cluster.A	High
TCGA.DS.A5RQ	m6Acluster 1	m6A.gene.cluster.A	High
TCGA.DS.A7WF	m6Acluster 1	m6A.gene.cluster.A	High
TCGA.DS.A7WH	m6Acluster 1	m6A.gene.cluster.A	High
TCGA.DS.A7WI	m6Acluster 1	m6A.gene.cluster.A	High
TCGA.EA.A1QS	m6Acluster 1	m6A.gene.cluster.A	High
TCGA.EA.A1QT	m6Acluster 1	m6A.gene.cluster.A	High
TCGA.EA.A3HQ	m6Acluster 1	m6A.gene.cluster.A	High
TCGA.EA.A3HR	m6Acluster 1	m6A.gene.cluster.A	High
TCGA.EA.A3HS	m6Acluster 1	m6A.gene.cluster.A	High
TCGA.EA.A3HT	m6Acluster 1	m6A.gene.cluster.A	High
TCGA.EA.A3HU	m6Acluster 1	m6A.gene.cluster.A	High
TCGA.EA.A3QD	m6Acluster 1	m6A.gene.cluster.A	High
TCGA.EA.A3QE	m6Acluster 1	m6A.gene.cluster.A	High
TCGA.EA.A3Y4	m6Acluster 1	m6A.gene.cluster.A	High
TCGA.EA.A410	m6Acluster 1	m6A.gene.cluster.A	High
TCGA.EA.A411	m6Acluster 1	m6A.gene.cluster.A	High
TCGA.EA.A439	m6Acluster 1	m6A.gene.cluster.A	High
TCGA.EA.A43B	m6Acluster 1	m6A.gene.cluster.A	High
TCGA.EA.A44S	m6Acluster 1	m6A.gene.cluster.A	High
TCGA.EA.A4BA	m6Acluster 1	m6A.gene.cluster.A	High
TCGA.EA.A50E	m6Acluster 1	m6A.gene.cluster.A	High
TCGA.EA.A556	m6Acluster 1	m6A.gene.cluster.A	High
TCGA.EA.A5FO	m6Acluster 1	m6A.gene.cluster.A	High
TCGA.EA.A5O9	m6Acluster 1	m6A.gene.cluster.A	High
TCGA.EA.A5ZD	m6Acluster 1	m6A.gene.cluster.A	High
TCGA.EA.A5ZE	m6Acluster 1	m6A.gene.cluster.A	High
TCGA.EA.A5ZF	m6Acluster 1	m6A.gene.cluster.A	High
TCGA.EA.A6QX	m6Acluster 1	m6A.gene.cluster.A	High
TCGA.EA.A78R	m6Acluster 1	m6A.gene.cluster.A	High
TCGA.EA.A97N	m6Acluster 1	m6A.gene.cluster.A	High
TCGA.EK.A2GZ	m6Acluster 1	m6A.gene.cluster.A	High
TCGA.EK.A2H0	m6Acluster 1	m6A.gene.cluster.A	High
TCGA.EK.A2H1	m6Acluster 1	m6A.gene.cluster.A	High
TCGA.EK.A2IP	m6Acluster 1	m6A.gene.cluster.A	High
TCGA.EK.A2IR	m6Acluster 1	m6A.gene.cluster.A	High
TCGA.EK.A2PG	m6Acluster 1	m6A.gene.cluster.A	High
TCGA.EK.A2PI	m6Acluster 1	m6A.gene.cluster.A	High
TCGA.EK.A2PK	m6Acluster 1	m6A.gene.cluster.A	High
TCGA.EK.A2PL	m6Acluster 1	m6A.gene.cluster.A	High
TCGA.EK.A2PM	m6Acluster 1	m6A.gene.cluster.A	High
TCGA.EK.A2R7	m6Acluster 1	m6A.gene.cluster.A	High
TCGA.EK.A2R8	m6Acluster 1	m6A.gene.cluster.A	High
TCGA.EK.A2R9	m6Acluster 1	m6A.gene.cluster.A	High
TCGA.EK.A2RA	m6Acluster 1	m6A.gene.cluster.A	High
TCGA.EK.A2RB	m6Acluster 1	m6A.gene.cluster.A	High
TCGA.EK.A2RC	m6Acluster 1	m6A.gene.cluster.A	High
TCGA.EK.A2RE	m6Acluster 1	m6A.gene.cluster.A	High
TCGA.EK.A2RJ	m6Acluster 1	m6A.gene.cluster.A	High
TCGA.EK.A2RK	m6Acluster 1	m6A.gene.cluster.A	High
TCGA.EK.A2RL	m6Acluster 1	m6A.gene.cluster.A	High
TCGA.EK.A2RM	m6Acluster 1	m6A.gene.cluster.A	High
TCGA.EK.A2RN	m6Acluster 1	m6A.gene.cluster.A	High
TCGA.EK.A2RO	m6Acluster 1	m6A.gene.cluster.A	High
TCGA.EK.A3GJ	m6Acluster 1	m6A.gene.cluster.A	High
TCGA.EK.A3GK	m6Acluster 1	m6A.gene.cluster.A	High
TCGA.EK.A3GN	m6Acluster 1	m6A.gene.cluster.A	High
TCGA.EX.A1H5	m6Acluster 1	m6A.gene.cluster.A	High
TCGA.EX.A1H6	m6Acluster 1	m6A.gene.cluster.A	High
TCGA.EX.A3L1	m6Acluster 1	m6A.gene.cluster.A	High
TCGA.EX.A449	m6Acluster 1	m6A.gene.cluster.A	High
TCGA.EX.A69L	m6Acluster 1	m6A.gene.cluster.A	High
TCGA.EX.A69M	m6Acluster 1	m6A.gene.cluster.A	High
TCGA.EX.A8YF	m6Acluster 1	m6A.gene.cluster.A	High
TCGA.FU.A23K	m6Acluster 1	m6A.gene.cluster.A	High
TCGA.FU.A23L	m6Acluster 1	m6A.gene.cluster.A	High
TCGA.FU.A2QG	m6Acluster 1	m6A.gene.cluster.A	High
TCGA.FU.A3EO	m6Acluster 1	m6A.gene.cluster.A	High
TCGA.FU.A3HY	m6Acluster 1	m6A.gene.cluster.A	High
TCGA.FU.A3HZ	m6Acluster 1	m6A.gene.cluster.A	High
TCGA.FU.A3NI	m6Acluster 1	m6A.gene.cluster.A	High
TCGA.FU.A3TQ	m6Acluster 1	m6A.gene.cluster.A	High
TCGA.FU.A3TX	m6Acluster 1	m6A.gene.cluster.A	High
TCGA.FU.A3WB	m6Acluster 1	m6A.gene.cluster.A	High
TCGA.FU.A3YQ	m6Acluster 1	m6A.gene.cluster.A	High
TCGA.FU.A40J	m6Acluster 1	m6A.gene.cluster.A	High
TCGA.FU.A57G	m6Acluster 1	m6A.gene.cluster.A	High
TCGA.FU.A5XV	m6Acluster 1	m6A.gene.cluster.A	High
TCGA.FU.A770	m6Acluster 1	m6A.gene.cluster.A	High
TCGA.GH.A9DA	m6Acluster 1	m6A.gene.cluster.A	High
TCGA.HG.A2PA	m6Acluster 1	m6A.gene.cluster.A	High
TCGA.HM.A3JJ	m6Acluster 1	m6A.gene.cluster.A	High
TCGA.HM.A3JK	m6Acluster 1	m6A.gene.cluster.A	High
TCGA.HM.A4S6	m6Acluster 1	m6A.gene.cluster.A	High
TCGA.HM.A6W2	m6Acluster 1	m6A.gene.cluster.A	High
TCGA.IR.A3L7	m6Acluster 1	m6A.gene.cluster.A	High
TCGA.IR.A3LA	m6Acluster 1	m6A.gene.cluster.A	High
TCGA.IR.A3LB	m6Acluster 1	m6A.gene.cluster.A	High
TCGA.IR.A3LC	m6Acluster 1	m6A.gene.cluster.A	High
TCGA.IR.A3LF	m6Acluster 1	m6A.gene.cluster.A	High
TCGA.IR.A3LH	m6Acluster 1	m6A.gene.cluster.A	High
TCGA.IR.A3LI	m6Acluster 1	m6A.gene.cluster.A	High
TCGA.IR.A3LK	m6Acluster 1	m6A.gene.cluster.A	High
TCGA.IR.A3LL	m6Acluster 1	m6A.gene.cluster.A	High
TCGA.JW.A5VG	m6Acluster 1	m6A.gene.cluster.A	High
TCGA.JW.A5VH	m6Acluster 1	m6A.gene.cluster.A	High
TCGA.JW.A5VI	m6Acluster 1	m6A.gene.cluster.A	High
TCGA.JW.A5VJ	m6Acluster 1	m6A.gene.cluster.A	High
TCGA.JW.A5VK	m6Acluster 1	m6A.gene.cluster.A	High
TCGA.JW.A5VL	m6Acluster 1	m6A.gene.cluster.A	High
TCGA.JW.A69B	m6Acluster 1	m6A.gene.cluster.A	High
TCGA.JW.A852	m6Acluster 1	m6A.gene.cluster.A	High
TCGA.JW.AAVH	m6Acluster 1	m6A.gene.cluster.A	High
TCGA.JX.A3PZ	m6Acluster 1	m6A.gene.cluster.A	High
TCGA.JX.A3Q0	m6Acluster 1	m6A.gene.cluster.A	High
TCGA.JX.A3Q8	m6Acluster 1	m6A.gene.cluster.A	High
TCGA.JX.A5QV	m6Acluster 1	m6A.gene.cluster.A	High
TCGA.LP.A4AU	m6Acluster 1	m6A.gene.cluster.A	High
TCGA.LP.A4AW	m6Acluster 1	m6A.gene.cluster.A	High
TCGA.LP.A4AX	m6Acluster 1	m6A.gene.cluster.A	High
TCGA.LP.A5U2	m6Acluster 1	m6A.gene.cluster.A	High
TCGA.LP.A5U3	m6Acluster 1	m6A.gene.cluster.A	High
TCGA.LP.A7HU	m6Acluster 1	m6A.gene.cluster.A	High
TCGA.MA.AA3W	m6Acluster 1	m6A.gene.cluster.A	High
TCGA.MA.AA3X	m6Acluster 1	m6A.gene.cluster.A	High
TCGA.MA.AA3Y	m6Acluster 1	m6A.gene.cluster.A	High
TCGA.MA.AA3Z	m6Acluster 1	m6A.gene.cluster.A	High
TCGA.MA.AA41	m6Acluster 1	m6A.gene.cluster.A	High
TCGA.MA.AA42	m6Acluster 1	m6A.gene.cluster.A	High
TCGA.MA.AA43	m6Acluster 1	m6A.gene.cluster.A	High
TCGA.MU.A51Y	m6Acluster 1	m6A.gene.cluster.A	High
TCGA.MU.A5YI	m6Acluster 1	m6A.gene.cluster.A	High
TCGA.MU.A8JM	m6Acluster 1	m6A.gene.cluster.A	High
TCGA.MY.A5BD	m6Acluster 1	m6A.gene.cluster.A	High
TCGA.MY.A5BE	m6Acluster 1	m6A.gene.cluster.A	High
TCGA.MY.A5BF	m6Acluster 1	m6A.gene.cluster.A	High
TCGA.MY.A913	m6Acluster 1	m6A.gene.cluster.A	High
TCGA.PN.A8MA	m6Acluster 1	m6A.gene.cluster.A	High
TCGA.Q1.A5R1	m6Acluster 1	m6A.gene.cluster.A	High
TCGA.Q1.A5R2	m6Acluster 1	m6A.gene.cluster.A	High
TCGA.Q1.A5R3	m6Acluster 1	m6A.gene.cluster.A	High
TCGA.Q1.A6DT	m6Acluster 1	m6A.gene.cluster.A	High
TCGA.Q1.A6DV	m6Acluster 1	m6A.gene.cluster.A	High
TCGA.Q1.A6DW	m6Acluster 1	m6A.gene.cluster.A	High
TCGA.Q1.A73O	m6Acluster 1	m6A.gene.cluster.A	High
TCGA.Q1.A73P	m6Acluster 1	m6A.gene.cluster.A	High
TCGA.Q1.A73Q	m6Acluster 1	m6A.gene.cluster.A	High
TCGA.Q1.A73R	m6Acluster 1	m6A.gene.cluster.A	High
TCGA.Q1.A73S	m6Acluster 1	m6A.gene.cluster.A	High
TCGA.R2.A69V	m6Acluster 1	m6A.gene.cluster.A	High
TCGA.RA.A741	m6Acluster 1	m6A.gene.cluster.A	High
TCGA.UC.A7PD	m6Acluster 1	m6A.gene.cluster.A	High
TCGA.UC.A7PF	m6Acluster 1	m6A.gene.cluster.A	High
TCGA.UC.A7PG	m6Acluster 1	m6A.gene.cluster.A	High
TCGA.UC.A7PI	m6Acluster 1	m6A.gene.cluster.A	High
TCGA.VS.A8EB	m6Acluster 1	m6A.gene.cluster.A	High
TCGA.VS.A8EC	m6Acluster 1	m6A.gene.cluster.A	High
TCGA.VS.A8EG	m6Acluster 1	m6A.gene.cluster.A	High
TCGA.VS.A8EH	m6Acluster 1	m6A.gene.cluster.A	High
TCGA.VS.A8EI	m6Acluster 1	m6A.gene.cluster.A	High
TCGA.VS.A8EJ	m6Acluster 1	m6A.gene.cluster.A	High
TCGA.VS.A8EK	m6Acluster 1	m6A.gene.cluster.A	High
TCGA.VS.A8EL	m6Acluster 1	m6A.gene.cluster.A	High
TCGA.VS.A8Q8	m6Acluster 1	m6A.gene.cluster.A	High
TCGA.VS.A8Q9	m6Acluster 1	m6A.gene.cluster.A	High
TCGA.VS.A8QA	m6Acluster 2	m6A.gene.cluster.A	High
TCGA.VS.A8QC	m6Acluster 1	m6A.gene.cluster.A	High
TCGA.VS.A8QF	m6Acluster 1	m6A.gene.cluster.A	High
TCGA.VS.A8QH	m6Acluster 1	m6A.gene.cluster.A	High
TCGA.VS.A8QM	m6Acluster 1	m6A.gene.cluster.A	High
TCGA.VS.A94W	m6Acluster 1	m6A.gene.cluster.A	High
TCGA.VS.A94X	m6Acluster 1	m6A.gene.cluster.A	High
TCGA.VS.A94Y	m6Acluster 1	m6A.gene.cluster.A	High
TCGA.VS.A94Z	m6Acluster 1	m6A.gene.cluster.A	High
TCGA.VS.A950	m6Acluster 1	m6A.gene.cluster.A	High
TCGA.VS.A952	m6Acluster 1	m6A.gene.cluster.A	High
TCGA.VS.A953	m6Acluster 1	m6A.gene.cluster.A	High
TCGA.VS.A954	m6Acluster 1	m6A.gene.cluster.A	High
TCGA.VS.A957	m6Acluster 1	m6A.gene.cluster.A	High
TCGA.VS.A958	m6Acluster 1	m6A.gene.cluster.A	High
TCGA.VS.A959	m6Acluster 1	m6A.gene.cluster.A	High
TCGA.VS.A9U5	m6Acluster 1	m6A.gene.cluster.A	High
TCGA.VS.A9U6	m6Acluster 1	m6A.gene.cluster.A	High
TCGA.VS.A9U7	m6Acluster 1	m6A.gene.cluster.A	High
TCGA.VS.A9UB	m6Acluster 1	m6A.gene.cluster.A	High
TCGA.VS.A9UC	m6Acluster 1	m6A.gene.cluster.A	High
TCGA.VS.A9UD	m6Acluster 1	m6A.gene.cluster.A	High
TCGA.VS.A9UH	m6Acluster 1	m6A.gene.cluster.A	High
TCGA.VS.A9UI	m6Acluster 1	m6A.gene.cluster.A	High
TCGA.VS.A9UJ	m6Acluster 1	m6A.gene.cluster.A	High
TCGA.VS.A9UL	m6Acluster 2	m6A.gene.cluster.A	High
TCGA.VS.A9UM	m6Acluster 2	m6A.gene.cluster.A	High
TCGA.VS.A9UO	m6Acluster 1	m6A.gene.cluster.A	High
TCGA.VS.A9UP	m6Acluster 1	m6A.gene.cluster.A	High
TCGA.VS.A9UQ	m6Acluster 1	m6A.gene.cluster.A	High
TCGA.VS.A9UR	m6Acluster 1	m6A.gene.cluster.A	High
TCGA.VS.A9UT	m6Acluster 1	m6A.gene.cluster.A	High
TCGA.VS.A9UU	m6Acluster 1	m6A.gene.cluster.A	High
TCGA.VS.A9UV	m6Acluster 1	m6A.gene.cluster.A	High
TCGA.VS.A9UY	m6Acluster 1	m6A.gene.cluster.A	High
TCGA.VS.A9UZ	m6Acluster 2	m6A.gene.cluster.A	High
TCGA.VS.A9V0	m6Acluster 1	m6A.gene.cluster.A	High
TCGA.VS.A9V1	m6Acluster 1	m6A.gene.cluster.A	High
TCGA.VS.A9V2	m6Acluster 1	m6A.gene.cluster.A	High
TCGA.VS.A9V3	m6Acluster 1	m6A.gene.cluster.A	High
TCGA.VS.A9V4	m6Acluster 1	m6A.gene.cluster.A	High
TCGA.VS.A9V5	m6Acluster 1	m6A.gene.cluster.A	High
TCGA.VS.AA62	m6Acluster 1	m6A.gene.cluster.A	High
TCGA.WL.A834	m6Acluster 1	m6A.gene.cluster.A	High
TCGA.XS.A8TJ	m6Acluster 1	m6A.gene.cluster.A	High
TCGA.ZJ.A8QQ	m6Acluster 1	m6A.gene.cluster.A	High
TCGA.ZJ.A8QR	m6Acluster 1	m6A.gene.cluster.A	High
TCGA.ZJ.AAX4	m6Acluster 1	m6A.gene.cluster.A	High
TCGA.ZJ.AAXA	m6Acluster 1	m6A.gene.cluster.A	High
TCGA.ZJ.AAXU	m6Acluster 1	m6A.gene.cluster.A	High
TCGA.ZX.AA5X	m6Acluster 1	m6A.gene.cluster.A	High
TCGA.3X.AAV9	m6Acluster 1	m6A.gene.cluster.A	High
TCGA.3X.AAVA	m6Acluster 1	m6A.gene.cluster.B	Low
TCGA.3X.AAVB	m6Acluster 1	m6A.gene.cluster.A	High
TCGA.3X.AAVC	m6Acluster 1	m6A.gene.cluster.A	High
TCGA.3X.AAVE	m6Acluster 1	m6A.gene.cluster.B	Low
TCGA.4G.AAZO	m6Acluster 1	m6A.gene.cluster.A	High
TCGA.4G.AAZT	m6Acluster 1	m6A.gene.cluster.A	High
TCGA.W5.AA2G	m6Acluster 1	m6A.gene.cluster.A	High
TCGA.W5.AA2H	m6Acluster 1	m6A.gene.cluster.A	High
TCGA.W5.AA2I	m6Acluster 1	m6A.gene.cluster.A	High
TCGA.W5.AA2O	m6Acluster 1	m6A.gene.cluster.A	High
TCGA.W5.AA2Q	m6Acluster 1	m6A.gene.cluster.A	High
TCGA.W5.AA2R	m6Acluster 1	m6A.gene.cluster.A	High
TCGA.W5.AA2T	m6Acluster 2	m6A.gene.cluster.B	High
TCGA.W5.AA2U	m6Acluster 1	m6A.gene.cluster.A	High
TCGA.W5.AA2W	m6Acluster 1	m6A.gene.cluster.A	High
TCGA.W5.AA2X	m6Acluster 1	m6A.gene.cluster.A	High
TCGA.W5.AA2Z	m6Acluster 1	m6A.gene.cluster.B	High
TCGA.W5.AA30	m6Acluster 1	m6A.gene.cluster.B	Low
TCGA.W5.AA31	m6Acluster 1	m6A.gene.cluster.A	High
TCGA.W5.AA33	m6Acluster 1	m6A.gene.cluster.A	High
TCGA.W5.AA34	m6Acluster 1	m6A.gene.cluster.A	High
TCGA.W5.AA36	m6Acluster 1	m6A.gene.cluster.A	High
TCGA.W5.AA38	m6Acluster 1	m6A.gene.cluster.A	High
TCGA.W5.AA39	m6Acluster 1	m6A.gene.cluster.A	High
TCGA.W6.AA0S	m6Acluster 1	m6A.gene.cluster.B	High
TCGA.WD.A7RX	m6Acluster 1	m6A.gene.cluster.A	High
TCGA.YR.A95A	m6Acluster 1	m6A.gene.cluster.B	Low
TCGA.ZD.A8I3	m6Acluster 1	m6A.gene.cluster.A	High
TCGA.ZH.A8Y1	m6Acluster 1	m6A.gene.cluster.A	High
TCGA.ZH.A8Y2	m6Acluster 1	m6A.gene.cluster.A	High
TCGA.ZH.A8Y4	m6Acluster 1	m6A.gene.cluster.A	High
TCGA.ZH.A8Y5	m6Acluster 1	m6A.gene.cluster.A	High
TCGA.ZH.A8Y6	m6Acluster 1	m6A.gene.cluster.A	High
TCGA.ZH.A8Y8	m6Acluster 1	m6A.gene.cluster.A	High
TCGA.ZU.A8S4	m6Acluster 1	m6A.gene.cluster.A	High
TCGA.3L.AA1B	m6Acluster 1	m6A.gene.cluster.A	High
TCGA.4N.A93T	m6Acluster 1	m6A.gene.cluster.A	High
TCGA.4T.AA8H	m6Acluster 1	m6A.gene.cluster.A	High
TCGA.5M.AAT4	m6Acluster 1	m6A.gene.cluster.A	High
TCGA.5M.AAT6	m6Acluster 1	m6A.gene.cluster.A	High
TCGA.5M.AATE	m6Acluster 1	m6A.gene.cluster.A	High
TCGA.A6.2675	m6Acluster 1	m6A.gene.cluster.A	High
TCGA.A6.2682	m6Acluster 1	m6A.gene.cluster.A	High
TCGA.A6.2684	m6Acluster 1	m6A.gene.cluster.A	High
TCGA.A6.2685	m6Acluster 1	m6A.gene.cluster.A	High
TCGA.A6.2686	m6Acluster 1	m6A.gene.cluster.A	High
TCGA.A6.4105	m6Acluster 1	m6A.gene.cluster.A	High
TCGA.A6.5656	m6Acluster 1	m6A.gene.cluster.A	High
TCGA.A6.5657	m6Acluster 1	m6A.gene.cluster.A	High
TCGA.A6.5659	m6Acluster 1	m6A.gene.cluster.A	High
TCGA.A6.5660	m6Acluster 1	m6A.gene.cluster.A	High
TCGA.A6.5661	m6Acluster 1	m6A.gene.cluster.A	High
TCGA.A6.5662	m6Acluster 1	m6A.gene.cluster.A	High
TCGA.A6.5664	m6Acluster 1	m6A.gene.cluster.A	High
TCGA.A6.5665	m6Acluster 1	m6A.gene.cluster.A	High
TCGA.A6.5666	m6Acluster 1	m6A.gene.cluster.A	High
TCGA.A6.5667	m6Acluster 1	m6A.gene.cluster.A	High
TCGA.A6.6137	m6Acluster 1	m6A.gene.cluster.A	High
TCGA.A6.6138	m6Acluster 1	m6A.gene.cluster.A	High
TCGA.A6.6140	m6Acluster 1	m6A.gene.cluster.A	High
TCGA.A6.6141	m6Acluster 1	m6A.gene.cluster.A	High
TCGA.A6.6142	m6Acluster 1	m6A.gene.cluster.A	High
TCGA.A6.6648	m6Acluster 1	m6A.gene.cluster.A	High
TCGA.A6.6649	m6Acluster 1	m6A.gene.cluster.A	High
TCGA.A6.6650	m6Acluster 1	m6A.gene.cluster.A	High
TCGA.A6.6651	m6Acluster 1	m6A.gene.cluster.A	High
TCGA.A6.6652	m6Acluster 1	m6A.gene.cluster.A	High
TCGA.A6.6653	m6Acluster 1	m6A.gene.cluster.A	High
TCGA.A6.6654	m6Acluster 1	m6A.gene.cluster.A	High
TCGA.A6.6780	m6Acluster 1	m6A.gene.cluster.A	High
TCGA.A6.6781	m6Acluster 1	m6A.gene.cluster.A	High
TCGA.A6.6782	m6Acluster 1	m6A.gene.cluster.A	High
TCGA.A6.A565	m6Acluster 1	m6A.gene.cluster.A	High
TCGA.A6.A566	m6Acluster 1	m6A.gene.cluster.A	High
TCGA.A6.A567	m6Acluster 1	m6A.gene.cluster.A	High
TCGA.A6.A56B	m6Acluster 1	m6A.gene.cluster.A	High
TCGA.A6.A5ZU	m6Acluster 1	m6A.gene.cluster.A	High
TCGA.AA.3489	m6Acluster 1	m6A.gene.cluster.A	High
TCGA.AA.3492	m6Acluster 1	m6A.gene.cluster.A	High
TCGA.AA.3495	m6Acluster 1	m6A.gene.cluster.A	High
TCGA.AA.3496	m6Acluster 1	m6A.gene.cluster.A	High
TCGA.AA.3502	m6Acluster 1	m6A.gene.cluster.A	High
TCGA.AA.3506	m6Acluster 1	m6A.gene.cluster.A	High
TCGA.AA.3509	m6Acluster 1	m6A.gene.cluster.A	High
TCGA.AA.3511	m6Acluster 1	m6A.gene.cluster.A	High
TCGA.AA.3526	m6Acluster 1	m6A.gene.cluster.A	High
TCGA.AA.3655	m6Acluster 1	m6A.gene.cluster.A	High
TCGA.AA.3660	m6Acluster 1	m6A.gene.cluster.A	High
TCGA.AA.3662	m6Acluster 1	m6A.gene.cluster.A	High
TCGA.AA.3663	m6Acluster 1	m6A.gene.cluster.A	High
TCGA.AA.3675	m6Acluster 1	m6A.gene.cluster.A	High
TCGA.AA.3685	m6Acluster 1	m6A.gene.cluster.A	High
TCGA.AA.3697	m6Acluster 1	m6A.gene.cluster.A	High
TCGA.AA.3713	m6Acluster 1	m6A.gene.cluster.A	High
TCGA.AA.A01P	m6Acluster 1	m6A.gene.cluster.A	High
TCGA.AA.A01X	m6Acluster 1	m6A.gene.cluster.A	High
TCGA.AA.A01Z	m6Acluster 1	m6A.gene.cluster.A	High
TCGA.AA.A02K	m6Acluster 1	m6A.gene.cluster.A	High
TCGA.AA.A02Y	m6Acluster 1	m6A.gene.cluster.A	High
TCGA.AD.5900	m6Acluster 1	m6A.gene.cluster.A	High
TCGA.AD.6548	m6Acluster 1	m6A.gene.cluster.A	High
TCGA.AD.6888	m6Acluster 1	m6A.gene.cluster.A	High
TCGA.AD.6889	m6Acluster 1	m6A.gene.cluster.A	High
TCGA.AD.6890	m6Acluster 1	m6A.gene.cluster.A	High
TCGA.AD.6895	m6Acluster 1	m6A.gene.cluster.A	High
TCGA.AD.6899	m6Acluster 1	m6A.gene.cluster.A	High
TCGA.AD.6901	m6Acluster 1	m6A.gene.cluster.A	High
TCGA.AD.6963	m6Acluster 1	m6A.gene.cluster.A	High
TCGA.AD.6964	m6Acluster 1	m6A.gene.cluster.A	High
TCGA.AD.6965	m6Acluster 1	m6A.gene.cluster.A	High
TCGA.AD.A5EK	m6Acluster 1	m6A.gene.cluster.A	High
TCGA.AM.5820	m6Acluster 1	m6A.gene.cluster.A	High
TCGA.AM.5821	m6Acluster 1	m6A.gene.cluster.A	High
TCGA.AU.3779	m6Acluster 1	m6A.gene.cluster.A	High
TCGA.AU.6004	m6Acluster 1	m6A.gene.cluster.A	High
TCGA.AY.5543	m6Acluster 1	m6A.gene.cluster.A	High
TCGA.AY.6196	m6Acluster 1	m6A.gene.cluster.A	High
TCGA.AY.6197	m6Acluster 1	m6A.gene.cluster.A	High
TCGA.AY.6386	m6Acluster 1	m6A.gene.cluster.A	High
TCGA.AY.A54L	m6Acluster 1	m6A.gene.cluster.A	High
TCGA.AY.A69D	m6Acluster 1	m6A.gene.cluster.A	High
TCGA.AY.A71X	m6Acluster 1	m6A.gene.cluster.A	High
TCGA.AY.A8YK	m6Acluster 1	m6A.gene.cluster.A	High
TCGA.AZ.4313	m6Acluster 1	m6A.gene.cluster.A	High
TCGA.AZ.4315	m6Acluster 1	m6A.gene.cluster.A	High
TCGA.AZ.4323	m6Acluster 1	m6A.gene.cluster.A	High
TCGA.AZ.4614	m6Acluster 1	m6A.gene.cluster.A	High
TCGA.AZ.4615	m6Acluster 1	m6A.gene.cluster.A	High
TCGA.AZ.4616	m6Acluster 1	m6A.gene.cluster.A	High
TCGA.AZ.4682	m6Acluster 1	m6A.gene.cluster.A	High
TCGA.AZ.4684	m6Acluster 1	m6A.gene.cluster.A	High
TCGA.AZ.5403	m6Acluster 1	m6A.gene.cluster.A	High
TCGA.AZ.5407	m6Acluster 1	m6A.gene.cluster.A	High
TCGA.AZ.6598	m6Acluster 1	m6A.gene.cluster.A	High
TCGA.AZ.6599	m6Acluster 1	m6A.gene.cluster.A	High
TCGA.AZ.6600	m6Acluster 1	m6A.gene.cluster.A	High
TCGA.AZ.6601	m6Acluster 1	m6A.gene.cluster.A	High
TCGA.AZ.6603	m6Acluster 1	m6A.gene.cluster.A	High
TCGA.AZ.6605	m6Acluster 1	m6A.gene.cluster.A	High
TCGA.AZ.6606	m6Acluster 1	m6A.gene.cluster.A	High
TCGA.AZ.6607	m6Acluster 1	m6A.gene.cluster.A	High
TCGA.AZ.6608	m6Acluster 1	m6A.gene.cluster.A	High
TCGA.CA.5254	m6Acluster 1	m6A.gene.cluster.A	High
TCGA.CA.5255	m6Acluster 1	m6A.gene.cluster.A	High
TCGA.CA.5256	m6Acluster 1	m6A.gene.cluster.A	High
TCGA.CA.5796	m6Acluster 1	m6A.gene.cluster.A	High
TCGA.CA.5797	m6Acluster 1	m6A.gene.cluster.A	High
TCGA.CA.6715	m6Acluster 1	m6A.gene.cluster.A	High
TCGA.CA.6716	m6Acluster 1	m6A.gene.cluster.A	High
TCGA.CA.6717	m6Acluster 1	m6A.gene.cluster.A	High
TCGA.CA.6718	m6Acluster 1	m6A.gene.cluster.A	High
TCGA.CA.6719	m6Acluster 1	m6A.gene.cluster.A	High
TCGA.CK.4947	m6Acluster 1	m6A.gene.cluster.A	High
TCGA.CK.4948	m6Acluster 1	m6A.gene.cluster.A	High
TCGA.CK.4950	m6Acluster 1	m6A.gene.cluster.A	High
TCGA.CK.4951	m6Acluster 1	m6A.gene.cluster.A	High
TCGA.CK.4952	m6Acluster 1	m6A.gene.cluster.A	High
TCGA.CK.5912	m6Acluster 1	m6A.gene.cluster.A	High
TCGA.CK.5913	m6Acluster 1	m6A.gene.cluster.A	High
TCGA.CK.5914	m6Acluster 1	m6A.gene.cluster.A	High
TCGA.CK.5916	m6Acluster 1	m6A.gene.cluster.A	High
TCGA.CK.6747	m6Acluster 1	m6A.gene.cluster.A	High
TCGA.CK.6748	m6Acluster 1	m6A.gene.cluster.A	High
TCGA.CK.6751	m6Acluster 1	m6A.gene.cluster.A	High
TCGA.CM.4743	m6Acluster 1	m6A.gene.cluster.A	High
TCGA.CM.4744	m6Acluster 1	m6A.gene.cluster.A	High
TCGA.CM.4747	m6Acluster 1	m6A.gene.cluster.A	High
TCGA.CM.4751	m6Acluster 1	m6A.gene.cluster.A	High
TCGA.CM.5344	m6Acluster 1	m6A.gene.cluster.A	High
TCGA.CM.5348	m6Acluster 1	m6A.gene.cluster.A	High
TCGA.CM.5349	m6Acluster 1	m6A.gene.cluster.A	High
TCGA.CM.5860	m6Acluster 1	m6A.gene.cluster.A	High
TCGA.CM.5861	m6Acluster 1	m6A.gene.cluster.A	High
TCGA.CM.5862	m6Acluster 1	m6A.gene.cluster.A	High
TCGA.CM.5863	m6Acluster 1	m6A.gene.cluster.A	High
TCGA.CM.5864	m6Acluster 1	m6A.gene.cluster.A	High
TCGA.CM.5868	m6Acluster 1	m6A.gene.cluster.A	High
TCGA.CM.6161	m6Acluster 1	m6A.gene.cluster.A	High
TCGA.CM.6162	m6Acluster 1	m6A.gene.cluster.A	High
TCGA.CM.6163	m6Acluster 1	m6A.gene.cluster.A	High
TCGA.CM.6164	m6Acluster 1	m6A.gene.cluster.A	High
TCGA.CM.6165	m6Acluster 1	m6A.gene.cluster.A	High
TCGA.CM.6166	m6Acluster 1	m6A.gene.cluster.A	High
TCGA.CM.6167	m6Acluster 1	m6A.gene.cluster.A	High
TCGA.CM.6168	m6Acluster 1	m6A.gene.cluster.A	High
TCGA.CM.6169	m6Acluster 1	m6A.gene.cluster.A	High
TCGA.CM.6170	m6Acluster 1	m6A.gene.cluster.A	High
TCGA.CM.6171	m6Acluster 1	m6A.gene.cluster.A	High
TCGA.CM.6172	m6Acluster 1	m6A.gene.cluster.A	High
TCGA.CM.6674	m6Acluster 1	m6A.gene.cluster.A	High
TCGA.CM.6675	m6Acluster 1	m6A.gene.cluster.A	High
TCGA.CM.6676	m6Acluster 1	m6A.gene.cluster.A	High
TCGA.CM.6677	m6Acluster 1	m6A.gene.cluster.A	High
TCGA.CM.6678	m6Acluster 1	m6A.gene.cluster.A	High
TCGA.CM.6679	m6Acluster 1	m6A.gene.cluster.A	High
TCGA.CM.6680	m6Acluster 1	m6A.gene.cluster.A	High
TCGA.D5.5537	m6Acluster 1	m6A.gene.cluster.A	High
TCGA.D5.5538	m6Acluster 1	m6A.gene.cluster.A	High
TCGA.D5.5539	m6Acluster 1	m6A.gene.cluster.A	High
TCGA.D5.5540	m6Acluster 1	m6A.gene.cluster.A	High
TCGA.D5.5541	m6Acluster 1	m6A.gene.cluster.A	High
TCGA.D5.6529	m6Acluster 1	m6A.gene.cluster.A	High
TCGA.D5.6530	m6Acluster 1	m6A.gene.cluster.A	High
TCGA.D5.6531	m6Acluster 1	m6A.gene.cluster.A	High
TCGA.D5.6532	m6Acluster 1	m6A.gene.cluster.A	High
TCGA.D5.6533	m6Acluster 1	m6A.gene.cluster.A	High
TCGA.D5.6534	m6Acluster 1	m6A.gene.cluster.A	High
TCGA.D5.6535	m6Acluster 1	m6A.gene.cluster.A	High
TCGA.D5.6536	m6Acluster 1	m6A.gene.cluster.A	High
TCGA.D5.6537	m6Acluster 1	m6A.gene.cluster.A	High
TCGA.D5.6538	m6Acluster 1	m6A.gene.cluster.A	High
TCGA.D5.6539	m6Acluster 1	m6A.gene.cluster.A	High
TCGA.D5.6540	m6Acluster 1	m6A.gene.cluster.A	High
TCGA.D5.6541	m6Acluster 1	m6A.gene.cluster.A	High
TCGA.D5.6898	m6Acluster 1	m6A.gene.cluster.A	High
TCGA.D5.6920	m6Acluster 1	m6A.gene.cluster.A	High
TCGA.D5.6922	m6Acluster 1	m6A.gene.cluster.A	High
TCGA.D5.6923	m6Acluster 1	m6A.gene.cluster.A	High
TCGA.D5.6924	m6Acluster 1	m6A.gene.cluster.A	High
TCGA.D5.6926	m6Acluster 1	m6A.gene.cluster.A	High
TCGA.D5.6927	m6Acluster 1	m6A.gene.cluster.A	High
TCGA.D5.6928	m6Acluster 1	m6A.gene.cluster.A	High
TCGA.D5.6929	m6Acluster 1	m6A.gene.cluster.A	High
TCGA.D5.6930	m6Acluster 1	m6A.gene.cluster.A	High
TCGA.D5.6931	m6Acluster 1	m6A.gene.cluster.A	High
TCGA.D5.6932	m6Acluster 1	m6A.gene.cluster.A	High
TCGA.D5.7000	m6Acluster 1	m6A.gene.cluster.A	High
TCGA.DM.A0X9	m6Acluster 1	m6A.gene.cluster.A	High
TCGA.DM.A0XD	m6Acluster 1	m6A.gene.cluster.A	High
TCGA.DM.A0XF	m6Acluster 1	m6A.gene.cluster.A	High
[truncated: 4,403 more rows]

## Sheet: Supplementary Table S3
Supplementary Table S3: Enrichment score of KEGG pathways in pan-cancer
Sample ID	KEGG_N_GLYCAN_BIOSYNTHESIS	KEGG_OTHER_GLYCAN_DEGRADATION	KEGG_O_GLYCAN_BIOSYNTHESIS	KEGG_GLYCOSAMINOGLYCAN_DEGRADATION	KEGG_GLYCOSAMINOGLYCAN_BIOSYNTHESIS_KERATAN_SULFATE	KEGG_GLYCEROLIPID_METABOLISM	KEGG_GLYCOSYLPHOSPHATIDYLINOSITOL_GPI_ANCHOR_BIOSYNTHESIS	KEGG_GLYCEROPHOSPHOLIPID_METABOLISM	KEGG_ETHER_LIPID_METABOLISM	KEGG_ARACHIDONIC_ACID_METABOLISM	KEGG_LINOLEIC_ACID_METABOLISM	KEGG_ALPHA_LINOLENIC_ACID_METABOLISM	KEGG_SPHINGOLIPID_METABOLISM	KEGG_GLYCOSPHINGOLIPID_BIOSYNTHESIS_LACTO_AND_NEOLACTO_SERIES	KEGG_GLYCOSPHINGOLIPID_BIOSYNTHESIS_GLOBO_SERIES	KEGG_GLYCOSPHINGOLIPID_BIOSYNTHESIS_GANGLIO_SERIES	KEGG_RIBOFLAVIN_METABOLISM	KEGG_NICOTINATE_AND_NICOTINAMIDE_METABOLISM	KEGG_PANTOTHENATE_AND_COA_BIOSYNTHESIS	KEGG_AMINOACYL_TRNA_BIOSYNTHESIS	KEGG_BASAL_TRANSCRIPTION_FACTORS	KEGG_NON_HOMOLOGOUS_END_JOINING	KEGG_SNARE_INTERACTIONS_IN_VESICULAR_TRANSPORT	KEGG_LYSOSOME	KEGG_CARDIAC_MUSCLE_CONTRACTION	KEGG_RENIN_ANGIOTENSIN_SYSTEM	KEGG_CIRCADIAN_RHYTHM_MAMMAL	KEGG_TASTE_TRANSDUCTION	KEGG_PROXIMAL_TUBULE_BICARBONATE_RECLAMATION	KEGG_PATHOGENIC_ESCHERICHIA_COLI_INFECTION	KEGG_SYSTEMIC_LUPUS_ERYTHEMATOSUS	KEGG_PRIMARY_IMMUNODEFICIENCY	KEGG_HYPERTROPHIC_CARDIOMYOPATHY_HCM	KEGG_ARRHYTHMOGENIC_RIGHT_VENTRICULAR_CARDIOMYOPATHY_ARVC	KEGG_DILATED_CARDIOMYOPATHY	KEGG_GLYCOLYSIS_GLUCONEOGENESIS	KEGG_CITRATE_CYCLE_TCA_CYCLE	KEGG_PENTOSE_PHOSPHATE_PATHWAY	KEGG_PENTOSE_AND_GLUCURONATE_INTERCONVERSIONS	KEGG_FRUCTOSE_AND_MANNOSE_METABOLISM	KEGG_GALACTOSE_METABOLISM	KEGG_ASCORBATE_AND_ALDARATE_METABOLISM	KEGG_FATTY_ACID_METABOLISM	KEGG_STEROID_BIOSYNTHESIS	KEGG_PRIMARY_BILE_ACID_BIOSYNTHESIS	KEGG_STEROID_HORMONE_BIOSYNTHESIS	KEGG_OXIDATIVE_PHOSPHORYLATION	KEGG_PURINE_METABOLISM	KEGG_PYRIMIDINE_METABOLISM
TCGA.2F.A9KO	0.111841	0.30837	-0.423276	0.00865388	-0.106952	-0.318293	0.243552	0.0204932	0.0649408	-0.0213537	0.13815	0.432121	-0.3493	-0.0246149	-0.490292	-0.348714	-0.0353502	-0.342196	-0.217139	0.36594	0.350859	0.507844	0.108735	0.0283487	-0.178529	-0.440362	0.187272	0.0653631	-0.361701	-0.163656	0.449864	0.592798	-0.233534	-0.320842	-0.306037	-0.198068	-0.180177	0.0249118	0.301189	0.077715	0.301441	0.00474928	-0.182974	0.152525	-0.43422	0.078085	-0.272725	-0.179379	0.103487
TCGA.2F.A9KP	0.0952228	0.0515677	-0.0640412	-0.221126	0.194089	0.138278	0.431072	0.28738	0.242176	-0.08577	0.152578	0.167384	-0.149329	0.0267871	0.126248	-0.215069	-0.299384	-0.135298	0.0742822	0.421001	0.378073	0.128642	-0.292019	-0.250115	-0.0105935	-0.334568	-0.309008	-0.105164	-0.225641	-0.147461	-0.401029	-0.529335	-0.369322	-0.386161	-0.396548	0.118571	0.23553	0.209266	-0.0662576	0.0871879	-0.0557188	-0.280243	0.0847716	0.076584	-0.538677	0.0899695	0.117623	-0.0670557	0.111142
TCGA.2F.A9KQ	0.407016	0.461161	-0.289883	0.206256	-0.262223	0.0328168	0.31599	0.268674	0.272791	0.0404856	0.305401	0.376061	0.0194704	-0.0357702	0.310112	-0.150859	-0.270655	-0.181181	-0.0477266	0.328672	0.369353	0.464506	-0.0188901	0.358309	0.184895	-0.482841	-0.191563	-0.192066	0.0126582	-0.164425	-0.369884	-0.579001	-0.228536	-0.296386	-0.27564	0.234862	0.23418	0.372866	0.378932	0.220684	0.491555	0.139454	0.126034	0.243759	-0.301899	0.275024	0.462401	-0.0744707	0.0421572
TCGA.2F.A9KR	-0.176632	0.30512	-0.335862	-0.162765	-0.143091	-0.10126	0.38769	0.132934	-0.0607813	-0.134151	0.0276601	0.261666	-0.37775	-0.260574	-0.339309	-0.212595	-0.288664	-0.318756	-0.31423	0.170973	0.125204	0.289611	-0.102267	-0.143526	0.25658	-0.572554	0.377301	0.191106	-0.380222	-0.414209	-0.0331019	-0.344918	-0.219499	-0.299093	-0.275908	-0.163487	0.143278	0.231823	0.0547085	0.244313	0.14839	-0.150311	-0.169572	0.345945	-0.450617	-0.0152355	0.392052	-0.276872	0.0754712
TCGA.2F.A9KT	-0.426667	-0.528632	0.218444	-0.348147	0.0978316	-0.0241714	-0.314767	0.142937	0.270848	0.322296	0.54092	0.449261	-0.37706	0.271394	0.116068	-0.217412	-0.389531	-0.32059	-0.263864	-0.660644	-0.483917	-0.546641	-0.551304	-0.4989	0.0797605	0.200891	-0.314381	0.451025	-0.186383	-0.134149	0.0551142	-0.0499888	0.242577	0.225312	0.261727	-0.219013	-0.685269	-0.357577	0.334014	-0.0814171	-0.209066	0.234325	-0.430225	-0.425439	0.0106597	0.494775	-0.582122	-0.258147	-0.405327
TCGA.2F.A9KW	0.421559	0.276565	-0.136315	0.299399	0.278931	-0.143531	-0.281873	-0.0704579	-0.341138	-0.117361	-0.266339	-0.260207	-0.0183667	-0.0186992	0.162902	-0.368221	0.266915	-0.362784	-0.121845	0.308916	0.506966	0.28336	-0.160199	0.171113	0.251669	-0.0541681	-0.392264	-0.385268	-0.0395176	0.304558	-0.384862	-0.459965	-0.000724783	-0.00519774	-0.0418151	-0.137196	0.374026	-0.0993059	-0.0992735	0.0834172	0.150944	-0.493605	-0.226419	-0.295248	-0.608641	-0.00379018	0.425841	0.03941	0.17299
TCGA.4Z.AA7M	-0.175374	0.0629833	0.00177625	-0.222767	0.0562994	0.108326	0.235142	0.270984	-0.0214472	-0.0803688	0.164016	0.178564	-0.245286	0.238488	-0.0063884	-0.22252	-0.146128	-0.224816	-0.272963	-0.0234886	0.171632	0.088632	-0.248156	-0.264721	-0.0302824	-0.247639	-0.600149	0.229491	-0.386884	-0.327761	0.107736	-0.264882	-0.262686	-0.264369	-0.273155	-0.2628	-0.476182	-0.312017	0.104742	-0.126188	-0.218928	-0.142457	-0.376183	-0.104912	-0.407145	0.259472	-0.387085	-0.109709	-0.0241237
TCGA.4Z.AA7N	-0.119495	-0.182851	-0.170164	-0.0291096	0.489163	0.00894425	-0.395631	0.188634	0.270095	0.109826	-0.0828425	0.329943	0.104937	0.364157	0.424965	0.324332	-0.465015	0.0511268	-0.223055	-0.405743	0.130065	0.138666	0.047858	-0.109623	-0.124811	-0.330254	0.404554	-0.0917971	-0.396801	0.306213	-0.0593496	0.697013	0.200793	0.0698029	0.257741	-0.458982	-0.450946	-0.362655	-0.300592	-0.365687	-0.236308	-0.322792	-0.323187	0.0517112	-0.278376	-0.230492	-0.487308	-0.206256	-0.363194
TCGA.4Z.AA7O	0.0849718	0.186126	-0.168142	-0.19943	0.123806	-0.120066	0.345202	0.214588	0.179644	0.0390593	0.262795	0.283257	-0.102754	-0.0802253	-0.113205	-0.285481	-0.49233	-0.22904	0.0379708	-0.108877	0.226611	0.0379937	-0.217626	-0.130336	0.00438273	-0.497234	-0.212762	-0.035741	-0.196578	0.0380159	0.0757615	0.150661	-0.203738	-0.16901	-0.169487	-0.139064	-0.0263009	-0.05999	0.321388	0.00354234	0.0410999	0.0433162	-0.0797728	0.244692	-0.508421	0.268348	0.0923692	-0.0954968	0.185442
TCGA.4Z.AA7Q	-0.307131	-0.331726	0.0692786	-0.125652	-0.115333	-0.0351641	-0.23583	-0.131805	0.267556	0.318815	0.444	0.134573	-0.287805	0.431125	0.134803	-0.25564	0.100001	-0.0450998	0.0506516	-0.509486	-0.413298	-0.386873	-0.298533	-0.0906974	0.0461468	0.222004	-0.2812	0.311852	-0.285457	-0.123915	0.365161	0.634709	0.0246639	-0.186449	0.100041	-0.0978149	-0.525302	0.169622	0.465703	-0.202741	0.0840884	0.367994	-0.433721	0.0879376	-0.0616373	0.461245	-0.344645	-0.195804	-0.0830942
TCGA.4Z.AA7R	0.111332	0.146182	-0.468799	0.0674841	-0.262976	0.0465665	-0.0201187	0.118507	0.0239112	-0.0222907	0.158941	0.231159	-0.310683	-0.128117	-0.199978	-0.436484	-0.377353	-0.322477	-0.292683	-0.108896	0.226325	0.177461	-0.313752	-0.166401	-0.0293241	-0.289711	-0.425854	0.159788	-0.128125	0.157804	0.0952317	-0.545832	-0.176114	-0.0682546	-0.157769	0.121172	0.321879	0.396011	0.297073	0.017509	0.258716	0.205784	0.105728	0.102131	-0.415073	0.0290367	0.0755515	0.0747143	0.0728737
TCGA.4Z.AA7S	0.146483	0.139468	-0.117705	-0.320839	-0.159312	-0.11678	0.300173	0.105451	0.111101	0.141477	0.470498	0.440362	-0.205823	-0.00532022	0.333455	-0.35371	-0.135764	-0.0927316	0.174552	0.204107	0.241351	0.257832	-0.0532893	-0.17748	0.296726	-0.383022	-0.285419	-0.037701	-0.191171	-0.108529	-0.0158536	-0.569152	-0.275528	-0.155037	-0.303505	0.234442	0.375955	0.274489	0.280835	0.416068	0.22767	-0.0900171	0.161852	0.32319	-0.412608	0.254659	0.447692	-0.00939828	0.168718
TCGA.4Z.AA7W	-0.261806	-0.327896	-0.140387	-0.223093	0.0810509	-0.0994239	-0.367763	-0.183012	-0.0751102	0.300669	0.231142	0.19828	-0.264595	0.476765	0.224536	0.0052569	0.106108	0.138437	-0.161027	-0.361406	-0.479434	-0.509087	-0.1059	-0.218424	0.241429	0.186653	-0.294336	-0.0204475	-0.344743	0.30086	0.679164	0.599601	0.0276344	-0.141985	0.0459952	0.0255121	-0.365921	0.0831368	0.253657	0.1264	0.20785	-0.0693106	-0.32039	-0.0827507	-0.216584	0.296248	0.38464	0.164561	0.254827
TCGA.4Z.AA7Y	0.131833	0.468573	0.123526	0.140056	-0.100617	0.135364	0.221271	0.27922	0.309922	-0.00578423	0.361149	0.525851	-0.00504289	-0.0187062	0.174568	-0.137719	-0.180979	-0.0100263	0.0588027	0.344822	0.301946	0.588374	0.0122783	0.175061	0.275415	-0.230361	0.00115922	-0.237721	0.242928	0.163572	-0.45562	-0.53277	-0.259117	-0.133398	-0.282674	0.496994	0.525654	0.473983	0.487002	0.467836	0.399581	0.172578	0.425095	0.697078	-0.149852	0.391211	0.484497	0.0350147	0.174749
TCGA.4Z.AA80	0.359571	0.0406814	-0.31936	-0.49056	-0.144138	-0.0442812	0.452647	0.199337	-0.029777	-0.245466	-0.0194393	0.23975	-0.0786587	-0.104825	0.0471238	-0.401594	-0.18345	-0.315794	-0.183133	0.477343	0.48662	0.550366	0.249887	-0.216281	-0.104716	-0.43929	-0.263763	-0.278938	-0.205461	0.0923033	-0.328833	-0.375199	-0.474905	-0.391491	-0.480353	0.0706803	0.3924	0.231545	0.131971	0.040746	-0.201926	-0.0852035	0.233933	0.561103	-0.462152	0.0194219	0.424697	-0.0511248	0.290899
TCGA.4Z.AA81	0.0822543	-0.227927	-0.0562002	-0.463059	-0.0715677	0.104008	0.133784	0.297281	0.0309206	-0.208191	0.038859	0.0387121	0.0142572	0.333492	-0.205083	-0.422399	0.0771116	-0.0771844	0.153828	0.256978	0.102193	0.509908	0.138844	-0.169636	-0.155961	-0.180241	-0.309317	0.204285	-0.156573	0.253043	0.00789808	0.328346	-0.166532	-0.033449	-0.147042	0.027704	0.122861	0.228697	0.311562	0.0899362	0.349185	-0.0901311	-0.196706	-0.434088	-0.538484	0.232459	0.138435	0.0910883	0.425691
TCGA.4Z.AA82	0.102461	-0.411904	0.0242276	-0.376185	-0.243678	-0.187243	-0.325396	0.0185911	0.101891	-0.0689838	-0.0171326	0.161753	-0.122641	0.1253	0.1696	-0.261044	-0.206638	-0.241364	-0.0667069	0.0694055	0.266143	0.248495	-0.037894	-0.215021	-0.0112504	-0.159852	0.132005	-0.117021	-0.257297	0.339836	0.0441073	-0.325915	0.243709	0.215399	0.260151	-0.0205871	-0.157135	0.274794	-0.0826252	-0.202887	0.0591681	-0.0942235	-0.409651	0.524773	-0.494633	-0.0671805	-0.204671	0.0251871	0.263696
TCGA.4Z.AA83	-0.137996	0.443701	0.0911293	-0.170551	0.107839	0.0495548	-0.0241485	0.343395	0.296615	0.184946	0.292756	0.275451	-0.0330296	0.0279154	0.14082	-0.241787	-0.226409	-0.0628771	0.0766825	-0.300422	-0.107779	0.119944	-0.090717	0.159751	0.0278229	-0.13005	0.236058	0.210591	-0.266237	-0.196428	-0.224899	-0.202298	-0.0613148	-0.194601	-0.106402	0.11583	-0.482443	-0.0129205	0.285774	0.289827	0.190785	-0.112383	-0.445009	-0.423598	-0.495939	0.23706	0.11648	-0.0967296	-0.024582
TCGA.4Z.AA84	0.15607	-0.234913	-0.387273	-0.132927	-0.294651	0.0456011	0.16457	0.103424	-0.0264807	-0.236099	-0.274763	0.0183378	0.081656	0.00527394	-0.181888	-0.445084	-0.0758546	0.136286	-0.226709	0.547682	0.433897	0.490096	0.123542	-0.190228	0.105654	0.0033399	-0.528174	0.0291731	-0.128149	0.0434628	-0.322134	-0.480284	-0.166436	-0.27878	-0.244385	-0.0702	-0.15373	0.255145	-0.112298	0.0011999	0.293104	-0.419726	-0.070763	0.368522	-0.49269	-0.144029	0.262164	0.178308	0.330064
TCGA.4Z.AA86	0.207009	0.0496576	-0.303378	0.155168	0.269562	-0.267566	0.029919	-0.142014	-0.101741	-0.260009	-0.424688	-0.315863	-0.158402	-0.00671531	-0.178655	-0.00812166	-0.318456	-0.17057	0.0206354	0.258223	0.271305	0.32439	0.0167688	0.140589	-0.189943	0.005145	-0.58396	-0.203435	-0.434703	0.324344	0.326795	0.460831	0.1133	0.129057	0.130066	0.0399479	0.0685727	0.0805709	-0.273003	-0.105209	0.39377	-0.297872	-0.368236	-0.160732	-0.624	-0.327495	-0.345817	0.0387018	0.35148
TCGA.4Z.AA87	0.288006	-0.279328	-0.219294	-0.517218	-0.364112	-0.0579949	-0.0050715	0.0174597	0.0532381	0.0842523	0.275022	0.581954	-0.174523	-0.0456566	-0.208962	-0.455046	-0.0239319	-0.22212	0.107333	0.410665	0.285053	-0.166588	-0.099551	-0.329359	0.22273	-0.382527	-0.504918	-0.0812547	-0.175085	0.0907139	0.530045	-0.206934	-0.426501	-0.337988	-0.384507	0.145074	0.0565505	-0.120452	0.147736	-0.0462029	-0.0560246	0.00208873	0.241521	0.0374066	-0.519814	0.0554281	0.395795	-0.0648758	0.216688
TCGA.4Z.AA89	-0.125264	0.0547858	-0.0483745	-0.251025	-0.169781	-0.143384	0.311156	0.139961	0.0482427	0.150222	0.435891	0.257295	-0.29968	-0.0579275	-0.127935	-0.229425	-0.239084	-0.132552	-0.142551	0.302674	0.196612	0.425378	0.0638437	-0.112031	0.220016	-0.51443	-0.0648142	0.0646403	-0.27417	-0.116476	-0.00892123	-0.48719	-0.369234	-0.402988	-0.382457	0.164971	0.278097	0.234201	0.414547	0.255591	0.286345	0.125463	-0.112987	-0.0770469	-0.466076	0.384354	0.424296	-0.0825458	0.137575
TCGA.5N.A9KI	0.362782	0.255554	0.0194467	0.248481	0.0349149	0.00728108	0.20088	0.241318	0.151513	0.283519	0.206175	0.252228	0.120915	0.428298	0.300735	-0.0610654	-0.106493	-0.105134	0.21413	0.0219282	0.112572	-0.463801	0.376527	0.375625	0.237162	-0.0273144	-0.246642	-0.150331	-0.269195	0.141012	-0.122577	-0.275418	-0.0979933	-0.267174	-0.081787	0.125203	0.0463037	0.424386	0.263413	0.377286	0.57198	-0.255438	-0.0584785	0.45695	-0.540745	0.122759	0.348113	-0.0758743	0.111558
TCGA.5N.A9KM	0.0182506	0.315154	-0.0496769	-0.0956497	-0.0475276	-0.144477	0.250393	0.047925	0.00553019	0.247504	0.414127	0.315594	0.0107462	-0.0506131	0.427564	0.0706857	-0.251987	-0.109914	0.104012	-0.266756	-0.207067	-0.083578	0.0947346	0.292068	0.302896	-0.426704	-0.352777	-0.213343	-0.115275	0.135885	-0.348505	-0.0596638	-0.190174	-0.225322	-0.260152	0.298841	0.146576	0.490566	0.577224	0.372524	0.288018	0.407582	0.29506	0.46422	-0.372134	0.431344	0.447862	0.0247281	0.0966617
TCGA.BL.A0C8	0.462991	0.261432	0.127261	-0.0091559	0.482307	0.26976	0.330769	0.369726	0.113187	-0.0371733	0.392162	0.0881537	0.12634	0.134971	0.116648	0.162836	-0.0194001	-0.115931	-0.00521681	-0.0748059	-0.0653827	0.400249	-0.0761927	0.118352	0.129309	-0.206501	0.00398703	-0.0703876	0.12271	0.123728	-0.595649	-0.629724	-0.225879	-0.114831	-0.232145	-0.0264243	0.479767	-0.0860731	-0.162136	0.0379119	0.123151	-0.372985	0.277755	0.303498	0.149662	0.0528668	0.405741	-0.119715	-0.0838313
TCGA.BL.A13I	0.227254	0.406975	-0.343753	0.462117	-0.0312111	-0.00780688	-0.0381863	-0.0600892	-0.214563	-0.100061	-0.42959	-0.451403	-0.233759	-0.400814	0.257598	0.305293	-0.151636	-0.161304	-0.0656561	0.454041	0.268329	0.403423	0.273791	0.366212	0.118406	0.438648	-0.682965	-0.341775	-0.388333	0.292134	0.191076	0.399609	0.0561603	-0.0658365	0.103356	0.0648204	0.246611	0.228876	0.228628	-0.0451215	0.255099	0.205214	0.0370413	-0.445095	-0.519876	-0.00011814	0.378099	0.283099	0.422238
TCGA.BL.A13J	0.0787997	0.0385788	-0.0902217	-0.221767	-0.0170302	0.0852707	0.282382	0.0665262	0.135211	0.0951546	0.185684	0.269022	-0.0862529	0.280292	-0.081187	-0.0689914	-0.395522	-0.213282	-0.129647	-0.060781	0.116431	-0.100351	-0.0460941	-0.257098	-0.0152836	-0.217018	-0.423994	0.0494132	-0.208472	-0.134524	-0.136035	-0.512383	0.0164581	0.0410033	0.112459	0.232122	-0.320742	0.107617	0.508889	0.142707	0.391487	0.21611	-0.333943	0.339363	-0.440684	0.421193	-0.268284	-0.126647	-0.0884964
TCGA.BL.A3JM	0.416318	-0.190367	-0.489981	-0.134667	-0.353994	-0.140741	0.512677	-0.0790179	-0.330975	-0.505315	-0.510616	-0.435833	-0.217387	-0.334049	-0.266921	-0.441806	0.0168367	-0.500877	-0.19952	0.583632	0.468568	0.573971	0.161299	0.00190994	-0.242371	-0.320627	-0.282267	-0.175225	-0.286068	-0.0490934	-0.369221	-0.337069	-0.416339	-0.314986	-0.393113	-0.212349	0.255553	-0.370157	-0.41229	-0.33064	-0.21958	-0.52827	-0.103353	0.138301	-0.397594	-0.425301	0.267884	0.172962	0.373895
TCGA.BL.A5ZZ	0.134032	0.179602	-0.0327662	0.512219	0.408151	0.0131028	-0.37338	-0.0745366	-0.157555	0.0115124	-0.0933533	0.00350712	-0.113888	-0.237523	0.414895	0.508853	0.0814723	-0.152802	-0.143293	0.103523	0.0116093	-0.0715718	0.0878612	0.14662	0.123759	0.460896	-0.258315	-0.198726	-0.173869	0.24586	-0.0228774	-0.0781002	0.408397	0.430999	0.399131	0.0980169	-0.253342	0.269491	-0.177559	0.102276	0.364627	-0.326462	-0.296723	-0.212338	-0.181493	-0.144703	-0.200169	0.268288	0.258958
TCGA.BT.A0S7	0.156979	0.0316669	-0.0804796	-0.0198561	-0.293148	-0.0188295	0.410293	0.141718	0.184976	0.103935	0.260941	0.229552	-0.165762	-0.144188	-0.152247	-0.450133	-0.14355	-0.215693	-0.192811	0.403943	0.109235	0.431055	-0.343162	-0.182021	0.0334955	0.136679	-0.469682	0.254525	-0.104831	-0.0978981	0.0314224	-0.15786	-0.278044	-0.246616	-0.19189	0.191576	0.30601	0.164817	0.323899	0.118446	0.128232	0.162563	0.218118	0.253004	-0.286188	0.216015	-0.0535576	0.244955	0.282949
TCGA.BT.A0YX	-0.439748	-0.622793	0.432869	-0.512848	-0.175629	0.260545	-0.45755	-0.0713796	0.259031	0.414159	0.601195	0.239627	-0.315588	0.36113	-0.0371859	-0.261343	-0.317957	-0.230565	0.00621493	-0.487579	-0.24316	-0.0704081	-0.588453	-0.380551	0.347973	0.471517	-0.369787	0.378106	0.242595	0.0491868	0.274956	0.405359	0.0552586	0.218296	0.121095	0.292712	-0.297621	0.23944	0.479717	0.131754	0.04815	0.426047	-0.183558	0.449948	0.170773	0.571152	-0.108487	-0.0998911	-0.211502
TCGA.BT.A20J	-0.528611	-0.425574	0.215897	-0.16669	0.0389797	-0.179195	-0.556147	-0.226918	0.0799412	0.363395	0.420976	0.153681	-0.361869	0.270976	0.220828	0.161215	-0.0165069	-0.131145	0.0303844	-0.480955	-0.225981	-0.385404	-0.374599	-0.370251	0.0281729	0.393471	-0.461201	0.456378	-0.0958004	0.21315	0.573009	0.606534	0.288537	0.351776	0.28363	0.0751548	-0.534789	0.013342	0.26196	-0.230167	-0.446995	0.225894	-0.230889	-0.319095	0.015491	0.301611	-0.499198	-0.159279	-0.219975
TCGA.BT.A20N	0.458564	0.209457	-0.0445297	-0.153298	0.213186	-0.0153428	0.52705	0.186785	0.0517315	-0.0240089	0.102895	0.412955	0.113994	0.0652061	-0.219079	-0.205356	-0.107508	-0.22109	-0.0608916	0.560883	0.373852	0.452573	-0.070435	-0.111798	0.0143965	-0.320933	-0.37856	-0.265666	0.0198274	0.166293	-0.445657	-0.552616	-0.179442	-0.128682	-0.198437	0.254275	0.248398	0.46155	0.379056	0.392318	0.467856	-0.0511275	-0.0736736	0.715333	-0.338616	0.308248	0.108015	0.109863	0.330246
TCGA.BT.A20O	0.208568	0.60531	-0.267814	0.539955	-0.111396	0.143975	-0.387947	-0.0178701	0.0763762	0.112055	-0.129489	0.0465337	0.118661	-0.161803	0.367751	0.584671	0.0408375	0.155275	0.0619389	0.429395	0.174323	0.473038	0.057478	0.33008	-0.259105	0.51673	-0.431142	-0.121819	-0.279767	0.114419	0.224749	0.679197	0.0200304	-0.172663	0.0152747	0.156214	0.122627	0.342687	0.10297	-0.0519658	0.392196	0.0937863	-0.131985	-0.281882	-0.497619	-0.0627445	-0.324871	0.129489	0.264577
TCGA.BT.A20P	-0.0914206	0.0167121	-0.269788	-0.125947	0.234246	0.0131793	-0.184425	0.30001	0.0270697	0.124074	0.281209	0.34287	-0.28817	-0.00777118	0.250042	-0.111447	-0.272016	-0.138823	-0.0801989	-0.049825	-0.125801	0.113094	-0.0722071	-0.131984	0.330382	-0.235374	0.0757211	-0.104563	-0.0255347	-0.133985	0.0167703	-0.263796	-0.265577	-0.20679	-0.210886	0.190882	-0.392262	0.250556	0.382993	0.214591	0.180618	0.0641883	-0.263933	-0.085207	-0.423884	0.344641	0.450562	-0.0643283	0.0284599
TCGA.BT.A20Q	-0.0561713	0.0492975	0.0249754	0.164466	-0.106469	-0.0446192	0.0418837	0.0712557	0.238279	0.133053	0.265091	0.266172	-0.131161	-0.167044	0.182769	0.310959	-0.134963	-0.230023	0.165627	0.346173	0.380065	0.134677	0.175739	0.32988	0.334535	-0.24006	0.267379	-0.188907	-0.167822	0.0900342	-0.308846	0.515873	0.13185	0.209533	0.162749	0.0859555	0.0994801	0.0906911	0.1732	0.224989	0.250746	0.104142	0.0124964	-0.174726	-0.41742	0.19629	0.30587	-0.232727	-0.0741277
TCGA.BT.A20R	0.324889	0.0375657	0.259688	0.0768916	0.140967	-0.190825	0.0897225	0.0831262	0.324147	0.13612	-0.147829	0.0430742	0.169121	0.393284	0.376701	0.0647758	0.176351	-0.0945794	0.105554	-0.236212	-0.0224013	-0.18582	-0.0158806	0.341614	0.158465	0.230961	-0.336173	-0.0522668	-0.453934	0.339283	0.433219	-0.439455	0.165988	0.126419	0.12866	-0.170028	-0.182048	0.0979225	0.0538007	-0.0229299	0.222193	-0.318672	-0.0364519	0.121264	-0.284079	0.119317	0.00735922	-0.123436	-0.0854594
TCGA.BT.A20T	-0.107723	-0.0034557	-0.27262	-0.146003	-0.0724765	0.00934872	0.186627	0.118771	0.0948548	0.204389	0.348437	0.50843	-0.376819	-0.0278855	0.133564	-0.231127	-0.242399	-0.211515	0.100664	0.189447	0.289934	0.447967	0.158838	-0.135678	0.28128	-0.624795	-0.429008	-0.111843	-0.33117	0.00522671	0.414478	0.309789	-0.215905	-0.265237	-0.137623	-0.138885	-0.349893	0.0371319	0.271238	0.0784794	0.203208	0.0833153	-0.0754209	0.217761	-0.377042	0.184768	0.447393	-0.119732	0.127759
TCGA.BT.A20U	0.266396	-0.309172	0.179176	-0.401556	0.0304417	-0.0426086	0.139213	-0.00898138	0.100699	0.0288456	-0.178636	-0.0314695	-0.170376	0.192742	-0.129837	-0.4341	-0.127909	-0.14578	-0.0111264	0.571896	0.473857	0.684264	-0.315032	-0.276825	-0.0322745	-0.227374	0.126939	-0.311318	-0.364501	0.196292	-0.291579	-0.447559	-0.261643	-0.11653	-0.267907	0.319056	0.463942	0.340954	0.3246	0.205662	0.423728	0.336515	0.0757453	0.283129	-0.444493	0.324095	0.262382	0.127869	0.405358
TCGA.BT.A20V	-0.0324097	-0.238694	-0.251323	-0.218504	0.0738435	-0.191897	0.252573	0.13655	0.0757574	-0.148534	-0.239865	-0.0804644	-0.296363	0.0870811	0.135909	-0.0581978	-0.256942	-0.0813296	-0.00651771	0.233662	0.285791	0.382645	-0.17266	-0.179904	0.0527588	-0.416258	-0.460879	0.235808	-0.191	0.0625322	0.0981384	0.184585	-0.0650312	-0.0314064	-0.023418	0.133514	0.0263964	0.38756	-0.145438	-0.0264726	-0.109224	-0.368682	-0.266808	0.475829	-0.265532	-0.0400455	-0.108924	0.0600723	0.310855
TCGA.BT.A20W	0.337401	-0.213382	-0.290048	-0.415504	0.0150835	-0.244478	0.0404696	0.038789	-0.0727964	-0.284719	-0.229564	0.0306264	-0.243079	-0.219536	0.096265	-0.0963092	-0.226915	-0.542154	-0.334009	0.398243	0.392293	0.439723	0.195175	-0.141804	-0.113164	-0.479831	-0.243747	-0.0815917	-0.226198	0.106567	-0.0470868	0.151825	-0.396808	-0.436457	-0.380066	-0.215039	0.0570286	0.0477877	-0.130203	-0.243665	-0.143067	-0.38869	-0.0717464	-0.148556	-0.593493	-0.194293	0.308731	-0.00392718	0.0615113
TCGA.BT.A20X	-0.483783	-0.76861	-0.0224293	-0.381961	-0.244823	-0.289849	-0.26485	-0.107215	-0.0831637	0.0257315	0.287468	0.0132714	-0.132373	0.194144	-0.4659	-0.314184	-0.351033	-0.0115959	-0.100543	-0.345809	-0.00807454	-0.4043	-0.243691	-0.4744	0.311417	0.183992	-0.204607	0.119589	-0.0373604	0.409019	0.169866	-0.196798	0.23272	0.326278	0.252371	0.16132	-0.481106	0.0952737	0.0137336	0.0949323	0.146191	-0.122185	-0.513025	0.0107327	-0.176422	0.357135	-0.116346	0.0919344	0.188838
TCGA.BT.A2LA	-0.0735461	-0.654365	-0.309891	-0.528574	0.0408251	-0.185268	0.0377935	-0.131659	-0.45641	-0.544302	-0.571068	-0.492833	-0.464115	-0.161709	-0.304727	-0.350611	-0.0668763	-0.462189	-0.260862	0.343223	0.442326	0.290887	0.128114	-0.468851	0.216953	-0.580419	-0.458139	-0.366778	-0.434821	-0.0109129	-0.298879	-0.471886	-0.22131	-0.209893	-0.215879	-0.395603	-0.314462	-0.0955838	-0.646768	-0.353826	-0.295924	-0.643824	-0.548648	-0.474648	-0.578123	-0.573501	-0.100432	0.133455	0.146432
TCGA.BT.A2LB	0.116433	-0.110394	-0.175121	0.150262	0.255209	-0.00953098	0.44309	0.261041	0.0421245	0.00140045	-0.129137	0.1579	-0.135587	0.175675	0.0835774	-0.11614	-0.0997588	-0.0551763	-0.179708	0.219766	-0.10962	0.210049	0.173976	0.0378541	0.194824	-0.381761	-0.174136	-0.0384543	-0.304275	0.328904	-0.0629668	0.14536	0.11634	0.143325	0.170094	0.176932	-0.0329651	0.250333	0.231996	0.241637	0.402029	-0.0610267	0.0891126	-0.291504	-0.542646	0.0504582	0.327252	0.10575	0.282494
TCGA.BT.A2LD	-0.208267	-0.291321	-0.115096	0.0337622	0.20901	-0.102611	-0.129964	0.0682874	0.0392279	0.257971	0.349616	0.371531	0.0457335	0.478363	0.1061	-0.241432	0.0940445	-0.150826	-0.0160759	-0.492218	-0.407916	-0.350569	-0.500215	-0.232432	0.204849	0.19189	-0.0605879	0.278801	-0.281223	0.150298	0.325734	-0.00999256	0.287534	0.269174	0.302911	-0.256316	-0.497766	-0.166471	0.502838	-0.139578	0.222334	0.111027	-0.428396	-0.0655483	0.100767	0.46212	-0.438811	-0.143149	-0.0935717
TCGA.BT.A3PH	0.393551	0.527789	0.275767	0.431745	0.378339	0.0188142	0.32543	0.268279	0.320536	0.185196	0.370374	0.37728	0.223485	0.193513	0.588404	0.506876	-0.194591	-0.0103402	0.289038	-0.348142	-0.146314	-0.243549	-0.0996848	0.340603	0.277635	0.0346206	-0.324135	0.0813045	0.10546	0.246664	-0.122383	-0.530826	-0.163209	-0.133272	-0.134068	0.0634761	0.177798	0.213246	0.287543	0.246554	0.340454	-0.393477	-0.05341	0.690769	-0.367419	0.304465	0.230921	-0.109129	0.0342492
TCGA.BT.A3PJ	0.267221	0.470318	-0.195301	0.114635	0.067868	-0.297593	0.26192	-0.118342	-0.245116	-0.195285	-0.245537	-0.393328	-0.00989263	0.220082	-0.331102	-0.198871	0.172972	-0.0552006	0.283023	0.381585	0.292161	0.446808	-0.134739	0.151411	-0.271885	-0.269633	0.146952	-0.260422	-0.411248	0.217379	0.283384	0.11711	0.0444518	-0.00308522	-0.01396	0.184585	-0.027182	-0.0457654	-0.0926897	-0.0138336	0.403344	-0.192071	-0.307732	-0.370623	-0.468692	-0.274569	-0.24159	0.0590407	0.344519
TCGA.BT.A3PK	0.198477	-0.416593	-0.0502202	0.268402	0.339411	0.00197269	0.0920653	-0.0643229	-0.0359909	-0.0555011	-0.255214	-0.117644	-0.295164	0.156453	0.272764	-0.0147614	0.134071	-0.198935	0.04999	0.158631	-0.0604204	-0.0878551	-0.110468	0.0227655	-0.0239286	0.0109164	0.165806	-0.343828	-0.450149	0.426809	0.351678	-0.0390393	0.22321	0.289929	0.254597	0.0416915	-0.0502459	0.171867	-0.35036	-0.116746	0.455151	-0.417642	-0.382864	0.101743	-0.50089	-0.256176	0.0023012	0.150203	0.306339
TCGA.BT.A42C	0.131343	0.435683	-0.282713	0.0649432	-0.023734	0.136271	0.569898	0.233518	-0.0680447	-0.110035	0.212442	0.152177	-0.0948671	-0.245088	-0.102346	-0.266463	-0.0558545	-0.0406998	-0.288856	0.478826	0.469232	0.270696	0.301591	0.323421	-0.0403671	-0.36512	-0.222862	0.0949006	-0.250253	0.178929	-0.361897	-0.485402	-0.373733	-0.384953	-0.414278	0.176537	0.135126	0.361491	0.0769877	0.150642	0.26561	0.0609723	0.286052	0.500739	-0.351451	0.21193	0.52182	0.0629126	0.338714
TCGA.BT.A42E	-0.489438	-0.600771	-0.27004	-0.530488	-0.286966	-0.268943	-0.45908	-0.215682	-0.221104	0.097504	-0.00423794	-0.291544	-0.405696	0.0688433	-0.490674	-0.449409	-0.108616	-0.0326591	-0.223701	-0.388861	-0.060182	-0.316218	0.00422583	-0.425425	0.103376	-0.247454	-0.557377	0.348319	-0.287857	0.256168	0.596268	0.483937	-0.0365679	0.00657751	-0.0492296	-0.0946895	-0.542638	0.117351	-0.16144	-0.186739	0.209483	-0.301872	-0.537623	0.141402	-0.411328	0.132665	-0.253795	-0.00813717	0.168725
TCGA.BT.A42F	-0.00866684	-0.39144	-0.109746	-0.0867796	0.123005	0.0153058	-0.123584	-0.0403973	0.0352028	0.228686	0.29075	0.138659	-0.349632	0.375592	-0.256168	-0.340322	-0.00318275	0.107123	0.156323	0.335003	-0.253267	-0.248607	-0.0781117	-0.0449144	0.189414	0.197336	-0.110815	-0.0866027	-0.32322	0.273522	0.532542	0.599322	-0.203299	-0.263343	-0.263298	0.177351	0.307009	0.435367	-0.00588396	0.161307	0.320767	-0.295905	-0.0936988	0.103306	-0.0115287	0.329409	0.467235	0.256367	0.299328
TCGA.C4.A0EZ	0.136297	-0.511888	-0.491655	-0.392272	-0.0870586	-0.142963	0.376232	-0.179996	-0.358969	-0.449298	-0.412799	-0.187488	-0.38243	-0.162241	-0.348531	-0.348409	-0.158155	-0.303593	-0.14349	0.326372	0.358326	0.581257	-0.0131934	-0.335642	0.241205	-0.35618	-0.344269	0.00438619	-0.169845	0.0186965	0.0176719	-0.594621	-0.292492	-0.34666	-0.30246	-0.277418	-0.0136695	-0.0780892	-0.415916	-0.280337	-0.135954	-0.535937	-0.216407	-0.0355586	-0.476698	-0.447568	0.495372	0.162674	0.317399
TCGA.C4.A0F0	0.350776	-0.450724	0.0463694	-0.296309	-0.0980826	0.0655284	0.400109	-0.0258273	-0.0374834	-0.149207	-0.260136	-0.225526	0.0288002	-0.106965	-0.0910845	-0.0831429	0.0263974	0.0268157	0.166995	0.494434	0.259139	0.349816	-0.169818	-0.290972	0.361256	0.4282	-0.7272	-0.244466	0.280149	0.385943	0.259248	0.132975	0.193583	0.238008	0.157822	0.385287	0.494518	0.354217	0.248559	0.357695	0.39278	0.131992	-0.171923	0.498682	-0.197226	0.195776	0.504663	0.365949	0.48438
TCGA.C4.A0F1	-0.487915	-0.639387	0.108063	-0.100183	0.258501	-0.0473862	-0.398827	-0.143558	0.218982	0.309523	0.441856	0.2526	-0.181268	0.195951	-0.349601	-0.290429	-0.349609	-0.0837808	-0.118609	-0.313535	-0.351598	0.00242766	-0.46038	-0.45972	0.417211	0.380097	-0.00601508	0.20696	-0.0142329	0.0472772	0.234103	0.0487034	0.375133	0.462315	0.316777	0.281468	-0.167852	0.136569	0.133356	0.065186	0.383498	0.224637	-0.221032	0.27248	-0.0578189	0.494636	-0.029456	0.0275142	-0.0501916
TCGA.C4.A0F6	0.462364	0.440739	0.0816786	0.0800167	0.430756	0.0282754	0.495003	0.232182	0.168623	-0.017899	-0.0128663	0.120468	0.118842	0.129015	0.218557	0.312502	-0.0445901	-0.211595	0.149681	0.357076	0.190051	0.0563319	-0.121195	0.116459	0.18749	-0.310371	-0.323031	-0.0216584	0.000889547	0.0763728	-0.304993	-0.569096	-0.312235	-0.265847	-0.339197	0.10256	0.449194	0.262444	0.285487	0.260755	0.358581	-0.0758184	0.246782	0.267954	-0.313222	-0.0340653	0.363724	0.0437921	0.259475
TCGA.C4.A0F7	-0.339959	-0.566948	-0.201017	-0.178772	-0.328554	-0.0974571	-0.0213427	0.144107	0.0772194	-0.0837051	0.228612	0.126076	-0.452434	-0.0432159	-0.458293	-0.421921	-0.494188	0.13	-0.393044	0.358801	0.0265826	0.4496	-0.316649	-0.406912	0.250932	0.161757	-0.427994	0.0199614	0.397169	-0.047434	0.084047	-0.406194	0.0329969	0.0587481	0.0484593	0.11074	0.0842831	0.0577421	0.0948958	-0.12083	0.0311528	-0.0666137	-0.202296	0.370093	-0.372728	0.270346	0.175879	0.113167	0.0975971
TCGA.CF.A1HR	0.335353	0.431457	-0.0789189	-0.0822014	0.141099	-0.0613068	0.440327	0.246766	0.0140433	0.19221	0.160657	0.388923	-0.122387	0.236825	0.140812	0.186205	-0.237263	-0.151057	-0.0632515	0.338216	0.201745	0.420787	0.212162	0.257135	0.215493	0.051403	0.166167	-0.356177	-0.181267	0.2058	-0.418466	-0.116103	-0.30429	-0.289103	-0.316331	0.155239	0.316828	0.282559	0.177256	0.328198	0.341778	-0.105997	0.238394	0.393347	-0.406696	0.0508575	0.521935	0.00890363	0.307879
TCGA.CF.A1HS	-0.429496	-0.677507	-0.0252641	-0.621862	0.446436	-0.256566	-0.516368	-0.110156	-0.033383	-0.0754426	0.169506	-0.17748	-0.391791	0.433812	-0.0921734	-0.3757	-0.173697	-0.110664	-0.23578	-0.110903	0.0698643	0.345308	-0.450997	-0.441204	-0.116891	-0.0889872	-0.31898	0.0813061	-0.0280423	0.354219	0.356712	0.0527022	0.0340212	0.150612	0.11789	0.0692788	-0.17033	0.212375	0.0660865	0.0167199	0.124301	-0.312954	-0.562395	-0.0755096	-0.311225	0.112406	-0.38988	0.157893	0.287602
TCGA.CF.A27C	-0.121197	-0.023914	-0.129399	-0.215793	-0.326682	0.0107875	0.243491	0.168142	0.073689	0.0123427	0.297976	0.303159	-0.309246	0.00812754	-0.00131132	-0.391719	-0.400143	-0.102711	-0.0959269	0.13126	0.387126	0.447467	-0.0550028	-0.164043	0.0877086	-0.504618	-0.132237	0.233907	-0.184056	-0.0338233	-0.511079	-0.460483	-0.353591	-0.315527	-0.390185	0.121127	-0.219602	0.311899	0.259801	0.0987751	0.237481	0.203306	-0.142539	-0.263111	-0.513401	0.315051	0.262285	-0.162772	0.0187371
TCGA.CF.A3MF	-0.43458	-0.259887	-0.281516	-0.126732	-0.432493	-0.00493329	-0.298841	0.31534	0.320413	0.373266	0.516336	0.471342	-0.301248	0.00226071	-0.0884227	-0.46454	-0.518039	-0.0638374	-0.217804	-0.522405	-0.507778	-0.0904375	-0.393001	-0.461813	0.177436	-0.264793	-0.105953	0.0960212	-0.139598	-0.401219	-0.25004	-0.153165	-0.161883	-0.198395	-0.0892824	-0.323398	-0.6647	-0.445445	0.129031	-0.0433141	-0.200455	-0.113676	-0.354191	-0.450707	-0.173911	0.406159	-0.177672	-0.247367	-0.320116
TCGA.CF.A3MG	0.264458	0.380345	-0.21159	0.065927	-0.113744	0.126793	0.364088	0.293395	0.177491	0.0909889	0.382093	0.501502	-0.105618	0.0251064	0.0307017	-0.277447	-0.302194	-0.0231289	-0.0373466	0.108841	0.294684	0.376624	-0.0211042	0.128431	0.263074	-0.214163	-0.175628	-0.191323	-0.0693275	0.107129	-0.264412	-0.574183	-0.337097	-0.269201	-0.31485	0.426711	0.385431	0.569203	0.493372	0.467608	0.567115	0.192666	0.130082	0.515995	-0.479852	0.392624	0.493185	0.0345691	0.248883
TCGA.CF.A3MH	-0.0658166	0.204237	-0.114543	-0.171418	0.080409	0.040868	0.0516631	0.338674	0.25554	0.222767	0.488253	0.535267	-0.333245	0.144568	0.104152	-0.165693	-0.330881	-0.118042	-0.124716	-0.285065	-0.0607633	-0.00193842	-0.216603	-0.057022	0.35411	-0.245155	-0.0528471	0.267499	-0.112175	0.0372374	-0.440337	-0.44524	-0.177103	-0.173468	-0.179093	0.31368	-0.11484	0.448838	0.456074	0.319084	0.364282	0.29292	-0.0859111	-0.188939	-0.550735	0.438393	0.444349	0.0379465	0.0350105
TCGA.CF.A3MI	-0.501385	-0.640735	0.132959	-0.465688	-0.312327	0.0147975	-0.583725	0.0864489	0.245404	0.457013	0.6143	0.462274	-0.31478	0.360695	-0.3392	-0.468891	-0.191828	-0.0357375	-0.0282578	-0.638798	-0.503472	-0.404778	-0.571901	-0.557107	0.401444	0.141317	-0.177394	0.430061	-0.0324097	-0.144549	0.362189	0.0794316	0.082348	0.0521123	0.164583	-0.07234	-0.670732	-0.267767	0.392225	-0.283205	-0.317899	0.398672	-0.304911	-0.284324	0.153816	0.592011	-0.220284	-0.321548	-0.432807
TCGA.CF.A47S	-0.0936308	0.362336	-0.205357	0.0956795	-0.279676	0.157248	0.438645	0.36336	0.190917	0.235024	0.303747	0.247864	0.0129488	-0.026043	0.376927	0.0539716	-0.140069	0.0355178	-0.198582	0.0523597	-0.25789	0.100948	0.0649096	0.166527	0.236807	-0.545729	-0.333098	-0.312598	-0.126422	-0.0123693	-0.485578	-0.296224	-0.353669	-0.37875	-0.371697	0.206083	-0.151285	0.134214	0.32037	0.412086	0.367168	0.123083	-0.0357028	-0.387901	-0.342126	0.326576	0.46513	-0.0546079	0.027222
TCGA.CF.A47T	-0.433904	-0.596652	-0.0458624	-0.435232	-0.363225	0.0494409	-0.118005	0.288176	0.330844	0.486149	0.593808	0.550821	-0.337553	0.12965	-0.105645	-0.293507	-0.276144	0.0823479	0.11756	-0.361765	-0.421506	-0.197848	-0.578709	-0.525155	0.388905	-0.0191784	-0.375622	0.339445	0.0613084	-0.293555	0.164039	-0.209834	-0.121153	-0.144502	-0.085672	0.0396047	-0.427044	0.00548573	0.393086	-0.0397841	-0.096374	0.257169	-0.126991	-0.327442	0.0106197	0.538889	0.244368	0.0357688	-0.0135321
TCGA.CF.A47V	-0.452907	0.111801	-0.293222	-0.082025	-0.358335	0.220039	-0.0335758	0.332798	0.154336	0.193747	0.454231	0.271965	-0.238664	-0.252512	-0.244744	-0.307436	-0.287085	-0.1547	-0.336744	-0.346939	-0.281712	0.313215	-0.189961	-0.065394	0.237636	-0.262485	-0.060076	0.0254981	-0.155198	-0.245044	-0.452391	-0.130278	-0.157801	-0.230902	-0.124397	-0.148483	-0.554918	-0.243513	0.0609706	0.111801	0.0259241	-0.152296	-0.210102	-0.462778	-0.653639	0.271293	0.0844148	-0.064037	-0.0286327
TCGA.CF.A47W	-0.366063	-0.331063	-0.354481	-0.082719	-0.45544	0.0348219	0.0625251	0.229349	0.17166	0.394828	0.442659	0.358015	-0.34523	-0.102013	-0.0712356	-0.100107	-0.0990108	-0.0294843	0.0561956	-0.179823	-0.442801	-0.0785163	-0.147066	-0.190824	0.345434	-0.315807	-0.324885	-0.0677482	-0.07991	-0.199664	-0.239109	-0.255513	-0.219893	-0.338693	-0.226751	0.166643	-0.0783883	0.25472	0.229789	0.0719657	0.0262988	0.0468515	-0.0104913	-0.166369	-0.250957	0.404704	0.590308	0.0825465	0.127596
TCGA.CF.A47X	-0.00530893	-0.0682204	-0.0712309	-0.249333	0.337981	-0.032818	0.408692	0.277008	0.123897	-0.0772127	0.29455	0.314113	-0.140604	-0.0279255	-0.296515	-0.363236	-0.164748	-0.13964	-0.20667	0.178572	0.276629	0.386919	0.0217486	-0.163707	0.315003	-0.427395	0.0583899	0.0332044	-0.0494626	0.10552	-0.535404	-0.43868	-0.37182	-0.392403	-0.337895	-0.147254	0.0156679	0.158596	0.0980819	-0.144995	0.0908452	-0.150241	-0.0525444	-0.134692	-0.517157	0.0656832	0.444049	-0.070741	-0.038255
TCGA.CF.A47Y	-0.345119	-0.0764691	-0.19364	-0.268168	-0.333922	0.00578308	0.0428949	0.313071	0.181094	0.283027	0.41883	0.29695	-0.343354	-0.144036	-0.0884192	-0.154259	-0.271696	-0.0197217	-0.312284	-0.269683	-0.328446	-0.0140866	-0.0722687	-0.155546	0.217734	-0.543236	-0.246825	0.128472	-0.234054	-0.212971	-0.155484	-0.424602	-0.215173	-0.282941	-0.19757	-0.0767034	-0.429648	0.204945	0.17052	0.163596	0.253545	-0.171982	-0.329133	-0.639888	-0.406278	0.262714	0.229385	-0.0626302	-0.165827
TCGA.CF.A5U8	-0.291321	0.273976	-0.0901976	-0.0893806	-0.305644	0.0366798	0.177468	0.375223	0.332207	0.0945188	0.332627	0.377738	-0.082042	-0.0767011	0.0930279	-0.168456	-0.212647	-0.17682	-0.135308	0.128127	-0.165277	0.00788504	-0.0278283	0.0242697	0.268973	-0.571136	-0.316895	0.159572	-0.265451	-0.0609737	-0.426005	-0.417758	-0.320166	-0.386564	-0.335793	0.0255951	-0.18337	0.273339	0.198722	0.196042	0.277086	-0.174075	-0.0682044	-0.5745	-0.37698	0.241997	0.460273	-0.00205147	0.0420438
TCGA.CF.A5UA	0.0120694	-0.100311	-0.0774063	-0.127027	0.22049	0.010698	0.309334	0.295153	0.201494	0.315546	0.399976	0.384969	-0.388875	0.212135	0.489632	0.197958	-0.265753	0.0228639	0.128111	-0.153219	-0.304545	-0.165743	-0.188511	-0.143815	0.456541	-0.164281	-0.586052	0.0435507	-0.162489	-0.130845	-0.117178	-0.279994	-0.242443	-0.286344	-0.225937	0.214945	0.104681	0.279713	0.264285	0.125586	0.307471	-0.0108429	-0.0277067	-0.121554	-0.304005	0.413377	0.540769	0.144321	0.21784
TCGA.CF.A7I0	-0.233563	0.0631316	-0.143345	-0.0803149	0.0955726	0.0423073	0.0928997	0.297434	0.252907	0.325781	0.438506	0.257434	-0.183649	0.219161	0.355512	-0.229547	-0.356668	-0.09565	-0.0354822	-0.192989	-0.227322	-0.00481358	-0.10503	-0.0721087	0.412746	0.121726	-0.274362	-0.104123	0.165719	-0.302315	-0.377249	-0.370057	-0.0544427	-0.126346	-0.0562664	-0.0379079	0.05669	-0.0830951	0.103649	-0.0231082	-0.0188767	-0.232688	-0.0868408	-0.370717	-0.322148	0.267338	0.479825	-0.0637541	-0.0671269
TCGA.CF.A8HX	-0.281237	-0.0384281	-0.537759	-0.390464	-0.458254	0.122282	0.104422	0.342435	0.17997	0.118833	0.307145	0.321239	-0.239554	-0.329423	-0.365371	-0.551015	-0.279959	-0.20407	-0.174138	0.0085024	-0.063118	0.30803	-0.145175	-0.218282	0.0980231	-0.452701	0.121458	0.0228596	-0.370774	-0.315561	-0.374864	-0.416915	-0.288297	-0.345727	-0.310302	-0.124781	-0.435946	-0.169314	-0.192429	0.0117434	-0.200766	-0.37942	-0.194405	-0.291458	-0.469117	0.0849218	0.142483	-0.0997634	0.114833
TCGA.CF.A8HY	-0.304059	0.0751415	-0.196882	-0.133848	0.215094	0.14108	-0.02131	0.28546	0.234413	0.310755	0.463066	0.400757	-0.379806	0.387944	0.393923	0.128281	-0.0622739	-0.0438314	-0.0201194	-0.24938	-0.408871	-0.168813	-0.244633	-0.119175	0.455546	0.134136	-0.417061	0.136226	-0.206207	-0.0788493	0.0425806	-0.21457	-0.0747889	-0.218626	-0.0403799	0.189084	-0.210906	0.291284	0.423057	0.305737	0.224597	0.226564	-0.169295	0.15417	-0.30185	0.442941	0.534815	0.130386	0.206972
TCGA.CF.A9FF	-0.219012	0.351623	-0.271829	0.111745	-0.2533	0.159311	-0.0991221	0.332627	0.321903	0.266695	0.543644	0.612065	-0.152154	-0.0843763	0.0420866	-0.263413	-0.258376	-0.0566894	-0.0751491	-0.281719	-0.308426	-0.308739	-0.236959	-0.145673	0.438696	-0.312055	-0.165674	0.140595	0.0333306	-0.116588	-0.148201	0.043265	-0.018343	-0.0712513	-0.0181133	0.1029	-0.308948	-0.0308278	0.32729	0.198777	-0.211795	0.0626539	0.141387	0.457229	-0.320158	0.335881	0.532382	-0.113194	-0.059429
TCGA.CF.A9FL	-0.11737	0.273599	0.177168	0.0315734	0.305221	0.0433506	0.00972323	0.332849	0.405476	0.176389	0.459374	0.579872	-0.204377	0.140384	0.101783	-0.0890394	-0.238529	-0.165959	-0.328435	-0.383249	-0.271429	0.0817509	-0.345917	-0.0768937	0.297982	0.0761777	-0.561389	0.186628	-0.206712	0.0534638	0.00787789	-0.535612	0.0971394	0.0864844	0.154115	-0.116115	-0.515591	-0.15767	0.356952	-0.215288	0.0383584	0.0423439	-0.204854	0.452961	-0.433199	0.409963	0.0637965	-0.117511	-0.233068
TCGA.CF.A9FM	-0.221004	0.162866	-0.0778611	-0.303971	-0.0979587	0.0952689	0.37123	0.346891	0.214304	0.167983	0.391079	0.326655	0.0374335	0.000700972	-0.200695	-0.153919	-0.0646683	-0.0251439	-0.0399288	0.203947	0.0531156	0.388265	-0.0335663	0.196851	-0.0107483	-0.547989	0.0216458	-0.18845	-0.203356	-0.230873	-0.546005	-0.392287	-0.401229	-0.37049	-0.428645	0.0536675	0.0416338	0.00860287	0.104831	0.0985057	0.29288	-0.0954873	-0.0441646	-0.30912	-0.257167	0.25438	0.346654	-0.218217	-0.131107
TCGA.CU.A0YN	0.0785049	-0.223221	-0.165069	-0.390463	-0.379338	-0.187597	-0.158137	-0.00673224	-0.00957491	-0.103382	0.0938023	0.131179	0.133512	0.0782029	-0.318773	-0.379334	-0.231131	-0.137055	0.234526	0.103887	0.485021	0.445782	0.0896785	-0.253351	-0.3539	0.115653	-0.0244982	-0.0313374	-0.371388	0.227583	0.321456	0.252134	-0.0902835	0.104687	-0.0699594	-0.0542796	-0.4026	-0.0629541	-0.214513	0.070807	0.0692684	-0.52221	-0.458777	0.18179	-0.509126	0.0193117	-0.424128	-0.0353182	0.124857
TCGA.CU.A0YO	0.0816653	-0.424132	0.266844	-0.40462	0.10113	0.0369182	0.14044	0.256216	0.377887	0.211247	0.223699	0.407822	-0.128741	0.304944	0.430672	0.0656981	-0.285813	0.0307616	0.0327864	0.124604	0.263699	0.386546	0.113799	-0.181509	0.380108	-0.145621	0.383477	-0.109499	-0.00580908	0.340073	-0.469849	0.0692642	0.283606	0.267408	0.338267	0.0509986	0.218105	0.0689288	0.209098	-0.070372	-0.105545	0.102226	-0.0579234	-0.437593	-0.25706	0.197246	0.288816	-0.0321853	0.0295866
TCGA.CU.A0YR	0.395656	-0.0467148	0.247289	-0.234171	0.121847	0.0845094	-0.135846	0.0205357	0.271728	0.172487	0.160319	0.193601	0.00264579	0.171243	0.353936	-0.228723	0.16968	-0.200616	0.0922879	0.0238375	-0.0012055	-0.189515	-0.413681	0.0688016	0.293773	0.379241	-0.345102	0.222112	0.224274	0.0644345	0.189262	0.247154	-0.00579253	-0.153191	0.0507347	0.0396455	0.408451	0.0308468	0.433255	-0.197285	-0.118122	0.269585	0.135613	0.486151	-0.244997	0.395374	0.389274	0.0553831	0.269317
TCGA.CU.A3KJ	-0.220864	0.22671	0.168272	0.161085	-0.0446114	-0.233178	0.0905159	-0.108372	-0.212994	-0.202877	0.0220011	-0.125795	-0.229757	-0.0336311	-0.0403263	-0.0658264	0.114163	-0.112516	0.00537455	0.0471083	0.31334	0.16121	-0.0319834	-0.0427617	-0.226121	0.215188	-0.0273947	0.0353161	-0.354983	0.194611	0.305504	0.0319562	-0.0073398	0.133728	0.0418374	0.0622814	-0.4562	0.189324	-0.111654	0.131752	0.251513	-0.586833	-0.476828	0.33438	-0.259573	0.0762291	-0.483289	-0.148626	-0.0242252
TCGA.CU.A3QU	0.284119	0.505916	-0.187074	-0.0236449	0.231481	0.160072	0.515939	0.189851	0.0324063	-0.123175	-0.0709861	0.061151	0.193762	0.262614	0.100015	-0.200675	0.05378	-0.131285	-0.0649487	0.351401	0.425821	-0.0384405	0.264237	0.0338886	-0.00600048	-0.250404	0.00499943	-0.208852	0.0593384	0.0485089	-0.280568	-0.35095	-0.413768	-0.372349	-0.445037	0.0174558	0.286096	0.269589	0.210166	0.239065	0.268853	-0.182821	0.157694	0.265319	-0.200621	0.0953635	0.269073	-0.042483	0.357557
TCGA.CU.A3YL	-0.113897	0.108615	-0.377446	-0.265675	0.0882038	-0.0593172	0.186131	0.256126	-0.0170157	0.0581018	0.383848	0.310627	-0.213028	-0.0262375	0.0515975	-0.278833	-0.271912	-0.0907276	-0.209811	-0.382093	-0.0613963	0.20246	0.165204	-0.133699	-0.0994175	-0.531074	0.415487	0.0192762	-0.4945	-0.327533	-0.492116	-0.32496	-0.329792	-0.382248	-0.351889	-0.260768	-0.502558	-0.245679	-0.263124	-0.18157	-0.0770026	-0.3954	-0.201737	-0.0775519	-0.445146	0.0291395	0.131349	-0.305015	-0.0517975
TCGA.CU.A5W6	0.458001	0.584526	-0.310063	-0.0519398	-0.105865	-0.0540398	0.583558	0.0660434	-0.0960515	0.0210521	0.0558983	0.158845	-0.0165523	-0.043715	0.0481724	-0.145517	0.110806	-0.176793	0.00645395	0.199175	0.127364	-0.18134	0.0595905	0.298951	0.307123	-0.26735	-0.114911	-0.0868851	-0.150065	-0.155457	-0.0198314	-0.420736	-0.407259	-0.414368	-0.416622	0.210953	0.289149	0.197918	0.45028	0.303017	0.419248	0.119079	0.122241	0.454052	-0.370174	0.446329	0.570543	-0.221386	0.177848
TCGA.CU.A72E	-0.266231	-0.244438	0.0275377	-0.124285	-0.353469	0.0154479	-0.0933352	0.0978064	0.319143	0.466966	0.519731	0.409284	-0.432034	-0.100254	-0.0905858	-0.323545	-0.0260691	-0.126405	-0.0760545	-0.296829	-0.120377	0.153227	-0.0545942	-0.159226	0.378682	-0.205901	-0.534787	0.315004	-0.127191	0.102538	0.0350561	-0.457501	-0.0287127	-0.0496673	0.032492	0.256033	0.104472	0.398082	0.368417	0.177044	0.150518	0.0308376	-0.0780883	-0.162772	-0.237828	0.438417	0.496525	-0.029744	0.0943671
TCGA.DK.A1A3	0.380033	-0.0246159	0.319799	0.356358	0.259969	-0.162025	0.310172	-0.0138875	0.336069	0.0888525	0.101456	0.26677	0.218726	0.54252	0.567894	0.151812	0.142078	-0.054957	0.255041	-0.218477	0.0544767	-0.318267	-0.156554	0.309037	0.215386	0.419264	-0.425079	-0.106128	0.120068	0.0439637	0.208717	0.0569479	0.0872607	-0.025949	0.039724	-0.0219291	-0.290726	0.164658	0.431919	0.00341019	0.398162	0.00997134	-0.195111	0.621864	-0.292914	0.168675	-0.193627	-0.110603	0.00623422
TCGA.DK.A1A5	-0.00230686	0.184014	0.339112	0.171149	0.0228913	-0.131508	-0.0561507	0.173859	0.18468	0.0505924	0.271999	0.396842	-0.192884	0.127685	0.22444	0.107747	-0.109194	-0.241964	-0.030749	0.212082	0.352281	0.169923	-0.228842	0.138191	0.0893763	-0.0975279	-0.258765	0.0982436	-0.331388	0.199026	-0.321556	-0.272107	0.288006	0.39909	0.293114	0.0946913	-0.0371839	0.221343	0.258934	0.0522647	0.464546	-0.000610992	-0.155782	0.130414	-0.624418	0.157528	-0.279626	-0.0834428	0.160235
TCGA.DK.A1A6	0.316191	-0.217941	0.0518266	-0.527781	0.0367596	-0.0937086	0.289888	0.112033	0.036158	-0.316301	-0.127479	0.364386	-0.0547553	-0.0325026	0.00759393	-0.0620647	-0.205026	-0.185226	-0.0483354	0.151963	0.414001	0.0389543	-0.0150804	-0.20615	0.118388	-0.321715	-0.264249	0.0879875	-0.173456	0.131903	0.533141	0.126303	-0.302955	-0.296769	-0.291109	-0.115658	-0.0979706	0.245307	0.157272	0.190245	0.126007	-0.327487	0.00482156	0.246314	-0.537395	-0.0208923	0.388464	0.0571768	0.314965
TCGA.DK.A1A7	-0.00811298	-0.555316	-0.408792	-0.571059	0.144936	-0.109297	0.135841	0.0618007	0.00483618	0.082736	0.244431	0.324693	-0.349754	0.00788162	-0.106564	-0.429385	-0.1575	-0.158927	-0.127652	-0.1389	-0.0503031	0.107448	-0.263084	-0.38783	0.343411	-0.453416	-0.275512	-0.0231728	-0.0809021	0.0103387	0.0669597	-0.0482461	-0.306531	-0.359321	-0.29653	-0.0871287	-0.0881629	-0.110474	0.231842	-0.240375	-0.284805	0.234576	0.0846936	-0.383617	-0.500891	0.211181	0.494316	-0.0728688	0.0387016
TCGA.DK.A1AA	0.0173133	0.413722	0.149358	-0.258574	0.00372962	-0.163618	0.138561	0.145161	0.40617	0.115542	0.326745	0.342808	0.00786885	0.058784	0.134148	-0.330971	-0.32518	0.0282516	-0.11527	0.214307	0.214925	0.452453	-0.272123	0.182897	0.0244959	-0.155986	0.0159081	0.0948069	0.0407114	0.0545755	-0.456587	-0.459541	-0.201805	-0.151699	-0.22049	0.188832	-0.0944476	0.173116	0.464382	0.00935656	0.271296	0.140508	-0.184591	-0.396808	-0.140681	0.415905	0.114559	-0.00577513	0.0262142
TCGA.DK.A1AB	-0.263657	-0.672557	0.382892	-0.372753	-0.11075	-0.268016	-0.560511	-0.193328	0.207644	0.169999	0.219726	0.117756	-0.373694	0.101106	0.274084	0.163512	-0.17302	0.17548	-0.0314803	-0.172734	-0.175413	-0.0968392	-0.350333	-0.406361	0.21246	0.071879	0.036382	-0.0374234	-0.127811	0.241279	0.507861	0.250924	0.410408	0.444416	0.4129	0.28772	-0.420806	0.210545	0.101919	0.268369	0.0507401	0.222723	-0.423886	0.140928	-0.0625328	0.245133	-0.474359	-0.190636	-0.368776
TCGA.DK.A1AC	0.137872	-0.246109	-0.460624	-0.26539	-0.16033	-0.135049	-0.187346	-0.124742	-0.166782	-0.167572	-0.176223	0.194081	-0.0253945	-0.0657378	-0.272447	-0.507501	0.152926	-0.218787	-0.00339126	0.410457	0.384947	0.506661	0.260226	-0.29405	-0.0961599	-0.352485	-0.408391	-0.0276554	-0.165664	0.193821	-0.0581489	0.104953	-0.334554	-0.433614	-0.403496	-0.0789867	0.303474	0.0176983	-0.23444	-0.00819697	0.0695722	-0.446997	0.0692053	0.290022	-0.434616	-0.328607	0.330068	0.0108267	0.305289
TCGA.DK.A1AD	0.289535	0.318398	-0.256791	0.0138083	0.121672	0.107078	0.531376	0.157727	0.274627	0.169506	0.380129	0.39611	-0.127297	-0.0802639	0.0303003	-0.332998	-0.0609773	-0.368605	-0.313333	0.320735	0.224946	0.0286423	-0.120489	0.176736	0.273164	-0.362498	-0.173003	-0.156741	-0.211631	-0.0821835	-0.232302	-0.275368	-0.149049	-0.0605011	-0.179737	-0.0493628	0.0564891	0.0205382	0.498789	-0.0477307	0.136046	0.317022	0.251212	-0.159399	-0.470195	0.286175	0.317065	-0.0112684	0.174548
TCGA.DK.A1AE	-0.0675449	-0.561872	-0.286122	-0.478273	-0.177321	0.063225	0.0586767	0.125714	0.0741262	-0.0235713	-0.0087446	0.117853	-0.35377	-0.306823	-0.695279	-0.600004	-0.260845	0.141229	-0.144935	0.608813	0.473514	0.614926	-0.382285	-0.425849	0.0545829	-0.238659	-0.599551	0.0587682	-0.348758	-0.030744	-0.368138	-0.522161	-0.383228	-0.266745	-0.344886	0.187408	0.299293	0.346347	0.385249	0.092615	0.0351346	0.527358	0.218998	0.309408	-0.501145	0.242604	0.348011	0.190276	0.450204
TCGA.DK.A1AF	0.136584	0.13354	0.466037	0.538361	0.47155	0.0552137	-0.390777	0.0663304	0.227911	0.102198	-0.0809401	0.157287	0.214879	0.404042	0.612453	0.422474	0.129865	0.082351	-0.0229817	-0.205091	-0.129528	-0.00479582	-0.0671372	0.282908	0.0824972	0.367433	-0.00855859	-0.0286902	-0.132473	0.438101	-0.205184	0.452557	0.400519	0.429744	0.438416	-0.122084	-0.284519	-0.13071	0.0187616	-0.104153	0.33885	-0.0762565	-0.143995	-0.360593	-0.154873	0.234682	-0.297004	-0.0239655	-0.147834
TCGA.DK.A1AG	0.0984126	0.303432	-0.144659	-0.207588	0.0184086	-0.0318583	0.187734	0.273476	0.0555022	-0.0902639	-0.0964644	0.000223062	-0.263708	-0.0847036	-0.0437369	-0.172803	-0.285288	-0.259048	-0.179774	0.233324	0.148164	0.505215	0.0200616	0.120199	-0.0386323	-0.562545	-0.159634	-0.131242	-0.35324	-0.0936584	-0.234038	-0.301281	-0.37049	-0.359862	-0.359947	-0.0190211	-0.25911	0.262394	0.00281246	0.239512	0.168442	-0.393463	-0.195916	-0.330308	-0.413873	-0.0362052	0.34273	0.0168	0.271404
TCGA.DK.A2HX	0.462731	0.220484	0.301561	0.493816	0.129018	-0.218765	-0.0753554	-0.152	0.112793	0.25618	0.203799	0.158012	0.0901379	0.381341	0.470519	0.242014	0.272212	0.0635135	0.294384	-0.517889	-0.172346	-0.17124	-0.0522994	0.347138	0.219085	0.27365	0.11615	-0.00219517	-0.10026	0.373788	-0.242259	-0.439657	0.450369	0.445795	0.486667	-0.193989	-0.281771	-0.205308	-0.276787	-0.117511	0.246829	-0.371415	-0.404491	0.213101	-0.370456	0.0420874	-0.473546	-0.194373	-0.173722
TCGA.DK.A2I1	0.237883	0.186182	-0.265886	0.0787408	0.126691	0.116621	0.462965	0.186863	0.193477	0.325251	0.30672	0.481356	-0.0957782	0.137661	0.0656932	0.188095	0.224377	0.150278	-0.09765	-0.217582	-0.247933	-0.203019	0.0237148	0.00722863	0.352627	0.147843	-0.609594	-0.0951607	-0.064987	0.156781	0.471606	0.288012	-0.113778	-0.213002	-0.0662398	0.0541035	-0.014155	0.035025	0.226364	0.022794	0.0250299	0.112936	0.211321	0.267867	-0.214185	0.336842	0.548616	-0.102136	0.101844
TCGA.DK.A2I2	0.0804695	-0.109257	-0.183395	0.1206	-0.048827	-0.147532	0.318272	-0.0549602	-0.00331168	0.0190939	-0.158542	-0.166225	-0.302804	0.0521467	-0.018177	-0.0230751	-0.235462	-0.226805	-0.14166	0.35652	0.267044	0.164503	0.106159	-0.0318957	0.285651	0.206196	-0.507782	-0.373833	-0.395642	0.435597	0.215612	0.219166	0.146448	0.149004	0.075071	0.0591543	-0.20163	0.0967079	-0.136157	-0.139336	0.408522	-0.448807	-0.339692	0.175131	-0.300078	-0.0509527	0.430652	0.128383	0.264332
TCGA.DK.A2I4	0.274559	0.438421	0.0916688	0.563568	0.26952	-0.00561613	-0.328934	-0.0377368	0.0142194	-0.0280274	-0.282851	-0.088794	0.0747785	0.303862	0.485744	0.499499	-0.128012	0.156904	0.190144	-0.32748	-0.0155981	0.265761	0.1192	0.462804	-0.218714	0.395704	0.0500043	-0.300673	-0.487282	0.293354	0.285753	0.610959	0.208597	0.139967	0.21806	-0.183871	-0.393062	-0.0779465	0.0834299	-0.108359	0.27965	-0.150159	-0.409994	-0.0350766	-0.365959	-0.0480633	-0.355607	-0.11206	0.116802
TCGA.DK.A2I6	0.131061	-0.157772	0.0377686	0.0418143	0.271511	0.0676129	0.115984	0.141875	-0.211969	-0.232477	-0.391048	-0.177672	-0.0639963	0.0779742	0.25995	-0.362717	0.00734667	0.154298	-0.209761	0.405542	0.121	0.365836	0.0416132	-0.0726275	0.199354	-0.238772	-0.156449	-0.297451	-0.318643	0.208592	0.28822	-0.470667	-0.115415	-0.0940318	-0.0913378	0.105001	0.494002	0.342079	0.0389119	0.127409	0.458015	0.024334	0.160731	0.501331	-0.623384	0.130854	0.386626	0.190135	0.403156
TCGA.DK.A3IK	0.184612	-0.00538275	-0.45932	-0.0529911	-0.0435217	-0.00300614	0.481008	0.206224	-0.0523982	0.0979122	0.160757	0.342182	-0.246	-0.036081	0.0151291	-0.101646	-0.114042	-0.288152	-0.126459	0.291867	-0.161213	0.320422	0.147407	-0.152741	0.232591	-0.608007	-0.278144	-0.0764268	-0.297206	-0.220014	-0.315057	-0.448742	-0.261287	-0.314885	-0.222868	-0.141561	-0.284817	-0.0624892	0.120552	-0.224505	-0.143028	-0.109224	-0.090861	0.00763117	-0.420004	0.107693	0.220445	-0.217522	-0.107459
TCGA.DK.A3IL	0.180877	-0.299669	-0.122115	-0.26969	-0.0468532	0.11689	0.256155	0.252177	0.194061	0.18119	0.317147	0.61093	-0.377968	0.283343	0.0925175	-0.336992	-0.188608	-0.220999	0.0467081	-0.201492	-0.0737361	-0.0519471	-0.285182	-0.339865	0.165355	-0.328046	-0.395449	0.0586238	-0.308805	-0.250605	-0.174153	-0.322928	-0.219388	-0.197679	-0.0436026	0.0342993	-0.11826	0.220346	0.126573	0.351315	0.219759	-0.241377	0.0701364	0.498608	-0.510985	0.114769	0.0992699	-0.0178503	0.147885
TCGA.DK.A3IM	-0.189613	-0.373403	-0.227058	-0.535289	-0.406136	-0.200572	-0.0352997	-0.294854	-0.194535	-0.160616	0.147719	0.0430522	-0.253364	-0.152406	-0.545976	-0.49232	-0.111078	0.00784498	-0.211028	0.459525	0.334001	0.254473	-0.388106	-0.463096	0.000877405	-0.207372	0.104307	0.0651358	-0.134378	0.0886531	-0.0460746	-0.395556	-0.230153	-0.0577263	-0.247381	0.112078	-0.345533	0.340444	-0.232882	0.109767	-0.143762	-0.288935	-0.453576	-0.0250843	-0.405528	-0.0202471	-0.245792	0.149408	0.293355
TCGA.DK.A3IN	0.250106	-0.204087	0.0806913	-0.214201	0.475257	-0.0840565	0.0780707	-0.0895846	-0.0261812	-0.179176	-0.384537	-0.107783	-0.0973793	-0.100765	-0.0491465	0.174965	-0.137502	-0.386173	-0.344744	0.325156	0.373538	0.0519118	-0.0039689	0.0475925	-0.243884	-0.166777	-0.351568	-0.047814	-0.496629	0.507796	0.45888	0.136523	-0.0248469	0.0961294	0.0054151	-0.125598	0.00907919	0.503139	-0.126435	-0.0838966	0.213801	-0.460828	-0.351584	-0.404505	-0.400241	-0.239772	-0.188087	0.089504	0.235678
TCGA.DK.A3IQ	-0.561323	-0.443152	0.396473	-0.0386975	0.140562	-0.0724204	-0.693319	-0.133134	0.2159	0.400466	0.511322	0.4174	-0.245921	0.203289	0.142329	0.0948114	-0.404183	-0.109141	-0.363251	-0.711621	-0.431136	-0.567153	-0.585771	-0.397635	0.00892949	0.39516	-0.0553399	0.439372	-0.14823	-0.0943842	0.282915	-0.040051	0.491977	0.492311	0.515385	-0.145238	-0.694513	-0.362412	0.428677	-0.280656	-0.138785	0.425508	-0.440174	-0.67603	0.089664	0.488374	-0.688455	-0.327345	-0.473275
TCGA.DK.A3IS	0.101626	-0.284895	-0.294528	-0.328113	0.0776244	-0.0157157	0.356994	0.114429	0.0181508	0.0869301	0.29949	0.397171	-0.333594	-0.0672136	-0.183717	-0.337435	-0.292487	-0.120555	0.217605	0.204748	0.398001	0.465082	-0.0604677	-0.275107	0.280496	-0.413589	-0.197702	0.172681	-0.273523	-0.0574317	0.143835	-0.291614	-0.392773	-0.389213	-0.392882	0.185323	0.00627247	0.304941	0.312165	0.192654	0.292911	0.0513764	-0.0377663	0.420505	-0.52168	0.274876	0.463918	0.0746808	0.352843
TCGA.DK.A3IT	0.406821	-0.27656	0.021836	-0.0193781	0.0879224	0.0168125	0.502437	0.152712	-0.0870151	-0.150732	-0.305507	0.0871594	-0.286663	0.108127	0.26944	-0.342629	-0.271401	-0.0793122	-0.214481	0.350804	0.264799	0.378981	0.150596	0.14623	0.243439	-0.253163	-0.499587	-0.0661373	-0.26542	0.263254	-0.104688	-0.110357	0.0907034	0.0636932	0.176257	-0.116435	0.415801	-0.00273038	-0.139171	0.0483518	0.179653	-0.345372	-0.00874574	0.589904	-0.561482	-0.23586	0.419349	0.137667	0.426419
TCGA.DK.A3IU	-0.289808	-0.292817	-0.0536128	0.0105651	0.464374	-0.0381698	-0.627249	-0.0961426	0.00841963	0.298165	0.305726	0.197366	-0.22997	0.456561	0.239678	0.037604	-0.0578883	0.261879	0.142248	-0.524769	-0.372966	-0.37596	-0.327105	-0.144671	0.0558816	0.409581	-0.459948	0.323805	-0.157431	0.129609	0.510513	0.736017	0.401585	0.395011	0.420774	-0.03828	-0.526275	-0.21764	0.158753	-0.151429	0.149487	0.10228	-0.441755	-0.457344	-0.0201288	0.27167	-0.538241	-0.164441	-0.253538
TCGA.DK.A3IV	0.386413	0.369412	-0.174457	-0.252649	-0.0659115	-0.231967	0.489691	0.0698292	-0.267235	-0.306695	-0.326864	-0.201357	0.17575	0.254542	0.36386	-0.111963	-0.215672	-0.296298	-0.0838552	0.514416	0.455545	0.453681	0.452	0.219882	-0.39801	-0.424551	0.000273998	-0.0469663	-0.499552	-0.0337016	-0.386404	0.482176	-0.495602	-0.490127	-0.467421	-0.251521	-0.129192	0.0344552	-0.0954446	0.123034	-0.0673032	-0.386018	-0.229445	0.203615	-0.511674	-0.306256	-0.156111	-0.118295	0.173057
TCGA.DK.A3WW	-0.455783	-0.345091	0.0618322	-0.426964	-0.0653372	-0.318915	-0.251765	-0.181797	-0.084861	0.0586921	-0.0042707	-0.253495	-0.250379	0.282523	-0.146195	-0.488531	-0.0510382	0.28949	0.279607	0.176421	0.117739	0.0543678	0.0303696	-0.204088	0.206495	-0.0171008	-0.479538	-0.0402525	-0.0930395	0.391768	0.560442	0.618259	0.0314374	0.112551	0.010605	0.362997	-0.11148	0.232457	0.177186	0.219219	0.433755	-0.00161967	-0.26222	-0.317457	-0.381871	0.20192	0.332528	0.208184	0.34383
TCGA.DK.A3WX	0.00973812	-0.565355	0.0398765	-0.0889866	0.0295875	-0.171431	-0.0435152	-0.0628517	-0.12703	-0.249966	-0.00500423	-0.0353463	-0.144067	-0.00388618	0.00109716	-0.489248	-0.176646	-0.0378537	-0.027194	0.122573	0.297069	0.350307	-0.0310384	-0.279512	-0.307333	0.178468	-0.108565	0.104253	-0.418633	0.394624	-0.0510688	0.290802	0.128236	0.154913	0.0202618	-0.0521917	-0.0157331	-0.2449	-0.394249	-0.0285568	0.0731486	-0.48028	-0.378596	-0.364979	-0.491472	-0.0805641	-0.438888	0.109876	0.299106
TCGA.DK.A3WY	-0.323185	-0.162779	-0.417063	-0.233754	-0.21751	-0.0910973	-0.539718	-0.112566	-0.118281	-0.0267191	-0.256745	-0.101425	-0.337723	-0.340119	-0.0137236	0.226375	-0.238787	-0.0303092	0.0210328	0.0172882	0.28038	0.512301	0.240391	-0.168949	0.0518084	-0.125648	-0.60554	0.0441657	-0.335791	0.25975	0.549942	0.776896	0.0377026	-0.0887145	0.10761	-0.201934	-0.103332	0.104411	-0.383086	-0.282725	-0.202865	-0.463877	-0.422859	-0.593987	-0.357222	-0.415619	0.144693	0.138122	0.270597
TCGA.DK.A3X1	0.0124936	-0.145332	0.165818	-0.284713	0.00947925	0.0816902	0.322596	0.181678	0.249114	0.221749	0.490403	0.551491	-0.243079	0.280682	0.101587	-0.425774	-0.0662421	-0.0198612	-0.155755	-0.269433	0.0924754	0.278494	-0.245999	-0.254883	0.346019	-0.0729325	-0.368251	0.110554	-0.0945021	-0.00606601	0.0453163	-0.222069	-0.215466	-0.14486	-0.177514	-0.0265751	-0.359144	0.22289	0.419716	-0.231615	-0.0874911	0.0560729	-0.0513075	0.0377694	-0.293981	0.372323	0.265566	0.133204	0.110289
TCGA.DK.A3X2	0.0645728	-0.478839	-0.444888	-0.172834	-0.112179	0.0314826	0.193829	-0.0190879	-0.0866746	-0.214741	-0.174088	-0.0989703	-0.327326	-0.164141	-0.596943	-0.53973	-0.0787214	-0.143233	0.129449	0.498329	0.481256	0.372981	-0.133492	-0.354203	0.114512	-0.386853	-0.316219	-0.225608	-0.125859	-0.158269	-0.0457734	-0.533861	-0.422852	-0.325531	-0.401027	0.264705	0.551483	0.283814	-0.292807	0.30926	0.315213	-0.531328	-0.0829991	0.252124	-0.462756	-0.268986	0.472917	0.0726055	0.365397
TCGA.DK.A6AV	0.475174	0.207878	-0.0743346	-0.196163	0.330175	-0.0257777	0.410803	0.277213	0.139954	-0.161141	0.00052592	0.186379	-0.218665	0.0598867	0.515027	0.212327	-0.159661	-0.25955	-0.0586473	0.390213	0.442001	0.322113	-0.015035	0.0781163	0.0762841	-0.230225	-0.367404	0.0583021	-0.0564871	0.00836658	-0.0465643	-0.125768	-0.339261	-0.305911	-0.29969	0.0812121	0.220213	0.447671	0.2584	0.176696	0.289211	-0.120804	0.0127839	0.0383547	-0.527103	0.091703	0.474426	0.122191	0.383648
TCGA.DK.A6AW	-0.177486	0.146027	-0.309302	0.206087	-0.0251898	-0.166073	-0.20358	0.198786	0.16944	0.167881	0.142681	0.195422	-0.148039	-0.0500823	-0.255385	-0.30446	-0.222639	0.0392089	0.131563	-0.283162	-0.0911077	-0.274004	0.0708931	0.0552798	0.418934	-0.136464	-0.270782	0.0267013	0.282008	-0.164057	-0.132387	-0.482575	-0.158873	-0.23817	-0.131672	0.0529901	0.311938	0.0494064	-0.241589	-0.245579	-0.0707556	0.0236299	0.0801229	-0.277022	-0.291853	0.133692	0.567729	0.0425044	0.148188
TCGA.DK.A6B0	-0.418944	-0.222885	-0.00521992	-0.400711	-0.121207	0.00742156	0.174085	0.29244	0.282584	0.33141	0.43325	0.421151	-0.241777	0.08378	0.0466817	-0.109995	-0.259589	-0.015234	-0.146438	-0.0583279	-0.388582	-0.0714975	-0.294232	-0.237178	0.302356	-0.446475	-0.143519	-0.0154035	-0.0774133	-0.0678748	-0.164089	-0.401258	-0.296786	-0.339177	-0.303263	0.227149	-0.121202	0.247394	0.207702	0.19635	0.203607	-0.0143557	-0.127751	-0.295443	-0.357446	0.420383	0.477288	-0.0186981	0.00812653
TCGA.DK.A6B1	0.285022	0.505909	-0.338581	-0.0391396	-0.202682	0.0482722	0.562625	0.205488	0.0435253	-0.104772	-0.0269387	0.0465919	0.054068	-0.102062	-0.0228294	-0.174831	0.164758	0.0188425	-0.0354372	0.297159	0.414586	0.462327	0.277265	0.0795783	-0.0690284	-0.360828	-0.00783003	-0.108665	-0.095925	-0.0524742	-0.435935	-0.506039	-0.387473	-0.417892	-0.430176	-0.130241	0.344717	-0.00304899	0.183279	-0.0527933	0.0538342	-0.199384	0.274835	0.238218	-0.10888	0.109532	0.371305	-0.0677211	0.332605
TCGA.DK.A6B2	0.36634	0.207082	-0.109001	-0.248818	0.082314	0.00975613	0.0534908	0.160383	0.170043	0.0808401	-0.0446037	0.227304	-0.0468	0.0458913	0.165705	0.209255	-0.11217	-0.0155209	-0.317839	0.0602244	0.238706	0.233315	-0.132257	0.264476	-0.0257626	-0.280267	-0.375989	-0.139682	-0.27372	0.117504	-0.121318	0.456663	-0.0681959	-0.0172336	0.0283382	-0.140534	-0.154551	-0.0391113	-0.0539933	-0.00556185	0.194927	-0.424994	-0.0593757	-0.0116432	-0.592328	-0.0373993	-0.250634	-0.118315	0.00855426
TCGA.DK.A6B5	0.0952447	0.290816	-0.137849	-0.115575	0.155518	0.0735602	0.257955	0.20239	0.0529676	0.178096	0.068014	0.0488055	-0.124466	0.320079	0.394169	-0.146879	-0.370022	-0.293097	-0.196685	-0.364162	-0.00282916	-0.201527	-0.110298	0.0864617	-0.0991154	-0.36387	-0.139972	0.149722	-0.230772	0.216156	0.577321	0.276491	-0.254643	-0.266565	-0.264491	0.108617	-0.295322	0.39916	0.12275	0.170813	0.185757	-0.0428756	0.0668869	0.495538	-0.245971	0.133212	-0.126697	-0.315789	-0.066354
TCGA.DK.A6B6	0.389079	0.371358	-0.0219872	-0.282032	-0.0666592	-0.0398265	0.568965	0.137503	-0.00930814	-0.117292	0.147228	0.164029	-0.113941	-0.0127668	0.276491	-0.133407	-0.130946	0.16414	0.0029749	0.351008	0.302863	0.37478	0.253867	0.120007	0.0692338	-0.469083	-0.217471	-0.107268	-0.189496	-0.0837887	-0.335017	0.233523	-0.480114	-0.470829	-0.500058	0.0315562	0.413326	0.174164	0.37225	0.0201664	0.03848	0.204714	0.192856	0.268582	-0.359065	0.239597	0.367264	-0.202872	0.130687
TCGA.DK.AA6L	0.339641	0.146412	-0.322261	-0.196483	0.355354	-0.0272935	0.526095	0.251926	-0.117716	0.0686598	-0.0882	-0.00589091	-0.405766	0.261782	-0.0511467	0.080915	0.031184	-0.226922	0.211366	0.246988	0.127561	-0.379928	0.184533	0.168615	-0.0939215	-0.515634	-0.110022	-0.245266	-0.198234	-0.0858584	0.0667982	-0.0395819	-0.326555	-0.399647	-0.302987	0.00483875	-0.265811	0.447041	0.287059	0.427914	0.477957	-0.0992944	-0.450556	-0.268113	-0.45254	0.0310103	0.0392785	-0.0639738	0.359931
TCGA.DK.AA6M	-0.089077	0.299487	0.0112382	0.385122	0.247901	-0.177489	-0.0653814	0.0516306	-0.238359	0.0476011	-0.255193	-0.318082	-0.246551	0.22156	0.453906	0.282331	-0.127949	0.0101619	-0.0487719	0.0599791	-0.139062	-0.174895	0.00810729	0.186548	0.272859	0.103976	-0.540502	-0.223557	-0.408171	0.422721	0.459113	0.329125	0.111714	0.0420242	0.0831465	-0.194143	-0.241789	-6.25314e-05	-0.178963	-0.341009	0.165957	-0.359075	-0.445099	-0.241671	-0.607945	0.0453896	0.342425	0.0528229	0.309174
TCGA.DK.AA6P	0.0869027	-0.142032	-0.266929	-0.425931	0.19444	0.135478	0.181181	0.256482	0.06599	-0.0915782	0.0885461	0.274916	-0.286822	-0.01771	0.13697	-0.123554	-0.159431	-0.207062	-0.0573154	0.227228	0.32694	0.0986447	-0.190813	-0.370551	0.240593	-0.412384	0.0375017	0.0131005	-0.0469204	-0.10936	-0.249454	-0.528109	-0.370447	-0.347858	-0.374237	0.139936	0.312424	0.354864	0.258835	0.0216107	-0.035249	0.0750918	0.214164	-0.0715875	-0.475975	0.117006	0.237378	-0.107634	0.0125843
TCGA.DK.AA6Q	-0.00109242	-0.348187	-0.225921	-0.316471	0.555745	-0.0278498	0.194869	0.0809726	-0.280563	0.023226	-0.105355	-0.289465	-0.31785	0.10805	0.181911	-0.0636096	-0.111505	-0.0294207	-0.432659	0.0925192	0.356593	0.0252707	-0.192487	-0.107557	0.0666491	-0.425261	-0.584649	0.184974	-0.140213	0.242198	0.0407087	0.325216	-0.300255	-0.239168	-0.223229	0.0407409	0.099578	0.203813	0.232091	-0.0636561	0.192937	0.260615	-0.241019	0.446603	-0.316938	0.212396	0.356035	-0.0254296	0.279651
TCGA.DK.AA6R	-0.301659	-0.667784	-0.035153	-0.46471	-0.145473	-0.217719	0.0184547	-0.0925574	-0.0975612	0.0785647	0.0564174	-0.163276	-0.0838959	0.382703	0.0290883	-0.320798	-0.240825	-0.0510632	-0.00472462	0.108576	0.350012	0.244407	-0.0226628	-0.37114	0.103961	0.096344	-0.0386363	-0.163542	-0.0755658	0.208652	0.0576985	-0.160313	0.0971049	0.162942	0.119365	0.0247577	-0.032342	0.115009	0.0694208	0.0170659	0.42901	-0.405503	-0.43356	-0.280751	-0.490716	-0.0146323	0.0482474	0.123787	0.349893
TCGA.DK.AA6S	-0.148774	-0.0171892	0.0819284	0.407047	0.354613	0.0423165	-0.312621	0.0153088	-0.0350365	0.073288	-0.0869749	-0.0878284	-0.259514	0.413511	0.478053	0.294493	-0.14713	-0.287216	-0.378195	-0.464216	0.140636	-0.257307	0.244166	0.064212	0.0733258	-0.319765	-0.293446	0.0769879	-0.522216	0.257312	0.142578	0.411548	0.346854	0.385025	0.343271	-0.283996	-0.556631	-0.0334846	-0.262962	-0.281666	-0.190686	-0.0639963	-0.573495	-0.437053	-0.444673	-0.305183	-0.366183	-0.280083	-0.229948
TCGA.DK.AA6T	-0.491167	-0.667502	-0.378891	-0.570758	-0.231049	-0.285011	-0.464999	-0.2121	-0.297927	-0.174434	0.0335241	-0.103229	-0.526157	-0.553229	-0.351285	-0.350137	-0.170198	-0.045592	-0.221342	0.419142	0.282536	0.583987	0.259954	-0.467979	0.131989	-0.331215	-0.651567	0.063971	-0.256415	0.131622	0.251215	0.569788	-0.297281	-0.467382	-0.272974	-0.0194606	0.154488	0.240556	-0.212944	-0.235746	-0.207083	-0.409213	-0.0907543	0.0798368	-0.509254	-0.116133	0.461889	0.287323	0.344163
TCGA.DK.AA6U	0.450403	-0.0212003	-0.203114	-0.269684	0.189782	0.0229215	0.589721	0.242851	-0.240573	-0.403681	-0.35053	-0.0279109	-0.114416	-0.0725217	0.158924	-0.311269	-0.262494	-0.382744	-0.181394	0.453114	0.458684	0.464185	0.244752	-0.0321958	-0.229074	-0.413186	-0.360724	-0.203864	-0.409025	0.0673695	-0.39653	-0.543985	-0.467468	-0.443645	-0.439064	-0.115705	0.231333	0.145194	0.0529761	0.00957759	0.0729987	-0.341315	0.0404551	0.401167	-0.563184	-0.199096	0.361001	-0.0622343	0.334217
TCGA.DK.AA6W	0.150281	-0.437031	-0.319089	-0.285973	0.297685	-0.260779	0.100226	-0.163428	-0.428081	-0.500555	-0.562951	-0.411148	-0.4444	-0.0875376	-0.0814738	-0.0614756	-0.228734	-0.431302	-0.412449	0.525476	0.504476	0.562954	0.235424	-0.248373	-0.199381	-0.552406	-0.128524	-0.28794	-0.360455	0.133904	-0.292962	-0.45867	-0.320903	-0.212243	-0.304047	-0.38928	-0.14152	-0.316696	-0.542349	-0.111024	-0.366535	-0.663816	-0.311414	0.00325575	-0.531293	-0.536231	0.14613	0.177268	0.295253
TCGA.DK.AA6X	0.280004	0.603373	-0.171762	0.204852	-0.377525	-0.321508	0.283995	0.144847	-0.0392416	-0.152864	0.0317353	0.0475815	-0.030788	-0.387159	-0.0610287	-0.129962	-0.351413	-0.0771533	0.00928514	0.331234	0.469294	0.365311	0.283792	0.437426	-0.0511556	-0.337424	-0.26184	-0.108302	-0.286728	-0.0522649	-0.392172	0.280963	-0.297928	-0.410114	-0.360941	0.0897236	0.302872	0.0675185	0.0297416	0.000791092	0.137921	-0.362852	0.0368388	0.337099	-0.222076	-0.0956035	0.450771	-0.25005	-0.0119539
TCGA.DK.AA71	-0.291804	-0.454498	0.207034	-0.515562	-0.00706726	0.0499545	-0.33818	0.0774087	0.232401	0.350713	0.504108	0.517584	-0.124475	0.322333	-0.134467	-0.426485	0.0222137	0.0534076	-0.0366653	-0.174416	-0.324718	-0.0848855	-0.278437	-0.396952	0.380747	0.0848382	-0.24257	0.353208	0.0378698	-0.206556	0.232875	-0.161859	-0.0763084	-0.115916	-0.0937931	0.206389	-0.0311779	0.137098	0.202397	0.155075	0.113545	0.19445	0.258763	-0.0863492	-0.137338	0.476155	0.344083	-0.0204145	0.064875
TCGA.DK.AA74	0.0163622	0.16865	0.0059161	0.280212	0.520363	0.0697806	-0.175178	0.0774789	-0.11309	0.422146	0.0105824	0.128986	-0.211053	0.310755	0.414956	0.410228	0.0131382	-0.0260859	0.176978	-0.340917	-0.412971	-0.315273	-0.00206149	0.253549	0.350427	0.261419	-0.528486	-0.115175	-0.384278	0.36963	0.479585	0.535837	0.302256	0.240909	0.318933	0.140788	-0.382984	0.174041	0.260145	0.0940689	0.395515	0.00560635	-0.145275	-0.135726	-0.047318	0.330812	0.441373	0.147929	0.217601
TCGA.DK.AA75	-0.159113	-0.288277	-0.368227	-0.463813	-0.0753738	0.0350266	0.0648621	0.191664	-0.0783924	0.00427084	0.233126	0.300902	-0.225853	0.176748	-0.0462175	-0.396569	-0.29479	-0.396054	0.0458811	0.258275	0.138403	0.112283	0.06515	-0.402183	0.359382	-0.253481	-0.650404	0.0831445	-0.0739667	-0.00950433	-0.10719	-0.442971	-0.38707	-0.376982	-0.35682	-0.167087	-0.0724879	0.127202	-0.0796352	-0.105353	-0.131941	-0.418712	0.00326168	-0.123439	-0.434303	0.159557	0.516191	0.0785461	0.287067
TCGA.DK.AA76	0.430128	0.0370989	-0.0337761	-0.353505	0.221509	0.241992	0.449142	0.190764	0.00901767	-0.192579	0.0847889	0.268793	0.0544937	0.0220575	-0.220556	-0.0241757	-0.170089	-0.225495	-0.0807908	0.282766	0.512486	0.460216	-0.0397254	-0.278983	0.163852	-0.394862	-0.277043	0.0291866	-0.137311	-0.00449991	-0.43298	-0.569965	-0.423743	-0.344519	-0.433052	-0.137728	-0.149496	0.236778	0.0728917	-0.13549	-0.152747	-0.0454737	0.15892	0.578075	-0.484846	-0.106173	0.203095	-0.204817	0.127187
TCGA.DK.AA77	0.326267	0.370529	-0.200743	-0.173219	0.452172	-0.0645983	0.410624	0.159026	0.1194	-0.0274221	0.255299	0.343157	-0.151704	0.010989	0.395753	0.000940562	-0.261726	-0.125667	0.049249	0.511956	0.485747	0.363499	0.0553891	0.122732	0.0643328	-0.389969	-0.0459724	-0.0741447	-0.116491	0.0841024	0.0814708	0.00642889	-0.358744	-0.328933	-0.34291	0.249967	0.181626	0.355631	0.315884	0.252472	0.414039	-0.053326	0.09144	0.482764	-0.567669	0.210544	0.36707	-0.0249835	0.238348
TCGA.E5.A2PC	0.215972	-0.119855	0.0736962	0.0263187	0.198366	0.182144	0.496183	0.356438	0.0426173	0.0937795	0.20731	0.324436	-0.170374	0.213431	-0.081454	-0.150989	-0.0281281	-0.0624603	0.270809	0.0920321	0.0887097	0.289369	0.0426031	-0.0197646	0.0200187	-0.416157	0.27668	-0.0936137	-0.18541	0.0533198	0.0431332	0.00410118	-0.321188	-0.296211	-0.300118	0.256257	0.0118335	0.51715	0.476984	0.31591	0.46261	0.225617	0.0267126	0.474478	-0.469996	0.387288	0.311226	0.100107	0.352292
TCGA.E5.A4TZ	0.0396821	-0.34451	-0.189836	-0.126852	-0.453014	-0.207465	0.245094	0.0799791	0.190273	-0.23792	0.0934954	0.0401712	-0.214889	0.0418956	-0.0706083	-0.324602	-0.216314	-0.402228	-0.158128	0.20238	0.38962	0.344173	-0.0570983	-0.277701	-0.332506	-0.371549	-0.152513	-0.0365149	-0.335901	0.116708	0.0813566	-0.410027	-0.452872	-0.366851	-0.417911	-0.273942	0.0353116	0.100696	-0.105229	-0.0851182	0.101797	-0.455146	-0.375382	0.225417	-0.404361	-0.129129	-0.239109	-0.172691	0.2342
TCGA.E5.A4U1	-0.31776	-0.209588	-0.535212	-0.383536	-0.12096	0.0566071	0.0214397	0.329932	-0.0890486	-0.023175	0.295883	0.286189	-0.318084	-0.0366366	0.161961	-0.261235	-0.18707	0.02072	0.0664761	0.284164	-0.0895981	0.344097	-0.0862329	-0.271295	0.335953	-0.444272	-0.537968	-0.102777	-0.196291	-0.338575	-0.360416	-0.425907	-0.376742	-0.4158	-0.398707	-0.101114	-0.145511	0.0131586	-0.102975	-0.00178968	-0.322617	-0.444707	0.170959	0.0605958	-0.329235	0.115171	0.429314	0.0236362	0.25631
TCGA.E7.A3X6	0.153246	0.294543	0.113039	-0.127854	0.0779364	-0.166283	0.340778	0.0845321	0.230923	0.0129567	0.000903789	-0.0362119	-0.106805	0.0154594	-0.328696	-0.249464	-0.163238	-0.0378583	-0.0981719	0.171068	0.170915	-0.220975	0.0597008	0.211019	-0.150331	-0.421668	-0.391186	-0.153397	-0.272692	0.11539	-0.0600622	0.313745	-0.218584	-0.218939	-0.211616	-0.0304532	0.233738	0.198722	0.0188565	0.132566	0.188132	-0.102653	-0.331214	0.323955	-0.589717	0.246292	0.166722	-0.0664158	0.28516
TCGA.E7.A3Y1	-0.487856	-0.305427	-0.124286	-0.329303	-0.31447	2.38911e-05	-0.195896	0.306556	0.24709	0.29584	0.454892	0.406132	-0.378454	0.0920023	-0.16587	-0.194733	-0.292023	0.0206158	-0.273511	-0.300515	-0.425008	-0.0713148	-0.246179	-0.463632	0.273633	-0.35466	-0.370478	0.370767	0.0699367	-0.463284	-0.199518	-0.304667	-0.240782	-0.350359	-0.217553	-0.118524	-0.303755	-0.0936897	0.121082	-0.0713124	-0.324472	0.040956	-0.360708	-0.740888	-0.24515	0.430248	0.340737	-0.223108	-0.141475
TCGA.E7.A4IJ	0.339056	0.323052	-0.0393853	0.0219568	0.399948	0.191213	0.568816	0.31231	-0.0319343	-0.169031	-0.17315	0.241441	-0.0744175	-0.0637154	0.0637871	-0.0605073	-0.0902324	-0.169923	-0.181903	0.0960668	-0.0140911	0.0721641	0.209273	0.0320305	0.0104285	-0.427303	-0.484493	-0.140753	-0.176759	0.156328	-0.103473	-0.127018	-0.402711	-0.383835	-0.391022	-0.0316694	0.0852041	0.430977	0.232502	0.0415046	0.194074	-0.00822001	0.0888026	0.400361	-0.363877	-0.0963469	0.356831	-0.0946821	0.189344
TCGA.E7.A4XJ	-0.500414	-0.398726	-0.0525537	-0.369651	-0.255643	0.172048	-0.293456	0.24739	0.21721	0.389715	0.568822	0.483975	-0.163841	0.154815	-0.0490023	-0.47409	-0.146314	0.102169	-0.116992	-0.323582	-0.321184	-0.29349	-0.531276	-0.446618	0.312568	-0.182276	-0.403495	0.245722	-0.0747578	-0.307639	-0.127266	-0.325089	-0.0937847	-0.0598686	0.00776438	-0.0597309	-0.400198	-0.220014	0.219216	0.00306898	-0.120696	0.178178	0.00184574	-0.38912	-0.150264	0.501546	-0.0574716	0.115094	-0.0290325
TCGA.E7.A519	-0.372032	0.0592674	-0.370255	-0.170222	-0.0760352	0.175763	-0.168054	0.307358	0.107025	0.417125	0.393953	0.296774	-0.285371	0.196522	0.237957	0.234367	-0.0635093	0.0647825	-0.0356397	-0.412555	-0.523194	-0.26054	-0.2028	-0.0220892	0.351841	-0.0314492	-0.413687	0.136913	-0.246704	-0.182281	0.23161	0.403872	-0.0617916	-0.2292	-0.0439459	-0.061742	-0.586457	-0.0578937	0.207487	0.218529	0.012893	0.0273151	-0.22331	-0.492894	-0.299072	0.422034	0.404229	-0.0132003	-0.0735723
TCGA.E7.A541	0.493393	0.505055	-0.152072	0.106773	0.230143	0.0600149	0.567129	0.210505	0.072868	-0.019721	-0.0295092	0.198895	-0.0719255	0.285914	0.36613	0.134908	0.224943	-0.252514	0.120264	0.118353	0.121456	0.232648	0.160223	0.348985	-0.044126	-0.464388	-0.0742172	-0.175998	-0.194497	-0.0711121	-0.102399	0.33351	-0.400065	-0.425202	-0.327921	-0.269155	0.0871161	0.0481804	0.14892	-0.203188	0.144777	-0.174149	-0.170067	-0.335283	-0.505836	0.150368	0.370755	0.0749572	0.423022
TCGA.E7.A5KE	0.409466	0.485146	-0.0763072	-0.0106823	0.240546	-0.132366	0.38299	0.134702	0.14242	-0.0875518	0.148264	0.352135	-0.0491467	0.258824	0.300981	-0.235753	-0.273741	-0.077819	-0.0753072	-0.0525336	0.16469	0.272803	-0.162554	-0.147696	0.0316423	-0.238702	-0.604379	0.220839	-0.284655	-0.203878	-0.0834645	-0.587028	-0.433446	-0.434318	-0.440951	-0.230225	-0.229039	0.00364905	0.0830586	-0.242893	-0.0701426	-0.357659	-0.207589	-0.0382815	-0.550994	-0.0240304	0.163325	-0.162112	0.203121
TCGA.E7.A5KF	0.0165823	0.464259	-0.0384534	-0.218935	-0.188894	0.215303	0.436712	0.325983	0.261226	0.133548	0.352906	0.319555	-0.0119473	-0.120892	-0.190304	-0.239993	-0.243095	-0.100201	-0.0652993	0.372327	0.279147	0.539753	-0.0369682	-0.0579907	0.117843	-0.599665	0.0857093	-0.0523564	-0.146636	-0.130796	-0.443434	-0.481359	-0.389971	-0.39036	-0.360807	0.243277	0.264627	0.357002	0.318925	0.170712	0.264492	0.103569	0.0978945	0.31179	-0.339449	0.245199	0.419529	-0.0632559	0.171465
TCGA.E7.A677	0.298448	0.288777	-0.328348	-0.123406	-0.215924	0.0705624	0.402934	0.0998672	-0.213227	-0.114455	-0.103601	-0.0371519	-0.0487118	-0.326394	-0.0412731	-0.361015	-0.266494	-0.0489993	-0.506672	0.249517	0.198114	0.398706	0.134291	0.128548	-0.244994	-0.302426	-0.0490721	-0.3411	-0.183946	-0.0817328	-0.526828	-0.431981	-0.186127	-0.0858298	-0.182619	0.100835	-0.2956	0.205767	0.287646	0.284501	0.0529869	0.236828	-0.202712	0.240389	-0.515087	0.0645086	-0.115144	-0.234551	-0.024009
TCGA.E7.A678	-0.190529	0.195851	-0.089734	-0.279872	-0.195282	0.0953644	0.405607	0.337551	0.234834	0.28182	0.41348	0.435732	-0.258711	-0.0239918	0.0357405	-0.00611406	-0.106974	0.0716059	-0.0358872	0.143284	-0.361857	-0.0109626	-0.0349314	-0.0078908	0.298451	-0.371369	-0.139932	-0.11411	-0.0433005	-0.190884	-0.34188	-0.115907	-0.328637	-0.4481	-0.355698	0.204775	0.141792	0.36701	0.159858	0.156092	0.110848	0.091829	0.0399449	-0.493248	-0.220358	0.406947	0.581973	-0.0237963	0.0764267
TCGA.E7.A6MD	-0.292131	-0.0123397	0.104917	-0.223867	-0.123477	-0.190565	-0.377903	0.0334377	0.318479	0.283936	0.393003	0.555705	-0.0834141	0.0915952	0.0414857	-0.125647	-0.265635	-0.0939115	-0.157098	-0.504685	-0.20918	0.213569	-0.451456	-0.291277	0.325813	0.0585009	-0.354208	0.160511	-0.314147	-0.191341	0.409822	0.505516	0.115591	0.0853215	0.193849	-0.113941	-0.613391	0.0607948	0.294935	-0.2072	-0.0284203	-0.00684096	-0.0624184	-0.426046	-0.0653708	0.337543	-0.022816	-0.182131	-0.25141
TCGA.E7.A6ME	0.254028	0.286812	-0.272213	-0.173362	-0.0350586	-0.064442	0.404985	-0.0176575	-0.356352	-0.431771	-0.446904	-0.176262	-0.14784	0.0216993	-0.301365	0.0826424	0.00081684	-0.296452	-0.29617	0.396452	0.353872	0.209224	0.34214	0.0477916	-0.0642659	-0.50661	-0.329115	-0.204811	-0.131971	0.123727	0.0567964	0.0713098	-0.444182	-0.414191	-0.426643	-0.0857763	0.106511	0.315268	-0.224166	-0.195938	-0.00183106	-0.559655	0.0178492	0.000451036	-0.622797	-0.43929	0.331958	-0.0459188	0.281355
TCGA.E7.A6MF	-0.0650457	-0.0614913	-0.489349	-0.427878	-0.613643	-0.0213645	0.417866	0.223526	0.133025	-0.22645	-0.295013	-0.208898	-0.0253831	-0.279333	-0.308208	-0.443757	-0.369644	-0.0962091	-0.277699	0.233698	0.405997	0.482124	0.0719461	-0.133984	-0.281063	-0.305506	0.268906	0.0358631	-0.310663	-0.290412	-0.57593	-0.515214	-0.318821	-0.270164	-0.35966	-0.279592	0.115265	-0.223245	-0.29631	-0.29868	-0.0697777	-0.250941	-0.0239387	-0.265726	-0.352118	-0.260958	-0.0382732	-0.16712	-0.0638716
TCGA.E7.A7DU	-0.256292	0.203364	-0.0220421	-0.158777	0.117357	0.029134	0.202961	0.256714	0.130446	0.173891	0.416941	0.419376	-0.227283	0.156663	-0.0572459	-0.134289	-0.391075	-0.0927596	-0.146432	-0.167063	-0.191893	0.120875	-0.222603	-0.121458	0.368822	-0.323399	-0.163301	0.139712	-0.175745	-0.0573974	-0.196697	-0.326967	-0.225681	-0.254995	-0.20491	0.0245031	-0.302591	0.339774	0.378159	0.147588	0.111765	-0.0238653	-0.152281	0.215627	-0.444338	0.375549	0.43322	-0.028727	0.0552159
TCGA.E7.A7DV	0.0414814	0.416746	-0.0383611	0.526217	0.317945	0.012003	-0.0267305	0.0843746	0.0342489	0.30853	0.0788513	0.127795	-0.103336	0.224007	0.550773	0.32716	-0.137949	0.262244	0.144446	-0.247058	-0.254177	-0.112043	-0.147718	0.372948	0.328955	0.23051	-0.542595	0.0521877	-0.135428	0.282657	0.584452	0.318209	0.20721	-0.0938908	0.161854	0.279893	-0.0360857	0.502019	0.488788	0.156357	0.43412	0.150224	-0.160519	0.532513	-0.00390432	0.406929	0.396667	0.246719	0.39593
TCGA.E7.A7PW	-0.0864864	-0.043503	-0.444048	-0.0164296	-0.152479	0.13906	0.23732	0.158757	-0.13711	-0.184398	-0.0375435	0.285841	-0.34895	-0.185294	-0.110128	-0.48248	-0.231322	0.00591004	-0.192545	-0.212404	-0.0125097	0.037069	-0.292752	-0.290177	0.232796	-0.454898	-0.544025	0.300357	-0.244538	-0.152142	0.104225	-0.450845	-0.344364	-0.351296	-0.317363	0.0487287	-0.0817359	0.290004	0.298417	0.0130558	-0.0349729	0.0676247	-0.0950773	-0.0603623	-0.529782	0.212281	0.396534	-0.073896	0.156112
TCGA.E7.A7XN	-0.345333	-0.543788	0.018038	-0.505679	-0.127248	-0.129935	-0.100406	0.0376499	-0.078091	-0.129322	0.146498	-0.134388	-0.13388	0.318219	-0.143356	-0.428707	-0.0339306	0.119625	0.454039	0.327931	0.246383	0.254625	0.0251841	-0.30084	0.213645	0.00995157	-0.56289	-0.261755	0.109203	0.316823	0.539373	0.585159	-0.2411	-0.145036	-0.165176	0.254013	0.0905108	0.0841307	-0.300633	0.211678	0.238487	-0.330021	-0.252921	-0.461177	-0.456575	0.0548231	0.347138	0.18	0.391947
TCGA.E7.A85H	0.0989113	-0.0346436	-0.497657	-0.210859	-0.30015	-0.0952291	0.497391	-0.159144	-0.14519	-0.261618	-0.14497	-0.0634355	-0.235421	-0.341955	-0.326962	-0.476124	-0.0435625	-0.0315539	-0.0717224	0.476485	0.246098	0.390982	0.209725	-0.201927	0.246578	-0.440994	-0.377913	-0.229813	-0.171494	0.0930008	0.43986	0.0802857	-0.410263	-0.359942	-0.377203	-0.204013	0.295143	0.0943542	0.190745	0.0945059	0.0515461	-0.175036	-0.118361	-0.0609537	-0.47002	-0.110182	0.47532	0.0115388	0.329768
TCGA.E7.A8O7	0.343156	0.249237	-0.15428	-0.210708	-0.173271	0.264403	0.457319	0.274325	0.00157406	-0.104417	-0.170744	-0.0266973	-0.0803686	-0.0497506	0.368466	0.0179331	-0.146761	0.105316	-0.306843	0.411979	0.359689	0.344535	0.170268	0.174737	-0.237721	-0.39447	-0.118411	-0.169022	-0.256782	0.192182	-0.533979	-0.178577	-0.357438	-0.354955	-0.357743	0.0694366	0.0193716	0.204624	0.194018	0.226412	0.206091	0.11857	-0.00936102	-0.414644	-0.247442	0.0512747	0.0867953	-0.160601	0.0539023
TCGA.E7.A8O8	-0.347773	-0.462342	-0.264794	-0.410424	0.0706901	0.00903045	-0.26856	0.329138	0.258862	0.222081	0.378376	0.392214	-0.256015	0.187945	0.0571525	-0.41766	-0.213243	0.0587666	-0.047895	-0.144844	-0.0560127	-0.386695	-0.378451	-0.378291	0.44593	-0.305879	-0.480004	0.285586	0.033803	-0.205917	-0.0132399	-0.234714	-0.1574	-0.28391	-0.110407	-0.0345997	-0.390295	-0.0315053	0.0163187	-0.292095	-0.297674	0.0582956	-0.0819738	-0.581661	-0.345477	0.388173	0.433797	0.136729	0.200892
TCGA.E7.A97P	-0.154519	-0.454144	0.276823	-0.115506	0.182245	-0.283767	-0.250187	-0.0223336	0.0336137	0.00982517	-0.0694231	-0.0720098	-0.308918	0.330921	0.17063	-0.200698	0.0342495	0.00237111	0.183362	0.223815	0.155064	0.451905	0.122321	-0.072189	0.187229	-0.355956	-0.170277	-0.327803	-0.220918	0.442837	0.134539	0.585994	0.255088	0.378149	0.266397	0.16286	0.22304	0.172278	-0.197288	0.0526384	0.502586	-0.371972	-0.338745	-0.0349052	-0.503644	0.00663773	0.269323	0.0289212	0.335128
TCGA.E7.A97Q	-0.0741994	0.26395	-0.335457	-0.139887	0.224258	-0.0601953	0.109424	0.269743	0.00896583	0.196612	0.267213	0.395745	-0.14222	0.0975133	0.200961	-0.259641	-0.147684	-0.0451534	-0.0735515	-0.575917	-0.226822	0.000196122	-0.0665713	-0.149664	0.0122515	-0.516754	-0.20318	-0.074319	-0.353841	-0.290616	0.0554581	-0.27064	-0.176722	-0.353982	-0.189572	-0.395003	-0.555886	-0.451233	0.209097	-0.156497	-0.0973376	-0.191653	-0.161234	0.167268	-0.382057	0.204611	-0.313191	-0.207651	-0.15084
TCGA.FD.A3B3	-0.0503682	-0.715035	-0.193712	-0.39789	-0.0401007	-0.222727	-0.492047	-0.130158	0.136859	0.0596524	0.197437	-0.00178806	-0.31168	0.0463843	-0.301801	-0.264584	-0.203475	-0.0381781	-0.129911	0.0688298	0.194409	0.185781	-0.318969	-0.261608	-0.0894707	0.418355	-0.110747	-0.11513	-0.361648	0.437624	0.316416	0.631943	0.299245	0.36027	0.298007	0.0851438	-0.294368	0.0145468	-0.409637	-0.0304235	-0.045319	-0.269299	-0.491221	-0.426212	-0.403298	-0.114448	-0.313109	0.0514628	0.115731
TCGA.FD.A3B4	-0.182227	-0.509288	0.268456	-0.026032	-0.0545284	-0.211277	-0.301329	-0.126906	-0.0283584	0.166161	0.328948	0.0756401	-0.318368	0.197823	0.0147728	-0.0870745	-0.230773	0.0194885	-0.604255	-0.533435	0.0949067	-0.28816	-0.288702	-0.304581	0.0788823	0.280809	-0.398741	0.152709	-0.191272	0.137585	0.33079	0.614354	0.363399	0.353856	0.375154	-0.106263	-0.63313	-0.168425	-0.181988	-0.34507	-0.0828593	-0.0170126	-0.544177	0.188134	-0.240897	0.161791	-0.437081	-0.0186018	0.0992176
TCGA.FD.A3B5	-0.313268	0.143416	0.176524	0.17799	-0.25598	-0.0367688	0.021131	-0.0770816	0.0878122	0.186771	0.352951	0.325442	0.294813	0.028652	-0.387016	-0.192713	-0.355958	-0.0926104	-0.00112176	-0.0829077	-0.0808171	-0.201221	-0.433861	-0.163853	0.0378588	-0.0333324	-0.0586405	0.0494688	-0.239091	0.229388	0.269375	-0.336576	0.0681173	0.198908	0.12468	0.264496	-0.334204	0.31154	0.107988	0.372158	0.386522	-0.0506988	-0.235028	0.345288	-0.272345	0.280123	-0.251696	-0.021259	0.183334
TCGA.FD.A3B6	0.173275	-0.149054	-0.109853	-0.18833	-0.090124	-0.288298	0.00143165	-0.0923284	-0.344512	-0.380636	-0.529791	-0.547697	-0.128123	0.189441	0.111485	-0.0209116	-0.181779	-0.00172458	0.229757	0.363834	0.40019	0.519917	0.348889	0.0218323	-0.107123	-0.263399	0.268538	-0.0638065	-0.414042	0.393544	0.283402	0.358437	-0.248762	-0.200336	-0.286325	0.0710763	-0.0148551	0.2966	-0.130985	-0.00890791	0.560151	-0.523343	-0.461831	-0.375984	-0.36858	-0.408108	0.115958	0.0985965	0.378596
TCGA.FD.A3B7	-0.0603431	0.102417	0.323341	0.265997	0.635735	-0.186558	-0.363718	-0.197546	0.015918	0.052708	0.0654357	-0.120296	-0.0884823	0.261349	0.324012	0.389685	0.0751234	0.0364533	-0.0634686	0.026842	-0.236952	-0.232624	-0.204258	0.125371	-0.118654	0.579745	-0.132243	-0.0389456	-0.329147	0.297689	0.420517	0.614058	0.385713	0.386872	0.383999	-0.109043	-0.261004	-0.207969	-0.0705781	-0.0127309	0.0977823	-0.276031	-0.499815	-0.526392	-0.370108	-0.0424079	-0.439272	0.26086	0.210061
TCGA.FD.A3B8	-0.149249	-0.0162295	0.109249	0.264614	0.417291	-0.0659654	-0.547165	-0.114068	0.101383	0.062054	0.048039	0.0989807	-0.108797	0.181045	0.402793	0.437365	-0.196132	0.0406054	-0.109442	-0.378951	-0.13302	-0.238546	-0.154449	0.103275	0.02356	0.457945	-0.00286604	-0.142894	-0.405942	0.264554	0.395077	0.702353	0.539481	0.480304	0.528809	-0.147452	-0.336713	-0.0901174	-0.278269	-0.284667	0.182828	0.083347	-0.382167	-0.626279	-0.198718	-0.112565	-0.495105	-0.0896508	-0.158573
TCGA.FD.A3N5	-0.456511	-0.640646	0.0617971	-0.393149	-0.265573	-0.124357	-0.271341	-0.0240339	0.135886	0.0923429	0.31939	0.269542	0.00621006	0.191081	-0.358937	-0.372244	-0.435684	-0.132364	0.0794562	-0.196809	-0.144606	-0.0313336	-0.436735	-0.416179	-0.14036	0.0263604	-0.306743	-0.027248	-0.129303	0.19294	0.182444	0.00758618	0.146169	0.216635	0.203915	0.184915	-0.106533	0.064173	0.0871175	0.0900198	0.383198	-0.140403	-0.369095	0.518623	-0.330319	0.180423	-0.42424	0.0858276	0.242711
TCGA.FD.A3N6	-0.615932	-0.651535	-0.119541	-0.436865	-0.524681	-0.280773	-0.472664	-0.231904	0.135621	0.21292	0.534147	0.339174	-0.200858	-0.0857908	-0.483708	-0.573159	-0.418176	-0.0785573	-0.176919	-0.248883	-0.0562372	0.289653	-0.513208	-0.573701	0.0402408	0.0465898	-0.340897	0.322792	0.272501	-0.189558	0.404736	0.169985	0.000193154	0.11729	0.029873	0.326205	-0.255788	0.315127	0.229652	0.0430804	0.025897	0.322499	-0.435996	0.174133	-0.241347	0.445968	-0.428542	-0.0627464	-0.0175635
TCGA.FD.A3NA	0.415394	0.317788	-0.0307909	0.128697	0.061495	-0.00474428	0.513877	0.179934	-0.176563	-0.0797797	-0.0659711	0.131048	-0.0163894	0.0129167	0.266887	0.109314	-0.0694719	-0.115163	0.0218736	0.311417	0.376688	0.18393	0.041928	0.142424	0.0557544	-0.259961	-0.38835	-0.384052	0.02096	0.428055	0.0933248	-0.20769	-0.242032	-0.270752	-0.210216	0.0762448	0.0910992	0.478847	0.442811	0.188612	0.400241	0.197606	0.0393331	0.33309	-0.456348	0.36353	0.275111	0.139236	0.365763
TCGA.FD.A3SJ	0.069514	-0.0473387	-0.402132	-0.419473	0.0497956	0.086391	0.307066	0.0574348	-0.145444	-0.0379842	-0.0406033	0.369798	-0.370593	-0.25394	-0.0381412	-0.186095	-0.200252	-0.220056	-0.129335	0.434796	0.3594	0.442577	0.259962	-0.295846	0.371515	-0.276522	-0.511347	-0.0823773	0.0586467	0.229473	0.217004	-0.494348	-0.024907	-0.0309669	-0.0138058	-0.000762277	0.277221	0.0917103	0.24047	-0.130443	0.105871	0.0533525	0.293616	0.0582449	-0.400081	-0.136431	0.343648	0.0145405	0.183966
TCGA.FD.A3SL	0.211876	0.0534641	0.0418663	0.217842	0.221366	-0.177958	0.317512	0.0231766	0.243251	0.25663	0.00712267	0.308884	-0.0508002	0.193592	0.438708	0.266513	-0.101443	-0.126168	0.147413	-0.365064	-0.0535588	-0.307077	0.120506	0.211631	0.303648	0.0369346	-0.0957666	-0.0929968	0.0278694	0.260537	0.186438	-0.430542	0.307727	0.24347	0.327294	-0.163076	-0.153764	-0.00782986	0.222337	-0.2817	-0.0649963	0.0639467	-0.00259965	0.275721	-0.257231	0.163286	-0.0479868	-0.0475915	0.0108599
TCGA.FD.A3SM	0.115521	0.605833	0.0766803	0.406407	0.229797	0.0356723	-0.0105689	0.258039	0.37103	0.374035	0.423704	0.598266	0.1315	0.201143	0.062277	-0.00840462	0.111402	0.00718057	-0.0646949	-0.155477	0.160166	-0.047053	-0.109182	0.383167	-0.149303	-0.16202	0.0813073	0.00143681	-0.236145	0.0988184	0.150277	-0.511098	0.0718694	0.132483	0.0715405	0.369934	-0.199904	0.351808	0.468819	0.475908	0.567597	0.191005	-0.00177293	0.356815	-0.371665	0.36361	-0.313733	-0.0912711	0.0586654
TCGA.FD.A3SN	0.42969	-0.00304095	0.199346	-0.00250448	0.196889	0.0189148	0.165638	0.263331	0.197579	-0.0793767	-0.162737	0.137829	0.0491888	0.175719	0.293054	0.0407417	0.0548869	-0.363885	0.017422	0.342878	0.266434	-0.213074	-0.101187	0.134403	0.177155	-0.471111	-0.260076	-0.123328	-0.221156	0.347253	-0.0741737	-0.229915	0.0633642	0.052756	0.057956	0.0156692	-0.237914	0.26495	0.081719	0.0943309	0.331775	-0.231479	-0.146637	0.579948	-0.527392	-0.0788412	0.308921	-0.00268934	0.371392
TCGA.FD.A3SO	0.0504043	-0.30088	-0.00810733	-0.0582129	0.208369	-0.206333	0.0990737	-0.139211	-0.0879889	-0.150923	-0.078749	-0.0301346	-0.0817832	0.216114	-0.374923	-0.260951	-0.000314924	0.11114	0.0728699	0.318046	0.355644	0.387521	-0.135392	-0.14146	-0.227333	-0.01711	0.186231	-0.294633	-0.388068	0.395275	0.28413	0.107785	-0.0219974	0.0553401	-0.0143641	-0.0154277	0.208843	0.133246	0.0150358	-0.0133105	0.292643	-0.247069	-0.352921	0.26659	-0.487433	0.0738107	-0.374798	0.112303	0.289453
TCGA.FD.A3SP	-0.172174	0.193219	0.114546	0.515806	0.434107	-0.0595796	-0.295409	-0.0159313	0.0423318	0.182326	-0.097876	-0.140956	-0.0796624	0.335548	0.49432	0.381816	-0.474083	-0.226877	-0.128156	-0.438319	-0.112255	-0.0582238	-0.0607952	0.136067	-0.153591	0.395278	-0.249291	0.0225688	-0.536389	0.325065	0.218324	0.429109	0.482916	0.491106	0.482756	0.0365425	-0.575588	-0.175283	-0.1722	-0.108181	0.173313	-0.0409779	-0.392802	-0.6436	-0.0610765	-0.0530795	-0.628723	-0.192014	-0.196001
TCGA.FD.A3SQ	-0.0675489	0.49969	-0.0171754	0.525755	0.326484	-0.0439596	0.0286991	0.0872012	0.0139563	0.385214	0.427038	0.208607	0.0224267	-0.0906514	0.54644	0.417058	-0.397023	-0.112808	-0.157993	-0.266124	-0.169209	-0.355144	-0.0861579	0.4589	0.24433	0.000643047	0.29038	-0.0474255	-0.119942	-0.15479	0.0562522	-0.0566786	0.411955	0.359998	0.447502	-0.0215078	-0.403157	-0.156493	0.49219	0.0438816	0.24366	0.525741	-0.112602	0.00963387	-0.277847	0.362488	-0.304398	-0.170798	-0.269136
TCGA.FD.A3SR	0.366847	0.545446	-0.219092	0.259699	-0.274774	-0.153158	0.390034	-0.0470335	-0.00490728	-0.135965	-0.381877	-0.0242004	0.0392071	0.404425	0.409376	-0.101023	-0.0546233	-0.346765	-0.0398132	0.105421	0.299072	0.123091	0.323298	0.317705	-0.178073	-0.0516495	-0.608809	-0.191459	-0.447027	-0.0346608	0.147088	0.278069	-0.0475047	-0.116856	0.00211439	-0.376156	-0.320023	-0.367671	-0.384764	-0.287054	0.13347	-0.611022	-0.278066	0.123752	-0.503057	-0.445617	-0.373284	-0.29548	-0.0730678
TCGA.FD.A3SS	0.15721	0.230488	-0.292721	0.179403	-0.0922771	-0.286241	0.323952	-0.0737978	-0.142277	-0.17393	0.0899021	0.222532	-0.139115	0.312748	-0.0215202	-0.312523	-0.217887	-0.192477	0.215315	-0.250324	-0.0221114	-0.45523	0.216948	-0.0330657	0.158102	-0.152371	-0.237977	0.246016	-0.215069	0.110791	0.111087	-0.540856	-0.158514	-0.185012	-0.0882423	-0.100428	0.0665247	-0.0447035	0.409266	0.00375302	0.289714	-0.3465	-0.363366	0.303951	-0.546894	0.109333	0.0555213	-0.0548674	0.210778
TCGA.FD.A43N	-0.14129	-0.106765	-0.2428	-0.206887	0.194399	-0.00846659	-0.0514072	0.14038	0.248565	0.208651	0.433279	0.472966	-0.248234	0.394021	0.0276585	-0.07608	-8.91395e-05	-0.234082	-0.0858553	-0.268842	-0.283798	-0.242657	-0.36518	-0.182069	0.178463	0.0703345	-0.162663	0.27052	-0.157571	0.159618	0.453757	-0.280219	-0.0665453	0.0457623	0.0210438	0.0906307	-0.458079	0.0565087	0.384955	0.333637	0.211225	0.10263	0.0280375	0.0747642	-0.32908	0.325729	-0.0915392	-0.241775	-0.218518
TCGA.FD.A43P	0.0709553	-0.429036	-0.127954	-0.432847	-0.174339	-0.127801	0.146885	-0.218666	-0.281152	-0.310375	-0.328431	-0.142233	-0.231691	0.17528	-0.166774	-0.328624	-0.174244	-0.30536	-0.287735	-0.0909369	0.0397047	-0.120331	-0.343385	-0.283408	-0.237791	-0.418462	-0.383678	-0.0626057	-0.396904	0.234968	0.595697	0.686775	-0.421261	-0.37886	-0.374824	-0.165007	-0.316729	0.319798	0.145345	-0.156364	-0.0189108	-0.270212	-0.160017	0.248732	-0.454967	-0.347403	-0.304434	-0.15192	0.0497776
TCGA.FD.A43S	-0.289244	0.175368	-0.242312	-0.0301109	0.120153	0.107483	-0.155307	0.23427	0.249003	0.49253	0.363348	0.48925	-0.2014	0.0735667	0.43818	0.340831	-0.25421	0.185735	0.0326577	-0.352746	-0.453057	-0.229036	0.113458	0.158323	0.341335	0.101307	-0.407487	-0.229569	-0.203476	0.0991505	0.0940571	0.644538	0.0775317	-0.118158	0.135299	0.0433729	-0.25967	0.229098	0.104927	0.134095	0.173017	0.251751	0.119193	-0.42062	0.0676236	0.383846	0.464484	0.0211919	0.0451178
TCGA.FD.A43U	-0.176595	0.133319	-0.337837	0.365225	0.217051	0.225066	-0.282269	0.206838	0.221966	0.486313	0.374855	0.502583	-0.181914	0.26407	0.311491	0.341578	0.0452347	0.0915447	0.244814	-0.445048	-0.366262	-0.423333	0.134713	0.238458	0.35841	-0.0542256	-0.500465	0.0822989	-0.305423	0.0189415	0.310497	0.493766	0.110051	-0.0779708	0.140107	0.0662691	-0.528415	0.0197077	0.316436	0.219793	0.238419	0.189494	0.0762206	0.20133	-0.305757	0.262161	0.382192	-0.018346	0.0874275
TCGA.FD.A43X	-0.217606	0.0250191	-0.131697	-0.256629	-0.0740504	0.0534184	0.131155	0.262413	0.0688225	0.0940012	0.366576	0.363381	-0.35462	0.100118	-0.089771	-0.188919	-0.161624	-0.16069	-0.195868	-0.0384973	-0.00749058	0.0641554	-0.136952	-0.1512	0.147908	-0.490939	-0.170219	0.0402798	-0.17482	-0.0547249	-0.366858	-0.450962	-0.234614	-0.245761	-0.195846	-0.0895598	-0.436505	0.218459	0.235459	0.220746	-0.051052	-0.112757	-0.365351	-0.320296	-0.52031	0.233247	0.159529	-0.0113933	0.091261
TCGA.FD.A43Y	-0.033844	0.0987233	0.164875	0.105867	0.0830215	0.0479792	0.116633	0.139228	0.171933	0.229456	0.194733	-0.083877	-0.0300099	0.227329	0.238554	0.320108	0.153884	-0.0048958	0.136997	0.125074	-0.233774	0.045896	0.00606005	0.197622	0.109041	0.0224418	-0.286303	-0.0771856	-0.105908	0.234086	0.13165	-0.00559308	0.145208	0.15115	0.0532581	0.0845174	-0.382252	0.337618	0.336626	0.0581568	0.407888	0.227573	-0.355302	0.113941	-0.116321	0.292063	-0.10568	0.0376713	0.319586
TCGA.FD.A5BR	0.257068	0.041179	-0.152885	-0.12458	0.523192	-0.0321941	0.330215	0.318483	0.29524	0.227545	0.23079	0.39994	0.00752899	0.217898	0.344047	0.232037	-0.460286	0.00767316	0.0358448	-0.0734237	-0.118222	-0.140265	-0.179264	-0.0573774	-0.0994739	0.0109342	-0.357887	-0.0655769	0.0286599	0.113773	0.103693	0.391009	-0.0889592	-0.0236406	-0.0382653	-0.281411	-0.331721	-0.218068	0.172946	-0.0338265	0.0401578	-0.128045	-0.0146621	-0.184174	-0.382882	0.232004	-0.221315	-0.0801817	0.0479461
TCGA.FD.A5BS	-0.463451	0.00105877	0.102422	0.0467062	0.146818	-0.0439091	-0.623134	-0.0641993	0.145282	0.516068	0.482726	0.219155	-0.142587	0.32412	0.270884	0.238449	-0.0958819	0.0471482	0.170799	-0.564179	-0.526197	-0.448431	-0.158588	-0.0642485	0.237254	0.271201	-0.401384	0.346303	-0.164439	-0.134585	0.50182	0.750635	0.227938	0.142816	0.281059	-0.0527113	-0.592649	-0.0185322	0.412277	-0.0751076	-0.175174	0.34809	-0.406062	-0.412759	0.141107	0.501311	-0.342944	-0.155622	-0.248557
TCGA.FD.A5BT	-0.08106	-0.197658	0.0906863	0.206673	0.450575	-0.104797	-0.202725	0.0505999	-0.0409531	0.431545	0.334913	0.131195	-0.260512	0.445463	0.373453	0.323932	-0.0440012	0.119187	0.0806075	-0.496638	-0.542201	-0.450353	-0.114467	0.112981	0.321317	0.411783	-0.510981	0.0448053	-0.38516	0.158909	0.498518	0.561783	0.269519	0.131084	0.283361	-0.0754984	-0.506944	0.136795	0.224912	0.181352	0.256673	0.0313538	-0.365472	-0.456488	-0.0287138	0.374368	0.234707	0.113524	0.21124
TCGA.FD.A5BU	-0.386942	-0.436955	0.228869	0.0345548	0.0658127	0.112919	-0.355274	0.0279963	0.0881733	0.331565	0.302598	-0.0328962	-0.117608	0.36011	-0.182709	0.165915	-0.0573566	-0.0588175	-0.252056	-0.0333468	-0.389481	-0.38997	-0.439026	-0.0437425	0.110396	0.437878	-0.536225	-0.0612347	-0.248505	0.350441	0.542527	0.367365	0.441825	0.425247	0.422338	0.170962	-0.424993	0.283247	0.124617	0.091099	0.285363	0.387526	-0.153423	0.141218	-0.0674325	0.46813	-0.376871	-0.0267716	0.136473
TCGA.FD.A5BV	0.372274	0.433171	-0.213569	0.102312	0.294494	0.00999992	0.56985	0.347066	0.0412019	-0.122082	-0.0333188	0.124695	-0.0152662	0.00548945	0.468068	0.179886	-0.0697632	-0.207087	-0.0118834	0.169481	0.268678	0.0316533	0.295479	0.186059	-0.0309031	-0.41297	-0.351403	-0.00770695	-0.164828	0.0247879	-0.407397	-0.530769	-0.378283	-0.355987	-0.39373	-0.136587	-0.296091	0.211706	0.232241	0.0912112	0.185483	-0.168215	0.039345	0.176775	-0.243701	-0.00260341	0.302131	0.0755296	0.289486
TCGA.FD.A5BX	-0.389199	-0.150192	-0.0875634	0.56855	-0.0678914	0.00283697	-0.457389	-0.0584964	-0.121748	0.382696	0.317243	0.049346	-0.17132	0.0945366	0.360129	0.452076	0.0474113	0.196792	0.218618	-0.468753	-0.506574	-0.575372	-0.402753	0.097306	0.390135	0.478618	-0.610967	0.230645	-0.161944	0.142118	0.30047	0.335879	0.325199	0.230846	0.346258	0.098752	-0.43244	-0.167659	0.186189	-0.0786098	-0.0612187	0.245165	-0.331788	-0.376672	0.274639	0.430462	0.279163	0.06471	-0.0621739
TCGA.FD.A5BY	0.166953	-0.144923	0.0363846	-0.280783	0.396005	-0.141554	0.362278	0.154267	-0.0668139	0.0468602	-0.126637	-0.0865638	-0.170294	0.0795274	-0.0961598	0.0571593	0.256303	-0.334886	0.249128	0.401805	0.469195	-0.0331462	0.0581201	0.133762	0.0551001	-0.0460658	-0.116598	-0.241806	-0.205142	0.236241	0.285221	-0.306678	-0.0899403	-0.0779607	-0.167416	0.15401	0.038307	0.398139	-0.0561461	0.300376	0.239008	-0.182151	-0.105496	-0.026623	-0.334865	-0.0227474	0.28508	0.0379733	0.421439
TCGA.FD.A5BZ	-0.172082	0.213276	0.240109	0.153218	0.580756	0.0600881	-0.0737931	0.144232	0.383028	0.411084	0.412229	0.522721	0.264375	0.48848	0.291443	0.299885	-0.327431	-0.217928	-0.0251731	-0.61224	-0.414606	-0.525357	-0.427221	-0.0791419	0.0355188	0.489581	-0.265727	0.292809	-0.174829	-0.194714	0.0965477	-0.439157	0.37796	0.36342	0.385329	-0.0432452	-0.481999	-0.251516	0.436234	-0.018992	0.0645938	0.224067	-0.184379	-0.465259	-0.219307	0.334056	-0.47996	-0.150276	-0.164816
TCGA.FD.A5C0	0.183712	0.0589348	0.0107108	-0.112741	-0.0578263	0.0455986	0.344398	0.123176	0.0932057	0.000169182	-0.102775	0.0156368	-0.126678	0.0767039	0.318866	0.17643	-0.199141	-0.059245	0.0347005	0.340264	0.388124	0.351864	0.147342	0.241056	0.037809	-0.0360334	-0.134819	-0.305451	-0.428207	0.221852	0.148919	-0.245702	-0.0568021	-0.0320264	-0.0239971	-0.0310247	0.032164	0.34449	0.104882	0.14181	0.272559	-0.133176	-0.0160514	0.135969	-0.464784	-0.172188	0.275891	0.0213157	0.294249
TCGA.FD.A5C1	-0.274488	0.0647027	0.0273049	0.268287	0.15418	-0.0347739	-0.180606	0.00547269	-0.0778404	0.239093	0.0371483	-0.024644	-0.21769	0.257101	0.19805	0.0126429	0.040487	0.102221	-0.00953725	0.205343	-0.104756	-0.0519343	0.137222	0.325509	0.363059	0.358627	-0.49396	-0.304987	-0.371114	0.256144	0.381494	0.489335	0.324672	0.217932	0.284956	0.0682151	-0.17132	0.37901	0.18031	0.0974652	0.528047	-0.152606	-0.284873	-0.0912289	-0.264804	0.295805	0.480175	0.0829941	0.331622
TCGA.FD.A62N	-0.160675	0.380921	-0.0921511	0.325628	0.241698	0.015755	-0.531355	-0.0336829	-0.01542	0.342768	0.117386	0.0129375	-0.109714	0.266858	0.610962	0.462476	0.0982807	0.270622	0.062312	-0.354355	-0.436696	-0.190478	0.0598033	0.362087	0.1016	0.490017	-0.576438	-0.144655	-0.120563	0.385509	0.455006	0.742203	0.301897	0.160634	0.300196	0.0933598	-0.353007	0.244933	-0.0136897	-0.0552216	0.453497	-0.272053	-0.358452	-0.237348	-0.270802	0.0471084	-0.0393433	0.177208	0.219623
TCGA.FD.A62O	0.273223	-0.31609	-0.137308	-0.40919	-0.199242	0.207196	0.272181	0.332857	0.138213	0.169874	0.194203	0.373304	-0.184835	-0.155678	-0.0704063	-0.414677	-0.299108	-0.0790199	0.120697	0.210042	0.184517	0.486171	-0.102571	-0.168487	-0.155743	-0.288918	-0.361359	-0.21185	-0.0182095	-0.120918	-0.424951	-0.586504	-0.131777	-0.0551261	-0.177341	0.106912	-0.0964175	0.181706	0.530611	0.279363	0.159082	0.341261	0.0858167	0.321577	-0.459881	0.330563	-0.242279	0.0509183	0.226924
TCGA.FD.A62P	0.213802	-0.300257	-0.288169	0.00444803	-0.0837597	0.0743374	0.154562	0.0661141	0.15639	0.236934	0.0373089	0.22943	-0.198304	0.0990666	0.281029	-0.0956476	-0.140386	-0.093215	0.00335014	0.215081	0.210794	0.20314	0.129532	0.197076	0.260249	0.273104	-0.645081	-0.150369	-0.223675	0.265125	0.271751	0.163664	-0.044342	-0.0450049	0.0745785	0.00922516	0.0931784	0.238069	-0.220741	0.19664	0.193223	-0.341264	-0.217148	0.198545	-0.353494	-0.0690396	0.449714	0.0332857	0.167537
TCGA.FD.A62S	-0.279442	-0.254448	0.243344	0.174952	0.327621	-0.214293	-0.175556	-0.084827	-0.0521424	0.101085	-0.0392748	-0.179997	-0.197388	0.238348	0.25028	0.188474	-0.493889	-0.285428	-0.163068	-0.400745	-0.281005	-0.104469	-0.2535	0.00737834	-0.294717	0.46132	-0.358551	0.141376	-0.390127	0.389868	0.339727	0.3898	0.384565	0.427904	0.400259	-0.264809	-0.563248	-0.115024	-0.125787	-0.277922	-0.0102584	-0.00722358	-0.471809	-0.39582	-0.356761	0.161339	-0.542593	0.0272272	0.11417
TCGA.FD.A6TA	-0.117249	0.021566	0.00860877	0.0464813	0.16497	0.0041168	-0.0770299	0.273644	0.462821	0.458712	0.557648	0.648336	-0.246991	0.174914	0.189626	-0.0801931	-0.412217	-0.123839	-0.111413	-0.223965	-0.124603	0.331248	-0.307911	0.0909735	0.33496	-0.336425	-0.31268	0.0655622	-0.382373	0.149766	0.295354	0.267807	0.135712	0.0788044	0.0988449	0.0412133	-0.23506	0.324274	0.378814	0.0475124	0.309959	0.141818	0.00316661	-0.147872	-0.561408	0.401532	0.128701	-0.140294	0.0285845
TCGA.FD.A6TB	0.239216	0.392606	-0.123409	0.339786	0.38773	0.0956795	0.0358956	0.261784	0.276048	-0.019818	-0.405926	0.159295	-0.0753424	0.0429808	0.424795	0.390117	-0.285859	-0.103511	-0.256894	0.0512476	-0.0204611	0.234185	0.301105	0.21659	-0.0154941	-0.134502	-0.190226	-0.112797	-0.210932	0.219053	0.363865	0.636453	0.0530436	0.0448682	-0.00203399	-0.00101433	-0.287441	-0.317776	-0.550692	-0.215822	0.116178	-0.519489	-0.0802458	-0.358703	-0.416412	-0.463874	0.0942865	-0.219068	0.0933617
TCGA.FD.A6TC	0.157934	-0.166301	-0.0391234	-0.114964	0.19241	-0.0884604	0.288214	0.100346	0.115098	0.0240175	0.156022	0.256332	-0.18327	0.144891	0.159189	0.0649328	-0.243266	-0.273596	-0.0170917	-0.242111	0.315659	-0.208197	0.0486159	0.221711	-0.00035691	-0.215565	-0.346499	-0.30962	-0.454079	0.133237	0.381423	-0.473464	-0.0772697	-0.126091	-0.110216	0.059961	-0.370185	0.358038	-0.0335684	0.1592	0.341783	-0.244783	-0.173276	-0.32466	-0.56826	0.0367354	-0.0690455	-0.0728312	0.196636
TCGA.FD.A6TD	0.0498223	0.355347	-0.101542	0.163227	0.193118	-0.164934	0.108547	0.00844115	-0.269421	0.112931	-0.330058	-0.387517	-0.331769	0.27382	0.336283	0.165211	-0.0922505	-0.0605748	0.0976553	0.226595	0.17017	-0.313867	0.163744	0.172577	0.0311048	0.181813	-0.563755	-0.318648	-0.45667	0.274561	0.490099	0.400082	-0.100801	-0.146774	-0.14891	0.011541	0.0341201	0.39815	0.123696	0.0711411	0.236131	-0.292119	-0.397642	0.380184	-0.454111	-0.008488	0.388872	0.107741	0.416869
TCGA.FD.A6TE	0.408685	0.237579	-0.345063	-0.0416072	-0.0168335	0.0643796	0.55779	0.218387	-0.103456	-0.232745	-0.216352	0.110969	-0.0964298	-0.16549	-0.163122	-0.216932	0.128022	0.162651	0.236881	0.159214	0.273933	0.550814	0.208916	0.0302877	-0.204404	-0.497805	0.335237	-0.175636	-0.141444	-0.248547	0.195968	-0.313259	-0.469818	-0.43553	-0.449223	0.320038	0.477455	0.458657	0.185277	0.360504	0.432883	-0.256927	0.199265	0.383042	-0.363707	0.0717964	0.354092	-0.0245826	0.292538
TCGA.FD.A6TF	0.0421079	-0.0502301	-0.220212	0.286128	0.0274978	-0.00640064	-0.0339599	0.275087	-0.00926904	0.0354173	-0.389684	-0.159708	-0.232492	0.131511	-0.223044	0.221657	-0.17572	0.0168694	0.0109115	0.283795	-0.151136	0.0716015	0.174105	0.109313	0.217631	0.341418	-0.231843	-0.21765	-0.299873	0.449868	-0.181126	-0.391306	0.274339	0.240926	0.295922	-0.0702255	0.147048	0.124566	-0.254593	-0.0462444	0.545543	-0.499721	-0.199301	0.272669	-0.520682	-0.131777	0.216677	0.180798	0.355764
TCGA.FD.A6TG	0.226704	0.362114	-0.223237	-0.0955686	0.124344	0.263969	0.040778	0.169484	0.226334	0.157015	0.10697	0.246284	0.0288582	0.0383148	0.497276	0.405722	-0.270801	-0.147218	-0.195366	0.149095	0.217246	0.127447	0.083548	0.296418	0.290595	-0.0821387	-0.297428	-0.169672	-0.193026	0.26622	0.164531	-0.134316	0.213375	0.23707	0.272487	-0.0116076	-0.0125601	0.27965	-0.22694	0.163976	0.235807	-0.464908	-0.0672204	0.135208	-0.559197	-0.225709	0.193229	-0.0965388	0.0408772
TCGA.FD.A6TH	0.266028	0.144432	0.0666918	-0.173868	0.138501	-0.132322	-0.336174	0.0505948	-0.0832491	-0.168808	-0.0764158	0.12611	-0.103551	0.354126	0.442314	0.0222229	0.415205	0.0127938	0.0885169	-0.0654754	-0.171707	0.0638469	-0.248981	-0.126385	0.231363	0.165729	-0.122098	-0.0981203	-0.0350887	0.389572	0.265519	-0.394512	0.12419	0.185424	0.133194	0.0841554	-0.129309	0.437984	0.115975	0.203433	0.415115	-0.447184	-0.199011	0.0552694	-0.471484	0.161336	-0.108455	0.0183195	0.206985
TCGA.FD.A6TI	0.293627	0.556482	0.00785966	0.39273	-0.00395464	-0.131582	0.517293	0.211884	0.35201	0.336359	0.185668	0.363177	0.196142	0.173364	0.373638	0.145095	-0.135041	0.163398	-0.0309782	0.171488	0.138842	-0.11479	0.0604164	0.472488	0.39984	-0.182435	0.210211	-0.209332	-0.132705	-0.0207313	0.0399953	-0.604355	-0.213015	-0.100019	-0.189478	0.345611	0.580385	0.367172	0.374823	0.150246	0.545281	0.242081	0.450112	0.486025	-0.122447	0.363608	0.638432	-0.0343894	0.0400213
TCGA.FD.A6TK	-0.229569	-0.437218	0.00632423	-0.281389	0.240149	-0.0911961	-0.367663	0.016818	-0.161013	-0.0393571	-0.288673	-0.0718795	-0.309678	0.250905	-0.0024274	0.0122641	-0.00786291	0.0735982	-0.205224	-0.00020698	-0.00857483	0.124607	0.0974468	-0.0880628	0.200787	0.276725	-0.439212	0.0150859	-0.323064	0.48024	0.443379	0.436465	0.442818	0.456332	0.437024	-0.056475	-0.385494	0.102329	-0.296136	-0.0581754	0.107412	-0.445628	-0.34066	0.105957	-0.32215	-0.131092	-0.154617	0.0716402	0.244475
TCGA.FJ.A3Z7	-0.101123	-0.19655	-0.260006	-0.102126	0.290695	0.00658888	-0.0390594	0.188902	-0.11773	-0.177422	-0.171099	-0.0405535	-0.280981	0.0654561	-0.417134	-0.43964	-0.165448	-0.0895243	-0.262453	0.0671542	-0.110749	-0.379397	0.316583	-0.393808	0.0207825	-0.414675	-0.321972	0.0307227	-0.152467	0.021697	-0.0931969	-0.370387	-0.146283	-0.243431	-0.207153	-0.402482	-0.534388	-0.333592	-0.447467	-0.310092	-0.0654245	-0.586123	-0.238417	0.21681	-0.342457	-0.149839	0.0306598	-0.192521	-0.104042
TCGA.FJ.A3Z9	-0.251282	-0.055289	-0.11312	-0.433961	-0.244358	0.15515	0.0225615	0.348133	0.367024	0.266764	0.5086	0.508515	-0.205359	0.0791961	-0.121529	-0.376382	-0.173414	-0.0531748	0.080196	-0.189181	-0.351484	0.0544053	-0.371523	-0.32534	0.317993	-0.387606	-0.469961	0.400612	-0.154272	0.127958	-0.258591	-0.532081	-0.171187	-0.0941538	-0.126199	0.144199	-0.298874	0.0792916	0.339792	0.289673	0.204085	0.0394154	-0.00651484	0.298527	-0.430033	0.421198	0.212057	-0.0714814	-0.0181679
TCGA.FJ.A3ZE	0.0754323	-0.51326	-0.0679631	-0.550466	-0.250461	-0.189973	0.235574	0.159272	-0.0836207	-0.0714012	0.192632	0.294362	-0.284508	-0.171627	-0.567035	-0.3661	0.103241	-0.242967	-0.303996	-0.306177	0.128965	-0.269388	-0.134163	-0.354998	0.0645718	-0.593054	-0.281941	0.407245	-0.476071	-0.306659	0.249643	-0.581435	-0.378519	-0.380082	-0.38484	-0.131064	-0.285526	-0.273711	0.00330879	0.102896	-0.135791	-0.389382	-0.139146	0.558229	-0.462905	0.0345961	0.13683	-0.227239	-0.0566148
TCGA.FJ.A3ZF	0.181645	-0.164202	-0.399279	-0.232	-0.37997	-0.0766775	0.33271	-0.0479133	-0.195093	-0.402343	-0.215517	-0.0104248	-0.158994	-0.157685	-0.406632	-0.562393	-0.0458031	-0.31299	-0.275221	0.114486	0.176353	0.370096	0.274538	-0.394187	-0.0808488	-0.534111	-0.504416	-0.111649	-0.239266	0.0528926	-0.18604	-0.53864	-0.387344	-0.416936	-0.39913	-0.23903	0.045431	-0.0265916	-0.0565322	-0.309036	-0.144131	-0.599156	0.0203708	-0.196578	-0.48547	-0.217699	0.15707	-0.127687	0.098607
TCGA.FJ.A871	-0.171927	-0.403323	-0.33898	0.117113	-0.186222	-0.163502	-0.369371	-0.0769112	-0.344471	-0.0686375	-0.14598	-0.158264	-0.328231	-0.434099	-0.255088	0.250139	-0.310896	-0.0836296	-0.00151819	0.425029	-0.0107517	0.19165	0.0945448	-0.255422	0.259073	-0.0135412	-0.636177	-0.0468634	-0.395998	0.0504291	0.207832	-0.371239	0.108738	0.0765766	0.154654	0.220996	-0.0509423	0.210116	-0.176983	0.25849	0.230102	-0.279639	-0.270424	-0.586183	-0.496888	-0.0974202	0.379422	0.297484	0.39384
TCGA.FT.A3EE	0.310413	-0.035667	0.15709	-0.0312963	0.0324978	-0.0874191	0.323159	0.285097	0.261921	-0.195713	-0.147369	0.0344791	-0.0166299	0.0556842	0.0698542	-0.192958	0.0732105	-0.0799474	-0.37144	0.528452	0.308147	0.406261	-0.0613872	-0.000675133	0.12291	-0.128594	-0.308991	-0.337871	0.00598625	0.150269	-0.302024	-0.560195	-0.0271641	0.146155	0.0489703	0.0118907	0.385106	0.379477	0.252736	0.204247	0.422094	-0.155289	-0.137564	-0.042017	-0.59227	0.265827	0.233999	0.219649	0.318274
TCGA.FT.A61P	0.0197371	0.0366558	0.00161846	0.15212	0.0150052	0.0898887	-0.383143	0.154996	-0.0366422	0.181445	0.0408358	0.064554	-0.112723	0.364246	0.165501	-0.162383	0.263811	0.118445	0.194229	0.121822	-0.11201	-0.112293	-0.0321085	0.0883049	-0.0238969	0.328025	0.331093	-0.0919984	-0.209516	0.449687	0.3718	0.193774	0.391064	0.339094	0.418594	0.313452	0.0530658	0.544043	0.0982496	0.403788	0.524793	-0.338668	-0.191964	0.114652	-0.207033	0.139487	-0.360263	0.146022	0.349663
TCGA.G2.A2EC	0.126468	0.386845	-0.00488113	0.0893143	-0.0490473	0.154919	0.457179	0.267539	0.158833	0.150433	0.00544955	0.228714	-0.0319426	-0.196553	0.484805	0.338143	-0.238857	0.0428744	-0.19997	-0.216933	-0.145694	0.167722	-0.0690235	0.280996	0.0270162	-0.0810922	-0.3957	0.0927678	-0.272038	-0.0773753	-0.267295	0.360463	0.0972042	0.222182	0.172143	-0.237911	-0.336351	-0.0123552	0.388224	-0.158248	0.0667722	0.188988	-0.0100833	-0.347433	-0.199268	0.470481	-0.0547984	-0.144893	-0.21072
TCGA.G2.A2EF	0.148672	-0.280874	-0.444446	-0.536847	0.0901126	-0.378859	-0.249958	-0.194811	-0.370277	-0.478106	-0.608373	-0.614878	-0.152265	-0.208916	-0.212397	-0.3576	-0.029066	-0.0638843	-0.10442	0.430116	0.411041	0.441482	0.386686	-0.091377	-0.237503	-0.466711	-0.388464	-0.0770866	-0.595599	0.247335	-0.0899496	0.311296	-0.119168	-0.0958366	-0.17752	-0.214235	-0.041932	0.219313	-0.452781	-0.203773	0.165799	-0.476967	-0.459397	-0.0140541	-0.664908	-0.415895	0.186833	-0.0147172	0.37463
TCGA.G2.A2EJ	-0.0394381	-0.119952	-0.0475814	-0.388972	0.0748359	-0.355046	0.0705235	-0.119063	0.0418437	-0.0703942	0.233877	0.125932	0.13127	0.3493	-0.345109	-0.393856	-0.140573	-0.184929	0.0797553	0.328515	0.368802	0.429061	-0.0965238	-0.224819	0.0299434	0.0041015	0.0222909	-0.276847	-0.0869763	0.406001	0.266616	-0.0159624	-0.119627	0.0189802	-0.178147	0.0137205	-0.19498	-0.0502553	-0.232482	0.0257699	0.249214	-0.453743	-0.430531	-0.0206038	-0.470428	0.0823535	0.0790702	0.0897043	0.352823
TCGA.G2.A2EK	0.395616	0.492699	-0.172569	0.309537	0.0578697	0.0929102	0.44135	0.291797	0.13326	0.214139	0.236948	0.32624	0.074938	0.221679	0.5511	-0.0406861	-0.302891	-0.372823	-0.362011	0.0681813	0.202855	-0.0157077	0.172118	0.188562	0.183554	-0.418899	-0.158242	0.150346	-0.13312	-0.199156	-0.542858	0.0877446	-0.226912	-0.27911	-0.203696	0.0251395	-0.0382443	-0.0312331	0.144221	0.0618961	-0.0620554	-0.141202	0.205789	0.23613	-0.303946	0.0893811	0.210535	-0.0590388	-0.16071
TCGA.G2.A2EL	-0.145247	-0.532683	-0.48025	-0.591518	-0.24914	-0.131899	-0.0194681	-0.280551	-0.488309	-0.540601	-0.450231	-0.289918	-0.403429	-0.168486	-0.516431	-0.606791	0.0589842	-0.418107	0.0411371	0.59878	0.596894	0.658912	0.123507	-0.428563	-0.0805426	-0.486625	-0.431198	0.021495	-0.3791	-0.14513	-0.394596	-0.463283	-0.417987	-0.367487	-0.423398	0.0279481	0.125091	0.195089	-0.228844	0.0823895	-0.1423	-0.417711	-0.272781	0.223398	-0.412747	-0.419619	0.308081	0.0800827	0.332056
TCGA.G2.A2EO	-0.0812032	0.221759	-0.196726	0.124031	-0.158027	-0.230654	0.0222647	-0.0773	0.0562435	0.258779	0.22403	0.439286	-0.231823	-0.0804276	0.232276	-0.15826	-0.15456	-0.124333	0.345822	0.389991	0.117114	-0.0632858	-0.0023584	-0.0404898	0.392929	-0.253957	-0.409261	-0.299722	-0.0575808	0.199883	0.550308	0.305986	-0.240849	-0.255269	-0.239444	0.270434	0.291901	0.415091	0.55507	0.203143	0.358802	0.00760264	0.0765646	0.389848	0.0236304	0.28813	0.623718	0.188615	0.254518
TCGA.G2.A2ES	-0.127414	-0.704101	0.0609767	-0.457688	-0.0302198	-0.147113	-0.0171914	-0.166701	-0.0549626	-0.0667543	0.0612508	0.0596505	-0.216081	0.0686594	-0.212174	-0.553364	-0.409887	0.275336	0.0946843	0.59191	0.268292	0.423086	-0.179995	-0.301203	0.289221	-0.212572	-0.103099	-0.356987	0.14789	0.290677	0.316721	0.110718	-0.0993476	-0.0211783	-0.143457	0.250082	0.401197	0.249228	-0.281209	0.240627	0.139964	-0.261153	-0.0725224	0.48605	-0.639682	0.255312	0.523471	0.179346	0.405436
TCGA.G2.A3IB	-0.454923	-0.494412	0.22958	-0.305862	0.0729557	-0.0394302	-0.413855	0.146536	0.171941	0.254567	0.370954	0.42473	-0.249781	0.47002	-0.316959	-0.411729	-0.378676	0.0912186	-0.0101445	-0.0027122	0.0464894	-0.228024	-0.237293	-0.371804	0.0440043	-0.26867	-0.109722	0.256876	0.137064	0.272705	0.262504	-0.207863	0.0141357	0.064729	0.0821359	0.254943	-0.111511	0.357749	0.402943	0.239226	0.105572	0.249638	-0.291052	0.622604	-0.335614	0.498148	-0.270784	0.0118542	0.169454
TCGA.G2.A3IE	0.217491	0.0655365	0.0687018	-0.0749951	0.306695	0.0455831	0.229782	0.251629	0.056104	0.17337	0.385078	0.314304	-0.0759537	0.288487	0.325626	0.157006	-0.173712	-0.0645422	-0.0320093	-0.334126	-0.0928848	-0.281015	-0.0904974	-0.193875	0.164019	-0.454535	-0.47446	0.338875	-0.137963	0.0622957	-0.412326	-0.248911	-0.349792	-0.363294	-0.299108	-0.141226	-0.42747	0.0808369	0.349863	0.0768296	0.0599885	-0.0763221	-0.0540454	-0.44337	-0.312755	0.354895	0.106566	-0.193204	-0.0349514
TCGA.G2.A3VY	0.471955	0.44766	-0.112264	-0.133954	0.178759	0.076653	0.475476	0.229517	0.0567896	-0.310242	-0.0811854	0.172955	-0.0767306	-0.13087	0.378592	0.0806202	-0.0439784	-0.304369	-0.313193	0.206351	0.34302	0.319017	0.403133	0.124448	-0.163542	-0.562934	-0.251637	0.0637634	-0.409976	0.100553	-0.203251	-0.527867	-0.403287	-0.375278	-0.380143	-0.122769	0.112356	0.354207	-0.0999338	-0.00657742	0.177416	-0.464582	0.14191	0.141802	-0.506735	-0.280651	-0.0126824	-0.130724	0.0740563
TCGA.G2.AA3B	0.175759	-0.289693	-0.291178	-0.566555	-0.347007	0.091873	0.295677	0.177781	-0.119017	0.114904	0.324878	0.358351	-0.325699	-0.0149914	-0.298186	-0.585259	0.155988	-0.0862268	-0.146094	0.263263	-0.142882	0.411368	0.162191	-0.371593	0.233539	-0.438886	-0.605379	-0.0987532	-0.0647302	0.0130171	0.212609	-0.152091	-0.390054	-0.455528	-0.375033	0.0566712	0.321069	0.289056	0.33086	0.255812	-0.260858	0.209894	0.326806	0.275363	-0.215622	0.381013	0.484952	-0.0309139	0.202073
TCGA.G2.AA3C	-0.0680034	0.142526	-0.221436	0.345664	-0.0951157	0.241168	-0.413149	0.0920232	-0.171213	0.251861	0.153555	0.00360663	-0.247879	-0.153111	0.437117	0.393175	0.0346132	0.101838	0.269954	-0.0323912	-0.320054	-0.124305	0.154019	0.142997	0.36454	0.343527	-0.728773	0.00436867	-0.407102	0.388985	0.367279	0.156496	0.0861754	-0.123946	0.120506	0.356725	-0.0413729	0.485878	0.341225	0.398788	0.231431	0.155664	0.116884	0.407297	-0.281012	0.233312	0.486019	0.286159	0.405736
TCGA.G2.AA3D	0.371036	0.329436	-0.0615816	-0.313162	0.0877546	0.0306603	0.337138	0.201687	0.100938	-0.0454998	0.153255	0.365533	-0.198425	0.0316847	0.138095	-0.150211	-0.314465	-0.167486	-0.110594	0.426593	0.087111	0.48287	0.172616	-0.0448432	-0.0503921	-0.457255	-0.538839	-0.00702915	-0.468531	0.0401677	-0.284984	-0.449844	-0.437959	-0.427266	-0.417479	-0.00435671	0.155607	0.262157	-0.137505	0.137858	0.351267	-0.220628	0.103834	0.474646	-0.569085	-0.0366697	0.360505	-0.0941384	0.242554
TCGA.G2.AA3F	0.454178	0.358589	-0.220632	-0.260539	-0.149075	0.0616019	0.461344	0.0824748	0.0285928	-0.22174	-0.0431663	0.107277	0.0252388	-0.145436	0.241021	-0.0598707	-0.0316072	-0.374312	-0.0558733	0.48897	0.33425	0.429994	0.138676	-0.121794	-0.0339899	-0.413088	-0.274228	-0.273906	-0.166153	-0.0220292	-0.420925	-0.63067	-0.430142	-0.39478	-0.416718	-0.0072046	0.248405	0.219862	0.210243	0.249099	0.212988	0.0452743	0.150214	0.132983	-0.464517	0.079225	0.240915	-0.151264	0.130782
TCGA.GC.A3BM	0.289836	0.223249	-0.114275	-0.432843	0.00740893	-0.225613	0.427431	0.157597	-0.0163442	-0.156198	-0.0974833	0.0950492	-0.294977	-0.251907	-0.171843	-0.353002	-0.354461	-0.354296	-0.0459431	0.53808	0.452223	0.32944	-0.0637575	-0.154724	-0.243771	-0.370796	0.0372607	0.0699304	-0.417468	-0.145718	-0.395012	-0.298291	-0.378862	-0.399368	-0.404177	-0.198062	-0.0284506	0.0847199	0.166654	-0.135418	0.0347507	-0.0840925	-0.293039	-0.106867	-0.408576	0.0190828	-0.111641	-0.027456	0.23326
TCGA.GC.A3I6	0.210983	-0.332897	-0.150467	-0.372337	-0.18033	-0.164089	0.280243	-0.156225	-0.0263661	-0.0827036	-0.269471	-0.161517	-0.119223	-0.162351	0.207322	-0.243991	-0.261417	-0.18245	-0.0112245	0.363518	0.449024	0.651368	0.141591	0.0420392	-0.187492	-0.421255	0.269335	-0.410722	-0.181806	0.0896713	0.259519	0.212742	-0.302266	-0.2307	-0.322192	0.00488113	0.126808	0.134213	-0.234993	0.113593	0.165154	-0.217519	-0.356885	-0.0207624	-0.500446	-0.0707874	0.152556	-0.0804778	0.287415
TCGA.GC.A3OO	0.51593	-0.120441	0.0363662	-0.19475	0.441277	-0.0866737	0.363337	0.236833	0.0847959	0.0856572	0.0011457	0.124275	-0.0749546	-0.131095	0.334221	0.383091	0.113322	0.122067	0.0249047	0.204867	0.302449	0.384663	0.285852	0.206694	0.196197	-0.0249996	0.323712	-0.180678	-0.170655	0.368063	-0.423953	-0.447733	0.259312	0.281093	0.201755	-0.0454823	0.380669	0.427429	-0.116129	0.269989	-0.0281309	-0.126026	-0.0498246	0.259744	-0.289801	-0.0420082	0.174692	0.0506864	0.288944
TCGA.GC.A3RB	0.417289	-0.363315	-0.18887	-0.500103	0.318844	0.0501498	0.116795	0.17896	0.130545	-0.30575	-0.213339	-0.0740072	-0.240213	0.21995	0.369042	-0.08367	-0.0870585	-0.33918	-0.0501997	0.61497	0.522146	0.354948	-0.101202	-0.158839	-0.186088	-0.306503	-0.171705	-0.23494	-0.316439	0.342969	0.149252	-0.496699	-0.354781	-0.30644	-0.332401	0.136054	0.387656	0.335947	0.181518	0.206602	0.347904	0.0042324	0.0754557	0.171861	-0.515153	0.0241239	0.0471444	0.138705	0.338268
TCGA.GC.A3RC	-0.0884072	-0.238354	0.0907562	-0.0290069	-0.346028	-0.191129	-0.275417	-0.096733	0.0117937	0.0435047	0.263434	-0.00619528	0.000137373	0.233207	-0.234963	-0.0253628	0.117	-0.142181	-0.0298481	-0.164939	-0.013336	0.490163	-0.218015	-0.0422668	-0.260846	0.187204	-0.448786	-0.0588972	-0.331221	0.205491	0.257075	0.387679	-0.0335694	0.192855	0.0440857	0.000741672	-0.314878	0.0253473	-0.0617633	0.117798	0.308397	-0.24964	-0.573934	0.268577	-0.307244	0.228347	-0.540078	-0.0114181	0.0974363
TCGA.GC.A3RD	0.343657	0.521462	-0.068738	-0.00904418	0.231202	0.0509097	0.548289	0.322221	0.296153	0.0535524	0.304785	0.445897	0.0733785	0.0664623	0.127475	-0.129623	-0.156127	-0.243683	-0.0370091	0.17124	0.246364	0.192173	-0.0953018	0.0719497	0.08353	-0.293325	-0.29534	0.0802979	-0.273692	-0.143824	-0.0137059	-0.456569	-0.351004	-0.350721	-0.337128	0.0517908	-0.00848168	0.346203	0.33708	0.126192	0.48324	-0.0237544	0.00442108	0.212188	-0.595981	0.302665	0.128108	-0.122098	0.112647
TCGA.GC.A3WC	0.0650093	-0.353861	-0.272582	-0.0274771	-0.00763783	-0.0252061	0.277439	0.0112844	0.176427	0.167153	0.229432	0.0656497	-0.415072	-0.195035	-0.374644	-0.0301023	-0.0130379	0.133509	-0.13202	0.486083	0.210881	0.34238	-0.239012	-0.307993	0.10087	0.0788518	-0.239167	0.173023	-0.197125	-0.127391	0.326048	0.616557	-0.177942	-0.279412	-0.170011	-0.102456	0.163964	0.0179799	-0.0575958	-0.154263	-0.187016	0.222862	-0.250454	-0.0676377	-0.430631	0.143913	0.0126314	-0.16935	0.10357
TCGA.GC.A3YS	0.0876789	0.107985	-0.246997	-0.0916436	0.205726	-0.106784	0.386466	-0.0503158	-0.2257	-0.2335	-0.268031	-0.405879	-0.128073	-0.204149	0.152301	0.165624	-0.186041	0.0634952	-0.100752	0.14293	0.300432	-0.393509	0.294436	0.105587	-0.170264	-0.398578	-0.536606	-0.329774	-0.604187	0.074695	0.224717	-0.194274	0.0039649	0.0648935	-0.0529528	-0.248976	-0.333528	0.0452947	-0.273639	-0.230824	-0.0858297	-0.26854	-0.48337	0.00229415	-0.407053	-0.147275	0.000186782	0.00299162	0.30204
TCGA.GC.A4ZW	0.35033	0.185319	-0.358112	-0.121424	-0.127756	0.0543569	0.281862	0.144048	0.049372	-0.252467	-0.188342	-0.0952705	0.100523	0.306114	-0.0900962	-0.349404	0.137202	-0.144499	0.073597	0.376465	0.291857	0.276111	0.126128	0.0621787	-0.119459	-0.2778	-0.0607871	-0.173124	-0.0469834	0.132324	-0.469664	-0.36915	-0.357947	-0.385502	-0.384317	-0.049609	0.363796	0.421159	0.00751415	0.240738	-0.0223576	-0.305011	-0.169378	0.246872	-0.190126	-0.223017	0.261455	0.0212676	0.373233
TCGA.GD.A2C5	0.418379	0.527112	-0.296015	-0.0140252	-0.389319	-0.153011	0.557414	0.181173	0.0946802	0.0326413	-0.0228785	0.400641	-0.117409	-0.192463	0.0273769	0.0778255	-0.229133	-0.285092	-0.142811	0.582385	0.418206	0.44231	0.267766	0.197689	0.0196254	-0.332971	-0.428997	-0.271168	-0.324109	-0.00929885	-0.14166	-0.516545	-0.303939	-0.311755	-0.282587	-0.139615	0.177928	0.210412	0.0532285	0.0346167	0.108644	-0.192392	-0.0992455	0.387222	-0.529787	-0.0937695	0.320836	-0.0189709	0.246904
TCGA.GD.A3OP	0.30085	0.459023	-0.0729266	0.0423403	0.114861	0.0766037	0.540772	0.330422	0.373923	-0.00498895	-0.0497734	0.243501	0.0845265	0.0163698	0.265309	-0.0497365	-0.282737	-0.159728	-0.0752015	-0.0883958	0.148721	0.307353	0.204453	0.189975	-0.238095	-0.217908	0.141733	-0.19064	-0.358569	-0.131602	-0.502563	-0.324386	-0.235297	-0.262995	-0.222921	-0.264563	0.0590767	-0.0548527	0.128962	-0.264288	-0.02215	-0.0766518	0.212817	-0.130996	-0.273484	0.0115724	-0.143588	-0.116958	0.0292112
TCGA.GD.A3OQ	0.259141	-0.0718191	0.318541	-0.289625	0.213277	0.0532039	0.156209	0.150001	0.0657761	-0.172145	-0.129208	0.0581921	-0.0730694	0.49382	0.332168	-0.193446	-0.213007	-0.179682	0.0637525	0.291761	0.30718	0.561437	0.107638	-0.0322988	-0.100302	-0.229187	0.0349253	-0.162037	-0.364569	0.413268	-0.436647	-0.511717	-0.0577069	0.111738	-0.0840449	0.194459	0.228831	0.213899	0.134452	0.226588	0.30613	0.00386029	-0.0702212	0.0172117	-0.583242	0.255392	0.127125	-0.100996	0.331226
TCGA.GD.A3OS	-0.168355	-0.111094	-0.234372	0.33069	0.107729	-0.25589	-0.185278	-0.240931	-0.364563	-0.315078	-0.441916	-0.363872	-0.409704	-0.433227	-0.196627	-0.0308779	-0.500683	-0.25996	-0.338462	0.0634634	0.302209	0.292664	0.189234	-0.266768	-0.0463371	-0.360439	-0.426062	-0.196456	-0.414035	-0.124734	-0.211488	-0.290981	0.0348028	-0.112928	0.00212613	-0.176282	-0.503767	-0.0747768	-0.399833	-0.0366032	0.432319	-0.446029	-0.424002	-0.412962	0.0688448	-0.457071	-0.471069	0.0399423	0.00648391
TCGA.GD.A6C6	-0.0552906	0.405847	-0.263515	0.0277477	0.0568845	0.1144	0.156512	0.232298	-0.0468301	0.35546	0.291531	0.235061	-0.0348987	0.185818	0.0595968	-0.0478729	-0.120604	-0.0298672	0.277199	-0.20427	-0.445831	-0.0915443	-0.133636	0.0506933	0.299551	0.0304802	-0.540781	0.0357383	-0.17819	0.0992162	0.336014	-0.131441	-0.205272	-0.268496	-0.199326	-0.101772	-0.436176	0.166872	0.400448	0.216162	0.109538	0.00595404	-0.0411917	-0.240258	-0.116149	0.417559	0.462733	0.160547	0.264504
TCGA.GD.A76B	0.189887	0.207232	-0.0563082	-0.122233	0.428469	0.0440046	0.324342	0.179759	0.231805	0.252192	0.299169	0.499278	-0.211334	0.0107172	0.0796616	0.0449225	-0.30587	-0.314406	-0.0890519	0.172128	-0.0929863	0.0281168	0.0735144	-0.233522	0.308832	-0.406434	-0.40011	0.0648418	-0.204974	0.0218992	0.214736	0.490068	-0.323017	-0.356471	-0.270445	0.031694	-0.22678	0.0802048	-0.0537522	0.119137	0.0595306	-0.428711	0.363772	0.207377	-0.489044	0.0225695	0.430941	-0.115526	-0.00652739
TCGA.GU.A42P	0.258833	0.153464	-0.440166	0.0884188	-0.253145	-0.0291621	0.369689	-0.0190727	-0.0854009	-0.105686	-0.0689047	0.152166	-0.124247	0.050878	-0.240794	-0.427432	-0.0679578	-0.220796	-0.0605819	-0.193643	0.31425	0.212016	-0.29584	-0.152961	-0.165295	-0.411799	0.0545693	0.287424	-0.119213	-0.0559994	0.0825517	-0.596773	-0.344022	-0.339227	-0.330921	-0.034263	0.0207681	0.175772	0.251214	0.0583166	-0.0617512	-0.0634551	0.123073	0.363315	-0.436417	0.223335	-0.0862029	-0.0819042	0.156795
TCGA.GU.A42Q	-0.236431	-0.669642	-0.0970206	-0.272628	0.338268	0.0327834	-0.00754652	0.0557899	-0.15913	-0.00700908	0.0506086	-0.0664978	-0.368359	0.131051	-0.238942	-0.135022	-0.419069	-0.165482	-0.0430644	0.290806	0.267232	0.341357	-0.294821	-0.457796	0.151836	-0.0305409	-0.0992362	-0.108412	0.191283	-0.0162022	0.0197176	-0.469602	0.0261034	0.176098	-0.0156414	0.300892	0.239029	0.434347	0.22397	0.383699	0.238466	0.212901	-0.278751	-0.286665	-0.499891	0.227019	0.0279311	0.0846121	0.292936
TCGA.GU.A42R	0.175177	0.221676	-0.0382335	-0.387454	-0.00423463	-0.326166	0.459179	-0.025638	0.131083	-0.158981	0.131131	0.14704	-0.224042	-0.13034	0.0318182	-0.0661619	-0.478058	-0.247439	-0.221876	0.12979	0.322552	0.292126	-0.0139779	-0.127257	-0.216291	-0.436572	-0.452332	0.105422	-0.498115	-0.0506882	-0.123142	-0.634551	-0.351448	-0.340772	-0.404762	-0.226879	-0.437448	-0.153254	0.0677223	-0.276615	0.143573	-0.0588577	-0.307928	-0.22887	-0.492654	0.00171199	0.0842217	-0.26468	0.0113311
TCGA.GU.A762	0.148828	0.185211	-0.116578	0.0782928	0.318145	-0.0815009	-0.204274	0.0552054	-0.256776	-0.0459341	-0.202914	-0.436249	-0.198669	0.139076	0.158069	0.20441	0.00266239	0.140755	0.080961	0.167515	-0.198092	-0.197081	-0.0675513	0.167674	0.138262	0.0957228	-0.458637	-0.179344	-0.380054	0.292796	0.63241	0.586545	0.0768591	0.00967162	0.0380912	-0.0506592	-0.176242	0.155984	-0.0880849	-0.150948	0.283872	-0.301206	-0.322052	-0.0672743	-0.557771	0.000433315	0.278811	0.192941	0.411289
TCGA.GU.A763	-0.0091887	0.356794	-0.36349	0.170848	-0.0261209	0.164895	0.14852	0.222922	0.175277	0.351506	0.521891	0.449686	-0.340054	0.0809156	-0.000805214	-0.0649016	-0.216117	0.0394554	-0.0870354	0.075439	-0.37553	0.149159	-0.271708	-0.0649904	0.451391	-0.289692	-0.453087	0.0242087	0.150652	-0.174314	-0.076371	-0.15299	-0.24871	-0.340045	-0.179093	0.292564	0.169282	0.250491	0.414386	0.161881	0.261001	0.3826	0.198035	0.0277688	-0.00966198	0.473239	0.614402	0.271143	0.340007
TCGA.GU.A764	0.0665203	0.0753271	-0.146787	0.178466	0.261868	-0.0790419	0.204534	0.0535679	-0.254023	-0.088119	-0.299874	-0.237068	-0.308452	0.312817	0.109444	-0.232799	0.115658	-0.117273	-0.169168	-0.110743	0.0206733	-0.0631613	0.249453	0.112043	0.244023	-0.0444534	-0.128174	-0.299514	-0.300939	0.381804	0.386986	0.400762	0.181209	0.260626	0.203124	-0.129101	-0.272863	0.100351	-0.0672767	-0.161882	0.172741	-0.28515	-0.39292	-0.353701	-0.669719	-0.11334	0.326383	0.108519	0.381429
TCGA.GU.A766	-0.148442	-0.0243084	-0.268652	0.0423219	-0.0836395	-0.262613	-0.397341	-0.233305	-0.227908	0.0509	-0.26182	-0.33374	-0.298637	0.0230799	0.25206	-0.0377311	-0.0750128	0.0573877	0.05001	0.226339	0.207859	0.0868276	0.128303	0.0989921	0.252666	0.22131	-0.629543	-0.267428	-0.400531	0.341549	0.45094	0.630545	0.130091	-0.035757	0.0816498	0.0325173	-0.188189	-0.050391	-0.381375	-0.292009	0.164747	-0.247225	-0.353207	-0.398244	-0.43049	-0.237458	0.434511	0.137306	0.332674
TCGA.GU.A767	-0.0865312	-0.239359	-0.398522	-0.277596	0.0783953	0.0890194	0.136936	0.26081	0.13313	0.39233	0.28721	0.490923	-0.272079	0.127472	0.199717	-0.124785	-0.320681	0.0638492	0.0442275	0.0260476	-0.14781	-0.221617	-0.229782	-0.198869	0.455592	-0.0627876	-0.364304	-0.0260074	-0.0625463	-0.0794688	-0.20042	-0.453241	-0.00791185	-0.122975	-0.00272969	0.0604724	-0.0871985	0.0440327	0.126284	-0.0047941	0.0594554	0.0265156	0.18912	0.1624	-0.29644	0.198417	0.493584	0.0218666	0.257631
TCGA.GU.AATO	0.235651	0.482414	-0.124092	0.0989682	-0.0547566	0.100473	0.465184	0.232533	-0.034386	0.306467	0.260752	0.261748	0.250174	0.242659	0.301001	-0.0628615	0.179327	0.20096	0.358526	-0.407907	-0.165764	-0.353683	0.129207	0.323761	0.291137	0.0814111	-0.312591	-0.109657	-0.124164	0.0389744	0.206982	0.270068	-0.026784	-0.148484	-0.0151333	0.226849	0.0655588	0.51923	0.357155	0.44681	0.374215	-0.377737	0.0593096	0.50458	-0.341985	0.289093	0.443971	0.0447815	0.326584
TCGA.GU.AATP	-0.213167	0.316064	-0.152121	0.271602	0.043467	0.00601641	-0.313376	0.214988	-0.0907922	0.137547	0.314933	0.292903	-0.159709	0.318268	0.536337	-0.122077	-0.32355	-0.094679	-0.272113	-0.448053	-0.215221	-0.358571	-0.169296	0.0559621	0.222704	-0.270177	-0.420642	0.214734	-0.153228	0.164789	0.393901	-0.0497577	-0.0319678	-0.103259	0.0570523	-0.185253	-0.546699	-0.263019	0.237207	-0.203991	-0.078667	-0.0624303	-0.391041	0.289699	-0.372183	0.232617	0.076284	-0.190421	-0.115554
TCGA.GU.AATQ	-0.0483476	-0.235475	-0.203318	-0.481509	0.187319	0.0769991	0.361749	0.169459	-0.134373	0.108886	0.180241	0.211461	-0.226306	-0.0436611	-0.335234	-0.190494	-0.0981255	-0.221521	0.101219	0.40565	0.224655	0.412663	-0.102856	-0.310629	0.210308	-0.406847	-0.258352	-0.194881	-0.296046	-0.0642724	0.063387	-0.375723	-0.23357	-0.24475	-0.231121	0.35142	0.243245	0.481852	0.322017	0.254459	0.291757	0.374791	0.0759696	0.553039	-0.566954	0.28688	0.337418	0.0991766	0.364808
TCGA.GV.A3JV	0.147669	-0.298703	-0.199193	-0.397119	-0.0508225	-0.0163273	-0.0635363	0.201415	0.101624	0.105912	0.28728	0.196158	-0.123307	-0.109555	0.039969	-0.458355	0.0590049	-0.238199	-0.114547	-0.17123	0.000258316	0.0442281	-0.000391917	-0.18842	0.30949	-0.173162	-0.155635	-0.00068763	0.216134	-0.093659	0.0228148	0.262478	-0.0796037	-0.0818749	-0.0421194	-0.291867	-0.202307	-0.429795	0.0895705	0.1613	-0.151239	-0.0262913	-0.15285	-0.174044	-0.332174	0.193822	0.291549	-0.0259768	0.0307448
TCGA.GV.A3JW	0.355813	0.101119	-0.390527	-0.452003	-0.0706206	0.155566	0.470856	0.168927	0.0169072	-0.116463	0.0928048	0.277075	-0.142888	-0.0753818	-0.340815	-0.318122	-0.337646	-0.153222	-0.26323	0.424836	0.271517	0.476526	-0.0446194	-0.159082	-0.14473	-0.320211	-0.573656	-0.00734213	-0.1078	0.074067	0.0453601	-0.575372	-0.412808	-0.372594	-0.407873	-0.00310973	0.20009	0.144063	-0.121952	-0.0694321	0.154575	-0.0437765	0.145354	0.469032	-0.37327	-0.0975013	0.0904875	-0.159972	0.101045
TCGA.GV.A3JX	0.478941	0.546196	0.0188877	-0.0555797	0.078299	0.00726386	0.462159	0.229561	-0.174791	-0.323441	-0.346572	-0.319544	0.332397	0.31908	0.422026	0.00602791	0.350632	-0.0826632	0.0687504	0.231437	0.185584	0.117565	0.380679	0.256654	-0.303239	-0.369614	0.302258	0.0699894	-0.104315	0.364245	-0.176887	-0.0598852	-0.361161	-0.361141	-0.388184	-0.16355	0.339972	0.171068	-0.0884642	0.0377032	0.161784	-0.451301	-0.161723	0.270787	-0.535135	-0.173219	-0.0121063	0.057494	0.352159
TCGA.GV.A3JZ	0.408272	-0.0133541	-0.321516	-0.234134	0.0171019	-0.0796738	0.41123	0.00187708	-0.112842	-0.325155	-0.320632	0.0986831	-0.0173726	-0.233574	0.272509	-0.202574	0.107079	-0.364659	-0.335128	0.289301	0.366787	0.523095	0.268237	0.00888349	-0.0622569	-0.508648	-0.123531	-0.320658	-0.202388	0.172941	0.297257	-0.504192	-0.340144	-0.217429	-0.328576	-0.263202	0.168139	0.0133434	-0.0814315	-0.0663378	-0.0909029	-0.429996	-0.256743	0.192542	-0.547176	-0.295236	0.329374	-0.0420458	0.159456
TCGA.GV.A3QF	0.420299	0.0299496	-0.162918	-0.345429	0.0264748	-0.0280015	0.378971	0.209903	0.0917632	0.0376295	0.410288	0.292279	-0.0964527	0.0667142	-0.293291	-0.342074	0.0483758	-0.181614	-0.22831	0.0179564	0.188783	0.459816	-0.1324	-0.133518	0.0763776	-0.401162	-0.1337	0.147736	0.0415976	0.161389	-0.294269	-0.581053	-0.269443	-0.233	-0.249149	0.136758	0.250113	0.415839	0.531717	0.391535	0.264243	0.0978444	0.145499	0.603156	-0.35057	0.390293	0.381651	-0.0880976	0.119098
TCGA.GV.A3QH	0.51678	0.186303	-0.152662	-0.310329	0.0210393	0.0402701	0.374834	0.203633	-0.112985	-0.253676	-0.156829	0.0768432	-0.109959	-0.0715254	0.0833925	-0.177244	-0.177036	-0.24041	-0.125818	0.247968	0.319375	0.356552	-0.0480566	0.00605283	-0.18931	-0.485158	-0.191489	0.0923638	-0.162322	0.0270593	-0.101221	-0.497784	-0.444504	-0.44373	-0.406683	-0.0722884	-0.0103102	0.0834021	0.371645	0.106818	0.117169	-0.0856135	-0.0491839	0.0323806	-0.598756	-0.0693585	-0.135752	-0.123089	0.0999704
TCGA.GV.A3QI	0.51924	0.352999	-0.132191	0.0913358	0.198738	0.0952174	0.642046	-0.115946	-0.374504	-0.416583	-0.242397	-0.38209	0.225889	-0.361058	-0.125937	0.289473	0.366948	-0.188553	-0.27755	0.38161	0.444857	0.450911	0.166977	0.114047	-0.188395	-0.370645	-0.165491	-0.356577	0.0550458	-0.17719	-0.495177	-0.548563	-0.353087	-0.276419	-0.33022	-0.0911416	0.44397	0.191825	0.303423	-0.0849056	-0.0477781	0.0573918	0.152425	0.303796	-0.431214	-0.135526	0.235969	0.165378	0.400913
TCGA.GV.A3QK	0.130422	0.212605	-0.237759	-0.257857	-0.0120424	0.00777282	0.336088	0.295558	0.185367	-0.0165075	0.161429	0.314287	-0.113232	-0.133054	-0.0700592	-0.273692	-0.0656833	-0.156712	-0.266883	0.0896407	0.157095	0.318447	0.079449	0.00786664	0.117957	-0.409368	-0.113238	0.271457	-0.198721	-0.125137	-0.380193	0.18165	-0.418548	-0.433635	-0.428944	-0.0630915	0.186489	-0.0561597	-0.135358	0.0822697	0.193997	-0.317585	0.0613729	0.0534335	-0.475409	0.0113316	0.433315	-0.126958	0.180974
TCGA.GV.A40E	0.193242	0.0813874	0.0303597	-0.192547	0.0844948	0.0402462	0.236427	0.0559685	-0.195408	-0.0532339	-0.242686	-0.170947	-0.231741	0.209489	0.269606	-0.167078	0.00368622	0.105062	-0.22518	0.231554	0.192882	0.0565403	0.174696	0.0193876	-0.0901619	-0.324807	-0.376588	-0.225084	-0.379596	0.277958	0.111012	-0.259006	0.00262052	-0.0342782	-0.0683424	-0.00507492	-0.147254	0.264657	0.272601	0.111894	0.445129	-0.171935	-0.381945	-0.255732	-0.609754	0.0172167	0.209693	0.132193	0.439251
TCGA.GV.A40G	0.112483	0.202098	-0.464198	-0.30108	-0.015313	0.0724226	0.502654	0.20085	-0.120791	-0.163634	0.134891	0.106585	-0.168981	0.138554	-0.237379	-0.464979	0.0570612	-0.167258	-0.160107	0.296834	0.110329	-0.298935	0.175844	-0.0556762	0.128391	-0.359277	0.17787	-0.107035	-0.305755	-0.155142	-0.37506	-0.429996	-0.340797	-0.424228	-0.378178	-0.235699	0.325883	0.240251	0.167471	0.0766552	-0.104636	-0.394785	-0.0406692	0.479004	-0.297499	0.104977	0.396446	0.00997904	0.273723
TCGA.GV.A6ZA	0.175383	-0.173935	-0.416569	-0.291734	0.358919	-0.0129976	0.47017	0.150284	-0.118872	-0.146741	0.00780627	0.291822	-0.305071	0.0331538	-0.0797019	-0.376411	0.00250985	-0.192483	-0.142868	0.412765	0.141305	0.409582	-0.0814081	-0.259693	0.175656	-0.408998	-0.335081	-0.141704	-0.23774	0.115308	0.0840345	-0.124858	-0.40853	-0.433807	-0.395151	0.124607	0.169169	0.301764	0.287833	0.231348	0.140613	0.127321	0.0962524	0.210257	-0.520543	0.0850847	0.49701	-0.00648841	0.339487
TCGA.H4.A2HO	0.02935	0.187193	0.227443	-0.0733073	0.173029	0.13744	0.0802386	0.288303	0.339674	0.285416	0.474141	0.46272	-0.0875402	0.271632	-0.134154	-0.222604	0.198427	-0.0806656	0.0303375	-0.275828	-0.170184	0.152898	-0.177072	-0.072139	0.278611	-0.119378	-0.22694	-0.00776753	0.121885	0.00634435	-0.351809	-0.146692	-0.268443	-0.26653	-0.276337	-0.0356214	0.166308	-0.266803	0.36347	-0.0804902	-0.170579	0.198295	0.32175	0.0147626	0.189063	0.235997	0.45849	-0.0738876	-0.225744
TCGA.H4.A2HQ	0.348483	-0.264418	-0.164077	-0.490081	0.211233	-0.0621509	0.634321	0.266485	-0.129593	-0.267616	-0.290555	-0.0140614	-0.335579	-0.214359	-0.0128693	-0.13488	-0.253041	-0.0420485	-0.230691	0.24193	0.475526	0.3995	0.0495409	-0.289397	-0.305619	-0.609524	-0.107595	0.110121	-0.456702	0.234809	-0.0890223	-0.420578	-0.461235	-0.444192	-0.482129	-0.0188024	0.179356	0.584356	0.17413	0.256824	0.164542	0.0372013	-0.154086	0.521713	-0.555376	-0.219143	0.164844	-0.063504	0.308026
TCGA.HQ.A2OE	0.145035	-0.0139323	-0.423412	-0.454011	-0.235536	0.0666101	0.368195	0.119792	-0.0836265	0.0290247	0.393914	0.176376	-0.018259	-0.0158035	-0.354111	-0.52149	-0.28146	-0.434767	-0.0882906	0.335798	0.55754	0.163885	0.199491	-0.185133	-0.0438103	-0.348276	-0.126373	-0.326092	-0.0842969	0.0274362	-0.0606673	-0.327904	-0.382003	-0.288861	-0.408989	0.0672832	0.0587961	0.0184594	0.155685	0.193925	0.07493	0.170206	0.121487	0.466298	-0.605491	0.12764	0.214419	-0.0349112	0.299603
TCGA.HQ.A2OF	0.254326	0.143264	0.336934	0.0653245	0.29803	0.210053	0.432219	0.351403	0.247969	-0.0498632	0.118125	0.157131	0.146643	0.00244783	0.0157533	-0.174358	-0.140627	-0.0650802	-0.103217	0.48486	0.416777	0.58619	0.0198382	-0.0805123	0.0365301	0.07729	-0.265411	-0.0288221	0.181211	0.0595938	-0.384499	-0.593712	-0.182088	-0.0949724	-0.206434	0.0548433	0.560622	0.111239	0.437121	0.074751	-0.0851062	0.430744	0.129525	0.446934	-0.280519	0.201248	0.110431	0.0916739	0.228597
TCGA.HQ.A5ND	0.227009	0.11748	-0.0666617	-0.174291	0.0424131	0.0338481	0.501605	0.163443	-0.0779625	-0.169701	-0.0822962	0.265861	-0.17736	0.296412	0.0118587	-0.239432	-0.25123	0.129952	0.292216	0.371843	0.449827	0.404211	-0.318418	-0.113191	0.0436447	-0.306835	0.0715731	-0.112378	-0.0954904	0.178867	-0.0668034	-0.200034	-0.0853979	-0.0180377	-0.0707661	0.350035	0.432148	0.516181	0.411016	0.229193	0.509561	0.200514	0.0525089	0.557824	-0.421591	0.131238	0.324871	0.161577	0.46145
TCGA.HQ.A5NE	0.31237	0.392648	0.0588452	0.315598	0.480771	0.0771263	0.481758	0.24426	-0.0898568	-0.217446	-0.345944	-0.241791	0.191666	0.317385	0.401637	0.507471	-0.280061	0.133253	0.0123214	0.306353	0.376085	0.481834	0.157878	0.317487	-0.199556	-0.243127	0.46175	-0.348193	-0.408641	0.434653	-0.346635	-0.383503	0.0346912	0.0651829	-0.0296832	-0.213507	0.156127	0.222093	-0.0810475	0.118978	0.291755	-0.210175	-0.275731	-0.0503189	-0.523214	-0.0762461	0.0360493	0.0567168	0.381992
TCGA.K4.A3WS	-0.130842	-0.352247	-0.242698	-0.135887	0.353933	-0.00916095	0.117941	0.150885	0.176228	0.0781518	-0.00370288	0.294412	-0.216783	0.15038	0.526077	0.401224	-0.248593	-0.102687	-0.34962	-0.284011	-0.279004	-0.150894	0.213844	-0.279458	0.109137	-0.00648913	-0.308296	-0.051176	-0.344895	0.00619453	-0.1619	0.405523	0.307339	0.247836	0.332113	-0.264809	-0.434359	-0.314912	-0.189827	-0.383637	-0.0372731	-0.106779	-0.117153	-0.374707	-0.505127	0.0136849	-0.407915	-0.214506	-0.106472
TCGA.K4.A3WU	-0.0269898	-0.196632	-0.376125	-0.114173	0.222	-0.146273	0.525962	0.0427751	0.129013	0.0714758	-0.0617692	0.22187	-0.227022	0.539518	0.450096	0.119132	-0.265872	-0.295329	-0.26621	-0.531087	-0.221208	-0.0902254	0.310465	-0.14853	-0.00642545	-0.195237	-0.0142845	-0.0764367	-0.431893	-0.0737803	-0.323934	0.438735	0.162919	0.0486954	0.175649	-0.264414	-0.40264	-0.314882	-0.35286	-0.409239	-0.0163679	-0.440284	0.00923656	0.0956591	-0.130832	-0.121566	-0.245291	-0.232508	-0.327969
TCGA.K4.A3WV	0.234215	0.0663486	-0.170174	-0.189544	0.489551	-0.00271031	0.396291	0.111888	-0.165504	-0.25627	-0.149811	-0.13528	0.0451257	-0.131282	-0.427462	-0.412408	-0.476334	-0.360139	-0.127464	0.439101	0.291815	0.537788	0.0248565	-0.0878773	-0.228707	-0.561893	0.335741	0.0187734	-0.442019	0.136017	-0.0579413	-0.537761	-0.339883	-0.245988	-0.300872	0.0571943	-0.234529	0.215342	0.0037478	0.21998	0.413185	-0.272045	-0.306686	0.323002	-0.165989	-0.243671	0.0441283	0.0125561	0.215385
TCGA.K4.A4AB	0.39634	0.341889	0.124219	0.287575	0.548606	-0.0109356	0.446553	0.261691	0.231759	0.0154698	-0.138385	0.31929	0.219967	-0.0460761	0.235044	0.383005	-0.422147	-0.181343	-0.0061668	-0.212485	0.135598	0.322669	0.23619	0.294397	0.139399	-0.35056	0.398562	-0.267532	-0.320871	0.292112	-0.242108	-0.534977	0.157767	0.168717	0.0884633	0.202429	-0.348145	0.271822	0.277624	0.120808	0.169868	0.426048	0.163602	-0.193012	-0.31726	0.216515	0.134923	-0.166578	8.06877e-05
TCGA.K4.A4AC	-0.235762	-0.612257	-0.154046	-0.460547	0.0510562	-0.0694123	0.223051	-0.105795	-0.0255145	0.184474	0.305698	-0.0887751	-0.272427	0.0134946	-0.369954	-0.340437	0.0884474	0.140812	-0.0259253	0.255092	0.138198	0.209372	-0.00343219	-0.245633	0.111021	0.0692575	-0.466959	0.0532814	-0.149507	0.154374	0.306346	0.193275	0.0683072	0.115911	0.145663	0.143603	-0.14542	0.106871	-0.11292	0.0931747	0.208717	0.150328	-0.287967	-0.206806	-0.318987	0.321788	-0.119246	0.258625	0.457156
TCGA.K4.A54R	-0.139712	-0.271866	-0.377794	-0.334467	-0.000492016	-0.161422	-0.236468	0.069417	-0.0658826	0.175482	0.265195	0.402929	-0.253588	0.335706	-0.194483	-0.469956	0.135491	-0.102665	0.0863897	-0.0565988	-0.199412	-0.236078	0.010294	-0.0790934	0.0909254	0.0474934	-0.143021	-0.0504787	-0.174232	0.269832	0.473872	0.240587	-0.0290903	0.140229	0.012356	0.24614	0.176196	0.20821	0.207814	0.374096	0.455842	-0.0679014	-0.100957	0.103952	-0.515462	0.297427	-0.0520587	0.014821	0.23828
TCGA.K4.A5RH	0.239253	0.389738	-0.0679252	0.467277	0.252763	-0.158413	-0.113826	-0.210845	-0.381786	-0.220309	-0.459321	-0.419776	-0.206163	-0.19179	0.188447	0.248175	-0.00148023	-0.0181223	-0.175568	0.170698	-0.0654295	-0.292147	0.281549	0.314073	-0.252391	-0.233805	-0.409592	-0.169873	-0.406781	0.283638	0.216413	0.559539	0.0536036	-0.071256	0.139033	-0.230106	-0.0565401	-0.0578233	-0.275011	-0.190997	0.0233696	-0.176897	-0.47898	-0.525397	-0.226329	-0.121577	-0.0988669	0.0391708	0.221061
TCGA.K4.A5RI	0.127232	0.0113518	0.15503	0.0634556	0.43751	0.109271	0.513041	0.301293	0.103236	0.261765	0.000338073	0.0638095	-0.172797	-0.0493113	0.0608795	-0.127921	0.0609774	0.00852009	0.0339075	0.143717	0.445341	0.323199	0.0221057	0.077289	0.290709	0.116849	-0.263537	-0.109374	-0.176876	0.233647	-0.386474	-0.500437	0.0103407	-0.0629631	0.0478186	0.398099	0.283083	0.612637	0.436441	0.200826	0.338227	0.382904	0.122631	0.150814	-0.619924	0.388316	0.464161	0.211874	0.42498
TCGA.K4.A5RJ	0.444788	0.581374	-0.416973	0.37607	-0.180801	0.186029	-0.00306	-0.0126399	-0.151519	-0.164545	-0.360101	0.156324	-0.0592415	-0.398062	0.0700602	0.357894	0.414244	0.0882946	0.382605	0.301539	0.366274	0.125667	0.205514	0.351389	0.0751954	-0.0534637	-0.394648	-0.168887	-0.158209	-0.0224315	0.644402	0.609225	-0.283863	-0.322413	-0.21026	0.256254	0.667008	0.555866	-0.0615983	-0.00819042	0.417175	0.0655514	0.496702	0.00855391	-0.409784	0.109594	0.505189	0.0884559	0.244609
TCGA.K4.A6FZ	0.220369	0.0166177	0.210216	0.0612032	0.506329	0.0276757	0.423916	0.178169	0.0937963	-0.0859519	-0.0416755	0.0111992	0.179111	0.285562	0.400783	-0.0598882	-0.0661602	0.0734951	-0.00217075	0.355625	0.1467	0.168775	0.305019	0.146218	-0.230682	-0.177063	0.37139	-0.424581	-0.198868	0.516104	-0.205458	-0.0231674	-0.19509	-0.107011	-0.255306	0.228067	0.135688	0.102915	0.00679829	0.361161	0.439055	-0.0479853	-0.145728	0.137819	-0.323601	0.124148	0.0911982	0.106365	0.356769
TCGA.K4.A6MB	0.281377	0.0151192	-0.034156	-0.228471	0.382068	0.226754	0.336836	0.27493	0.144967	0.0591098	0.276045	0.405222	0.017832	0.393284	0.507854	0.259313	-0.125151	-0.269855	-0.0187563	-0.160563	-0.234338	0.148209	-0.328529	-0.056303	0.269079	-0.28945	-0.292474	0.135016	-0.184421	-0.182507	-0.0789052	-0.548878	0.0548832	0.0787767	0.0971456	-0.238453	-0.207462	-0.211736	0.147551	-0.173608	0.0485346	0.014202	-0.0178825	0.19765	-0.519451	0.177623	0.0712508	-0.244587	-0.0437871
TCGA.K4.A83P	-0.424205	-0.0798074	-0.340255	-0.0897016	0.301474	0.118653	-0.573087	-0.0478961	0.291243	0.306	0.201388	0.407026	-0.114268	0.031719	0.0274636	0.232383	-0.211263	-0.0800473	-0.0070652	-0.481985	0.0331023	-0.309809	-0.102336	-0.0217339	0.312709	0.0763204	-0.0833078	0.113734	-0.0317173	0.155896	0.425757	0.69646	0.230662	0.0827462	0.293812	0.0426126	-0.382295	0.161997	0.173093	-0.15606	0.0909604	0.11411	-0.00515385	-0.377254	-0.0452515	0.0567514	-0.0329295	-0.173215	-0.344937
TCGA.K4.AAQO	-0.263071	-0.269486	-0.276065	-0.528074	-0.249045	-0.0276256	-0.0913396	0.168503	0.339833	0.260849	0.323686	0.502806	-0.313989	0.0192279	-0.0853081	-0.0459141	-0.384661	-0.0823018	-0.122549	-0.16381	0.040263	-0.00793836	-0.227881	-0.390331	0.239079	-0.0630094	-0.253567	0.0477658	-0.121817	-0.0275043	-0.00375598	0.217792	0.227945	0.182478	0.175038	0.0318232	0.213465	-0.299566	0.152955	-0.175289	-0.227582	0.143593	0.243549	0.625124	-0.322205	0.178088	0.109308	-0.119101	-0.00878514
TCGA.KQ.A41N	-0.142738	-0.247039	-0.350067	-0.0681814	0.486755	0.0889044	0.180825	0.323573	0.114731	0.167469	0.369517	0.552631	-0.325212	0.0755055	-0.323964	-0.189226	-0.241417	-0.110758	0.110721	-0.181577	-0.18073	-0.206679	-0.177835	-0.250198	0.277797	-0.434244	-0.468321	0.224838	-0.327197	-0.0784365	-0.0869535	-0.449323	-0.237278	-0.347647	-0.251719	-0.0826791	-0.330062	-0.00761305	0.26015	0.135126	-0.179663	0.132725	-0.201979	0.130814	-0.444581	0.288455	0.432712	0.033513	0.251576
TCGA.KQ.A41O	-0.266762	-0.29051	-0.379849	-0.350982	-0.346118	-0.21235	0.0644426	0.130482	0.00338017	0.0723161	0.389649	0.430625	-0.374056	-0.217621	-0.297926	-0.511411	-0.185567	-0.0383434	-0.0715908	-0.249213	0.0187801	-0.107479	-0.305711	-0.396515	0.143945	-0.517488	-0.418384	0.351271	-0.189246	-0.186821	0.182967	-0.474835	-0.308478	-0.399169	-0.348585	-0.138432	-0.33492	-0.0188371	0.159529	0.109407	-0.185362	-0.29821	-0.168966	0.0721501	-0.582673	0.201842	0.101506	0.0363225	0.16268
TCGA.KQ.A41P	0.153765	-0.0896414	-0.289745	-0.12767	0.486015	0.197142	0.21868	0.370897	0.224164	0.316235	0.147458	0.34434	-0.126993	0.175415	0.538512	0.0927096	0.0210953	-0.369537	-0.0222359	0.0112847	-0.0232024	0.018455	0.0423364	0.195579	0.437349	-0.359462	-0.420018	-0.329582	0.0183609	-0.26645	-0.355894	-0.307655	-0.238522	-0.373712	-0.257432	0.237965	0.393803	0.368325	0.011049	0.271588	0.125124	-0.143415	0.182335	0.0315078	-0.515091	0.0326065	0.626414	-0.0309116	0.107995
TCGA.KQ.A41Q	-0.199877	0.150243	-0.310331	-0.393102	-0.0148447	-0.016408	0.464841	0.112151	-0.137375	-0.0801728	0.00371186	0.229661	-0.298992	0.0335033	-0.134019	-0.498455	0.0853636	-0.245654	0.00276169	0.0969836	0.190262	0.339006	0.207803	-0.228814	0.120704	-0.396814	-0.170896	-0.049828	-0.446752	-0.182795	-0.0491813	-0.455278	-0.403708	-0.357966	-0.390925	-0.153388	-0.214494	0.262932	0.3272	-0.0503091	-0.0558765	-0.0846614	-0.118448	0.0724567	-0.47886	0.125778	0.194251	-0.17233	0.0538578
TCGA.KQ.A41R	-0.187168	-0.191885	-0.28452	-0.294533	0.21941	-0.0186086	0.0564015	0.116365	-0.0433714	0.0803131	0.380022	0.433519	-0.271809	-0.000415357	-0.111912	-0.482981	-0.0606495	-0.0667099	-0.296561	-0.313384	-0.0335391	-0.0727082	0.0237144	-0.304663	0.315393	-0.205928	-0.447119	0.107713	-0.0876137	-0.137861	0.0701201	-0.427294	-0.341923	-0.370977	-0.318326	-0.257005	-0.272157	-0.308075	-0.00218472	-0.145427	-0.245784	-0.356848	0.0222641	0.238299	-0.438636	0.224366	0.396675	-0.139605	0.0739198
TCGA.KQ.A41S	0.331612	0.585148	0.110773	0.23788	0.0682443	-0.0793544	0.443543	0.0796882	0.168454	0.0388781	-0.181693	-0.0822234	0.192513	0.30356	0.592732	0.142112	-0.383211	-0.0371452	0.158712	-0.27144	0.0421718	0.178282	0.243677	0.258986	0.194527	0.186156	-0.244258	-0.160835	-0.129718	0.229294	0.184005	-0.628244	-0.0367427	-0.0666878	-0.0237707	-0.301177	0.0776637	0.0804378	-0.0230469	-0.0305627	0.377105	-0.49279	-0.281172	-0.305485	-0.166513	-0.0979663	0.26945	-0.0387748	0.0568853
TCGA.LC.A66R	0.125481	-0.151102	-0.259679	-0.214068	0.0635093	-0.163257	-0.160323	-0.0725852	-0.218631	-0.265145	-0.343114	-0.314386	-0.250814	0.133327	0.00168463	0.109451	-0.361752	-0.0814522	0.0718182	0.461264	0.381794	0.45621	0.191811	0.0245794	-0.108504	0.132243	-0.242311	-0.131095	-0.362817	0.333506	0.0554423	0.502707	-0.120473	-0.0661774	-0.11545	-0.165196	0.217361	-0.0321835	-0.289892	-0.0912275	0.237671	-0.318596	-0.295497	-0.371959	-0.511826	-0.124271	0.294911	0.127762	0.322696
TCGA.LT.A5Z6	0.524078	0.28932	-0.382797	-0.0928887	-0.0902956	-0.0375498	0.55374	0.0577109	-0.167939	-0.174807	-0.119943	0.0808113	0.0513723	0.132395	0.337082	-0.0907751	-0.142778	-0.30013	-0.212798	0.0384414	0.467999	0.246112	0.284182	0.227308	-0.0226469	-0.490423	-0.0929792	0.0212006	-0.283546	-0.0639294	0.157535	0.0501802	-0.445552	-0.501394	-0.481361	-0.15205	0.298984	0.145149	-0.0639232	0.207401	0.0721418	-0.442358	-0.154147	0.335122	-0.510292	-0.0355891	0.307778	-0.175579	0.191111
TCGA.LT.A8JT	0.290077	0.445779	-0.0515761	0.0168651	-0.0268472	-0.0700936	0.434775	0.335252	0.346421	-0.0707594	0.281297	0.327212	-0.180857	-0.215626	0.285457	-0.165367	-0.309289	-0.0923892	-0.26765	0.219098	0.171411	0.51189	-0.185013	0.13685	0.0400874	-0.564286	-0.11768	-0.0791015	-0.127027	-0.164778	-0.584497	-0.228951	-0.376618	-0.347889	-0.356442	-0.16185	0.0107592	0.0619364	0.332392	0.112821	0.118145	0.00503212	-0.0480398	-0.445193	-0.419128	0.163026	0.353979	-0.0767491	0.0743844
TCGA.MV.A51V	0.195186	0.0324976	0.0809676	0.119013	0.577154	0.318831	0.473904	0.315464	0.183129	0.311891	0.510401	0.407607	0.0660621	0.322718	0.212654	-0.190678	-0.0229679	0.0936474	-0.0313384	-0.550035	-0.226683	-0.414979	-0.305644	-0.00933293	0.357457	0.0253574	0.274688	0.104282	0.307757	-0.00713062	-0.42885	-0.490626	0.107645	-0.0406723	0.0746935	0.0942141	-0.130817	0.304849	0.480477	0.127587	0.219506	0.251601	0.0684513	0.381955	0.0720195	0.42914	0.0271532	-0.0738045	0.061446
TCGA.PQ.A6FI	-0.354644	-0.439825	-0.173878	-0.272612	-0.171862	-0.203697	-0.0633179	-0.0401609	-0.238934	-0.0439942	0.198233	-0.167732	-0.398172	-0.132428	-0.455404	-0.290186	-0.297713	-0.186982	0.053042	0.18732	0.06953	0.173899	-0.26873	-0.472736	0.164172	0.220209	-0.439499	0.0108902	-0.0939558	0.29273	0.387295	0.132889	0.120641	0.151523	0.152219	0.168728	-0.0340667	0.211889	-0.0196607	0.0165087	0.103754	-0.221567	-0.473757	0.0314434	-0.39668	0.311707	-0.104865	0.277354	0.389214
TCGA.PQ.A6FN	0.0533782	-0.395695	-0.249718	-0.353193	0.177525	0.0569355	0.175681	0.17367	-0.0425829	0.176223	0.0058712	0.0265316	-0.241652	0.217984	-0.199891	-0.00406602	0.0522413	-0.0187229	0.332028	0.469542	0.00352313	-0.15403	0.148087	-0.0870695	0.313976	-0.0144085	-0.619256	-0.284583	0.0109186	0.264303	0.319869	-0.0242773	-0.183147	-0.211222	-0.137545	0.129007	0.246185	0.280738	0.242877	0.274661	0.281093	-0.343494	-0.0780112	0.242072	-0.422383	0.188072	0.527525	0.285605	0.50388
TCGA.R3.A69X	0.479342	0.553714	0.176636	0.422232	0.408749	0.188969	0.272705	0.350495	0.195872	0.0594001	-0.0518846	0.272146	0.271239	0.0685954	0.45828	0.466181	-0.254925	-0.0376838	-0.193659	0.314732	0.142163	0.37308	0.313675	0.416042	-0.0675502	0.0963715	-0.185242	-0.312778	-0.263679	0.35488	-0.254886	0.294599	0.19998	0.20512	0.168096	0.0725128	0.256926	0.346421	0.327964	0.19951	0.305726	0.000906327	0.211204	0.262174	-0.374387	-0.0485053	0.0123182	0.0210621	0.165845
TCGA.S5.A6DX	-0.282504	-0.0678065	-0.420639	-0.185399	-0.152553	0.218002	-0.110277	0.138518	0.021156	0.418574	0.472573	0.540884	-0.125488	0.332136	0.113368	-0.124007	0.00581842	0.109103	0.0575186	-0.400267	-0.459504	-0.242471	-0.068579	0.119249	0.455992	0.0802908	-0.622096	0.00423732	0.0856723	0.0722814	0.545083	0.438548	-0.0884413	-0.236181	-0.0250487	-0.0658248	-0.454241	-0.242603	0.292283	-0.0173933	-0.234056	0.120545	0.0562909	0.214275	-0.212814	0.418176	0.516155	0.00470062	0.112974
TCGA.S5.AA26	-0.300595	-0.268365	-0.546184	-0.384096	-0.393877	-0.08035	-0.12414	0.18324	0.08615	0.191706	0.455349	0.41687	-0.490367	-0.180027	-0.282012	-0.559515	-0.38842	-0.0411145	-0.0834939	0.0387434	-0.112543	0.399731	-0.216258	-0.404739	0.335878	-0.541585	-0.123775	0.348947	-0.255745	-0.353885	0.00830914	-0.477003	-0.338525	-0.383404	-0.353995	-0.050655	-0.216576	-0.248192	0.265295	0.0833794	-0.28968	0.0314214	-0.12077	0.168419	-0.507972	0.294209	0.425686	-0.0491844	0.0935331
TCGA.SY.A9G0	-0.186008	-0.394028	0.0505977	-0.176775	0.295612	0.073627	-0.204256	0.195302	0.170656	0.132894	-0.130061	0.14671	-0.113131	0.134994	0.447834	0.340113	-0.413028	0.0004579	-0.378346	-0.476286	0.0705241	0.105716	-0.132881	-0.282796	0.215834	0.29953	0.130493	-0.0449384	-0.242019	0.189496	-0.395675	-0.154522	0.479091	0.4292	0.47864	-0.401911	-0.392228	-0.377985	0.162713	-0.46029	-0.262099	-0.0202936	-0.245492	-0.490627	-0.128303	0.0266391	-0.408899	-0.0911043	-0.307794
TCGA.SY.A9G5	-0.37402	-0.454889	-0.245353	-0.157681	-0.146542	-0.124933	-0.301315	0.04253	-0.0569386	0.0982117	0.26322	0.2044	-0.500181	0.287226	0.245615	-0.0538063	-0.0346186	-0.267246	-0.00888471	-0.364616	-0.115821	-0.284377	0.00714245	-0.0810536	0.164622	-0.244672	-0.23017	-0.120891	-0.301857	0.271563	0.21796	0.517544	0.234621	0.252542	0.237745	-0.0579901	-0.557109	-0.0583549	-0.127228	0.200157	0.122376	0.010461	-0.366397	-0.57553	-0.555576	0.0664686	-0.0671262	-0.159188	0.00181603
TCGA.UY.A78K	0.117846	-0.503441	-0.367754	-0.314558	0.289585	-0.0818112	-0.0278634	0.0566412	-0.144282	-0.127674	-0.266725	0.127127	-0.196904	0.136405	-0.064477	0.0683067	0.189393	-0.129766	-0.179386	0.0458326	-0.156524	0.191385	0.0294488	-0.181017	0.11787	-0.454744	-0.183913	-0.0783964	0.0694691	0.372367	0.316318	0.607922	-0.286142	-0.31289	-0.275801	-0.0145909	0.341237	0.27291	-0.137121	0.102519	0.186171	-0.558269	0.00753737	0.0611102	-0.412705	-0.269928	0.443118	-0.00711948	0.179997
TCGA.UY.A78L	0.0379982	-0.059893	-0.0329682	-0.103319	0.157084	0.00885899	-0.0562614	0.028994	-0.202714	-0.186028	0.0293625	0.0502833	0.133499	0.341435	-0.280525	-0.338411	0.275149	0.145675	-0.360962	0.0635878	-0.0600168	-0.236503	-0.060552	-0.0459585	0.119344	-0.137622	0.123918	-0.148023	-0.274426	0.350442	0.512153	-0.291449	0.0432159	0.0341051	0.039564	0.211982	0.330828	0.522185	0.229263	0.405974	0.390979	-0.383168	-0.208288	0.381975	-0.212528	0.289847	0.296308	0.0490837	0.253531
TCGA.UY.A78M	0.242503	-0.106417	-0.1947	0.0111785	0.504702	0.046635	0.312493	0.287284	0.0748747	0.198081	0.247602	0.398798	-0.164329	0.188399	0.0572528	0.0988304	-0.0378927	0.0595766	0.204242	0.316602	0.091532	0.231883	0.14384	-0.122638	0.361691	-0.444728	-0.536188	-0.0824207	-0.322043	0.153683	0.0296102	-0.408818	-0.0635922	-0.169489	-0.0125129	0.0760955	0.335906	0.18925	0.0844962	0.310389	0.195035	-0.254359	-0.0410777	0.267652	-0.460332	0.192183	0.555758	0.141519	0.33386
TCGA.UY.A78N	-0.246372	-0.601499	-0.332934	-0.435669	-0.0429934	-0.0373864	0.130694	0.0834765	0.20308	0.218588	0.419933	0.31865	-0.242322	-0.120987	-0.200596	-0.534458	-0.392353	-0.320064	-0.176564	-0.179281	0.000901979	0.269321	-0.326061	-0.461799	0.378529	-0.343165	-0.702826	0.128723	0.0479033	-0.339616	0.203999	-0.504916	-0.161894	-0.275457	-0.165625	0.0468985	-0.323688	-0.0534844	0.201213	-0.19291	-0.0654372	-0.113151	-0.0204222	-0.453187	-0.443469	0.0726824	0.292671	0.00530377	0.177296
TCGA.UY.A78O	0.0610448	-0.0351478	-0.344291	-0.0971627	-0.158286	-0.168403	0.4717	0.241447	0.271065	0.398737	0.527232	0.641778	-0.0764797	-0.040067	0.188195	-0.153648	-0.0439337	-0.284315	0.118167	-0.082912	-0.16821	0.115037	-0.0514229	-0.0299869	0.359831	-0.305598	-0.187181	-0.0478866	-0.0863299	-0.226106	0.315918	-0.340449	-0.305457	-0.309677	-0.306324	-0.033756	-0.0102249	0.130512	0.262511	0.145201	-0.0754693	-0.381279	-0.0264335	0.0710838	-0.351912	0.320486	0.498451	-0.0275472	0.168982
TCGA.UY.A78P	-0.0783976	-0.0529569	0.0128157	0.0759562	0.289821	-0.0548686	-0.187913	0.113293	0.0530741	0.313075	0.147104	0.0404038	-0.228377	0.293196	0.357324	0.0149796	0.119722	-0.127755	0.242831	0.194691	0.174962	0.0578622	0.104225	0.0870204	0.263371	0.240301	-0.404004	-0.309543	-0.127688	0.336231	0.587639	0.582392	-0.13116	-0.200237	-0.188784	0.201258	0.0357125	0.20369	0.232807	0.241683	0.285417	-0.0625593	-0.15682	-0.0536547	-0.238054	0.292443	0.548262	0.11273	0.349033
TCGA.UY.A8OB	-0.10088	-0.12355	-0.064233	-0.147057	-0.0856605	-0.0753815	-0.121846	-0.0116096	-0.122445	0.0602338	0.144228	-0.120495	-0.0894395	0.360754	-0.0177317	-0.268485	-0.288338	0.155184	0.38829	0.141923	-0.0921022	0.314559	-0.425059	-0.100058	0.200307	0.132181	-0.548816	0.0464623	-0.16493	0.068426	0.431586	0.158913	0.0950004	0.152496	0.115875	0.280875	-0.309348	0.389694	0.282483	0.17234	0.508088	0.192918	-0.368401	0.104961	-0.226413	0.415282	-0.0290642	0.186244	0.420606
TCGA.UY.A8OD	-0.502744	-0.368787	0.254756	-0.246739	0.324215	-0.0174232	-0.433473	0.191927	0.168589	0.40194	0.380413	0.39074	-0.181363	0.22582	-0.0772553	0.016929	0.011545	-0.187911	-0.0718104	-0.606336	-0.449947	-0.397959	-0.323216	-0.304484	0.306359	-0.0232186	-0.255266	0.248697	-0.180775	0.0793262	0.56091	0.0956029	0.337013	0.148932	0.354768	-0.263501	-0.593624	-0.231527	0.300963	-0.258105	-0.0414251	0.0635202	-0.179868	0.370004	-0.23248	0.365348	-0.0566972	0.037246	0.00502191
TCGA.UY.A9PA	0.186292	0.161221	0.282797	-0.248801	0.127278	0.0707635	0.329804	0.223488	0.033847	-0.0729581	0.119331	0.0115208	0.187521	0.26981	0.328674	0.0445579	-0.184326	0.0776852	-0.0442413	0.223264	0.370437	0.376853	0.0791993	0.0749501	-0.184723	-0.218438	0.612997	0.006573	-0.281805	0.339439	-0.0606351	0.16168	-0.313093	-0.238319	-0.342104	0.166495	0.0710061	0.272894	0.221952	0.10166	0.346757	0.148819	-0.140923	-0.451348	-0.440673	0.347969	0.0897524	-0.0520526	0.0639886
TCGA.UY.A9PB	-0.310891	-0.00482582	-0.0875564	-0.0802738	-0.0184315	-0.327566	-0.237765	-0.145984	-0.293457	0.00365782	-0.130916	-0.338056	-0.266669	-0.0768143	0.0485349	0.0670408	0.171771	0.0785523	0.0918897	0.138658	0.217517	-0.161771	0.100011	0.125587	-0.22128	0.184801	-0.381401	-0.152697	-0.463973	0.360237	0.423305	0.552232	0.19397	0.195764	0.172698	0.0382521	-0.459333	-0.147964	-0.0615755	-0.13343	0.226424	-0.316673	-0.434409	-0.264373	-0.492322	-0.215937	-0.345313	0.087415	0.284294
TCGA.UY.A9PD	0.0160884	-0.19404	-0.3236	-0.147216	0.122396	0.0997111	0.0887848	0.186626	0.21841	0.149844	0.0750499	0.311134	-0.251447	0.0942488	-0.127314	-0.1921	0.118302	-0.185657	-0.0716851	0.266783	0.173066	0.118136	-0.176374	-0.306818	0.387379	-0.362533	-0.396213	-0.0211608	-0.0243405	-0.0441083	0.215104	-0.392053	-0.046018	-0.0829619	-0.0477919	0.0501636	0.152692	0.0235882	0.461476	0.0663384	0.144152	0.176108	0.193895	0.322558	-0.57305	0.195567	0.435914	0.0419529	0.295372
TCGA.UY.A9PE	-0.0440417	-0.255295	-0.188505	-0.405589	0.133295	-0.0740664	-0.166011	0.0109672	-0.022447	0.272719	0.277906	0.343112	-0.36488	0.070725	0.135988	-0.374063	-0.106874	-0.0768118	-0.195609	-0.017436	-0.0371647	-0.0367307	0.199939	-0.314056	0.271264	-0.234196	-0.53217	0.0118085	-0.196097	-0.0292556	0.258104	-0.469106	-0.185515	-0.189957	-0.0874696	0.114546	-0.249619	0.186321	0.257672	0.195124	0.191161	-0.0506614	0.13124	0.0451053	-0.400785	0.268711	0.296691	0.011434	0.249929
TCGA.UY.A9PF	0.315213	0.127899	0.184755	0.208222	-0.0420432	0.0915325	0.386133	0.287231	0.358241	0.27742	0.268891	0.455529	-0.0931107	0.189076	0.337209	0.204203	-0.342517	-0.042305	-0.0143547	-0.0845912	-0.146573	-0.0194217	-0.189387	0.0537704	0.308299	-0.299456	-0.20441	-0.0768185	0.194609	-0.0396472	-0.425854	-0.0508267	0.0048362	-0.0754174	-0.0463614	-0.0353304	0.136101	-0.234556	0.175915	-0.0500048	-0.364143	0.30897	0.240401	0.28908	-0.22987	0.126705	0.386643	-0.119367	0.0700586
TCGA.UY.A9PH	0.0478477	0.108205	-0.252823	-0.13016	0.144943	0.107349	0.0858613	0.211912	0.0840876	0.256792	0.360221	0.35065	-0.134363	0.166076	0.249418	-0.00119254	-0.167804	0.0944406	-0.0314941	-0.245754	-0.236526	-0.0594901	0.00675953	0.0254149	0.267111	-0.383433	-0.34941	0.137248	-0.217749	0.0827842	0.539407	0.618223	-0.317043	-0.328432	-0.268193	-0.0303882	-0.0228108	0.114142	0.195551	0.0887133	0.041694	0.0170285	-0.024635	0.576876	-0.363756	0.31771	0.511845	-0.112375	0.0815522
TCGA.XF.A8HB	0.32509	-0.142257	-0.323416	0.026128	0.0229282	-0.205004	0.426624	0.130471	-0.0225305	0.150637	0.102934	0.182662	0.0181737	-0.00965764	0.111477	0.130871	-0.156781	-0.0951975	0.286934	0.460592	0.267516	0.252965	-0.0595384	0.101126	0.347875	-0.475377	0.26129	-0.168589	0.160801	-0.161721	-0.0164669	-0.479941	-0.401404	-0.426102	-0.399562	0.267938	0.581384	0.432799	0.236115	0.107167	0.287469	-0.186376	0.305637	0.119061	-0.442221	0.0062846	0.624364	0.142696	0.454482
TCGA.XF.A8HC	0.102993	-0.20368	-0.330655	-0.134621	0.0441087	0.0539301	0.407525	0.121217	-0.0804158	0.0369315	0.318462	0.23074	-0.221717	0.102198	-0.211676	-0.496082	0.297995	-0.0926705	-0.142222	-0.0497728	0.151073	-0.20167	0.0603083	-0.14128	0.13967	-0.418421	-0.513293	-0.0580133	-0.0929482	-0.166384	-0.465746	-0.471002	-0.393873	-0.47085	-0.400776	0.00645385	0.371727	0.343721	0.40412	0.172295	-0.0136772	0.239773	0.241185	0.284988	-0.11365	0.371086	0.459443	-0.0185283	0.28681
TCGA.XF.A8HD	0.314222	-0.195314	-0.00714251	-0.104203	0.101376	-0.279557	0.198565	0.0965201	-0.0818946	-0.0565541	0.121336	0.302602	-0.143137	0.0499481	-0.0874236	-0.269937	0.245155	0.0904474	0.0995653	0.016082	0.191262	0.123001	0.171203	0.103152	-0.0748228	-0.487575	-0.0807086	-0.0787976	-0.181211	0.192383	0.485905	0.287889	-0.0539327	-0.0752958	-0.0345438	-0.12407	-0.278136	0.110282	-0.0623511	0.0358466	0.295048	-0.498358	-0.276843	-0.381376	-0.553529	0.0847797	0.0530632	-0.000954735	0.332992
TCGA.XF.A8HE	-0.208474	-0.610793	0.0242526	-0.46662	-0.0784882	-0.127142	-0.29177	-0.174103	-0.315637	-0.250293	0.0832263	-0.141729	-0.394337	-0.0930008	-0.489697	-0.618745	-0.234612	-0.044492	0.276229	0.459448	0.37032	0.305031	-0.168241	-0.369908	0.128453	-0.0593689	-0.0573917	-0.0926943	0.0178681	0.20132	0.134122	0.405996	-0.15066	-0.0535084	-0.139736	0.168733	0.131586	0.120427	-0.192946	0.160242	0.161391	-0.45375	-0.218395	0.65601	-0.389212	-0.0176273	0.205997	0.013593	0.271305
TCGA.XF.A8HF	0.193823	0.302017	0.13824	-0.00700532	0.133295	0.0641024	0.127205	0.256798	0.287091	0.352587	0.409335	0.473014	-0.0431278	0.375539	0.414956	0.262711	-0.0432974	-0.135272	0.0889382	-0.407949	-0.293073	-0.313919	-0.379914	0.00401836	0.350667	-0.245911	-0.64418	0.00963802	-0.0594089	0.0631707	0.253982	-0.197434	-0.123185	-0.116323	-0.0790628	-0.116283	-0.138665	0.00237635	0.467497	0.0340788	0.134152	-0.0380147	0.151733	0.158433	-0.222752	0.367632	0.532379	0.081015	0.190869
TCGA.XF.A8HG	0.0539989	0.297148	0.0377148	-0.150744	0.147036	0.0985775	0.457463	0.306829	0.162128	0.283058	0.466466	0.440667	0.0134398	0.173844	-0.155497	-0.204636	0.178295	0.111253	-0.13363	-0.346428	-0.127347	0.272433	-0.260031	-0.0780545	0.21633	-0.165212	-0.137754	0.033611	-0.151613	-0.432813	-0.0837022	-0.413306	-0.258928	-0.287017	-0.263213	-0.138766	-0.0107839	-0.0266208	0.330271	0.111414	0.0760538	-0.178931	0.0392079	0.153764	-0.23005	0.428471	0.0418097	-0.064049	0.0247339
TCGA.XF.A8HH	-0.153532	-0.117243	-0.0701749	-0.0859773	0.196002	-0.00247062	0.0877446	0.148575	0.335637	0.366143	0.492513	0.547202	-0.105047	0.411233	0.202977	0.0857274	-0.188142	0.103319	-0.119184	-0.538031	-0.437063	-0.367321	-0.408484	-0.249065	0.197826	0.192429	-0.201821	0.222279	-0.00959264	-0.393475	0.425204	-0.253523	0.165508	0.111562	0.131683	-0.252729	-0.573702	-0.223726	0.214841	-0.0412644	0.0336662	-0.0882291	-0.171227	-0.126715	-0.0832315	0.386648	-0.380636	-0.217301	-0.238992
TCGA.XF.A8HI	-0.12687	0.365136	-0.10396	-0.213961	-0.119701	-0.0828719	0.395853	0.170713	0.00171437	-0.171093	0.00355747	0.0907214	-0.238177	-0.119458	-0.112184	-0.259964	-0.258846	-0.136229	-0.418798	0.331414	0.364236	0.576097	0.103828	-0.0406552	-0.0703008	-0.478603	0.0382223	0.0558758	-0.210516	0.0286635	-0.248133	-0.459215	-0.28813	-0.359432	-0.335856	0.00304992	0.0499235	0.162522	0.053093	0.0316469	0.164031	-0.0882583	-0.203634	-0.141051	-0.424527	0.0400607	0.21637	-0.137561	0.152545
TCGA.XF.A9SH	-0.115054	0.0610276	0.019974	-0.290072	-0.0943402	0.0845484	0.109078	0.343556	0.320124	0.335082	0.38282	0.406541	-0.0528334	0.013168	-0.13021	-0.124354	-0.258418	-0.0816308	0.054842	0.0544283	-0.153781	0.231785	-0.27113	-0.0722282	0.216899	-0.45198	0.00632166	0.0574906	-0.0559593	-0.130889	-0.442692	-0.38424	-0.298496	-0.266292	-0.290393	0.227669	-0.0978682	0.480797	0.251056	0.0528883	0.0677733	0.452089	0.414403	0.0271681	-0.194764	0.392027	0.339552	-0.0259922	-0.118688
TCGA.XF.A9SI	-0.153349	0.262997	-0.266704	0.269656	-0.180776	0.125561	-0.184331	0.0288389	0.0566918	-0.0248392	-0.223891	0.00347138	-0.227807	0.157114	0.437715	0.50506	0.00745678	-0.189903	0.122189	-0.021425	-0.0746978	0.439356	-0.0401614	0.262973	0.123411	-0.00538154	-0.359329	-0.128668	-0.302148	0.276476	0.460087	0.78221	0.190921	0.0574067	0.160723	-0.301523	0.175358	0.074427	-0.387551	-0.173298	-0.18014	-0.313549	-0.127135	-0.334851	-0.332456	-0.360346	0.0914144	-0.0048709	0.116367
TCGA.XF.A9SJ	0.201029	0.38111	-0.185837	0.182116	0.309555	0.239281	0.328228	0.226981	-0.0794474	0.198766	0.237261	0.135184	0.1943	0.131594	0.0674029	0.204191	0.215005	0.301934	0.00398457	-0.092971	-0.346282	-0.14567	0.0995697	0.269886	0.348016	-0.18084	-0.414442	-0.0601075	0.0245012	0.298757	0.343	0.409475	-0.00433426	-0.0731643	0.0639224	0.157245	0.340847	0.47335	0.410493	0.317861	0.55902	-0.198183	-0.0663433	0.537564	-0.49947	0.317283	0.534064	0.238137	0.385326
TCGA.XF.A9SK	-0.079128	0.278155	-0.208212	-0.00665275	0.337293	-0.0219639	0.166743	0.25435	0.0620065	0.311322	0.272981	0.253831	-0.174573	0.428802	0.273876	0.149818	-0.417194	-0.16341	-0.245887	-0.275352	-0.349186	-0.338827	0.126038	0.308662	0.201662	-0.315595	-0.515374	0.00991248	-0.317956	-0.15642	0.0223089	0.310372	0.0795715	-0.0407724	0.073437	-0.00721224	-0.4128	0.0804	0.337175	0.0688501	0.15633	0.114901	-0.247867	-0.137115	-0.292203	0.308975	0.180378	-0.168222	-0.142964
TCGA.XF.A9SL	-0.196123	-0.113335	-0.0186719	0.0912756	0.389293	-0.0609255	-0.174745	0.0304836	0.0769321	0.403882	0.240007	0.451867	-0.161815	0.26492	0.42993	0.345625	-0.247114	0.124095	0.0980364	-0.461811	-0.279471	-0.362089	0.105736	0.0174151	0.427634	0.129204	0.00867786	0.097599	-0.106714	0.10178	-0.0455981	0.527815	0.377734	0.146477	0.371246	-0.0632659	-0.0928496	-0.171589	0.104156	-0.0929132	0.13136	0.0175619	0.0450275	-0.360571	-0.000150722	0.265109	0.329636	-0.0214122	-0.0307827
TCGA.XF.A9SM	0.102114	0.0814687	-0.366173	0.150652	0.186247	-0.290895	0.177413	-0.156183	-0.218013	-0.101319	-0.231354	-0.221778	-0.173046	0.0220305	0.321344	0.20469	0.0194503	-0.108054	0.092597	0.298205	0.274774	-0.0916626	0.325131	0.306739	-0.1101	-0.0324388	-0.452123	-0.305617	-0.512603	0.251103	0.579774	0.70882	0.0206064	0.0199005	-0.0436976	-0.0122592	-0.201971	0.157134	-0.273738	0.0590411	0.378389	-0.26276	-0.359962	-0.31989	-0.368954	-0.121103	0.1837	0.0678119	0.310359
TCGA.XF.A9SP	0.115009	0.291286	-0.0878884	0.120057	0.411199	0.00698321	-0.0491333	0.119238	-0.0390171	0.215689	-0.243751	0.00317878	-0.2623	0.0322202	0.350951	0.272157	-0.186872	-0.0598029	-0.292438	-0.0638878	-0.176988	-0.160634	0.0906805	0.063245	0.307333	0.126581	-0.597339	-0.196816	-0.195157	0.324186	0.165335	-0.0692254	0.237694	0.187068	0.227354	-0.227785	-0.100505	-0.0450313	0.0749021	-0.274743	0.262518	-0.0196022	-0.0205327	-0.531615	-0.193285	0.14074	0.279899	0.0494316	0.162261
TCGA.XF.A9ST	0.48859	0.0524638	-0.478838	0.0422092	-0.145032	-0.322391	0.137812	-0.177454	-0.263168	-0.324289	-0.295712	-0.184351	-0.226563	-0.0857579	-0.236287	-0.342001	0.442052	-0.437938	0.012762	0.553715	0.45396	0.47835	-0.00989486	-0.0400859	0.22443	-0.224224	-0.473774	-0.312121	-0.0962268	-0.0152233	-0.00598964	-0.531644	-0.306692	-0.209982	-0.326379	0.168152	0.408163	-0.0551713	0.0977227	0.305137	0.450702	-0.220303	-0.12858	0.143427	-0.587524	-0.072244	0.523458	0.147465	0.362492
TCGA.XF.A9SU	0.0483221	0.0742989	-0.205554	-0.011454	0.45191	0.0234049	0.277174	0.350818	0.216142	0.350473	0.310748	0.485673	-0.124676	0.227104	0.0982976	0.261339	-0.107624	0.109096	-0.120521	0.0091357	-0.224417	-0.375911	0.0382799	0.0791393	0.392447	-0.0654087	-0.530592	-0.098263	-0.32172	0.214257	-0.0361929	-0.0674861	0.0806194	0.00601715	0.189702	-0.0683378	-0.248045	0.0677089	0.232599	0.152807	0.228172	-0.0987229	-0.037208	0.0804303	-0.388322	0.307812	0.532906	0.103247	0.324755
TCGA.XF.A9SV	0.276443	0.201399	-0.0586658	-0.193885	-0.0712015	-0.0606457	0.408825	0.291452	0.321836	0.33419	0.425611	0.572439	-0.239777	-0.145606	-0.0508653	-0.100427	0.0420297	0.0297212	0.237506	-0.050065	0.177326	0.215301	0.116603	0.0420123	0.294492	-0.206795	-0.321171	0.0426891	-0.36913	-0.0114392	-0.111439	-0.543734	-0.0224478	-0.100933	-0.112872	-0.0154719	-0.140404	0.110133	0.223117	0.145891	0.127388	-0.164872	-0.0505485	0.138713	-0.433803	0.317322	0.356312	-0.142764	0.0974948
TCGA.XF.A9SW	-0.526736	-0.257137	0.0947119	0.133124	0.236347	-0.0913002	-0.442764	-0.129211	-0.0446367	0.364476	0.225307	0.270525	-0.309185	0.108225	0.258588	0.311322	-0.147996	0.374393	-0.062408	-0.468932	-0.269278	-0.492601	0.0416506	-0.228595	0.415826	0.0169359	-0.308876	0.0328968	-0.0170453	0.142506	0.0634045	0.0658237	0.477621	0.335899	0.484875	0.0865713	-0.137957	-0.187558	-0.0990253	-0.256722	0.0119284	-0.0998038	-0.208006	-0.664934	-0.198658	0.256585	0.258796	-0.0313561	-0.0677301
TCGA.XF.A9SX	-0.132175	0.196387	-0.396187	0.37319	0.0164098	-0.142294	-0.313574	-0.0307461	-0.272269	0.293737	-0.0797994	-0.0303082	-0.149403	0.291521	0.104585	0.124547	0.0656595	0.201766	-0.0997429	0.0336701	-0.183293	-0.23582	0.1356	0.226181	0.215623	0.253372	-0.435602	-0.235836	-0.431824	0.151691	0.321842	0.498582	0.161549	0.0525991	0.0981928	-0.149898	-0.424481	-0.0317463	-0.122676	-0.104709	0.21777	-0.189004	-0.407857	0.0688565	-0.253687	-0.0658693	0.336526	-0.0362438	0.225812
TCGA.XF.A9SY	0.0717257	-0.367896	0.0868673	-0.0806913	0.159092	-0.255986	-0.402644	-0.149879	-0.28424	-0.223738	-0.358902	-0.430572	-0.0351198	0.254208	0.0500889	-0.126398	-0.0152149	-0.137782	-0.103853	0.348857	0.350574	0.363088	0.0736495	-0.111517	-0.126536	0.26497	-0.201014	-0.209156	-0.456984	0.314509	0.270846	0.585937	0.327381	0.288019	0.296925	0.190278	-0.151373	0.229814	-0.346631	0.0286149	0.338398	-0.413267	-0.452108	-0.139422	-0.635665	-0.256878	-0.397296	0.175393	0.342012
TCGA.XF.A9SZ	0.205479	0.098838	-0.128293	0.0367185	0.619625	0.206445	0.309886	0.0996241	0.0702422	0.221057	0.238965	0.366555	0.00152602	0.366696	0.208675	0.104138	0.0380861	-0.0123283	0.0590104	-0.188545	-0.164969	-0.537315	0.300162	0.0382436	0.213381	0.17661	-0.490976	0.0699661	-0.217308	0.28564	0.361134	-0.103335	-0.0115469	-0.156411	0.0936423	0.0236412	-0.197816	0.0229126	0.215692	0.312503	0.532308	-0.0969959	-0.261361	0.200242	-0.495971	0.314531	0.385236	-0.117439	0.0927617
TCGA.XF.A9T0	0.124952	-0.508738	-0.148626	-0.480422	0.19345	-0.0633681	0.0681201	0.219995	0.0777785	-0.0815195	0.0850964	0.328479	-0.377678	-0.000638139	-0.0813321	-0.0764333	-0.185823	-0.0276516	-0.0692014	0.424714	0.174184	0.240597	0.146689	-0.353203	0.232719	-0.501263	-0.344991	-0.0348546	-0.153192	-0.074994	0.109364	-0.237293	-0.365147	-0.388089	-0.333457	0.0531964	-0.0102276	0.170997	-0.0499314	0.370602	0.0523611	-0.318954	-0.0693464	-0.094825	-0.496126	0.099245	0.42987	-0.0676272	0.131391
TCGA.XF.A9T2	-0.281677	-0.421625	-0.291757	-0.178067	-0.281207	-0.239746	-0.163672	-0.244803	-0.300042	0.033007	-0.0529683	0.068559	-0.293866	-0.399156	-0.565244	-0.66091	0.00803863	-0.344169	-0.291014	0.280102	0.322518	0.381521	-0.327652	-0.45115	0.112924	0.19032	-0.449739	0.078665	0.0451181	0.0600252	-0.110797	-0.266018	-0.0191797	-0.0476389	0.0104769	-0.0240091	-0.253188	0.0442764	-0.311155	-0.178377	-0.327465	-0.318612	-0.161645	-0.448993	-0.346862	-0.255758	0.218479	0.159032	0.164539
TCGA.XF.A9T3	-0.0306685	-0.155785	-0.165573	-0.0491201	0.256002	0.0649793	-0.0482678	0.109023	-0.092236	-0.102666	-0.329438	0.0173025	-0.314868	0.134385	-0.290389	-0.0500348	-0.180403	-0.0986786	-0.135673	0.261334	0.0428171	0.279443	0.362211	-0.00655456	0.0535214	0.232876	-0.22255	-0.334917	-0.310759	0.296841	0.210182	0.182266	0.323922	0.171482	0.29733	-0.228263	-0.229858	-0.152475	-0.4538	-0.217103	0.275424	-0.49269	-0.307338	-0.514344	-0.341292	-0.24009	-0.0493066	0.162232	0.393646
TCGA.XF.A9T4	0.130079	0.117244	0.378516	0.0784731	0.569578	-0.097505	-0.00119951	0.123491	0.158252	-0.202406	-0.00160267	0.0724153	-0.0203485	0.521287	0.51005	0.0749573	0.0291978	0.053321	0.174052	0.104762	0.237877	0.354725	0.0627767	0.20097	-0.124453	-0.0265915	0.302291	-0.210539	-0.216612	0.410625	-0.346793	-0.18709	0.0711488	0.2654	0.0674328	-0.0071961	-0.0842549	0.195181	-0.0300696	0.182582	0.412276	-0.249197	-0.332593	-0.224457	-0.604074	0.103173	-0.366208	0.0407022	0.293393
TCGA.XF.A9T5	-0.267022	-0.139299	-0.351511	-0.0300739	0.0032103	-0.206923	-0.0425886	-0.178474	-0.167395	0.0388618	-0.0629909	-0.219484	-0.39779	-0.145456	-0.158066	0.0490076	-0.0158063	0.225682	0.020194	0.268843	-0.0173684	0.207327	0.0755437	-0.0851554	0.432482	-0.25782	-0.320389	-0.0645891	0.0712217	0.094601	0.496659	0.644228	-0.0314306	-0.169593	-0.0138645	0.274451	0.463138	0.433816	-0.182764	0.0679629	0.407319	-0.138281	-0.214987	-0.0369561	-0.402474	0.164831	0.542687	0.188055	0.442502
TCGA.XF.A9T6	0.0715893	0.0932394	-0.21259	-0.126635	0.0882879	-0.182931	0.201517	0.0176188	-0.266761	0.0178451	-0.224015	-0.126529	-0.353786	0.106996	-0.0840909	-0.139336	0.209586	-0.0053505	0.134196	0.41914	0.123828	0.503165	0.233185	-0.0654178	0.073969	-0.1158	-0.445977	-0.117678	-0.241724	0.268239	0.0993033	-0.227005	-0.331998	-0.31631	-0.318324	0.125077	0.115836	0.350624	-0.178308	0.189469	0.420019	-0.258895	-0.0651261	0.0669017	-0.631712	-0.0194021	0.496725	0.158587	0.472137
TCGA.XF.A9T8	-0.293979	-0.373148	0.128776	-0.175989	0.373248	-0.00493125	-0.527019	-0.0375665	0.202983	0.0335552	0.163348	-0.00388002	-0.27093	0.170893	-0.0512948	0.107672	-0.106419	0.0652462	0.18767	0.144805	0.103333	-0.244665	0.0982021	-0.033732	0.339172	0.160914	-0.140022	0.0759429	-0.0501416	0.294953	0.438122	0.612593	0.186484	0.172749	0.168531	0.228754	-0.00843887	0.458344	-0.305476	0.338767	0.411618	-0.347402	-0.298335	0.517961	-0.143274	0.196264	0.420311	0.153501	0.353161
TCGA.XF.AAME	-0.144065	0.102152	0.00329785	0.395847	0.372877	-0.128418	-0.387839	-0.130653	0.115485	0.265221	0.00595928	0.0415501	-0.202333	0.330161	0.455959	0.594662	-0.396552	0.0348829	-0.229539	-0.420259	-0.154486	-0.30884	-0.0521504	0.0629988	0.223277	0.370623	-0.32955	-0.121747	-0.141314	0.152269	0.136081	0.616	0.426117	0.276665	0.445755	-0.270726	-0.549622	-0.321187	-0.339402	-0.360566	-0.00717625	-0.252843	-0.191376	-0.622689	0.00743342	0.169497	-0.292316	-0.0541783	-0.163692
TCGA.XF.AAMG	0.216723	-0.409411	-0.450607	-0.396178	0.0678687	0.0207636	0.175834	-0.162331	-0.350668	-0.303886	-0.349364	-0.216946	-0.135131	-0.489187	-0.274197	-0.159457	0.223825	-0.453571	-0.340753	0.24721	0.382236	0.234409	0.082802	-0.361365	-0.072761	-0.644455	-0.211714	-0.287991	-0.329095	0.252217	0.391623	-0.407967	-0.28945	-0.279691	-0.337072	-0.33806	-0.337326	0.0363574	-0.00315863	-0.192945	-0.370253	-0.321557	-0.0914199	-0.369614	-0.547981	-0.338429	0.235554	0.0531569	0.264215
TCGA.XF.AAMH	-0.0257051	0.386596	-0.229272	0.472334	-0.43105	-0.095781	0.243843	0.240291	0.120638	0.291559	0.383134	0.447487	-0.0477561	0.0307583	0.420588	0.115606	-0.024696	-0.114673	0.212462	-0.228961	-0.157793	0.0473674	-0.218303	0.132387	0.341203	0.324145	-0.532378	-0.0686384	-0.118239	-0.0939049	0.152042	-0.174806	-0.00929642	0.10247	-0.00391724	0.096734	-0.373935	-0.102144	0.0699623	0.0269929	0.00450797	-0.23507	-0.207683	0.143317	-0.233647	0.294908	0.505941	0.155638	0.198185
TCGA.XF.AAMJ	-0.418549	-0.389564	0.23463	0.154192	0.610868	0.117266	-0.46678	0.0786886	0.164538	0.336897	0.514102	0.478093	-0.187309	0.26289	0.00657267	0.284413	-0.282754	0.102494	-0.229229	-0.589812	-0.435345	-0.508598	-0.472758	-0.35529	0.210031	0.0808886	-0.0636003	0.354483	-0.307433	-0.033744	-0.000887587	-0.13515	0.48077	0.351431	0.487869	0.0226086	-0.603183	0.202913	0.383568	0.0306588	0.134149	0.339328	-0.234935	-0.380826	0.00648803	0.489147	-0.506481	-0.130085	-0.302576
TCGA.XF.AAML	0.462756	0.0740207	-0.17476	-0.157285	0.309016	-0.0445521	0.256857	0.0838692	-0.0396561	-0.159495	-0.0501689	0.264172	-0.243364	0.176774	-0.0759277	-0.199732	-0.0496585	-0.0641824	-0.114738	0.303381	0.206521	0.332679	0.0826421	-0.0657067	0.00730904	-0.453429	-0.394283	-0.150428	-0.16648	0.0851096	-0.152327	-0.0454365	-0.412475	-0.375288	-0.393956	0.168748	0.247044	0.419446	0.23103	0.285001	0.38429	-0.188008	0.0907661	0.397028	-0.479055	0.0997876	0.281225	0.00785301	0.280864
TCGA.XF.AAMQ	0.149121	-0.246391	-0.0181714	-0.324231	0.139725	-0.237317	0.152982	0.196667	0.185437	0.13826	0.399381	0.461341	-0.0836985	0.0717435	0.132842	-0.200674	-0.207732	-0.236945	-0.0456856	0.351096	0.415713	0.503768	-0.104583	-0.0727266	-0.076577	-0.261983	0.17201	-0.286162	-0.319768	0.273411	-0.103092	0.465535	-0.262154	-0.183999	-0.252623	-0.179225	0.0527974	0.0318004	-0.0354363	-0.0800052	0.0589368	-0.232825	-0.240431	-0.336132	-0.511153	0.050596	0.0615551	0.0311987	0.291009
TCGA.XF.AAMR	-0.429498	0.398634	0.0058042	0.0418525	-0.501545	-0.0498708	-0.121279	-0.0181906	0.155808	0.289849	0.422728	0.324969	-0.394349	-0.339382	0.129415	0.462929	-0.523182	-0.116759	-0.295879	-0.232761	0.0521975	0.158336	-0.00627829	0.21465	0.251226	0.259974	0.1808	-0.0818074	-0.1842	0.0841039	-0.134407	-0.455771	0.422308	0.317603	0.407291	0.0173616	0.266611	-0.0429231	0.339705	-0.0885032	0.218285	0.136311	0.14537	-0.553317	-0.129042	0.239618	0.0496607	-0.191942	-0.271713
TCGA.XF.AAMT	0.0280028	0.355196	0.0281996	0.387419	0.352877	-0.215515	-0.128715	-0.0759943	-0.294372	0.0419509	-0.250592	-0.336271	-0.194038	-0.193557	0.0010042	0.226153	-0.268604	0.114318	-0.181242	-0.163505	0.0816445	0.280328	0.0775805	0.14693	-0.0904629	0.378327	-0.120135	-0.0440386	-0.45812	0.344881	0.329684	0.0176229	0.338238	0.360861	0.333675	-0.105967	-0.510384	0.0442388	-0.292681	-0.158943	0.105379	-0.205252	-0.515755	-0.426267	-0.451072	-0.042915	-0.462418	-0.115866	-0.0437664
TCGA.XF.AAMW	0.005317	0.183863	0.336272	0.0739592	0.438633	-0.107674	-0.0139604	0.0803302	0.162765	-0.218113	-0.0868627	-0.178235	-0.0726735	0.396734	0.494833	0.293859	-0.263838	-0.010354	0.130175	0.220005	0.235994	0.423942	-0.0328681	0.0503342	0.180121	0.201076	0.153279	-0.210134	-0.199775	0.378866	-0.10089	0.0352202	0.337815	0.433037	0.274637	-0.135705	-0.274632	-0.127716	0.113411	0.041441	0.436941	-0.221266	-0.486525	-0.637545	-0.618661	0.124027	-0.19748	0.0773144	0.31319
TCGA.XF.AAMX	0.27081	0.29451	-0.1371	0.155046	0.367719	0.0447672	0.223792	0.105964	0.229899	0.0171357	0.21683	0.32563	-0.190079	0.14135	0.255382	-0.12409	-0.116955	0.19192	-0.161647	0.0461769	-0.103314	0.101743	-0.0545391	-0.173519	-0.0609373	-0.451935	-0.0688348	0.223881	-0.149335	-0.179319	0.28002	-0.559108	-0.333046	-0.286447	-0.254724	-0.215697	-0.0238732	-0.0190645	0.28724	-0.0544564	0.23915	-0.281361	-0.0410667	0.372421	-0.629159	-0.120981	0.0576551	-0.153277	0.0594014
TCGA.XF.AAMY	0.0994058	-0.303227	0.109581	-0.0718225	0.227793	0.0511922	-0.136132	0.298711	0.242935	0.0285304	0.0326911	0.231123	-0.170779	0.150011	0.264095	0.114553	-0.29177	0.0964683	-0.208072	-0.253027	-0.288481	0.193596	-0.295236	-0.0767342	0.124341	-0.122288	-0.412783	-0.0956575	-0.350752	0.154293	0.0854427	-0.477988	0.0428525	0.03277	0.114445	-0.124332	-0.343992	-0.0116014	-0.168095	-0.133251	-0.175871	-0.054013	-0.0140712	-0.453276	-0.518972	-0.0809551	-0.228665	-0.206292	-0.209681
TCGA.XF.AAMZ	-0.0294672	-0.395659	-0.409915	-0.348383	-0.0795687	0.154796	0.179802	0.254886	0.184377	0.219288	0.487912	0.577489	-0.202214	-0.0233381	0.042314	-0.274958	-0.168842	-0.14202	0.0989618	0.215369	0.252117	0.276744	-0.255654	-0.351727	0.312074	0.0572252	-0.249303	-0.2067	0.176559	0.113245	-0.207417	0.0908099	-0.312002	-0.290735	-0.261567	0.194901	0.278924	0.125276	0.190234	0.273402	0.247405	0.154074	0.13482	0.436312	-0.461894	0.257143	0.356626	0.119547	0.300524
TCGA.XF.AAN0	-0.0730898	-0.00947076	0.0995372	-0.0787105	-0.0442785	-0.232529	-0.192133	-0.0656282	-0.0341143	-0.0737211	-0.000983271	0.0295802	0.0888454	0.489438	0.18971	-0.368039	-0.279658	-0.0956412	0.21074	-0.371782	-0.176029	0.251326	-0.0460414	-0.0575767	0.0891628	-0.189893	0.290962	0.223793	-0.358454	0.0773876	0.227997	0.3189	-0.225253	-0.0634464	0.000765187	-0.170246	-0.293491	0.00284928	0.120875	-0.0107388	0.310508	-0.382896	-0.403654	-0.103549	-0.19015	0.0283025	-0.132051	-0.190951	-0.0743705
TCGA.XF.AAN1	0.000487026	0.123525	-0.0878515	-0.209017	0.0120903	0.0246564	0.0948931	0.271968	-0.0686657	0.127532	0.261684	0.18424	-0.278328	-0.0357375	0.220681	-0.212386	-0.250421	-0.124494	-0.118286	0.174212	0.166722	0.363427	-0.230713	-0.109104	0.360632	-0.389329	-0.375913	0.296056	0.106949	-0.19761	-0.402635	-0.306845	-0.390713	-0.409314	-0.332425	0.204074	-0.0796048	0.18033	0.269327	0.0307393	0.118176	-0.130013	-0.135075	0.198987	-0.465491	0.184546	0.484077	0.164955	0.279863
TCGA.XF.AAN2	-0.00382733	0.326259	-0.0963161	0.079683	-0.395874	-0.138541	0.0102031	-0.0896884	-0.144741	-0.127991	0.134702	-0.0782339	0.0447151	0.216782	-0.18075	-0.264694	0.206386	0.294436	-0.0635707	0.236619	0.262169	0.194532	0.289429	0.0345429	-0.17029	-0.138449	0.11196	0.173216	-0.352931	0.335109	0.226804	0.182944	-0.399143	-0.292689	-0.354755	0.113773	0.243429	0.268721	0.0342605	0.0721439	0.414107	-0.449351	-0.261573	0.0898594	-0.529089	0.262965	0.138671	0.0405016	0.283163
TCGA.XF.AAN3	-0.257484	-0.304659	0.204841	-0.181016	0.129203	-0.0125843	-0.383478	0.112261	0.0308635	0.291611	0.260661	0.0501818	-0.233242	0.475722	0.0596358	0.125438	-0.256236	0.0408363	-0.153293	-0.45852	0.135991	0.176663	-0.111689	-0.101705	0.286625	-0.0630375	-0.0142101	0.315651	-0.331412	0.175762	-0.13074	-0.343157	0.205605	0.306657	0.204548	0.435927	-0.431866	0.395691	0.285838	0.305557	0.43693	0.301285	-0.29053	-0.340713	-0.440759	0.400249	0.038614	-0.230814	-0.268388
TCGA.XF.AAN4	-0.553916	-0.732976	0.0760623	-0.299932	0.192746	-0.141506	-0.619628	-0.203668	0.0388984	0.177976	0.0751159	0.0616645	-0.421491	-0.0135801	0.235457	0.23077	-0.43572	0.330502	-0.524327	-0.500064	-0.186977	-0.437816	-0.0820185	-0.349463	0.159421	0.324867	0.0989914	0.159455	-0.200663	0.232839	0.0101227	0.434106	0.541515	0.363116	0.517819	-0.0748033	-0.258621	-0.264029	-0.276646	-0.375124	-0.0311911	-0.0499047	-0.288921	-0.706798	0.0880625	-0.0383674	-0.357562	-0.0595202	-0.193788
TCGA.XF.AAN5	-0.316342	-0.434777	0.176067	-0.251317	-0.00850479	-0.159733	-0.0520579	-0.0108313	-0.0459932	-0.0208609	-0.230151	-0.155283	-0.0943002	-0.144344	-0.0299371	-0.0338205	0.230798	0.16874	-0.159712	0.327383	0.459215	0.446262	0.0270007	-0.0960309	-0.201766	-0.00772763	-0.450443	0.0546022	-0.274394	0.349711	0.0723319	0.42279	-0.138045	-0.130205	-0.146233	0.199336	-0.101549	0.390649	0.149413	0.0322342	0.379294	0.299403	-0.172767	-0.0975981	-0.624317	0.106286	0.0980163	0.155655	0.388568
TCGA.XF.AAN7	0.189951	-0.236645	0.0414104	0.15112	0.588105	-0.15944	-0.160161	-0.136208	-0.0823596	-0.235542	-0.190889	-0.0939867	-0.323416	-0.321653	-0.167478	0.0800035	-0.162379	-0.297332	0.0471467	0.1279	0.401464	0.0743517	0.0136518	-0.257446	0.0863295	-0.0391969	-0.0796336	-0.0134341	-0.125416	0.0696354	0.0706692	-0.465345	0.0105785	0.0305606	0.0913216	-0.270473	0.0999743	-0.0163787	-0.337156	-0.4102	-0.333947	-0.453694	-0.117164	-0.450927	-0.113405	-0.222274	0.0732046	0.185602	0.257758
TCGA.XF.AAN8	-0.593621	-0.249783	0.309767	0.090392	0.131894	0.0372127	-0.66627	0.00127138	0.300269	0.467244	0.48681	0.306909	-0.0450499	0.202447	0.263603	0.177202	-0.420667	0.248297	-0.22856	-0.688499	-0.350777	-0.639216	-0.392579	-0.236607	0.130902	0.438672	0.156901	0.374727	0.017065	0.0369746	0.368326	0.277522	0.374878	0.235267	0.388218	-0.163122	-0.693005	-0.30586	0.466638	-0.148281	-0.0244843	0.39504	-0.273012	-0.669305	0.124243	0.43384	-0.522881	-0.186876	-0.44835
TCGA.YC.A89H	0.0580973	-0.125469	-0.142503	-0.465385	-0.116534	-0.087095	0.192342	0.306761	0.347133	0.189164	0.427934	0.524074	-0.0864236	-0.0457449	-0.190796	-0.169751	-0.00902363	-0.337412	0.122451	0.444256	0.20341	0.180837	-0.331865	0.0310878	0.413848	-0.355323	-0.428721	-0.0878878	0.0314657	0.218223	0.212033	-0.471481	-0.0725453	-0.0710875	-0.0237715	0.310192	0.347826	0.341979	0.0635197	0.466867	0.450748	-0.209726	0.0577746	0.436155	-0.575659	0.175034	0.533479	0.0524976	0.276542
TCGA.YC.A8S6	-0.050343	-0.260735	-0.0345143	-0.169605	0.189132	0.0851326	-0.368403	0.218513	0.33109	0.274577	0.245911	0.107771	-0.0209432	-0.0682838	0.188159	0.159453	-0.236403	-0.10556	-0.314284	-0.199426	0.0869032	-0.297406	0.0688419	-0.134746	0.344731	0.261967	0.185096	-0.266525	0.129603	0.399251	-0.340069	-0.132886	0.325731	0.272535	0.312473	-0.361742	-0.118034	-0.13355	-0.0168886	-0.057715	-0.0142729	-0.0324527	-0.250985	-0.284034	-0.31696	0.143228	0.36968	-0.0152186	0.0104504
TCGA.YC.A9TC	-0.177375	-0.46326	-0.43647	-0.0280309	-0.0718755	0.177124	-0.136388	-0.00724184	-0.0736304	0.0728565	-0.0176643	-0.0636646	-0.340539	0.0417813	-0.0827183	-0.481937	0.0841873	-0.00292158	0.146174	0.632539	0.0842018	0.632047	-0.105454	-0.362121	0.361009	-0.189318	-0.550357	0.560654	0.192977	0.147248	0.0305908	-0.367753	-0.379353	-0.460512	-0.312881	0.378799	0.575299	0.444634	-0.0583616	0.319045	0.275673	0.0312809	0.199001	0.166611	-0.418582	0.097771	0.632004	0.276106	0.385513
TCGA.YF.AA3L	0.152739	0.347299	-0.376694	0.0742469	0.118953	0.134562	0.348058	0.319142	0.196868	0.363387	0.348181	0.479615	-0.0860361	0.197071	0.0539921	-0.107833	-0.0480635	-0.0162471	0.197843	-0.244902	-0.157247	-0.156949	0.0295871	0.152214	0.319055	-0.0889087	-0.506022	-0.115263	-0.0922635	-0.3362	-0.353041	-0.36704	-0.26486	-0.389965	-0.269551	-0.0872065	-0.00326011	-0.00163162	0.217294	0.046025	0.157069	-0.144696	0.0833781	0.034467	-0.278185	0.355527	0.529175	0.117791	0.322726
TCGA.YF.AA3M	0.175612	-0.556182	0.0521687	-0.417351	0.201073	0.132878	0.0747768	0.310921	0.0513434	0.20605	0.358585	0.531574	-0.220237	0.398703	0.0304734	-0.139154	0.154628	0.0510087	0.370399	0.0872683	0.0377416	0.0723741	-0.438951	-0.410147	0.248976	-0.0513023	0.230642	0.182807	-0.183213	0.095939	0.107731	-0.21915	-0.0842065	-0.0284245	-0.11708	0.198817	0.386924	0.475007	0.0787498	-0.0618268	0.194416	0.0698518	-0.0291586	0.22373	-0.423583	0.34978	0.247923	0.111057	0.255982
TCGA.ZF.A9R0	-0.280323	-0.105691	-0.102178	-0.200485	0.163732	0.00456978	0.0557624	0.315491	0.176875	0.282359	0.394299	0.476917	-0.181898	0.331381	0.242762	-0.184383	-0.0836633	-0.0724314	0.0252674	-0.529989	-0.385037	-0.151266	-0.177037	-0.231723	0.243406	-0.31602	-0.15346	0.223682	-0.114771	-0.154642	0.280751	-0.127181	0.0375992	-0.00615858	0.107249	0.0239225	-0.285216	0.14126	0.308752	0.292436	0.252492	-0.0142222	-0.0133154	0.136685	-0.293413	0.345408	-0.248823	0.000309216	0.0132165
TCGA.ZF.A9R1	0.262715	-0.276168	-0.117373	-0.143017	0.0979172	-2.52885e-05	0.496191	0.326716	0.19443	0.0826571	0.132198	0.449358	-0.242358	-0.137177	-0.128839	-0.318569	-0.265086	-0.317273	0.00669501	0.12441	0.333565	0.314008	-0.109377	0.0368159	0.175698	-0.407954	0.0424041	0.0752829	-0.104077	0.0556223	-0.18547	-0.431227	0.0441722	-0.0210027	-0.0341844	0.0570888	0.171112	0.509027	0.176511	0.239599	0.341571	-0.033891	-0.17672	0.555422	-0.558326	0.0663371	0.0411384	0.0210303	0.350831
TCGA.ZF.A9R2	0.144394	0.212114	-0.0773906	-0.463919	0.0325239	-0.0994843	0.425	0.215103	0.211094	0.0093019	0.289915	0.39695	-0.1704	0.0185952	-0.111263	-0.471181	-0.383676	-0.424355	0.0459993	0.427631	0.419728	0.397653	-0.169906	-0.0453427	0.0578561	-0.539957	-0.336169	-0.0447747	-0.215678	0.120013	-0.175824	-0.580671	-0.362669	-0.321578	-0.383756	0.0629203	0.102715	0.104059	-0.0606547	0.170309	0.208158	-0.186472	-0.0405952	0.344051	-0.438263	0.0578825	0.29817	-0.0623694	0.237671
TCGA.ZF.A9R3	0.318923	0.597006	-0.15466	0.170552	-0.102653	-0.14481	0.39257	0.16805	-0.119797	-0.0747488	-0.0790438	0.02401	0.0918363	-0.201417	0.293256	-0.0559016	-0.143612	0.0459469	0.0942312	0.330588	0.259793	0.405999	0.0785082	0.380789	-0.207909	-0.286433	-0.150311	-0.278456	-0.254474	-0.159248	-0.333289	-0.184566	-0.43144	-0.395016	-0.446852	0.0950294	0.260853	0.149929	0.36778	0.25466	0.446265	-0.180903	0.129269	0.354063	-0.338848	0.163532	0.360696	-0.0296634	0.211825
TCGA.ZF.A9R4	0.434965	0.0549579	0.0294359	-0.489869	0.488517	-0.0742088	0.449343	0.196963	0.195938	-0.0576186	0.0479032	0.252919	-0.0683068	-0.0884976	-0.292096	-0.12039	-0.0419513	-0.0111073	0.128602	0.3248	0.126493	0.340535	-0.0564718	-0.219224	-0.0462792	-0.449025	-0.374928	0.0680635	-0.22557	0.0619459	-0.231441	-0.189395	-0.36775	-0.355758	-0.35285	0.0062108	-0.0231885	-0.00788274	0.171854	0.083393	-0.0434046	0.0441511	0.0597534	-0.132803	-0.41613	0.0252204	0.13673	-0.142423	0.124434
TCGA.ZF.A9R5	0.114269	0.287044	-0.282118	-0.254351	-0.270499	-0.130086	0.375277	0.136819	-0.0141846	-0.149694	0.101337	0.0329554	-0.169205	-0.485106	-0.543982	-0.412928	-0.0733772	0.0582123	-0.311616	0.335163	0.165346	0.551225	-0.0113248	-0.168914	0.0848108	-0.562241	-0.0818306	0.0802174	-0.26195	-0.432621	-0.0519396	-0.126515	-0.421102	-0.473566	-0.414989	-0.170963	-0.0224053	-0.0752755	0.118506	-0.0771729	-0.203087	0.0626395	-0.075969	-0.578589	-0.488682	0.0822227	0.303353	-0.0924	0.0788479
TCGA.ZF.A9R7	-0.294363	0.015156	-0.455825	-0.428759	-0.296708	-0.120137	-0.0860892	0.129414	-0.0106249	-0.0319369	0.0823719	0.299767	-0.220819	-0.160262	0.0252703	-0.268659	-0.191589	-0.0762355	-0.152155	-0.244476	-0.10767	0.014049	0.24199	-0.213005	-0.178734	-0.412954	-0.15688	0.0881798	-0.43748	-0.0581449	0.315205	0.676598	-0.347524	-0.400456	-0.366966	-0.294718	-0.490171	-0.30466	-0.0791957	0.0391775	-0.0559673	-0.372573	-0.38946	-0.416866	-0.47524	0.0527915	-0.208993	-0.332292	-0.0739761
TCGA.ZF.A9R9	-0.418099	-0.0562753	-0.374622	-0.0678235	-0.175543	0.0107455	-0.234039	0.242471	0.174561	0.388414	0.495973	0.574675	-0.297403	0.158149	-0.148831	-0.220522	-0.294474	-0.158925	-0.17397	-0.496158	-0.167464	-0.0421081	0.223669	-0.276981	0.232617	-0.15791	-0.462263	-0.109459	-0.214124	-0.280394	0.397322	-0.214568	0.242628	0.201858	0.23324	-0.185162	-0.582189	-0.196291	0.37919	-0.114604	-0.206026	0.212571	0.0619155	-0.0665091	-0.0951754	0.432015	0.090017	-0.183304	-0.130939
TCGA.ZF.A9RC	-0.155967	-0.317428	-0.0918927	-0.0983649	0.4828	0.232264	-0.0413325	0.372742	0.181162	0.383631	0.409341	0.555866	-0.323185	0.361191	0.0955471	-0.122532	-0.258854	-0.247891	0.0554107	-0.310876	-0.263598	-0.406674	-0.191983	-0.332436	0.290133	-0.134827	-0.31803	0.164248	-0.135277	0.0906418	-0.290447	-0.495628	0.214537	0.125456	0.301948	-0.212291	-0.492192	-0.0668925	0.226337	-0.0797918	0.0560709	0.0189935	-0.290031	-0.183016	-0.467583	0.267019	-0.051509	-0.103086	-0.0390474
TCGA.ZF.A9RD	-0.347383	-0.483618	-0.0226999	-0.196611	-0.104975	-0.12181	-0.279681	-0.104638	-0.0363316	0.299816	0.21713	0.165875	-0.306722	0.316847	0.00165209	-0.126721	-0.14158	-0.0695734	-0.137197	-0.106653	0.0709524	-0.0399685	0.29659	-0.208893	0.360007	0.335722	-0.558036	-0.218082	-0.127859	0.431981	0.378386	0.657656	0.102741	0.0345992	0.0393625	0.328662	0.299214	0.365862	0.176574	0.175257	0.0304857	0.222001	-0.273932	-0.116161	-0.348619	0.34248	0.535066	0.0677372	0.250395
TCGA.ZF.A9RE	-0.214333	-0.437617	-0.169432	-0.538001	-0.368666	-0.00247049	-0.108389	-0.00990541	-0.185856	0.0294224	0.39503	0.230446	-0.17469	0.234392	-0.254258	-0.50447	-0.133558	-0.111885	0.229561	0.38707	0.365694	-0.00976543	-0.259663	-0.445422	0.237947	-0.274061	0.0503954	0.0287886	0.0692101	-0.092371	-0.268166	-0.476648	-0.264028	-0.196962	-0.311686	0.406519	0.479951	0.403858	0.103325	0.364217	0.378893	0.0102275	-0.0575113	0.32226	-0.512219	0.276002	0.266914	-0.0972545	0.107982
TCGA.ZF.A9RF	0.196288	0.471842	-0.361925	0.214812	-0.279724	0.0140732	0.282479	-0.157713	-0.310925	-0.326055	-0.459614	-0.319671	0.274772	-0.512728	-0.00391629	0.116008	0.139776	-0.110146	0.170999	0.40219	0.270522	0.509243	0.381884	0.143567	-0.213086	-0.356973	-0.388975	-0.281532	-0.343882	0.232032	0.0763184	0.410593	-0.264407	-0.398326	-0.27216	0.157559	0.143393	0.378231	-0.19734	0.0649879	0.424926	-0.306885	-0.107388	0.0109019	-0.243917	-0.25265	0.266263	0.10546	0.348104
TCGA.ZF.A9RL	0.386797	0.266305	-0.23556	-0.350751	-0.306767	0.19807	0.405352	0.326226	0.0669454	-0.0420374	0.266624	0.401565	-0.0588911	-0.493929	-0.0985988	-0.368826	-0.283758	-0.0384662	-0.18502	0.260973	0.355502	0.478108	0.00859759	-0.0753984	-0.145957	-0.582176	-0.146479	0.0250508	-0.349601	0.181419	-0.382327	-0.554518	-0.478809	-0.43117	-0.489917	0.134985	0.213484	0.279911	0.300569	0.134147	-0.0291252	0.329208	0.245546	0.465702	-0.383578	0.103155	0.235471	-0.136901	0.0949069
TCGA.ZF.A9RM	0.467518	0.0809445	-0.213174	-0.213351	-0.210824	-0.0918981	0.509403	0.0212585	-0.0626341	-0.232114	-0.14092	-0.0119578	-0.0951015	-0.0842346	0.103657	-0.242476	0.0300017	-0.180009	-0.147245	0.460214	0.195699	0.507737	0.0179079	-0.0527513	-0.280478	-0.602259	-0.358299	0.0521606	-0.174871	0.154029	-0.510698	-0.461816	-0.44403	-0.420284	-0.398451	0.0610808	0.401809	0.231189	-0.0686374	0.283374	0.175784	-0.362936	0.0806135	0.470497	-0.52502	-0.158801	-0.102762	-0.0576222	0.221232
TCGA.ZF.A9RN	-0.15458	0.309217	-0.229094	-0.0948312	0.276264	0.0590778	0.229623	0.0963268	0.021917	-0.293167	-0.0746474	0.154813	-0.21236	0.112702	0.124283	0.131303	-0.147955	-0.464052	0.0461359	0.484132	0.419415	0.468712	0.250355	-0.160365	-0.0974188	-0.339728	-0.698476	-0.141887	-0.417692	0.333694	0.0576407	0.253623	-0.340465	-0.319762	-0.328633	-0.0193119	0.203514	0.110048	-0.29741	-0.196592	0.100882	-0.114372	0.0180096	0.151632	-0.0858487	-0.360745	0.393624	0.19259	0.361422
TCGA.ZF.AA4N	0.0105518	-0.46986	-0.043129	-0.110143	0.252415	0.0895332	-0.180763	0.140863	-0.0911926	-0.0645888	0.00529556	-0.224925	-0.280497	-0.0571168	0.243542	0.0988734	-0.520647	0.0754688	-0.239518	-0.0245296	0.310439	-0.179448	-0.282362	-0.298692	-0.138379	0.0909831	-0.39743	0.245202	-0.28627	0.158789	0.0059078	-0.0702773	0.0396611	0.00821897	0.0656829	0.285477	-0.123509	0.411358	0.220709	0.223396	0.373447	0.279795	-0.321719	0.18566	-0.371521	0.18949	-0.298996	0.126512	0.260688
TCGA.ZF.AA4R	-0.221462	-0.380158	-0.0800052	-0.196657	0.117395	0.0086406	-0.186617	-0.0973853	0.00137048	-0.165704	0.0387226	0.26907	-0.183636	0.427698	-0.0987305	-0.24129	0.186638	-0.117285	-0.172981	-0.365432	0.0432047	-0.35328	-0.342216	-0.327671	-0.180073	-0.507043	-0.45143	0.103943	-0.287142	0.225821	0.0916023	-0.435887	0.116986	0.163235	0.126238	-0.139125	-0.283075	-0.160954	0.218278	-0.348421	-0.237923	0.177826	0.0042794	0.248889	-0.326895	0.233526	-0.404456	-0.0890479	0.0614293
TCGA.ZF.AA4T	0.2866	-0.248292	-0.258904	-0.295004	0.132029	0.0273945	0.286605	0.0570026	-0.121969	-0.244697	-0.176303	0.125277	-0.321573	0.0584004	-0.203537	-0.472861	0.353104	-0.300999	0.0105336	0.315004	0.374135	0.419302	0.0313015	-0.268982	0.0881833	-0.405275	-0.174986	-0.331606	-0.0153349	6.1091e-05	-0.376233	-0.257764	-0.364632	-0.379203	-0.378334	0.0399853	0.266037	0.191897	0.422329	-0.0721387	0.159881	-0.0678838	0.0395175	-0.00370313	-0.635624	-0.00409371	0.298137	0.0353512	0.265364
TCGA.ZF.AA4U	-0.024762	-0.0420616	-0.150592	-0.110598	0.0525829	-0.0367722	0.37073	0.212157	0.147124	0.123626	0.384171	0.256192	-0.366001	0.0864294	-0.137734	-0.253234	-0.261614	-0.164919	-0.0228131	0.244719	0.262184	0.195914	-0.0805785	-0.145281	0.301213	-0.465145	-0.177848	-0.184409	0.0156015	0.123609	-0.203448	-0.441892	-0.21506	-0.237272	-0.20974	0.268757	0.340281	0.496137	0.43842	0.280863	0.485179	-0.0185527	-0.0740565	0.29338	-0.319959	0.359548	0.412281	0.0605526	0.209174
TCGA.ZF.AA4V	-0.049227	-0.393281	-0.181609	-0.470816	-0.00933371	-0.0278574	-0.143666	0.0628632	-0.125878	-0.112695	0.0571269	0.142076	-0.274187	0.343801	-0.407994	-0.53204	0.132342	0.177142	0.228173	0.307234	0.0675293	-0.276537	-0.0769093	-0.305852	0.205978	-0.127185	-0.309113	0.132822	-0.120752	0.310505	0.407429	0.247277	-0.0500917	-0.101344	-0.043719	0.0747952	-0.0162167	0.275584	0.0230883	-0.0870153	0.335161	-0.323725	-0.270987	-0.0604937	-0.313849	0.217929	0.329099	0.21602	0.358447
TCGA.ZF.AA4W	-0.381022	-0.510755	0.139997	-0.469498	-0.115093	-0.184813	-0.388943	-0.0987228	-0.0238068	-0.00528038	0.133936	-0.238554	-0.270949	0.311286	-0.167357	-0.154524	-0.354517	-0.0362875	0.232206	-0.0602416	-0.0876728	-0.448811	-0.322162	-0.400422	0.342993	0.0619688	0.0174078	-0.100135	0.00252494	0.0235916	0.377649	-0.122258	-0.120556	-0.0884352	-0.117493	-0.131819	-0.246982	-0.0872657	-0.163216	-0.204499	-0.171134	-0.25285	-0.428109	0.133909	-0.254502	0.348747	0.395621	0.172102	0.382422
TCGA.ZF.AA4X	0.427874	0.364782	-0.168425	0.132752	-0.143928	-0.00906194	0.587396	0.0990125	-0.0861393	-0.203923	-0.106716	-0.0929997	-0.0222977	-0.0142793	0.0229005	-0.42123	-0.0609035	-0.14424	0.0738514	0.28168	0.352588	0.507358	0.441393	0.150518	-0.268723	-0.5543	-0.290328	-0.00852469	-0.27612	0.0631933	-0.415094	-0.44798	-0.408196	-0.412319	-0.396393	0.0605279	0.283968	0.138137	0.222004	0.00304374	-0.00960285	-0.261234	0.0508293	0.369503	-0.397433	0.0424646	0.135582	-0.0287467	0.354193
TCGA.ZF.AA51	0.0413675	0.0510696	-0.142821	0.0622492	0.415679	-0.0383607	-0.104481	0.176606	0.0943216	0.174097	0.0585974	0.25476	-0.310134	0.126729	0.388465	-0.0219674	-0.04175	-0.146698	-0.184206	0.0526216	-0.0806336	-0.290458	-0.023941	-0.0871357	0.29768	-0.46956	-0.27432	-0.15843	0.153597	0.335817	0.152675	0.446068	-0.00808816	-0.0731675	-0.0136045	-0.180706	-0.090582	0.144268	0.349087	0.07486	0.297334	0.014293	-0.140094	-0.407861	-0.270547	0.286842	0.238998	0.0390384	0.171148
TCGA.ZF.AA52	-0.0967783	0.267636	-0.191783	0.300872	0.121849	-0.0054758	0.122841	0.234377	0.0575493	0.297996	-0.0345792	0.10383	-0.198416	0.394082	0.452742	0.331658	-0.276827	0.166983	0.126665	-0.343215	-0.26347	-0.257472	0.14044	0.166217	0.279914	-0.0158843	-0.52904	-0.257151	-0.41197	0.219309	-0.0850002	-0.229232	0.164644	-0.0113842	0.156941	-0.104406	-0.282481	0.0230267	0.100703	0.0749681	0.20981	-0.40361	-0.215938	-0.132661	-0.466368	-0.0467682	0.358146	0.0585114	0.178556
TCGA.ZF.AA53	0.00649093	0.467588	0.102406	0.42403	0.302586	-0.134334	0.0458284	-0.0986334	-0.167755	0.227903	-0.00839963	-0.175327	-0.100386	0.319913	0.310367	0.487832	0.0710062	0.226687	0.0101766	-0.0903962	-0.158374	-0.314184	0.204487	0.380967	0.320583	0.339714	-0.447841	-0.236464	-0.403326	0.343107	0.50378	0.393144	0.266402	0.227807	0.196241	0.252555	-0.028194	0.177815	0.251924	0.266046	0.610248	0.243632	-0.0727394	0.258196	-0.424349	0.294098	0.412361	0.0639483	0.326417
TCGA.ZF.AA54	0.260885	0.392346	-0.280314	0.526761	0.382217	-0.179871	-0.0425052	-0.152788	-0.444948	-0.396843	-0.536502	-0.595769	-0.239475	-0.104493	0.0957168	0.359416	0.236855	-0.209142	0.454638	0.512956	0.399906	0.16782	0.101825	0.283447	0.294233	0.369561	-0.0474136	0.0077165	-0.31345	0.275024	0.192366	0.231597	0.226089	0.0578604	0.196719	0.0338584	-0.00689808	-0.144325	-0.248228	-0.104687	0.326863	-0.429276	-0.444587	-0.656815	-0.293213	-0.317804	0.240153	0.168815	0.344484
TCGA.ZF.AA56	0.26759	0.158971	0.28003	0.137197	0.304162	0.0369522	0.2087	0.16166	0.234939	0.30169	0.13791	0.23938	-0.0107659	0.189433	0.450202	0.380836	-0.288867	0.134349	0.161383	0.283981	0.341318	0.256112	-0.055565	0.172682	-0.0129149	0.315379	-0.272723	-0.34692	-0.165631	0.389475	-0.0481157	0.355035	-0.0753032	-0.0342839	-0.0869843	0.332067	0.0729233	0.51641	0.288068	0.452753	0.517314	0.22852	-0.0334294	0.466302	-0.46374	0.450316	0.200013	0.0178891	0.258154
TCGA.ZF.AA58	-0.152058	-0.107026	-0.34485	0.401157	0.334178	-0.179707	-0.279353	-0.137104	-0.307196	-0.124727	-0.352676	-0.304143	-0.332042	-0.129834	0.14239	-0.0712567	-0.11118	0.0784278	-0.131646	0.147706	0.0970166	0.479557	0.319166	0.315765	0.140245	-0.228415	-0.432625	-0.363778	-0.431618	0.247992	0.525656	0.586654	0.274789	0.15616	0.269302	0.00416624	-0.247697	0.151989	-0.282493	-0.20297	0.320619	-0.332597	-0.396218	-0.479728	-0.614023	-0.395313	0.221548	0.120038	0.360497
TCGA.ZF.AA5H	-0.0174778	0.411072	0.0595045	0.424606	0.314082	-0.171416	0.136003	0.0520259	-0.0335017	-0.195316	-0.171368	-0.182513	-0.036762	0.213896	-0.00764898	0.105856	0.119803	0.00316661	0.181327	0.0220659	0.11786	0.596144	0.250747	0.269514	-0.299597	-0.0624764	-0.245578	-0.146409	-0.428286	0.298379	0.346293	0.367614	0.0630828	0.121201	-0.0172218	0.0598316	-0.443807	0.0792808	-0.068265	-0.00222672	0.330999	-0.477432	-0.453708	-0.188384	-0.521669	-0.0284177	-0.361583	0.0544382	0.409766
TCGA.ZF.AA5N	0.0294648	-0.241708	0.00305061	-0.252256	-0.337083	0.0404797	-0.213338	0.261713	0.268563	0.258556	0.460528	0.338864	-0.0114214	0.19789	-0.330302	-0.496069	-0.0693492	-0.119064	-0.0416052	-0.0677037	-0.416186	-0.318654	-0.537842	-0.282531	0.371157	0.257008	-0.594624	0.256951	-0.235573	0.0738392	-0.122455	-0.126592	0.103564	0.0613689	0.184866	-0.0189427	-0.35294	0.10527	0.392011	0.14323	0.132383	0.144608	-0.170089	-0.0172806	1.57792e-05	0.559361	-0.100399	0.0951373	0.113598
TCGA.ZF.AA5P	-0.474655	-0.347047	-0.0470193	-0.0915287	0.368567	0.135428	-0.489686	0.0656397	-0.0192369	0.3155	0.220567	0.361973	-0.326944	0.340852	0.00935596	0.118566	-0.247855	0.0872283	-0.431177	-0.484098	-0.250443	-0.535454	-0.314106	-0.394329	0.335748	0.0402193	0.102357	-0.0751305	0.188578	0.229833	0.440968	0.15709	0.501714	0.313167	0.457627	-0.0226774	-0.275236	-0.0501492	0.0702867	-0.161555	-0.0126509	0.0634945	-0.105397	-0.574941	-0.0885927	0.214591	-0.223841	-0.0589724	-0.199698
TCGA.3C.AAAU	0.33203	0.254456	-0.333732	0.160125	-0.159064	0.0230444	0.523536	-0.109718	-0.437697	-0.511987	-0.528014	-0.381992	-0.0812895	-0.537113	-0.348956	-0.20767	0.00856426	-0.221949	-0.297578	0.422899	0.251982	0.430561	0.132976	0.149143	-0.15659	-0.159614	0.10866	0.334873	-0.386579	-0.279921	0.106977	-0.492762	-0.108685	-0.151255	-0.0745292	-0.37415	-0.271176	-0.198029	-0.489214	-0.0345051	-0.234638	-0.604741	-0.275409	-0.0984434	-0.132233	-0.516425	-0.0494654	-0.183128	0.0264363
TCGA.3C.AALI	-0.110946	0.235354	-0.353704	-0.122785	-0.303013	-0.0436474	-0.0440562	-0.0457064	-0.438272	-0.326484	-0.398873	-0.297235	-0.0920586	-0.380639	-0.354626	0.0456614	-0.0565073	-0.441418	-0.219809	-0.211689	0.080428	-0.297513	0.120847	0.0796413	0.053518	-0.353312	0.363753	0.202433	-0.41562	0.135333	0.511698	0.295109	0.00928334	-0.133979	-0.0438665	-0.145786	-0.0709164	-0.144612	-0.426214	0.0146708	-0.260348	-0.444651	-0.385893	0.157534	-0.327592	-0.284511	0.1367	-0.0331791	0.0948789
TCGA.3C.AALJ	0.0887357	-0.274934	-0.38156	-0.124307	0.305704	-0.200112	-0.0162488	-0.0253454	-0.389165	-0.361813	-0.444738	-0.44103	-0.353373	-0.513853	-0.028264	-0.0829949	0.105051	-0.00198201	-0.374837	0.0790548	0.281414	-0.443996	0.253631	-0.0410838	0.119156	-0.426563	-0.192568	-0.042798	-0.512273	0.288619	0.366581	0.186208	-0.136193	-0.185878	-0.081575	-0.396263	-0.329434	-0.258203	-0.40608	0.17932	-0.1578	-0.508481	-0.333776	-0.1854	-0.190852	-0.420317	0.247728	-0.0371534	0.211435
TCGA.3C.AALK	-0.173954	-0.364764	-0.0991551	0.101083	0.0373699	-0.190362	-0.178729	-0.179557	-0.323639	0.0296602	-0.145894	-0.000784381	0.010726	-0.346853	-0.0127344	-0.374219	-0.0232419	-0.156888	-0.223284	-0.460618	-0.178226	-0.351045	-0.429	-0.204876	0.0486667	0.259033	0.426507	0.129358	-0.123145	0.13965	-0.0371141	-0.21436	0.313721	0.317554	0.357116	-0.507582	-0.596707	-0.476696	0.115209	-0.487418	-0.364356	0.202909	-0.325283	0.0993868	-0.155902	0.232175	-0.355098	-0.181128	-0.193751
TCGA.4H.AAAK	-0.415684	-0.554003	-0.0989064	-0.370678	-0.00279663	-0.35389	-0.362936	-0.330163	-0.299711	0.0403199	0.0898743	0.220117	-0.349482	-0.338881	-0.173041	-0.322501	-0.270844	-0.215909	0.293892	-0.323716	-0.25855	0.0826233	-0.173027	-0.375799	-0.237324	-0.0250586	0.541205	0.172582	-0.430149	-0.391472	-0.376838	-0.286722	0.157693	0.218699	0.263201	-0.363136	-0.65306	-0.458226	-0.269529	-0.38359	-0.385941	0.160491	-0.2965	-0.543236	-0.0888906	-0.137344	-0.599093	-0.15748	-0.252173
TCGA.5L.AAT0	0.0330264	-0.224659	-0.266568	-0.261561	0.140497	-0.324659	0.0143113	-0.143616	-0.218213	-0.22473	-0.378689	-0.156239	-0.291801	-0.364301	0.0826336	-0.366116	-0.270598	-0.31641	0.0283372	-0.0751602	0.0129213	0.149888	0.236012	-0.00935693	-0.159095	-0.231653	-0.201296	-0.279629	-0.531815	-0.0369873	-0.15915	0.320742	0.00151387	-0.0622479	0.0465208	-0.494563	-0.556148	-0.535494	-0.464074	-0.506188	-0.349931	-0.440793	-0.314677	-0.460355	-0.360415	-0.460967	-0.175716	-0.117087	-0.2097
TCGA.5L.AAT1	-0.223559	0.395437	-0.254466	-0.144477	-0.17571	-0.357845	-0.42536	-0.246486	-0.215482	-0.0379111	-0.34741	-0.11622	-0.0840452	-0.37352	0.081913	0.135781	0.116792	-0.161561	0.301812	-0.00627839	-0.0736421	-0.255308	0.478116	0.192317	-0.0530713	-0.260327	-0.512215	-0.180191	-0.26293	0.0386112	0.201993	0.560742	-0.220781	-0.275864	-0.168488	-0.269043	-0.195291	-0.328213	-0.350171	-0.269771	-0.313084	-0.32618	-0.17285	-0.534669	-0.0366862	-0.314297	0.223727	-0.103829	-0.188188
TCGA.5T.A9QA	0.257983	0.507003	-0.354079	-0.107671	-0.104855	-0.208817	0.370681	-0.0770398	-0.246364	-0.38679	-0.37012	-0.180664	0.000524231	-0.413582	0.0913192	-0.258967	0.409592	-0.112261	0.235007	0.611465	0.241476	0.509744	0.383612	0.138748	0.0439434	-0.348184	0.0995956	-0.149779	0.0672817	-0.0524105	0.157782	-0.493601	-0.266781	-0.307387	-0.269589	-0.0459645	0.303549	-0.0734722	-0.180901	0.280509	-0.0188339	-0.0903526	0.206133	0.413982	-0.446579	-0.278401	0.427124	0.133553	0.406604
TCGA.A1.A0SB	-0.273836	-0.53382	-0.0992597	-0.393623	-0.0476967	-0.279062	-0.281891	-0.293461	-0.120699	-0.356061	-0.480007	-0.37429	-0.26144	0.128613	-0.134374	-0.335779	-0.321238	-0.463926	-0.478891	0.159587	0.193236	0.466389	-0.353629	-0.398771	-0.288097	-0.335355	0.377517	0.305475	-0.253392	-0.179418	-0.60447	-0.673953	-0.00350949	0.253112	0.0524093	-0.353977	-0.321314	-0.458076	-0.291479	-0.449081	-0.176602	-0.218412	-0.163985	-0.653729	-0.195784	-0.40919	-0.570402	-0.190509	-0.276631
TCGA.A1.A0SD	-0.0918075	-0.0871815	-0.0203902	-0.277942	0.206927	-0.229246	0.315544	-0.123515	-0.273795	-0.368649	-0.437394	-0.225901	0.120154	-0.386774	0.216992	0.445724	0.207509	-0.130853	-0.189379	-0.357759	0.098778	-0.148265	-0.129587	-0.0284058	-0.069512	0.21686	0.27238	0.202119	-0.267745	0.0238089	-0.215746	-0.420728	0.343046	0.436328	0.372715	-0.348878	-0.4274	-0.430887	-0.32028	-0.409615	-0.422258	-0.287212	-0.154956	-0.0520123	-0.219315	-0.284789	-0.429847	-0.127009	-0.391376
TCGA.A1.A0SE	0.213859	-0.0900195	0.0395879	-0.135191	0.0841598	-0.261932	0.314	-0.190874	-0.311554	-0.426273	-0.52647	-0.415151	-0.103509	-0.431292	-0.0749777	-0.00557255	-0.217841	-0.223617	-0.179924	0.117756	0.0105029	0.353923	-0.0482019	-0.10586	-0.134424	0.247382	0.568987	-0.356792	-0.261515	-0.0183285	-0.382858	-0.464354	0.133082	0.301447	0.190409	-0.447431	-0.270352	-0.366234	-0.32503	-0.172482	-0.302827	-0.356189	-0.144728	0.207197	-0.0568091	-0.331615	-0.308311	0.0668014	-0.0398405
TCGA.A1.A0SF	0.245967	-0.0664467	-0.150164	-0.340855	-0.276889	-0.282234	0.184623	-0.14185	-0.134923	-0.319913	-0.436789	-0.138029	-0.319765	-0.497572	-0.109186	-0.102462	0.0173426	-0.19959	-0.0774418	0.252151	0.0175312	0.177038	0.182498	-0.0540022	-0.229775	0.0329056	0.111649	-0.128362	-0.281181	0.0865097	-0.496006	0.119362	-0.0459318	-0.141535	-0.00602951	-0.355054	0.257083	-0.183701	-0.373188	-0.227229	-0.147621	-0.440981	-0.21513	-0.489649	-0.263019	-0.43408	0.0783377	0.0199113	-0.0597432
TCGA.A1.A0SG	0.277276	-0.057325	-0.231328	0.196504	0.0507331	-0.161339	0.390746	-0.0298863	-0.226738	-0.306324	-0.317238	-0.362279	-0.303601	-0.425492	-0.117341	0.214771	-0.247025	-0.385268	0.0685514	-0.22216	-0.0572233	-0.0239128	0.112789	0.117104	-0.119325	0.024809	0.140166	0.103869	-0.324967	-0.0380816	0.371045	-0.159156	-0.0474212	0.065471	0.0520609	-0.151491	-0.105007	-0.252907	-0.150299	-0.2402	-0.299815	0.0324297	-0.0296045	-0.0979706	-0.298393	-0.224268	-0.017162	-0.0792984	-0.238967
TCGA.A1.A0SH	-0.378606	-0.208287	0.469091	0.123272	0.452596	-0.0321949	-0.360523	-0.218803	0.126192	0.215712	0.349936	0.152314	0.0402477	0.205519	-0.0376557	0.142585	-0.162366	-0.278756	-0.0468377	-0.693914	-0.512358	-0.494218	-0.528204	-0.325251	-0.106821	0.322802	-0.125547	0.438639	-0.0157735	-0.269212	0.0499067	-0.0763071	0.381202	0.395719	0.395655	-0.314458	-0.651827	-0.486862	0.481531	-0.366894	-0.105645	0.528504	-0.295031	0.103622	0.335034	0.499265	-0.713593	-0.256979	-0.508848
TCGA.A1.A0SI	-0.227036	-0.561468	0.286821	-0.211487	0.303178	-0.0177221	-0.467465	-0.306996	-0.182135	0.0503962	0.286056	0.186212	-0.0740731	0.183233	0.0414612	-0.0598666	-0.281849	-0.284867	-0.216652	-0.656742	-0.329765	-0.215497	-0.490068	-0.369216	-0.113389	0.440935	-0.180437	0.217309	0.061174	-0.164289	0.341156	0.321774	0.370431	0.361329	0.408199	-0.231469	-0.513887	-0.322876	0.341254	-0.397727	-0.332121	0.32939	-0.288997	-0.186367	0.387633	0.351841	-0.606274	-0.134444	-0.308028
TCGA.A1.A0SJ	0.459158	0.229811	0.0142175	0.203466	-0.246232	0.00610895	0.482557	0.115946	-0.172111	-0.370522	-0.533539	-0.308019	0.0934014	-0.38797	0.201707	0.0287557	-0.0711246	-0.0471076	0.172179	0.362932	0.304472	0.126938	-0.0299089	0.175497	-0.181042	0.132953	0.0854781	-0.0972374	-0.0620827	0.175567	-0.33999	-0.553013	0.0650069	0.248829	0.117686	-0.292317	0.211466	0.00222284	-0.196916	-0.145295	-0.100306	-0.265487	0.00373309	0.513099	-0.225015	-0.26805	0.0979666	-0.0694406	-0.0542219
TCGA.A1.A0SK	-0.159278	-0.702025	-0.185225	-0.535837	0.0510337	-0.154229	-0.265819	-0.240158	-0.312715	-0.46013	-0.432953	-0.379968	-0.393725	-0.0555866	-0.0860796	-0.36785	0.0431919	-0.227595	-0.194411	0.335872	0.362479	0.332327	-0.242677	-0.501066	-0.0703559	-0.423156	-0.0266734	0.461602	-0.133093	-0.0024373	-0.136104	-0.512477	-0.23038	-0.230375	-0.227387	-0.0162503	-0.100593	-0.0458576	-0.364984	-0.294938	-0.378362	-0.365292	-0.241453	-0.366109	-0.473429	-0.448074	-0.280567	0.0620304	0.115049
TCGA.A1.A0SM	-0.010734	0.273267	0.499887	0.272764	0.464469	-0.011948	-0.29408	-0.11661	-0.136483	-0.151322	-0.0250319	0.051313	0.143386	0.0626668	0.256553	0.240625	0.209417	-0.326066	-0.0588244	-0.39213	-0.181315	-0.493204	-0.127215	0.0955202	-0.110388	0.098453	0.548317	0.321727	0.142365	0.175664	-0.262868	-0.484413	0.401644	0.4133	0.409566	-0.251053	-0.485893	-0.445541	0.406769	-0.134337	-0.0363178	0.370357	-0.0348596	0.450659	0.0483104	0.223639	-0.502047	-0.0843094	-0.320493
TCGA.A1.A0SN	0.387438	0.312289	0.313649	0.108086	0.124346	-0.166442	-0.104721	-0.15116	-0.111298	-0.35437	-0.372733	-0.197322	0.331444	-0.119468	0.146983	0.43612	0.246004	-0.21054	-0.0621772	0.0639721	-0.0241669	0.10481	-0.165819	0.124763	-0.139551	0.225471	-0.0178561	-0.103414	-0.0694143	0.166295	0.0428331	0.264034	0.0223207	0.076841	0.0962874	-0.254324	0.233127	-0.0985754	-0.215878	-0.272082	-0.280097	-0.162566	-0.337626	-0.141125	0.154895	-0.326756	-0.390941	0.0546278	-0.0485122
TCGA.A1.A0SO	0.352485	0.147186	-0.236874	-0.377673	-0.275643	-0.132376	0.449931	-0.178277	-0.336197	-0.43267	-0.441621	-0.197609	-0.262459	-0.0158668	-0.262255	-0.189885	0.286702	-0.315619	-0.243954	0.555583	0.556706	0.474315	-0.0530915	-0.12551	-0.372261	-0.459759	-0.316432	-0.421868	-0.381588	-0.0371259	-0.300352	-0.398948	-0.367181	-0.2812	-0.360309	-0.229504	0.214999	-0.0578829	-0.124308	-0.032931	-0.0792381	-0.359634	-0.0543153	-0.0753498	0.0333047	-0.403674	-0.0721174	0.104079	0.236111
TCGA.A1.A0SP	0.0316629	-0.398418	-0.286701	-0.295774	0.00630998	-0.0947021	-0.232253	-0.191741	-0.0490044	-0.310319	-0.471955	-0.247598	-0.275289	-0.00873971	-0.0793589	-0.0979735	0.0338477	-0.251594	-0.0430749	0.511204	0.393221	0.218071	-0.26509	-0.2626	-0.0998632	0.0960991	-0.383845	0.428339	-0.193316	0.265364	-0.200669	-0.0227048	-0.0428227	0.153746	-0.0118476	-0.0552973	0.0642703	0.231021	-0.350969	-0.156892	-0.0158999	-0.347639	-0.300359	-0.195898	-0.365964	-0.406574	0.0112763	0.212748	0.427929
TCGA.A1.A0SQ	0.0266008	0.0515214	0.349347	-0.188533	0.188305	-0.00945576	0.358543	0.020141	-0.0900416	-0.154385	-0.03196	0.261304	-0.070475	-0.20238	-0.218345	0.261524	0.140276	-0.271661	0.0470403	0.116285	-0.178326	-0.0167153	-0.0741955	-0.00781827	0.0970495	0.0424389	0.370777	-0.00958224	0.259385	-0.156773	-0.351697	-0.497063	0.0810334	-0.0057479	0.039328	0.0242519	-0.253624	-0.250781	-0.126858	0.189039	-0.137279	-0.0229991	0.15074	0.547093	-0.0254398	0.0166188	-0.155018	-0.107924	-0.0956837
TCGA.A2.A04N	-0.155606	-0.473157	-0.17363	-0.429212	0.0408215	-0.257654	0.139301	-0.176393	-0.244287	-0.215984	-0.231999	-0.155705	-0.292304	-0.443958	0.0699608	-0.167018	-0.372829	-0.227931	0.0424336	-0.2003	-0.0749908	0.192317	0.0712292	-0.236321	-0.210278	0.0356914	-0.127777	0.0495965	-0.44863	-0.264654	-0.219095	-0.513798	-0.0851403	-0.0134608	-0.00521511	-0.360029	-0.39551	-0.462623	-0.361617	-0.32957	-0.492037	-0.186587	-0.110516	-0.300855	-0.159624	-0.293704	-0.365831	-0.117309	-0.325251
TCGA.A2.A04P	-0.317055	-0.633465	-0.266899	-0.247815	0.239615	-0.00497627	-0.419197	-0.159011	-0.427475	-0.159045	-0.22946	-0.085175	-0.540504	0.327179	-0.258261	-0.382133	-0.0311937	0.214727	-0.130426	-0.252133	-0.137431	-0.447345	0.0449829	-0.406001	0.207912	-0.522172	-0.481932	0.266028	-0.0537483	0.168108	0.521699	0.456416	-0.159349	-0.182658	-0.0232287	-0.291852	-0.304487	-0.195855	0.020908	-0.41814	-0.238942	-0.297474	-0.421641	0.140348	-0.161006	0.208193	0.331375	0.104962	-0.0793171
TCGA.A2.A04Q	-0.235866	-0.224178	-0.0314949	-0.254546	0.453467	-0.18504	-0.203028	-0.172157	-0.0166573	0.0418743	-0.0637307	0.245291	-0.276802	0.185619	0.195936	0.236651	-0.168966	-0.333096	-0.205417	-0.144726	-0.180971	-0.0252923	0.00179881	-0.137019	-0.127714	-0.401851	-0.454427	0.216966	-0.246645	0.0885374	0.464216	0.681827	0.0591426	0.131558	0.163776	-0.250229	-0.404196	-0.483292	-0.225373	-0.51381	-0.0483004	0.121053	-0.229894	-0.448628	-0.136261	0.00494958	-0.123502	0.0593797	0.0605788
TCGA.A2.A04R	-0.307726	-0.643259	0.11572	-0.110301	-0.125599	-0.277514	0.0464545	-0.193863	-0.271877	0.0351908	0.278849	-0.0254072	0.0199454	-0.167185	-0.104572	-0.3714	0.0894735	-0.177992	-0.182087	-0.474305	-0.24595	-0.363677	-0.465518	-0.393898	0.074411	0.362494	0.065596	0.379215	-0.117964	-0.199296	0.301838	-0.487074	0.263483	0.285565	0.314287	-0.268724	-0.600513	-0.547311	0.278473	-0.234429	-0.234518	0.144338	-0.467864	-0.0592928	-0.0311802	0.308889	-0.354004	-0.0990962	-0.136142
TCGA.A2.A04T	0.0911811	-0.356723	-0.258126	-0.138447	-0.219298	-0.0624946	-0.0848764	-0.0703781	-0.110164	-0.456772	-0.401936	-0.213268	-0.281838	0.0902867	-0.0494177	-0.165062	0.143916	-0.500846	-0.28556	0.584937	0.437966	0.506018	0.0169309	-0.124743	0.00350964	-0.499657	-0.51514	0.178618	-0.405821	0.357364	0.292434	0.350334	-0.276464	-0.0544773	-0.157852	-0.17239	0.276034	-0.0727741	-0.34858	0.0635457	-0.0032762	-0.436335	-0.215323	-0.444409	-0.444096	-0.470736	0.209362	0.0411911	0.254111
TCGA.A2.A04U	-0.0716687	-0.585483	-0.383758	-0.564936	-0.125794	-0.0196645	-0.0788648	-0.122356	-0.129645	-0.107536	0.0332189	0.00471444	-0.288432	-0.144349	-0.39552	-0.196691	0.298073	-0.297803	-0.160248	0.226389	0.207661	-0.32482	0.0111223	-0.25296	0.125675	-0.478701	-0.519422	0.0579389	-0.258213	0.137927	0.145514	-0.410057	-0.297477	-0.244235	-0.273358	-0.158717	-0.160306	0.0182312	-0.0871413	-0.18573	-0.236938	-0.333368	-0.292948	0.375178	-0.523388	-0.188718	0.467382	0.138609	0.313425
TCGA.A2.A04V	-0.37564	-0.535249	-0.234442	-0.38152	0.0552625	-0.307352	-0.0574614	-0.23381	-0.205029	-0.271215	-0.195141	-0.211969	-0.380749	-0.393014	-0.335427	-0.345554	-0.216089	-0.226335	-0.12131	-0.283983	0.101174	-0.167771	-0.0445868	-0.270468	0.054787	-0.00985474	-0.0317387	0.27075	-0.0383143	0.0691142	-0.142121	-0.470767	0.000125242	0.0320024	0.0363815	-0.187625	-0.491462	-0.44928	-0.310447	-0.448952	-0.429541	-0.324703	-0.131035	-0.430404	-0.427902	-0.265908	-0.0468334	-0.1459	-0.233941
TCGA.A2.A04W	0.501171	-0.0682308	0.412534	0.248145	0.359815	0.0651909	-0.156726	-0.0518121	-0.0618944	0.158384	-0.0100993	0.0119125	0.240435	0.332447	0.271722	0.0593494	0.217667	-0.135465	-0.0173573	-0.203628	-0.373765	-0.395846	-0.0837372	0.144384	0.381535	0.0150793	0.141551	0.0896465	0.0427258	0.292589	0.0409663	-0.489723	0.322015	0.236783	0.350994	0.183344	0.213015	0.213088	0.580854	-0.0248262	0.037832	0.357674	-0.230022	0.595182	-0.0923001	0.269546	0.219035	-0.00318653	-0.11221
TCGA.A2.A04X	0.315984	0.374523	-0.142978	0.0385277	-0.0449446	-0.131791	0.199846	-0.218689	-0.143413	-0.27882	-0.242428	-0.0142172	-0.173627	-0.250404	-0.238138	0.0890826	0.293535	-0.270105	0.213815	0.413231	-0.0633518	0.111993	0.210031	0.217577	-0.0427284	-0.277731	-0.0570941	0.0748444	-0.22651	-0.258028	0.357221	0.488976	-0.315539	-0.331558	-0.211907	-0.102361	-0.0933492	-0.1826	0.325058	-0.0662375	0.0332237	0.461311	0.106882	0.437566	-0.254146	0.0144715	0.243885	0.0710929	0.237915
TCGA.A2.A04Y	-0.0647106	-0.061329	-0.491564	-0.18037	-0.512845	0.003154	-0.169143	-0.198275	-0.420244	-0.322818	-0.323473	-0.227975	-0.321095	-0.415192	-0.319636	-0.267343	-0.0626994	-0.332541	-0.223797	-0.124573	-0.207599	0.0159097	-0.0996152	0.0939413	0.0748612	0.202146	-0.353845	0.350947	-0.290295	0.0028782	-0.0493773	0.114142	-0.258057	-0.292272	-0.0789622	-0.323027	-0.0440671	-0.373429	-0.308976	-0.393516	-0.262393	-0.34363	-0.196462	0.412451	-0.148262	-0.210418	0.301881	-0.191105	-0.197628
TCGA.A2.A0CK	-0.125685	-0.285332	-0.28012	-0.290069	-0.177846	0.0134214	0.297038	0.0208706	-0.170622	-0.32643	-0.466184	-0.253592	-0.211149	-0.474225	-0.014172	0.14141	-0.0893834	-0.210991	-0.107895	-0.264312	0.0787933	-0.00761016	0.308716	-0.0669549	-0.0599711	-0.47329	0.395771	0.0207443	-0.322132	-0.0454784	-0.392398	-0.213979	-0.0665557	-0.218291	-0.00556435	-0.490356	-0.406181	-0.426273	-0.504274	-0.371187	-0.488283	-0.548596	-0.0300462	-0.379671	-0.205993	-0.489801	0.0968547	-0.00987234	0.142833
TCGA.A2.A0CL	0.0153697	-0.0998282	-0.113224	0.0206362	0.0862214	-0.0677898	-0.104479	-0.0747198	-0.208735	-0.453825	-0.537959	-0.403985	-0.168772	-0.327011	0.551848	0.20396	-0.104705	0.071654	-0.236996	0.290792	0.191178	0.449495	0.271505	0.109772	-0.378606	-0.122415	0.103451	0.0703941	-0.375209	0.160753	-0.167469	0.719552	-0.123175	-0.16979	0.0100958	-0.457655	-0.197008	-0.367	-0.57338	-0.418896	-0.268167	-0.639278	-0.307791	-0.332318	-0.449171	-0.546117	-0.344066	-0.0786677	-0.0828946
TCGA.A2.A0CM	0.004451	-0.468361	-0.287163	-0.354741	0.0797706	-0.345492	-0.160787	-0.292619	-0.278508	-0.54313	-0.578991	-0.591413	-0.353431	0.0494692	-0.029923	0.348462	-0.132827	-0.230877	-0.114839	0.482058	0.526903	0.30501	0.190204	-0.0835092	-0.266471	-0.3194	-0.501729	-0.244415	-0.511065	0.396779	0.320427	0.50461	-0.260244	-0.198729	-0.278107	-0.312677	0.0577006	-0.0201849	-0.462478	-0.213028	0.18291	-0.56641	-0.293268	-0.319382	-0.533181	-0.499304	-0.0614957	0.134347	0.402266
TCGA.A2.A0CO	0.0876955	0.108132	-0.103687	0.293358	0.0551815	0.0876221	0.283678	0.0681909	-0.0739997	-0.323075	-0.530385	-0.0679731	0.00988344	-0.409683	0.328443	0.447957	-0.468663	0.0522737	-0.430499	-0.345426	0.00567092	-0.255561	0.295361	0.157334	-0.187826	0.0516362	0.706806	-0.132755	-0.111365	0.0782339	-0.386277	0.487694	0.107228	0.117674	0.206026	-0.452599	-0.360455	-0.283514	-0.597081	-0.360685	-0.323465	-0.646238	-0.0544383	-0.273644	-0.217386	-0.555896	-0.319683	-0.0404459	-0.219587
TCGA.A2.A0CP	-0.422696	-0.524911	-0.210521	0.023293	0.0332858	-0.059127	-0.172235	-0.121424	-0.021366	0.168333	-0.0058626	0.0737989	-0.280477	-0.279817	0.0713414	-0.13789	-0.306142	-0.195144	-0.202383	-0.449172	-0.404769	-0.488289	-0.0712805	-0.324431	0.194225	0.371778	0.179672	0.22828	-0.387255	-0.111624	-0.0505015	-0.383096	0.249616	0.332134	0.328483	-0.251527	-0.547876	-0.27727	-0.14028	-0.300713	-0.480852	0.121389	-0.017586	-0.395734	0.209785	0.12586	0.0289737	-0.0944504	-0.409443
TCGA.A2.A0CQ	0.218904	0.149404	-0.278971	-0.331646	0.0571508	-0.134073	0.147471	-0.0254785	-0.187947	-0.100602	-0.159094	-0.199995	-0.118129	-0.218681	0.0874312	-0.0363644	0.109645	-0.192951	-0.136288	-0.20878	-0.187039	-0.183664	0.343673	-0.078739	0.196169	-0.296306	0.0482872	0.0821021	-0.264861	-0.0890277	0.333418	-0.448712	-0.162574	-0.19033	-0.166559	-0.277443	-0.326133	-0.0295562	-0.299232	-0.259041	-0.36727	-0.335366	-0.303624	-0.00448591	0.0660812	-0.323223	0.3485	0.0765931	-0.0435095
TCGA.A2.A0CR	-0.370261	-0.335543	-0.354677	-0.0826023	-0.0386693	-0.0413633	-0.387813	-0.0187353	-0.148613	0.258316	-0.106875	-0.0416648	-0.376514	-0.138969	0.188874	0.224787	-0.0855524	-0.0409931	-0.0962599	-0.466324	-0.458421	-0.359214	0.112025	-0.0505322	0.225968	0.00779178	-0.195837	-0.0550659	-0.294026	0.0540982	0.335097	0.649477	0.00215127	-0.130635	0.108856	-0.340766	-0.524758	-0.196055	-0.230419	-0.236154	-0.271609	-0.242336	-0.190664	-0.459454	0.062031	0.051047	0.379133	0.0157755	0.00879731
TCGA.A2.A0CS	-0.00649352	-0.117008	0.0378974	-0.0950751	0.0191279	-0.207992	0.299275	-0.132782	-0.230476	-0.0268486	-0.157547	-0.179831	0.216232	-0.174469	0.357655	-0.0584136	0.347439	-0.0747649	-0.045826	-0.380403	-0.25047	-0.318383	-0.0219423	-0.0182475	0.182504	0.286024	-0.360635	-0.0762204	-0.0730782	-0.0950147	0.266692	-0.345558	0.191415	0.182118	0.212073	-0.236287	-0.262618	-0.286031	0.383377	-0.296781	-0.477673	0.376148	-0.0420763	0.227406	0.135806	0.165877	0.212534	-0.0591646	-0.251494
TCGA.A2.A0CT	0.451822	0.335603	0.0379511	-0.0118174	0.0172314	-0.0650555	0.639155	0.0723932	-0.270362	-0.263687	-0.359321	-0.30133	0.323745	-0.355021	0.244022	0.330024	0.266791	-0.271685	0.040201	0.373769	0.472262	0.371847	0.291267	0.298652	0.113652	-0.0334332	0.233878	-0.190431	0.103805	-0.173513	-0.0588972	-0.590201	-0.301646	-0.273967	-0.283965	-0.237645	0.0966528	-0.236544	-0.0333705	-0.298437	-0.0877196	-0.139674	-0.0559914	0.552507	-0.356792	-0.082874	0.393062	0.0686399	0.162368
TCGA.A2.A0CU	0.0315702	-0.196146	-0.197995	-0.148942	0.0934846	-0.000511727	0.499823	0.109294	-0.0395501	-0.374238	-0.466646	-0.102629	-0.0388078	-0.526175	-0.205294	-0.217052	-0.164991	-0.0566181	0.104145	-0.0454006	-0.13085	-0.0821412	0.247009	0.149076	-0.0106154	0.207407	0.207713	0.144981	-0.12419	0.186342	-0.383953	-0.612347	0.210128	0.208427	0.197413	-0.0894562	0.0185251	0.0640307	-0.424508	-0.0827465	0.0194959	-0.356822	-0.0895589	0.398574	-0.151045	-0.405085	-0.0330936	-0.0921036	-0.0358328
TCGA.A2.A0CV	0.203406	-0.26288	-0.2073	-0.405753	0.127576	-0.142673	0.350314	-0.247848	-0.287126	-0.416691	-0.571726	-0.580207	0.0889359	-0.150342	0.371682	0.325624	-0.0347847	0.0349589	-0.167422	-0.121939	0.331556	-0.0460801	0.477189	-0.146085	-0.130271	-0.204629	0.118791	-0.327623	-0.450222	0.0807344	-0.0345496	-0.144426	0.0113739	-0.115723	0.0344815	-0.513901	-0.352126	-0.381794	-0.467525	-0.372488	-0.381707	-0.47588	-0.31231	-0.31981	-0.00797624	-0.534458	-0.101209	-0.0251586	-0.111472
TCGA.A2.A0CW	0.322859	0.17678	-0.319933	-0.0277705	-0.0517504	-0.112022	0.312067	-0.172125	-0.466261	-0.46854	-0.568665	-0.420278	-0.157417	-0.363969	-0.0896411	0.109073	0.438396	-0.029167	-0.125214	0.602345	0.465882	0.370305	-0.00272594	0.216115	-0.121718	-0.307066	-0.55164	-0.342058	-0.375895	0.213178	-0.067807	-0.185823	-0.230874	-0.305352	-0.204056	-0.0789005	0.231671	-0.225903	-0.39324	0.0409609	0.0489994	-0.376742	-0.119989	0.402671	-0.396687	-0.461035	0.332044	-0.0446786	0.306579
TCGA.A2.A0CX	0.245027	0.197568	0.0723025	0.159236	0.128671	0.0859466	0.283925	-0.0234313	-0.0872949	-0.270578	-0.219727	0.103123	0.0748992	-0.279026	-0.222037	0.161048	0.0298885	-0.328235	0.102836	0.317604	0.25048	0.135785	0.0439872	0.240527	0.0914736	0.0730243	-0.101977	-0.193642	-0.227943	0.111377	0.347289	-0.0344605	0.0697133	0.00526126	0.0789454	-0.0908562	0.17783	-0.044453	0.0549758	-0.0768825	0.0782202	-0.000914564	-0.0347785	0.565152	-0.184369	0.0937489	0.0190718	0.125821	0.214477
TCGA.A2.A0CY	-0.24795	-0.489	0.242168	-0.421648	-0.207088	-0.0373095	-0.442272	-0.00434354	-0.231842	-0.0343695	0.114449	-0.19631	-0.36549	0.285793	0.0338254	-0.165638	-0.0862592	-0.131494	-0.39044	0.147697	0.0969232	-0.189732	-0.134987	-0.424607	0.0785746	-0.0194386	-0.17175	0.241731	-0.240042	-0.0219969	-0.0241329	-0.326666	-0.182285	-0.243678	-0.156717	0.056812	-0.534635	0.0826301	-0.081979	0.0822151	-0.239266	-0.132314	-0.351497	-0.0460988	-0.223747	0.151461	-0.148778	0.146793	0.0254217
TCGA.A2.A0CZ	-0.225048	-0.423753	0.180065	-0.0284531	0.343201	-0.0335565	-0.470784	-0.165594	0.241738	0.291385	0.216875	-0.0138038	-0.13336	0.1211	0.131341	0.0889194	-0.0582943	-0.34638	-0.24829	-0.658026	-0.480894	-0.614181	-0.320301	-0.188953	-0.0427956	0.396119	0.144763	0.378557	-0.112336	-0.264122	0.37732	0.318508	0.418308	0.431991	0.469894	-0.262625	-0.564799	-0.486781	-0.199934	-0.289061	-0.307188	0.201418	-0.167526	-0.512503	0.10323	0.237004	-0.468398	-0.189299	-0.484937
TCGA.A2.A0D0	-0.0682802	-0.464962	-0.28396	-0.4134	-0.0581323	-0.135458	-0.28499	-0.167399	-0.297017	-0.204584	-0.400795	-0.403162	-0.327016	0.386418	-0.134719	-0.205084	-0.207015	-0.276721	-0.206955	0.48552	0.327503	0.0141854	-0.178642	-0.39345	0.185264	-0.233987	-0.503085	-0.143022	-0.191279	0.279355	0.113114	0.295638	-0.174394	-0.243508	-0.156961	0.0405761	0.308616	0.244943	0.0537592	-0.222069	0.106709	-0.414913	-0.251798	0.0512242	-0.275542	-0.140879	0.408349	0.182629	0.391692
TCGA.A2.A0D1	0.20465	-0.250655	-0.00466503	-0.363789	0.0513982	-0.0794257	0.0788492	-0.109551	-0.293972	-0.366743	-0.102767	-0.119347	-0.14971	-0.439171	-0.386486	-0.120053	-0.384673	-0.461548	-0.0690481	0.37664	0.199735	0.411784	0.142424	-0.113031	-0.0783748	-0.0689036	-0.0117597	0.149562	-0.405425	-0.22748	-0.275191	-0.507333	-0.211482	-0.250984	-0.176353	-0.133238	-0.28398	-0.318043	-0.260531	-0.156791	-0.0817818	-0.310287	-0.142011	-0.200544	-0.358956	-0.284522	0.280774	-0.0259867	0.0520794
TCGA.A2.A0D2	0.126958	-0.168153	-0.265908	-0.180622	0.379023	-0.281106	-0.281696	-0.229637	-0.327082	-0.48518	-0.546165	-0.294629	-0.256638	0.069147	-0.0844105	0.0535717	0.0145578	-0.400572	-0.128693	0.600553	0.40714	0.231909	0.235652	-0.0438683	-0.233192	-0.211419	-0.200714	-0.241297	-0.375355	0.365053	-0.153087	0.483325	-0.148295	-0.0459693	-0.117151	-0.0777049	0.368239	0.0317244	-0.37006	-0.254586	-0.0723985	-0.458427	-0.322777	0.337905	-0.204116	-0.377561	0.148085	0.0726282	0.249597
TCGA.A2.A0D3	0.29955	0.449522	-0.275579	-0.427372	-0.197537	-0.134435	0.623212	-0.231383	-0.305291	-0.386155	-0.389233	-0.328792	0.0677219	-0.433532	-0.226364	-0.365866	0.239402	-0.121238	0.134575	0.57073	0.426235	0.499638	0.358832	-0.142126	-0.303305	-0.535041	0.162159	-0.210319	-0.443738	-0.0812372	-0.322277	-0.106444	-0.270494	-0.301251	-0.302843	-0.441849	0.0524723	-0.210313	-0.311023	-0.229677	-0.212829	-0.297581	0.100139	-0.232958	0.0625796	-0.406717	-0.136797	0.0183144	0.104061
TCGA.A2.A0D4	-0.174674	-0.514771	-0.0982189	-0.134936	-0.00564208	0.159338	0.341838	0.0790145	-0.141432	-0.242974	0.110919	-0.0161343	-0.275251	-0.358299	-0.0189467	-0.385347	-0.0216849	-0.220188	0.292273	-0.145918	-0.125721	-0.170979	-0.151409	-0.235937	0.126519	0.291463	-0.0393473	0.0593671	-0.103107	-0.131058	0.211335	-0.57766	-0.156483	-0.148477	-0.0427309	-0.205037	0.0108369	-0.277383	-0.0537527	-0.294629	-0.288596	0.00911816	-0.261147	0.240873	-0.118923	0.00723451	-0.0140957	0.195958	0.22513
TCGA.A2.A0EM	0.331452	0.17006	0.149245	-0.31451	0.165774	-0.0786466	0.445042	-0.0718868	-0.16426	-0.326515	-0.373252	0.0257662	0.259553	-0.332208	0.0754632	0.157028	0.0368359	-0.12301	0.102996	0.24052	0.209192	0.0995435	0.174212	0.00328399	0.0623445	0.0938165	0.221628	-0.181193	-0.162844	0.0247375	-0.432635	-0.585054	0.229313	0.251687	0.20524	-0.185253	0.0953265	-0.212504	0.0191296	-0.20885	-0.234848	0.133473	0.143024	0.527037	0.15391	-0.132623	-0.0372715	0.0902246	0.0696441
TCGA.A2.A0EN	-0.304151	-0.260482	0.13944	0.149799	-0.089732	0.2073	-0.559845	0.0067018	-0.0480776	0.164254	0.00978525	0.0452812	-0.0310191	-0.218378	0.280411	0.146757	-0.0815561	-0.176235	-0.265904	-0.606371	-0.400492	-0.404428	-0.207977	-0.115884	-0.121218	0.362983	-0.354498	0.294449	-0.0450987	0.0849017	0.0461188	0.520052	0.359552	0.40635	0.39962	-0.3198	-0.466582	-0.465815	0.0828224	-0.374554	-0.306081	0.0100513	-0.185191	-0.390684	0.17245	0.0731586	-0.500868	-0.237286	-0.462895
TCGA.A2.A0EO	0.0764982	-0.175099	0.0844357	-0.317939	0.119367	-0.218706	0.0634195	-0.0370101	-0.0759731	-0.235392	-0.382325	-0.112545	0.200688	-0.364052	0.271467	-0.044161	-0.174083	-0.165841	0.0467801	-0.288271	0.0762922	0.117008	0.200406	-0.0424655	-0.123926	0.0350816	0.172773	-0.177692	-0.053795	-0.0352428	0.314727	-0.237851	0.314277	0.378668	0.310467	-0.35039	-0.323318	-0.425771	-0.316154	-0.275844	-0.314366	-0.13083	-0.174277	0.332586	0.184446	-0.118028	-0.373022	-0.117871	-0.33211
TCGA.A2.A0EP	-0.436202	0.00921303	0.085246	0.264263	0.289679	0.0725245	-0.603351	-0.0113049	0.0757711	0.295822	-0.0538791	0.0518555	-0.00257848	-0.188765	0.483234	0.375433	-0.18919	-0.232221	0.0240714	-0.664136	-0.426321	-0.401131	0.0872185	0.189567	-0.125426	0.403112	0.020263	0.342979	0.00214424	-0.00176097	0.0756816	0.64054	0.313759	0.0926067	0.373523	-0.104449	-0.409467	-0.252748	-0.176407	-0.175457	0.0719997	-0.262385	-0.0816186	-0.533556	0.220602	-0.0384973	-0.511764	-0.165559	-0.43235
TCGA.A2.A0EQ	0.164057	-0.148354	-0.158744	-0.336284	-0.019513	-0.288456	-0.152319	-0.233893	-0.20707	-0.332227	-0.448815	-0.116104	-0.0364148	-0.287196	-0.127165	-0.0526055	0.0809243	0.296231	0.174126	0.273169	0.0905836	0.164974	0.268925	0.0237966	-0.121619	-0.438185	-0.404718	0.153558	-0.095757	0.184311	0.385227	0.62199	-0.356981	-0.316064	-0.2886	-0.305341	0.0355264	-0.0371205	-0.330051	-0.211696	-0.207684	-0.543615	-0.19119	0.0313501	-0.25992	-0.330994	0.283813	0.0204564	0.143646
TCGA.A2.A0ER	-0.42302	-0.439723	0.06191	-0.235562	-0.174905	-0.0659382	-0.430278	-0.149018	0.0231778	0.113046	0.393054	0.1665	-0.157644	0.00770657	-0.0262275	-0.224154	-0.145136	-0.0145339	-0.0488298	-0.53183	-0.306658	-0.275425	-0.51751	-0.242312	-0.0358626	0.354111	0.418653	0.381924	0.204797	-0.241963	-0.00560747	-0.336647	0.269637	0.300511	0.312059	-0.056548	-0.299428	-0.416321	0.322434	-0.233873	-0.303902	0.427992	-0.0453974	-0.242226	0.24069	0.414152	-0.486424	-0.258511	-0.421285
TCGA.A2.A0ES	0.122104	0.127389	0.00918916	-0.296233	-0.197501	-0.0925561	0.164243	-0.0522853	0.102546	-0.374559	-0.469092	-0.299557	0.164315	-0.362231	0.114335	-0.170917	-0.00979004	-0.25615	-0.235271	-0.198548	0.144846	0.194014	0.255759	-0.00665489	-0.382045	-0.0413168	0.643414	-0.260855	-0.117409	-0.0541884	-0.52432	-0.329685	0.0563735	0.232551	0.0764426	-0.415984	-0.325585	-0.484481	-0.483192	-0.348152	-0.262929	-0.456786	0.0300122	-0.520081	-0.0865512	-0.445654	-0.481242	-0.190946	-0.39325
TCGA.A2.A0ET	-0.0344343	0.181759	-0.298236	-0.306283	-0.629255	-0.323971	0.462505	-0.196329	-0.363051	-0.452098	-0.434645	-0.317274	-0.0199987	-0.612537	-0.472489	-0.318846	0.213765	-0.324111	-0.0515791	0.525349	0.306456	0.588588	0.260475	0.062758	-0.333452	-0.314509	0.263018	0.0345334	-0.192468	-0.370696	-0.223803	-0.259846	-0.395072	-0.428145	-0.389844	-0.400833	-0.0201509	-0.344122	-0.369286	-0.31887	-0.555602	-0.303349	-0.308171	-0.104118	-0.0324163	-0.474032	-0.173578	-0.115688	0.0788699
TCGA.A2.A0EU	0.018287	-0.353421	-0.19926	-0.410457	-0.213062	-0.173717	0.392667	-0.0900398	-0.280505	-0.363906	-0.324069	-0.313298	-0.222177	-0.446327	-0.130398	-0.359389	-0.109071	-0.280237	-0.00659522	0.430468	0.231726	0.320148	0.327425	-0.0225985	-0.1097	0.0629532	0.111118	-0.183561	-0.10967	0.155077	-0.419506	-0.523106	-0.163373	-0.0573731	-0.176002	-0.200127	0.0182024	-0.183285	-0.316278	-0.258486	-0.392594	-0.0529084	0.0787453	0.268381	-0.27378	-0.179843	0.251121	-0.129233	-0.000988921
TCGA.A2.A0EV	0.200304	0.431465	-0.0772185	0.233605	-0.199093	-0.0400554	0.155165	-0.190036	-0.19075	-0.359176	-0.437761	-0.200896	0.0695177	-0.194686	0.428803	0.193069	0.264067	-0.176022	0.0364147	0.199431	0.0461214	0.420827	0.383508	0.40888	-0.198261	0.144962	0.291751	-0.234063	-0.474469	0.197124	-0.271761	0.00819194	0.109212	0.2268	0.155402	-0.262374	-0.087118	-0.315427	-0.358661	-0.118407	-0.166952	-0.252868	0.0326406	0.0542259	-0.193646	-0.263533	-0.270926	-0.117089	-0.125197
TCGA.A2.A0EW	-0.177329	0.120223	0.0830009	0.0393052	-0.0532626	0.128983	0.297611	-0.118774	-0.148053	-0.347438	-0.541065	-0.463227	0.141331	-0.421291	0.189641	0.266393	-0.314083	-0.166953	-0.211045	-0.301432	0.0828439	0.0282317	0.0390015	-0.121367	-0.359408	0.223359	0.471545	-0.0982615	-0.298932	-0.315961	-0.502105	-0.205942	0.209473	0.251758	0.206309	-0.399688	-0.206605	-0.327694	-0.172106	-0.282579	-0.191904	-0.337507	0.239167	-0.583149	0.128685	-0.2649	-0.459633	-0.101939	-0.393866
TCGA.A2.A0EX	-0.0649853	-0.33859	0.121002	-0.463434	-0.068274	-0.0939371	-0.168116	-0.125045	0.0739791	-0.0351525	-0.256716	-0.108476	-0.0168244	-0.357917	0.293116	-0.0882006	0.0223307	-0.233492	0.114197	-0.0111143	-0.0589943	-0.0744307	-0.129936	-0.184287	0.0485358	0.261133	-0.0734695	-0.26712	0.134844	-0.0320024	-0.331103	-0.131712	0.195735	0.218497	0.18714	-0.263737	-0.215453	-0.235725	0.0227495	-0.126155	-0.401945	0.25602	0.0173947	-0.302879	0.314756	-0.0355583	0.0080686	0.0756091	-0.147657
TCGA.A2.A0EY	0.345222	0.485936	-0.0523489	-0.275585	0.343732	-0.0137678	0.34687	-0.106298	-0.401571	-0.315587	-0.293599	-0.225897	0.102953	0.139981	-0.234772	0.175152	-0.0324298	-0.394189	-0.0423824	-0.0376317	-0.0201434	0.166882	0.275014	0.131057	-0.145962	0.260652	-0.4808	0.239473	-0.47467	0.243418	-0.393921	0.0700079	-0.014081	-0.120505	0.0369919	-0.340852	-0.0985022	-0.459773	0.0510349	0.000297257	-0.10718	-0.0748642	-0.154508	0.304475	-0.335437	0.122864	-0.355283	-0.0465536	-0.147248
TCGA.A2.A0ST	-0.192732	-0.45074	-0.141842	-0.39039	0.174711	-0.261846	-0.64328	-0.354914	-0.0107589	-0.0896368	-0.343651	-0.350634	-0.283672	0.170946	0.380193	0.254163	-0.17183	-0.252131	-0.260916	0.0317701	-0.028907	0.28866	-0.00225364	-0.196521	-0.399477	-0.297564	-0.535475	0.141653	-0.216433	0.24297	0.330862	0.810117	-0.241851	-0.0691599	-0.164036	-0.221707	-0.50255	-0.344693	-0.519331	-0.383711	-0.168932	-0.380429	-0.424367	-0.410419	-0.221164	-0.237893	-0.518936	-0.078392	-0.172134
TCGA.A2.A0SU	0.180096	-0.19815	-0.243446	-0.370111	0.319444	-0.351267	0.196305	-0.267147	-0.248194	-0.407977	-0.484534	-0.3105	-0.0632487	-0.270018	-0.36436	-0.0125854	0.0319308	-0.227852	0.0494363	0.0646185	0.138742	-0.216396	0.235241	-0.0528916	-0.00658715	0.0306266	0.437034	-0.069385	-0.2765	0.152319	0.0690277	-0.215451	0.173038	0.11958	0.129312	-0.289587	0.00375033	-0.280865	-0.0359847	-0.266883	-0.381403	0.0526748	-0.0395129	-0.359775	0.313687	-0.344415	0.0866787	-0.0224751	-0.0075012
TCGA.A2.A0SV	-0.0511846	0.0909112	-0.170208	0.211868	-0.11176	-0.0767683	0.012846	-0.158141	-0.269918	-0.199987	-0.369677	-0.2129	-0.14103	-0.34477	0.34121	0.153453	0.0724208	0.0451491	0.196691	0.273891	0.114363	0.249943	0.301246	0.319833	0.0608426	0.396545	-0.509313	0.00962198	-0.3809	0.276601	0.256569	-0.195987	-0.0924416	-0.201599	-0.0200967	0.134636	0.244794	0.283935	-0.199998	0.228243	0.0303306	-0.24804	-0.0998054	0.400828	-0.0970386	-0.0781152	0.373049	0.128657	0.144458
TCGA.A2.A0SW	0.266551	0.288325	-0.091774	-0.0667969	0.0189687	0.019682	-0.186808	-0.0702715	-0.0633374	0.167953	0.222777	0.319714	0.057065	-0.3453	-0.0689091	-0.0629824	-0.131286	0.0105667	0.0304346	0.184059	0.118907	-0.203413	0.0714682	0.29761	0.112323	0.00628495	-0.577394	0.0370183	-0.0561254	-0.0489979	0.362261	0.610189	-0.0195626	-0.220653	-0.0897178	-0.0826555	0.216819	0.0246585	0.121834	-0.27657	-0.0380859	-0.0270192	-0.0335046	0.481899	-0.22224	-0.0794455	0.314426	0.00733438	0.031507
TCGA.A2.A0SX	-0.192578	-0.4727	-0.246187	-0.371527	-0.0619942	-0.149491	-0.463363	-0.270433	-0.168234	-0.452996	-0.591334	-0.471559	-0.28419	0.126112	0.13312	-0.110409	-0.162815	-0.337996	-0.350836	0.351981	0.273275	0.628771	0.0765471	-0.122013	-0.412852	-0.417674	-0.194026	-0.204052	-0.515204	0.259338	-0.222498	0.592025	-0.147344	-0.011249	-0.177204	-0.315823	-0.209044	-0.221738	-0.4983	-0.427769	-0.19644	-0.466789	-0.387403	-0.353264	-0.479254	-0.529848	-0.579194	-0.142477	-0.178759
TCGA.A2.A0SY	-0.0223944	-0.237705	0.0416469	-0.405109	-0.215459	-0.0616012	0.148704	-0.263864	-0.266593	-0.132645	-0.389788	-0.35524	0.0565919	-0.372061	0.041315	0.049216	-0.176393	-0.149883	0.0333959	-0.0492878	0.0279293	0.318265	0.0793915	-0.193563	-0.110148	0.00370012	0.160345	-0.298695	-0.116881	0.0374885	-0.173826	0.326786	0.104658	0.113205	0.149033	-0.29717	-0.38981	-0.226409	-0.223099	-0.242797	-0.256542	-0.0809569	0.142671	-0.379515	-0.103419	-0.297407	-0.294426	0.0235344	-0.147714
TCGA.A2.A0T0	-0.0092891	-0.55312	-0.210021	-0.477006	0.209095	-0.0958164	0.214567	-0.229463	-0.476197	-0.482962	-0.51322	-0.270178	-0.307832	0.280018	-0.393759	-0.248765	0.0691721	-0.223439	-0.20395	0.570526	0.386385	0.297336	-0.000112901	-0.279881	-0.0197623	-0.177486	-0.331511	-0.188954	-0.348005	0.269654	0.0707673	-0.383934	-0.224376	-0.132686	-0.207879	-0.0466917	0.350326	0.0339542	-0.0952776	-0.0847905	0.065856	-0.407817	-0.289627	0.379132	-0.165768	-0.251482	0.413611	0.215288	0.265105
TCGA.A2.A0T1	0.101799	-0.214172	0.137328	0.00438515	0.483679	0.239451	-0.350049	-0.0218968	0.0144299	0.106846	0.0187036	-0.00751629	-0.0882826	0.0316783	0.413198	0.538154	-0.285613	-0.146484	-0.000737134	-0.439765	-0.365883	-0.113769	-0.218023	0.0227762	0.150921	-0.0254779	-0.247611	0.119394	-0.12321	0.411165	0.457423	0.579461	0.221396	0.241823	0.277146	-0.106947	0.0345772	-0.390737	0.254252	-0.316985	0.0395857	0.228671	-0.216526	0.117452	-0.0990754	0.0858233	-0.137942	-0.104525	-0.120564
TCGA.A2.A0T2	0.265989	-0.219614	-0.281718	-0.191362	0.231941	0.0221987	0.0723984	-0.148593	-0.363649	-0.200539	-0.399705	-0.217164	-0.193238	0.219043	0.109195	-0.154388	-0.0527362	-0.0135505	-0.23941	0.239351	0.0657043	-0.0425099	0.170227	0.100757	0.234005	-0.243111	-0.639461	-0.0419634	-0.288773	0.386172	0.213755	-0.284727	-0.0503893	-0.0300991	-0.0552537	0.120832	0.0413783	0.189735	-0.140159	-0.0874496	0.266388	-0.310324	-0.202942	0.348989	-0.238572	-0.00227311	0.358584	0.103528	0.00575268
TCGA.A2.A0T3	0.368964	-0.297996	-0.147183	-0.1582	-0.0968741	-0.239689	0.378144	-0.237164	-0.364737	-0.548292	-0.493155	-0.406889	-0.308665	-0.258889	0.0667037	-0.343875	-0.0190159	-0.198919	-0.120207	0.40857	0.50218	0.345618	0.422156	-0.15775	-0.268713	-0.301624	0.314689	-0.261698	-0.408034	0.162976	-0.345094	-0.616517	-0.114714	-0.131873	-0.0844521	-0.487371	-0.294545	-0.516831	-0.413399	-0.467228	-0.436298	-0.584586	-0.286748	0.226487	-0.34191	-0.469739	-0.107915	-0.00031199	0.136534
TCGA.A2.A0T4	-0.153703	-0.0723559	-0.0203412	0.135013	0.0169524	0.0215477	0.299965	-0.105927	-0.080592	-0.228416	-0.446886	-0.208354	-0.118353	-0.423135	0.571107	0.397383	-0.0637031	-0.089223	-0.381535	-0.221171	-0.319157	0.0782725	0.0346235	0.29611	-0.0126449	0.263341	0.0811757	-0.206687	0.0452202	0.169199	-0.0538121	-0.0138636	0.151481	0.166356	0.209821	-0.239003	-0.144527	-0.373009	-0.247343	-0.105127	-0.0663615	-0.210901	0.0864312	0.223868	0.0354196	-0.247214	0.0872418	0.0541345	0.0082109
TCGA.A2.A0T5	0.321219	-0.234978	-0.178109	-0.389103	0.0960018	-0.174337	0.140241	-0.197029	-0.0474788	-0.308862	-0.510055	-0.29442	0.0236094	-0.273649	0.220044	-0.07878	0.235214	-0.342375	-0.153584	0.360525	0.323557	0.31076	0.0527957	-0.345451	-0.020857	-0.421287	0.301313	-0.17272	-0.16473	0.0280078	-0.210133	-0.56873	0.108017	0.190768	0.193382	-0.443799	-0.182122	-0.22591	-0.315218	-0.371862	-0.217175	-0.248391	-0.101068	-0.319569	-0.0797414	-0.290277	-0.201601	0.151706	0.0899478
TCGA.A2.A0T6	-0.250715	-0.361967	0.188826	-0.00421859	0.233029	-0.228368	-0.380578	-0.242358	0.136379	-0.0511325	-0.216207	-0.0985911	-0.00717817	-0.204763	-0.0803002	0.096075	-0.318818	-0.186126	0.051929	-0.448017	-0.0341936	-0.0304851	-0.0747019	-0.18295	-0.340251	0.363743	0.235342	0.168825	-0.198086	-0.269409	-0.0590789	0.223221	0.315942	0.367178	0.314532	-0.384989	-0.430515	-0.515769	-0.240854	-0.408791	-0.377976	-0.0441291	-0.0667079	-0.457727	0.172445	-0.103313	-0.642095	-0.270479	-0.475986
TCGA.A2.A0T7	0.308208	0.0356396	0.0564143	0.242537	0.283603	-0.254705	0.243427	-0.218402	-0.350627	-0.464556	-0.527861	-0.247761	0.1629	0.115165	0.305696	0.270091	-0.215824	-0.381685	-0.330611	-0.041637	0.228466	0.419538	0.0811449	0.164842	-0.234237	0.271802	0.291326	-0.0492241	-0.367774	0.324015	-0.161078	-0.39389	0.172852	0.341376	0.198993	-0.485997	-0.439981	-0.476809	-0.456573	-0.422659	-0.437885	-0.362118	-0.368155	-0.270446	0.0209351	-0.511695	-0.489634	-0.217874	-0.37582
TCGA.A2.A0YC	0.197402	0.140852	-0.15067	-0.182388	-0.0598575	0.0434505	0.419542	-0.0165596	-0.0851485	-0.31536	-0.361315	-0.0474018	-0.0116219	-0.631415	-0.362015	0.0289597	0.0549811	0.0368989	0.146129	0.213101	0.0561231	0.399718	0.172887	0.255648	-0.148213	0.116892	0.340212	-0.0450297	-0.314676	-0.177228	0.13765	-0.368775	-0.0920565	0.00873729	-0.0846691	-0.302033	-0.0272073	-0.33773	-0.530093	-0.227263	-0.263577	-0.34714	0.0221317	-0.31904	-0.257733	-0.397053	-0.176951	-0.00748976	0.0501657
TCGA.A2.A0YD	-0.248256	-0.227561	0.0971978	-0.0801903	0.192902	-0.04338	-0.400463	-0.163312	0.102471	-0.11896	-0.33048	-0.228433	-0.00655702	0.0531598	0.172815	0.0422608	0.0182368	-0.140094	-0.20569	-0.348164	-0.0442342	-0.139805	-0.00716133	-0.161307	-0.264698	0.309532	0.371425	-0.00880235	-0.325915	0.106401	0.0219405	-0.0543543	0.438724	0.445162	0.435645	-0.369219	-0.475964	-0.558733	-0.386667	-0.374296	-0.217935	-0.167181	-0.136366	-0.384415	0.121328	-0.0691448	-0.666133	-0.187491	-0.386998
TCGA.A2.A0YE	0.357715	0.417622	0.233339	0.305697	0.448419	-0.219832	0.303346	-0.18272	-0.273117	-0.453899	-0.526361	-0.276874	-0.0371062	0.288766	0.122646	0.16625	-0.252571	-0.288187	-0.557431	0.27331	0.505986	-0.00486596	0.134533	0.225805	-0.379921	-0.320522	0.361034	-0.121413	-0.540194	0.185172	-0.106819	-0.503479	-0.150131	-0.0329395	-0.0720093	-0.308673	-0.400283	-0.00643803	-0.32374	-0.11297	0.250439	-0.467601	-0.500722	-0.450714	-0.250262	-0.414934	-0.315858	0.0349617	0.00500072
TCGA.A2.A0YF	0.27509	0.324855	0.0132974	0.112504	-0.159764	0.0564343	0.598585	-0.0673056	-0.11368	-0.360878	-0.399226	-0.306995	0.249817	-0.300883	0.0732618	-0.0566751	0.342316	-0.125415	-0.0874374	0.186297	0.188654	0.217002	0.142806	0.301854	-0.176605	-0.0404044	0.27169	-0.0829791	-0.257309	0.00383122	-0.214684	-0.478231	-0.0471053	-0.00094711	-0.0474699	-0.350302	-0.0743399	-0.37714	-0.216571	-0.321095	-0.168889	-0.148197	-0.138185	0.170294	-0.264344	-0.333715	-0.0555375	0.0751506	0.0115687
TCGA.A2.A0YG	0.45181	0.46003	-0.177001	-0.161268	-0.0082387	-0.161075	0.297289	-0.252394	-0.321554	-0.503077	-0.35454	-0.349705	0.0172992	-0.207657	0.0867955	0.0882378	0.071582	-0.276498	-0.0799283	0.50907	0.377041	0.654126	0.212237	0.203897	-0.223859	-0.0597344	-0.0525131	-0.0577093	-0.442271	0.12344	0.233914	-0.469906	-0.263429	-0.0848626	-0.124005	-0.35372	0.379709	-0.255994	-0.33842	-0.218125	-0.32193	-0.339357	-0.279579	-0.336147	-0.196254	-0.449845	0.00861414	-0.0569069	0.0852911
TCGA.A2.A0YH	0.352387	0.293472	-0.0679291	0.0926628	0.0598998	-0.115918	0.32989	-0.0918012	-0.294758	-0.374334	-0.562089	-0.457109	0.212159	-0.190938	0.536327	0.361706	-0.0501893	-0.202966	0.0153151	0.333138	0.186867	0.103496	0.237049	0.386895	-0.0807216	0.0590728	-0.175274	-0.217286	-0.370834	-0.172021	0.441656	0.224829	-0.157733	-0.189707	-0.0766462	-0.122452	0.047128	-0.209262	-0.450166	-0.064859	-0.195478	-0.426935	-0.300475	0.200692	-0.344217	-0.352652	-0.0319591	0.105544	0.073154
TCGA.A2.A0YI	-0.145312	0.0278353	0.156699	-0.426146	-0.192513	-0.223779	-0.176229	-0.151009	0.0613921	0.0845029	0.0622757	0.0668642	0.269787	-0.176073	0.047786	0.0313531	0.116515	-0.130882	-0.167743	-0.356112	-0.275683	-0.266578	-0.222547	-0.0854686	-0.252448	0.0279357	0.337749	0.313053	-0.35987	-0.0428078	0.12503	0.319757	0.220974	0.209494	0.263842	-0.399494	-0.500555	-0.508978	-0.172278	-0.358417	-0.344774	-0.126394	-0.185076	-0.178708	0.130969	-0.0551759	-0.570132	-0.154207	-0.36448
TCGA.A2.A0YJ	0.0155305	0.146717	-0.0582636	0.251147	0.544427	-0.115779	0.149727	-0.109162	-0.272073	-0.396329	-0.428526	-0.289234	-0.088787	0.452504	0.512594	0.0114944	0.0434226	-0.332681	-0.294055	0.328014	0.283873	0.290293	-0.0895844	0.20944	-0.297435	-0.099338	-0.0586424	0.0148168	0.0885522	0.279808	-0.0564868	-0.490592	-0.122884	0.112916	-0.0487084	0.114191	0.243545	0.243737	0.0357946	0.166734	0.363978	-0.434138	-0.21727	0.128383	-0.242949	-0.225657	-0.337234	0.0105284	0.152711
TCGA.A2.A0YK	0.110722	-0.276602	-0.169704	0.0363493	-0.194757	0.0503436	0.121511	0.103898	-0.061653	-0.381006	-0.517194	-0.256393	0.0227818	0.0169852	0.0366256	0.275789	-0.312319	-0.460186	-0.183344	-0.0807881	0.144585	0.247318	0.224831	-0.16864	-0.282191	-0.118632	0.609054	-0.0215794	-0.332555	-0.0532295	-0.402869	0.62635	0.137336	0.191772	0.163772	-0.378048	-0.0453464	-0.459463	-0.593577	-0.412717	-0.263733	-0.551056	-0.00917482	-0.545381	-0.245514	-0.53181	-0.450701	-0.138834	-0.338891
TCGA.A2.A0YL	-0.172717	-0.331755	-0.190071	-0.318425	-0.225838	-0.291413	-0.0659267	-0.201127	-0.0947105	-0.433571	-0.486397	-0.303253	0.103154	-0.196552	0.188117	-0.315298	-0.200493	-0.302095	-0.251057	0.121505	0.300143	0.345759	-0.0819659	-0.19078	-0.297752	0.20856	0.556351	-0.0998373	-0.411747	-0.258831	-0.485649	-0.221665	0.16209	0.245644	0.152344	-0.536312	-0.507372	-0.509281	-0.489142	-0.562081	-0.338319	-0.504675	-0.335086	-0.530561	-0.180685	-0.491753	-0.50694	-0.0136065	-0.181617
TCGA.A2.A0YM	0.135376	-0.212914	-0.332756	0.0449058	0.557414	0.0501208	-0.0828795	-0.108525	-0.105203	-0.456309	-0.586864	-0.541784	-0.205017	0.435849	0.506016	0.153777	-0.253668	-0.0742626	-0.0193132	0.403005	0.414343	0.440476	-0.37787	0.0446031	-0.268445	-0.331841	-0.36847	0.0572213	-0.551341	0.42578	0.0302773	0.0651393	-0.0555398	0.0522464	-0.0629749	-0.20115	-0.336974	0.0188962	-0.404296	-0.271455	0.172226	-0.392377	-0.309955	-0.49721	-0.424728	-0.568071	-0.42182	-0.00627517	0.101773
TCGA.A2.A0YT	0.400463	0.414033	-0.175149	0.00358397	-0.0644433	0.0168049	0.508777	0.0332454	-0.0501927	-0.478471	-0.391291	-0.0346716	0.216127	-0.484191	-0.160557	0.229028	-0.272667	-0.138202	0.000492565	0.483699	0.3456	0.415005	0.234252	0.35625	-0.180355	0.1028	0.00344537	-0.149265	-0.335521	0.123368	0.230984	-0.436843	-0.233188	-0.311292	-0.222148	-0.0398366	0.482152	0.139709	-0.444506	-0.0715695	-0.005954	-0.403717	-0.035326	0.45275	-0.270249	-0.46103	0.255893	-0.000883889	0.223172
TCGA.A2.A1FV	0.134463	-0.374561	-0.0558199	-0.399684	-0.268129	-0.173863	0.535421	-0.104435	-0.246017	-0.467188	-0.400739	-0.359465	-0.0984099	-0.465966	-0.232914	-0.187793	0.170499	0.060169	-0.200949	0.196033	0.343824	0.143176	0.0818683	-0.225324	-0.227833	-0.160673	0.670879	0.364932	-0.10008	-0.3463	-0.198814	-0.662026	-0.120592	-0.176439	-0.176512	-0.44101	-0.284586	-0.43724	-0.465345	-0.370323	-0.49778	-0.420021	-0.255042	-0.39728	-0.324091	-0.483294	-0.132084	0.00311407	-0.054719
TCGA.A2.A1FW	0.187984	-0.292852	-0.194596	-0.415135	-0.391069	-0.191122	0.314641	-0.0568953	-0.167561	-0.489772	-0.381262	-0.00514098	0.0707635	-0.48659	-0.247989	-0.420068	0.23923	-0.260862	0.0733429	0.454027	0.250896	0.435736	-0.0193479	-0.0561372	-0.292326	-0.180252	0.496175	0.0834004	-0.310633	-0.168689	0.253963	-0.488783	-0.243807	-0.286197	-0.275701	-0.335152	0.135213	-0.125122	-0.177754	-0.103269	-0.426869	-0.284287	-0.184111	0.131068	-0.403887	-0.341659	-0.252505	-0.0521643	0.0114978
TCGA.A2.A1FX	0.324494	0.295244	-0.474088	0.109291	-0.116613	-0.238822	0.540358	-0.156014	-0.410331	-0.440594	-0.584879	-0.50234	-0.195764	-0.60143	0.144289	0.126064	-0.401784	-0.235858	-0.107068	0.550178	0.292023	0.472532	0.398009	0.257442	-0.246012	0.00527715	0.700923	-0.00897031	-0.285583	-0.10986	-0.243334	-0.243755	-0.225151	-0.19207	-0.166068	-0.350379	-0.0127888	-0.337899	-0.461059	-0.203886	-0.272784	-0.563287	-0.228794	-0.240945	-0.391781	-0.490904	0.201496	0.0623111	0.218488
TCGA.A2.A1FZ	0.279749	0.108193	0.0323527	-0.399204	0.243314	0.0953276	0.492384	0.0393951	-0.0194514	-0.328269	-0.463202	-0.170632	0.189018	-0.200905	-0.0417049	-0.0218488	-0.0283198	0.0564007	-0.0809476	0.164103	0.359538	0.246798	0.448799	0.23642	-0.324051	0.189681	0.0309054	-0.181041	-0.356185	0.254586	-0.0590702	-0.37437	0.0541578	0.154245	0.0822122	-0.389665	-0.0818707	-0.442041	-0.468382	-0.179575	-0.136304	-0.434893	0.14679	-0.0127001	-0.211968	-0.421142	-0.334781	-0.0649396	-0.192208
TCGA.A2.A1G0	0.0505782	-0.136982	-0.269445	-0.176829	-0.304401	-0.258709	0.394603	0.0225041	-0.126631	-0.323284	-0.359594	-0.169608	-0.190473	-0.390031	-0.195116	-0.250962	0.206199	-0.107159	0.030588	-0.00395423	0.0844506	0.0627194	0.0225247	-0.113279	-0.219798	0.0753125	0.324396	-0.0320358	-0.0415684	-0.256214	-0.430054	-0.148411	0.129434	0.136759	0.105011	-0.406382	-0.428593	-0.520636	-0.373512	-0.276179	-0.477669	-0.347025	-0.0776798	-0.148741	0.069377	-0.295254	-0.532171	-0.17762	-0.309976
TCGA.A2.A1G1	0.0158575	-0.294818	-0.000252775	-0.107706	-0.467252	-0.184995	-0.37452	-0.135627	0.188011	-0.331554	-0.2664	-0.225962	-0.0191141	-0.0210363	-0.0169481	0.0351948	0.202935	-0.261849	-0.0437029	0.305832	0.318608	0.377041	0.0586416	0.0712584	-0.18595	-0.0402223	-0.286242	-0.00849608	-0.26277	0.383407	-0.18179	0.364133	0.174364	0.277804	0.180831	0.0299394	-0.158617	0.16077	-0.246464	-0.117161	-0.146748	-0.336114	-0.322468	0.488429	-0.334808	-0.107504	-0.298666	-0.0163218	-0.032217
TCGA.A2.A1G4	0.0361379	-0.226715	-0.169289	-0.0737108	-0.217466	-0.132358	0.41386	-0.0221668	-0.190241	-0.490958	-0.404637	-0.233642	-0.35705	-0.461933	0.111538	-0.329268	0.00652704	-0.0858363	0.100878	0.172324	0.326409	0.560169	0.124282	-0.00164643	-0.232136	-0.0205823	0.0923394	0.1291	-0.102632	-0.0281964	-0.0854763	-0.450446	-0.204942	-0.0928178	-0.223211	-0.292308	-0.184969	-0.24559	-0.24302	-0.316352	-0.258049	-0.334694	-0.175003	0.211254	-0.347907	-0.4845	-0.306216	-0.0532813	0.101684
TCGA.A2.A1G6	0.0726034	-0.147541	-0.335715	-0.307182	-0.358923	-0.245879	0.45384	-0.115284	-0.0702329	-0.422535	-0.462166	-0.454282	-0.0938393	-0.459358	-0.178751	-0.13185	-0.117949	-0.325313	-0.0882978	-0.0336175	0.358171	0.146094	0.314452	0.0579617	-0.362736	-0.206494	0.526216	-0.275867	-0.331392	-0.0477988	-0.510368	-0.373864	-0.169943	0.000164322	-0.140315	-0.473941	-0.297345	-0.552165	-0.485247	-0.494827	-0.515824	-0.493446	-0.00290592	-0.464997	-0.264426	-0.518239	-0.283682	-0.249558	-0.395812
TCGA.A2.A259	0.275294	-0.355789	-0.340361	-0.452106	0.0755858	-0.20594	0.378834	-0.0932632	-0.0547592	-0.381699	-0.40353	-0.263291	-0.10344	-0.454367	-0.321509	-0.203925	-0.109292	-0.0240722	-0.229286	0.445813	0.244021	0.486418	0.379434	-0.200366	-0.124832	0.173228	0.0504447	-0.289368	-0.219354	-0.0612622	-0.174197	-0.133985	0.0745297	0.175266	0.0606913	-0.389463	-0.246018	-0.246925	-0.560491	-0.147486	-0.354488	-0.556551	-0.105537	-0.0869415	-0.419801	-0.509385	-0.17306	0.0169404	-0.0685888
TCGA.A2.A25A	-0.0195774	-0.419262	-0.149179	-0.17667	-0.270047	-0.322813	0.155374	-0.273771	-0.192928	-0.530425	-0.715598	-0.636582	-0.175172	-0.25714	0.308792	0.0931839	-0.310193	-0.339994	-0.360774	-0.127988	0.284224	0.269255	0.353009	-0.161444	-0.312245	-0.0779046	0.522289	-0.169068	-0.266863	0.128896	0.0836507	-0.064949	0.0810647	0.0855383	0.150016	-0.589207	-0.511364	-0.474452	-0.462864	-0.584031	-0.474468	-0.524356	-0.347435	-0.769899	-0.286049	-0.526885	-0.429591	-0.0474639	-0.262502
TCGA.A2.A25B	0.116921	-0.270209	-0.0905929	-0.163881	-0.420702	-0.294406	0.294351	-0.144729	-0.217915	-0.50087	-0.454556	-0.196213	-0.120195	-0.462333	-0.255412	-0.463795	0.152632	-0.221115	-0.14048	0.02569	0.394432	0.481791	-0.000532111	-0.0220705	-0.0261349	-0.178079	-0.20714	-0.127762	-0.206875	0.212868	0.423424	-0.257838	0.17326	0.10341	0.151811	-0.345172	-0.106529	-0.404648	-0.273013	-0.289051	-0.364315	-0.328198	-0.299241	0.323889	-0.238141	-0.344791	0.00215079	0.0589775	0.150377
TCGA.A2.A25C	0.00486064	-0.00316299	-0.0258865	-0.26127	-0.206819	-0.221849	0.436441	-0.34628	-0.379772	-0.531249	-0.507905	-0.55732	0.0834656	-0.487865	-0.122404	-0.0983819	0.253413	-0.192078	-0.148121	0.351023	0.373616	0.398759	0.403021	-0.0316989	-0.341454	-0.351687	-0.0507124	-0.183063	-0.390854	0.0108121	0.112961	-0.12237	-0.105011	-0.114095	-0.0494433	-0.448368	-0.0860957	-0.440842	-0.393013	-0.325471	-0.230658	-0.46025	-0.404527	-0.239382	-0.157406	-0.410153	-0.386518	-0.0524164	-0.0145923
TCGA.A2.A25E	0.332944	0.162086	-0.0323182	-0.135163	0.0213155	-0.175864	0.645674	0.0427018	-0.13592	-0.489763	-0.504883	-0.193062	0.128392	-0.530436	0.0674046	0.206394	0.143824	-0.0969339	0.0470756	0.490064	0.363801	0.599208	0.206984	0.24575	-0.251743	-0.285014	-0.14283	0.159798	-0.374823	0.06001	-0.310082	-0.228252	-0.178684	-0.198046	-0.229364	-0.320779	-0.0153473	-0.299395	-0.460085	-0.238332	-0.32036	-0.41992	-0.0123296	0.42511	-0.242951	-0.508872	0.104652	0.0506868	0.214561
TCGA.A2.A25F	0.083424	0.000601131	0.00711068	0.148706	0.15481	-0.0563795	-0.475889	-0.287768	0.0763654	-0.146762	-0.389797	-0.209004	0.0835176	-0.00846577	0.414902	0.552625	0.0911542	-0.0447571	0.0360769	0.191695	0.119865	0.280236	-0.00881823	0.252603	-0.209176	0.25686	-0.390591	-0.0483491	-0.265156	0.233553	0.0915337	0.740257	0.156659	0.102079	0.179908	-0.182328	-0.0696993	-0.138022	-0.304083	-0.303909	-0.0943234	-0.274821	-0.115801	-0.268026	-0.145154	-0.282086	-0.420444	0.00917383	-0.102217
TCGA.A2.A3KC	-0.033405	0.292232	-0.334026	0.247679	-0.214291	-0.266514	0.292189	-0.040203	-0.296794	-0.459593	-0.611087	-0.557822	0.0617884	-0.34291	0.291771	0.25774	-0.0820468	-0.106414	-0.227169	-0.180525	-0.0153822	0.074442	0.221582	0.139713	-0.395012	-0.165262	0.580984	-0.249613	-0.550682	-0.110704	-0.536332	-0.262442	0.0884911	0.264831	0.158989	-0.540801	-0.596324	-0.682964	-0.552439	-0.514873	-0.368898	-0.579605	-0.351487	-0.492557	-0.169115	-0.487979	-0.520873	-0.0851852	-0.21336
TCGA.A2.A3KD	0.475564	0.282144	0.107283	0.14314	0.0565652	-0.0572912	0.394601	-0.138853	-0.201546	-0.364419	-0.457405	-0.126762	0.274724	-0.345723	0.287737	0.298274	0.250312	-0.259471	-0.0434033	-0.170591	-0.00299929	-0.338344	0.000772359	0.0297384	-0.171329	0.375052	-0.132813	-0.0602241	-0.152704	-0.189998	0.0135053	-0.56353	0.135962	0.172236	0.122839	-0.311202	-0.395954	-0.232713	-0.0923997	-0.0465783	-0.232894	-0.116299	-0.28571	0.132633	0.0754254	-0.287861	-0.561786	-0.073299	-0.245869
TCGA.A2.A3XS	0.38576	-0.171313	-0.512195	-0.0108268	0.488319	-0.00730625	0.106954	-0.0858057	-0.330094	-0.435146	-0.542243	-0.527944	-0.358837	0.348071	0.11248	0.0613405	-0.13754	-0.3763	-0.534636	0.158933	0.0688643	-0.00461555	0.278584	0.0159034	-0.241635	-0.476963	-0.540831	-0.0903718	-0.455139	0.261499	-0.266882	0.286983	-0.170441	-0.163408	-0.139818	-0.484383	0.0488355	-0.276797	-0.442624	-0.266454	0.0598153	-0.675343	-0.446767	-0.219224	-0.441571	-0.463947	0.240616	0.0719388	0.209318
TCGA.A2.A3XT	0.289485	0.0881146	-0.491708	0.20402	0.310696	0.0756523	0.0881965	-0.0426713	-0.290486	-0.458025	-0.530082	-0.470088	-0.115326	0.0325849	0.306631	0.263143	0.280517	-0.0356421	0.242874	0.576698	0.378214	0.428457	0.126702	0.259433	-0.186309	-0.0886425	-0.122029	-0.371497	-0.440524	0.11341	0.28864	0.252044	-0.335026	-0.394906	-0.258472	-0.0567164	0.415935	0.314373	-0.324808	0.206152	0.40193	-0.468767	0.0727508	-0.0706286	-0.16107	-0.350142	0.384908	0.202161	0.373752
TCGA.A2.A3XU	-0.280295	-0.617571	-0.357411	-0.366508	0.124256	0.170137	-0.0129412	0.167748	-0.055013	-0.121404	-0.0197804	0.00169643	-0.360636	0.244214	-0.208097	-0.260711	-0.0304942	-0.0607988	-0.0470588	0.45749	0.117659	0.162202	0.0708886	-0.282561	0.326532	0.0102531	-0.62372	-0.109133	-0.166276	0.15129	-0.29643	-0.429418	-0.321252	-0.258813	-0.309948	0.151877	-0.045805	0.374732	-0.0595987	0.218897	0.282223	0.0165604	-0.00655338	-0.161776	-0.202741	0.310406	0.609648	0.333779	0.419637
TCGA.A2.A3XV	0.0649176	-0.382842	-0.267509	0.137601	-0.33123	0.12316	0.166265	0.00562551	-0.243914	0.303465	0.444882	0.401204	-0.128613	-0.0790348	-0.404682	-0.324758	-0.0519144	0.201304	0.346256	0.00736926	-0.431529	-0.367659	0.00519474	0.00849525	0.334415	0.181649	-0.594552	-0.0244127	-0.209309	-0.233089	0.49596	-0.145012	-0.292435	-0.428097	-0.32354	-0.117235	0.180019	0.309892	0.431235	0.0373781	-0.0664378	0.186254	0.135945	0.575406	0.175528	0.539457	0.648269	0.112964	0.17445
TCGA.A2.A3XW	-0.488043	-0.310523	-0.352738	0.220726	-0.316163	0.137279	-0.313115	0.0927592	0.0518578	0.416886	0.232863	0.172111	-0.127823	-0.13383	-0.0899456	0.111692	-0.0622803	-0.179666	-0.22531	-0.418317	-0.499784	-0.558045	-0.0709805	-0.0166544	0.321035	0.114548	0.0078145	0.147952	-0.126948	-0.0429864	0.162738	0.198288	0.173856	0.107797	0.22338	-0.0101083	-0.377828	-0.0665886	-0.426659	-0.114381	-0.115626	0.0162021	-0.182719	-0.0148019	-0.109345	0.185469	0.268058	-0.15487	-0.128081
TCGA.A2.A3XX	-0.208685	-0.128981	-0.432779	-0.0242213	0.376719	0.0852209	-0.139495	0.0250076	-0.0806491	-0.222622	-0.249581	0.0123376	-0.381639	0.18529	0.0311493	-0.139163	-0.246463	-0.265736	-0.468577	0.478652	0.097988	0.360424	-0.0133247	0.0354931	-0.11395	-0.118555	-0.663047	-0.142679	-0.408398	0.326263	0.173331	0.19274	-0.154874	-0.0730614	-0.0740405	-0.0956871	0.16217	0.172921	-0.333287	-0.0190208	0.323095	-0.531587	-0.176984	0.186432	-0.411116	-0.421292	0.175679	0.135814	0.22326
TCGA.A2.A3XY	-0.0142258	-0.22778	-0.373643	-0.0888715	0.440907	0.142473	-0.212604	-0.048207	-0.285562	-0.459844	-0.511116	-0.135171	-0.337065	0.0774533	-0.189347	0.0786564	-0.00573577	-0.147355	-0.487455	0.474984	0.0543706	0.312135	-0.0022993	-0.201564	-0.158058	-0.177512	0.514287	-0.08133	-0.33741	0.22474	0.137615	0.524289	0.0603429	0.101549	0.160213	-0.186522	0.231962	-0.0828238	-0.543975	-0.109914	0.18529	-0.554005	-0.0728269	-0.276577	-0.406544	-0.413664	-0.0957092	0.204407	0.199694
TCGA.A2.A3XZ	0.165001	0.158903	-0.214791	-0.00761723	-0.0161059	-0.272453	-0.0277876	-0.15897	-0.324342	-0.351933	-0.363469	-0.0219839	-0.174804	-0.0222463	-0.183697	-0.0485378	0.0468529	-0.189881	0.0949775	0.425173	0.0421412	0.0880371	0.11249	0.0158759	-0.12142	-0.25255	-0.212027	-0.145416	-0.560094	0.187591	0.481616	0.55809	-0.275262	-0.279749	-0.276844	-0.153259	0.300995	-0.0251192	-0.404375	0.102471	0.26633	-0.569679	-0.120419	0.137463	-0.322047	-0.468761	0.0904443	0.0415113	0.221401
TCGA.A2.A3Y0	-0.136924	-0.287354	-0.496723	-0.210015	-0.0983731	0.0681767	-0.173198	-0.177059	-0.254453	-0.152046	-0.170853	0.139574	-0.193813	0.135686	-0.320992	-0.192014	0.0195049	-0.340964	0.127138	0.557711	0.0726874	0.381502	-0.0656144	-0.0842375	-0.00490354	-0.313708	-0.634402	-0.00733835	-0.350282	0.0668626	0.506777	0.492918	-0.434217	-0.394706	-0.353431	0.236681	0.212928	0.278945	-0.115265	0.200958	0.448981	-0.230501	-0.0601329	0.220201	-0.250191	-0.162148	0.444179	0.0621393	0.308379
TCGA.A2.A4RW	0.268551	0.145536	-0.104329	-0.0481871	0.221948	-0.254529	0.247052	-0.0553026	-0.23846	-0.343013	-0.447046	-0.354055	0.224731	-0.259836	-0.125409	-0.0885491	-0.0578499	-0.509902	-0.204981	-0.11203	-0.0202337	-0.15014	0.0592994	0.263496	-0.299336	0.321363	0.126022	0.00153369	-0.498107	-0.069734	0.175751	-0.113233	0.00910644	0.153995	0.0965909	-0.414528	-0.426509	-0.416817	-0.545358	-0.294894	-0.169207	-0.555925	-0.413359	-0.481781	-0.103084	-0.43443	-0.488264	-0.207473	-0.328936
TCGA.A2.A4RX	-0.287768	-0.567843	0.117005	-0.227358	0.203427	-0.0929398	-0.413927	-0.0864674	0.224351	-0.15992	-0.0443191	0.131495	-0.230562	0.231126	-0.105659	0.295359	-0.295261	-0.332558	-0.290752	-0.268441	-0.112473	0.0213079	-0.418745	-0.40759	-0.252711	0.308078	0.608	0.250854	-0.0973629	0.239004	-0.159193	0.298065	0.389214	0.490832	0.392878	-0.122743	-0.419515	-0.373549	-0.429602	-0.0515961	-0.234984	-0.248608	-0.302733	-0.177442	-0.108509	-0.146502	-0.629275	-0.206712	-0.340119
TCGA.A2.A4RY	-0.157239	-0.141462	-0.328191	-0.0203593	-0.285103	-0.00809034	0.0835671	0.0979559	-0.164675	-0.427657	-0.583005	-0.317407	-0.111622	-0.411212	0.279452	-0.0891244	-0.270512	-0.328296	-0.415449	-0.134774	0.202045	0.0181557	0.279821	-0.051595	-0.495509	-0.175117	0.617571	0.0585882	-0.457125	-0.260029	-0.278163	0.000148405	0.0513772	0.158813	0.0922087	-0.508017	-0.433865	-0.373059	-0.614277	-0.294768	-0.190632	-0.591727	-0.173709	-0.616755	-0.351215	-0.545443	-0.586158	-0.0781201	-0.264537
TCGA.A2.A4S0	0.167219	0.679737	-0.156359	0.386386	-0.0484058	-0.0980806	0.355311	-0.121046	-0.0661509	-0.0645426	-0.0585365	-0.0172473	0.0688496	-0.417135	0.157918	0.391605	0.154793	-0.221656	0.051801	-0.00394534	-0.336531	-0.0473328	-0.095008	0.26185	-0.174498	0.0958016	0.30451	0.279147	0.130013	-0.529208	0.0302347	-0.554505	-0.093412	-0.101738	-0.0861721	-0.228578	-0.263588	-0.0575113	0.0645964	0.0109095	-0.0696404	-0.297136	-0.0310805	-0.136841	0.143595	-0.110489	-0.399096	-0.129851	-0.296488
TCGA.A2.A4S1	-0.485665	-0.127689	0.274927	0.257813	0.0532373	0.0111337	-0.579024	-0.0832471	0.281775	0.437199	0.518497	0.445489	-0.0580386	0.202464	0.335826	0.159737	-0.341897	-0.0224514	-0.202273	-0.662336	-0.522677	-0.518876	-0.585543	-0.180235	-0.022374	0.349482	-0.386848	0.448553	-0.123512	-0.0802978	0.367166	0.149978	0.274918	0.200084	0.319225	-0.13095	-0.696565	-0.388458	0.371389	-0.284021	-0.19529	0.337493	-0.358379	-0.395071	0.148739	0.470467	-0.537421	-0.25249	-0.450928
TCGA.A2.A4S2	-0.130551	0.0552736	-0.169111	0.100023	-0.0839207	-0.197236	0.263013	-0.0122406	-0.345266	-0.390034	-0.546942	-0.522268	-0.0120427	-0.460382	0.248539	0.341024	-0.124136	-0.0106096	-0.304477	0.246969	-0.115709	0.188272	0.43313	0.191125	-0.330393	0.160588	0.317797	-0.137555	-0.523198	-0.199397	0.211151	0.282428	-0.238749	-0.0883229	-0.132246	-0.44615	-0.380434	-0.337814	-0.549904	-0.153091	-0.274729	-0.562803	-0.258285	-0.424952	0.0954292	-0.472322	-0.340604	-0.0853067	-0.0997054
TCGA.A2.A4S3	0.153991	0.0427497	-0.420847	-0.448681	-0.269585	-0.0244388	0.090374	0.024905	-0.390315	-0.375716	-0.404234	-0.025931	0.0229077	-0.472332	-0.33135	-0.411907	0.209267	-0.254109	-0.0720317	0.404991	0.264867	0.347813	0.146395	0.271981	-0.042493	-0.341292	-0.288876	-0.136343	-0.422038	-0.0753001	0.371742	0.304609	-0.28469	-0.25605	-0.262132	-0.273476	0.16089	0.00304137	0.109691	0.107162	0.0167796	-0.173369	0.0135888	-0.0391578	-0.214159	-0.358224	0.439236	0.0861534	0.270763
TCGA.A7.A0CD	0.26241	0.25494	-0.0243822	-0.303331	-0.218036	-0.14133	0.480972	-0.124142	-0.321183	-0.378376	-0.348134	-0.036267	0.241718	-0.547946	-0.25061	-0.385387	0.0404074	-0.172053	0.0351097	0.21416	0.0783222	0.468243	-0.00749174	0.0641421	-0.0757575	0.249113	0.199109	-0.0350219	-0.0653372	-0.290216	-0.21566	-0.628133	-0.150616	-0.084681	-0.0963238	-0.367595	-0.115849	-0.366939	-0.291821	-0.211007	-0.333719	-0.230374	-0.0450164	0.382809	-0.34939	-0.414685	0.0197268	-0.0372799	0.106624
TCGA.A7.A0CE	0.164187	0.351328	-0.0204655	0.169603	0.173875	-0.0644597	0.241775	0.00966587	0.0588549	-0.314987	-0.333247	-0.146812	-0.225376	0.137841	0.43922	0.0522612	-0.164697	-0.0558922	-0.349363	0.668825	0.493534	0.353099	0.137466	0.205226	0.29622	0.0501511	-0.00715829	-0.0731245	-0.306611	0.300803	-0.445728	-0.476857	-0.0731516	0.018009	-0.112872	0.101971	0.492824	0.0858782	-0.341604	-0.0778274	0.412739	-0.446608	0.12619	-0.345846	-0.516403	-0.433999	0.402916	0.171823	0.204197
TCGA.A7.A0CG	0.293394	0.153722	0.257892	-0.26665	0.237903	-0.022155	0.0857632	-0.140333	0.116388	-0.122879	-0.250745	-0.0505857	0.200433	0.120141	0.0121224	0.0543696	0.146354	-0.188518	-0.175287	-0.200402	-0.0582946	-0.0328698	0.0947169	-0.00762705	-0.251277	0.257887	0.0836068	0.0774303	-0.0250235	-0.120425	-0.309673	0.37802	0.133876	0.155288	0.220957	-0.232032	0.146214	-0.274528	-0.134811	-0.223576	-0.194879	-0.347161	-0.00452347	-0.426916	0.127329	-0.279859	-0.395514	-0.0167503	-0.341103
TCGA.A7.A0CH	0.157945	0.0926526	-0.102483	-0.245685	-0.0606222	-0.327446	0.395274	-0.175171	-0.163745	-0.417752	-0.371055	-0.0611079	0.141616	-0.403162	-0.182467	-0.194803	0.242181	-0.212047	-0.0276802	0.272182	0.228538	0.307275	0.283007	-0.0579207	-0.154847	-0.311616	0.400338	-0.189646	-0.289008	-0.257821	-0.12709	-0.648447	-0.0585003	-0.0706133	-0.0790597	-0.322228	0.0575636	-0.359515	-0.130057	-0.277578	-0.352073	-0.145691	0.023407	-0.103418	0.135429	-0.336732	-0.0445494	-0.0744345	-0.0595386
TCGA.A7.A0CJ	0.146716	-0.091631	-0.344646	-0.397881	-0.312968	-0.0838991	0.284514	-0.0247273	-0.281496	-0.463213	-0.398385	-0.340508	-0.0280768	-0.397113	-0.0162055	-0.504428	0.0498031	-0.157787	-0.0304201	0.556671	0.397322	0.436239	0.213148	0.0615309	-0.272737	-0.251687	-0.110791	-0.332254	-0.379043	-0.0532835	-0.41385	-0.314445	-0.255404	-0.282668	-0.307914	-0.0950073	0.181922	-0.0757757	-0.459145	-0.0699913	-0.0283131	-0.312136	0.0505753	-0.117593	-0.258368	-0.488713	0.325728	0.188515	0.375336
TCGA.A7.A0D9	0.0295164	0.118497	-0.206524	-0.0422311	-0.162661	-0.0407007	-0.00450776	-0.0915285	-0.346028	-0.504573	-0.396532	-0.517275	-0.159819	-0.41494	-0.0254244	-0.265908	-0.116359	-0.294409	-0.120799	0.433603	0.30466	0.255845	0.214678	-0.0374666	-0.241728	-0.28241	0.614124	0.289268	-0.420707	-0.0925465	-0.523565	-0.681343	-0.0763359	-0.166166	0.000352536	-0.224243	0.249667	-0.326652	-0.293063	-0.284681	-0.377899	-0.258201	-0.347673	-0.221588	-0.293933	-0.301284	-0.224635	-0.114984	-0.238685
TCGA.A7.A0DA	0.273464	-0.342429	-0.422359	-0.306988	0.409872	-0.0592447	-0.101741	-0.0571915	-0.257017	-0.392619	-0.512843	-0.298285	-0.38433	0.399765	0.0663561	-0.136923	-0.0287549	-0.286274	-0.245975	-0.109764	0.169353	-0.336779	-0.0904923	-0.251358	-0.203176	-0.600131	0.101858	-0.0629415	-0.196556	0.276049	-0.351719	-0.498955	0.115589	0.233246	0.142938	-0.209665	0.100638	-0.437166	-0.401582	-0.158428	-0.234815	-0.484069	-0.41017	0.214859	-0.449223	-0.379225	-0.352946	-0.0888327	-0.0342552
TCGA.A7.A0DB	0.475708	0.388233	0.136522	0.0357916	-0.0446838	0.00406887	0.257124	-0.183264	-0.196874	-0.347021	-0.477494	-0.325727	0.0437681	-0.237855	0.170506	0.314834	0.230262	-0.373499	0.176471	0.142015	0.0232308	-0.216566	0.277522	0.39284	-0.0347768	0.312359	-0.229931	-0.276487	-0.0891997	-0.000713795	-0.177041	-0.554656	0.0102197	0.0264328	0.0124732	-0.0733834	0.146234	-0.194171	0.0617574	-0.0510864	-0.216171	-0.0323421	0.26531	0.0678059	0.0924302	-0.288411	0.251004	-0.0245597	-0.191453
TCGA.A7.A0DC	0.190493	-0.324134	-0.3155	-0.529475	-0.198672	-0.106659	0.512631	-0.0596605	-0.312886	-0.384788	-0.300513	-0.207639	-0.0901651	-0.523257	-0.260694	-0.452751	0.0401547	-0.287683	0.114537	0.511693	0.351539	0.285465	0.178034	-0.129712	-0.0468084	-0.100851	0.28705	0.18369	-0.187239	-0.252979	-0.424177	-0.716418	-0.339053	-0.323577	-0.302286	-0.119099	-0.0138491	-0.176558	-0.308021	0.0208001	-0.266099	-0.124316	0.0390541	0.0863081	-0.282246	-0.357272	0.0349628	-0.0161141	0.00592189
TCGA.A7.A13D	-0.263405	-0.51732	0.388746	-0.279118	0.382986	-0.102502	-0.559123	-0.280429	0.103444	-0.168088	0.168005	0.162705	-0.321726	0.470552	0.298887	-0.0632057	-0.115808	-0.226628	-0.1303	-0.191495	-0.242484	-0.13759	-0.497673	-0.352396	0.0741948	0.142486	-0.122816	0.23636	-0.037652	0.288068	-0.133251	-0.430366	0.415802	0.456586	0.41223	0.172396	-0.329945	0.318342	0.0843646	0.259178	0.346094	-0.0891664	-0.273767	-0.184635	-0.0245176	0.264902	-0.443082	0.0820985	-0.0685363
TCGA.A7.A13E	0.0683931	0.0646934	-0.493978	-0.0987143	0.0958266	-0.0688101	0.42101	0.121711	-0.0847308	-0.480822	-0.443602	-0.268221	-0.120395	0.186642	0.194111	-0.0428189	-0.0679879	0.0467509	-0.400433	0.535465	0.293981	0.217356	0.341037	0.0177413	-0.309915	-0.48611	0.025522	-0.160444	-0.35744	0.16938	-0.441919	-0.48869	-0.285478	-0.13014	-0.243311	-0.029966	0.153854	0.0954809	-0.410535	0.119793	0.419814	-0.459735	-0.249651	-0.0930549	-0.412437	-0.510899	-0.0461358	0.0577654	0.210594
TCGA.A7.A13F	0.487644	0.62706	0.0106131	0.533583	0.263608	-0.0190787	0.447025	0.005739	-0.189683	-0.234084	-0.500255	-0.458614	0.228094	-0.31066	0.367512	0.347566	0.285171	-0.22045	0.227339	0.530141	0.228352	0.459401	-0.0216935	0.402328	0.0775047	0.132794	0.166673	-0.118215	0.0312348	0.0538877	0.014373	-0.537004	-0.0171952	0.115956	0.0487022	-0.182434	0.328177	-0.207312	-0.235027	-0.130775	0.0264072	-0.0208678	0.162834	0.18618	0.146674	-0.147949	0.358264	0.148441	0.210556
TCGA.A7.A13G	0.427071	0.46506	-0.19714	-0.231771	0.216497	-0.1678	0.465095	-0.0806982	-0.2766	-0.406982	-0.393813	-0.252844	0.240844	-0.424863	-0.384131	-0.0896386	0.0443313	-0.413467	-0.196472	0.173951	0.204476	0.361959	0.219293	-0.0545807	-0.0600164	-0.322226	0.484027	-0.153845	-0.140489	-0.333487	-0.142045	-0.618868	-0.0394561	-0.143054	-0.101787	-0.32634	0.00396049	-0.345097	-0.248979	-0.201502	-0.351654	-0.327417	-0.012421	-0.0914834	-0.111991	-0.381899	-0.200047	-0.141891	-0.187458
TCGA.A7.A13H	-0.0293052	0.397777	-0.27324	0.131249	0.0885472	-0.0661583	0.387326	0.202707	-0.0524195	-0.336373	-0.48496	-0.139603	-0.140713	-0.35551	0.264777	0.239657	0.196229	-0.173708	-0.0579637	-0.00122405	0.121314	0.0994251	0.44659	0.420234	-0.429012	-0.0397704	0.577767	-0.268182	-0.613371	-0.0574856	-0.244085	0.274041	-0.116187	-0.127584	0.0629494	-0.406969	-0.336642	-0.173773	-0.617599	-0.164229	-0.152385	-0.584272	-0.16315	-0.0245182	-0.336223	-0.55881	-0.386206	-0.111743	-0.213899
TCGA.A7.A26E	-0.116755	-0.274349	0.0339047	-0.334381	-0.148729	-0.137229	0.34476	-0.105141	-0.196682	-0.438328	-0.4346	-0.287168	0.2124	-0.506779	-0.316448	-0.0649782	-0.0760779	-0.326964	0.00116068	0.00980696	0.278314	0.122979	0.0706663	-0.167666	-0.271933	-0.231175	0.175605	0.102567	-0.168471	-0.197729	-0.345069	-0.614087	0.122254	0.250719	0.125522	-0.416797	-0.355796	-0.267151	-0.214063	-0.370784	-0.362055	-0.0578463	-0.114664	-0.388947	0.223514	-0.239065	-0.361461	-0.17082	-0.277561
TCGA.A7.A26F	0.158407	-0.375894	0.330481	-0.0811347	0.142697	-0.0985475	-0.407301	-0.187986	0.102489	-0.297387	-0.144442	0.0446322	0.0534452	0.268616	0.021004	-0.187416	0.0499421	-0.185339	-0.121547	-0.00626855	0.215865	0.419421	-0.0790908	-0.0887947	-0.366031	0.355979	-0.160537	-0.062889	-0.352638	0.181798	-0.226492	0.227767	0.25152	0.250286	0.215197	-0.143148	-0.283244	-0.301359	0.0219555	-0.208404	-0.0264458	0.0871575	-0.196407	0.483278	-0.17899	0.158846	-0.588018	-0.095604	-0.171337
TCGA.A7.A26G	0.260629	-0.0552213	0.302252	0.0309035	0.261024	-0.0353095	-0.0866465	-0.0992193	0.0554756	-0.135243	-0.0801467	0.131632	0.126062	0.230549	0.173887	0.24677	-0.345726	-0.1548	-0.0478207	-0.198675	-0.0253532	0.051183	-0.332911	0.034947	-0.313292	0.13654	-0.109392	0.209843	-0.181118	-0.105678	-0.0710336	0.316026	0.281699	0.266162	0.286367	-0.301813	-0.483726	-0.374194	0.139047	-0.444254	-0.196754	-0.120701	-0.2643	-0.103036	0.150373	0.223908	-0.600472	-0.0753661	-0.331793
TCGA.A7.A26H	0.0903097	-0.00342743	-0.0804179	-0.347856	-0.0969161	-0.242541	0.240541	-0.25442	-0.117247	-0.30672	-0.253603	0.0657375	0.0388285	-0.375661	-0.0479355	-0.0475058	0.0346194	-0.142805	-0.102857	-0.10691	0.0531767	0.507574	-0.0924384	-0.0486745	-0.259317	-0.00867453	-0.12536	-0.0236198	-0.218789	-0.193352	0.148404	-0.245858	0.198721	0.16482	0.231404	-0.40579	-0.460554	-0.455958	-0.318474	-0.27611	-0.405255	-0.172719	-0.152615	-0.046582	-0.073722	-0.170364	-0.49367	-0.0463507	-0.255481
TCGA.A7.A26I	0.0137266	-0.159683	-0.112991	-0.29512	-0.23605	0.0586729	-0.27328	-0.269952	-0.289934	-0.395044	-0.360497	-0.190858	0.0730091	-0.00212867	0.0990732	-0.22846	0.313342	-0.175293	-0.444992	0.0538249	0.31148	0.279689	0.0217497	-0.116542	-0.233705	-0.079549	-0.426395	-0.233586	-0.378048	0.414002	0.0497865	-0.463376	0.0427679	0.232428	0.0592853	-0.16646	-0.00871242	-0.0224725	-0.383816	-0.380034	-0.0355596	-0.463366	-0.232855	0.126637	-0.251633	-0.227445	-0.3089	-0.0796498	-0.0735945
TCGA.A7.A26J	0.0178446	0.0989488	-0.135056	0.0956581	-0.341793	-0.177808	0.450896	-0.0860173	-0.227634	-0.56527	-0.546992	-0.384243	0.0414615	-0.513359	-0.0711462	0.0408204	0.00578549	-0.10875	-0.157007	0.200667	0.339351	0.521491	0.197656	0.0242704	-0.377871	-0.0805762	0.168253	0.0359014	-0.458623	-0.234838	-0.0493546	-0.484898	0.0346747	0.0899562	0.03865	-0.424995	-0.235077	-0.475215	-0.396552	-0.414848	-0.500183	-0.349331	-0.224146	-0.24805	-0.146811	-0.433132	-0.440145	-0.0577226	-0.12299
TCGA.A7.A2KD	0.201192	-0.342422	0.0765338	-0.0814459	-0.202647	-0.209056	0.321043	-0.273209	-0.501253	-0.46027	-0.529663	-0.360799	-0.0822169	-0.439126	0.433537	-0.167269	-0.0535577	-0.150987	0.146972	-0.072671	0.312092	0.523688	0.0981257	-0.0412494	-0.320621	-0.402151	0.125968	-0.21333	-0.539622	-0.0963112	-0.285885	0.139063	-0.0666239	-0.0713828	-0.0483095	-0.510006	-0.507893	-0.571387	-0.470586	-0.520024	-0.390771	-0.478801	-0.407014	0.105173	-0.42212	-0.423805	-0.429354	-0.102249	-0.00163875
TCGA.A7.A3IY	0.41249	0.3618	-0.102477	0.128562	0.139645	-0.18927	0.26174	-0.152257	0.000497578	-0.255019	-0.492324	-0.177943	-0.0822643	-0.3532	0.385271	0.425907	0.353332	-0.134713	0.0631824	0.290317	0.0786379	0.19879	0.430494	0.355292	0.142036	-0.274115	-0.123886	-0.41547	-0.23027	0.236881	0.536678	-0.402215	0.0236463	-0.0111418	-0.0539484	-0.336098	-0.105958	-0.37977	-0.442898	0.161063	0.197689	-0.544839	-0.137224	0.020895	-0.00564828	-0.511015	0.411224	-0.0417229	0.149119
TCGA.A7.A3IZ	-0.0235996	0.201587	-0.221827	-0.0154083	-0.401102	-0.278903	0.484059	-0.140698	-0.255851	-0.240728	-0.223654	-0.153494	-0.00534741	-0.499361	-0.247028	-0.168727	-0.125872	-0.194429	0.236053	-0.0806503	-0.1919	0.0454248	-0.250532	-0.147868	-0.249896	0.153911	0.532942	-0.0947094	-0.101143	-0.428593	-0.222939	-0.575412	-0.111953	0.00128983	-0.0217624	-0.401965	-0.297739	-0.520161	-0.109516	-0.385356	-0.460157	-0.0638867	-0.267105	-0.245048	-0.382964	-0.298849	-0.338638	-0.12733	-0.137323
TCGA.A7.A3J0	-0.291334	-0.487454	0.123636	-0.363398	-0.113831	-0.0477908	-0.490898	-0.188512	0.182567	0.158792	0.400416	0.358319	-0.102908	0.258373	0.290295	-0.0249304	0.0497702	-0.131529	-0.0721372	-0.536343	-0.528787	-0.398401	-0.308999	-0.400713	-0.0749274	0.257524	-0.268483	0.486174	-0.134782	-0.392528	0.358829	-0.0602087	0.0742302	0.0622599	0.132571	-0.338401	-0.504517	-0.388672	0.271407	-0.320127	-0.462784	0.207804	-0.431301	-0.304827	0.211311	0.43271	-0.565096	-0.209725	-0.410644
TCGA.A7.A3J1	0.00334452	0.251679	-0.280075	-0.0446871	-0.284127	0.114413	0.314284	-0.0536698	-0.363667	-0.402224	-0.617568	-0.448132	0.0408481	-0.405775	0.217695	0.152214	-0.241486	-0.0263112	-0.365253	-0.078959	-0.16	0.359615	0.381209	0.174553	-0.324935	-0.0910666	0.198074	0.00913403	-0.334362	-0.199609	-0.27539	0.471286	-0.0126812	0.0415832	0.12605	-0.496787	-0.258912	-0.428689	-0.426902	-0.367153	-0.277754	-0.427478	-0.101761	-0.519825	-0.286404	-0.486434	-0.381817	-0.133102	-0.226058
TCGA.A7.A3RF	0.326045	0.380321	-0.14406	0.159563	0.00245742	-0.174232	0.255221	-0.0777706	-0.229648	-0.265134	-0.309124	-0.0150944	-0.124022	-0.528388	-0.301768	0.135169	0.211867	-0.0661399	0.019411	0.401366	-0.183514	-0.0943705	0.145557	0.151815	0.262155	0.0840153	0.190654	0.183982	0.0817402	-0.383	0.100246	-0.667795	-0.137577	-0.20226	-0.136651	0.232269	0.429862	0.299855	-0.192917	0.466886	-0.012816	-0.364081	-0.00804993	0.160003	-0.0974807	-0.277309	0.470566	0.0721794	0.0592702
TCGA.A7.A425	0.0549751	0.1707	-0.350109	0.0422086	-0.155473	0.0408523	0.205624	0.0882382	-0.243079	-0.213223	-0.437652	-0.213907	-0.213922	-0.419671	-0.310862	0.160038	-0.0654707	-0.44878	-0.065503	0.147276	0.0114512	0.134808	0.413	0.192744	-0.0660699	-0.162418	0.137244	-0.142675	-0.361903	0.0203588	0.125815	-0.342096	-0.177975	-0.181624	-0.121036	-0.299881	0.0770987	-0.347378	-0.540392	-0.0498569	-0.226455	-0.53091	-0.00281857	-0.568263	-0.241702	-0.419128	0.318975	-0.00884748	0.0973661
TCGA.A7.A426	-0.0362531	-0.0507316	-0.47615	-0.0759086	-0.338496	-0.0862595	0.146532	0.124208	-0.23782	-0.322656	-0.532257	-0.344822	-0.324416	-0.45463	-0.106049	-0.105294	-0.410154	-0.350285	-0.394305	-0.0998605	-0.156259	0.173763	0.372024	0.0143668	-0.300669	0.117913	0.276209	-0.2014	-0.518424	-0.345483	0.0259024	-0.20332	-0.0421427	0.0182776	0.0511292	-0.444502	-0.384965	-0.389201	-0.614614	-0.396656	-0.303218	-0.646569	-0.102493	-0.57813	-0.301339	-0.556576	-0.114129	-0.0667689	0.0179512
TCGA.A7.A4SA	-0.161883	-0.143376	-0.248888	0.0866192	-0.122027	-0.0410181	0.312371	0.0163544	-0.335548	-0.32708	-0.501916	-0.499905	-0.0929353	-0.437423	-0.207477	0.327934	0.0770817	-0.345353	-0.215842	-0.475152	-0.0580279	-0.0717498	0.0234063	0.107942	-0.164618	-0.0855963	0.0645192	-0.10033	-0.458978	-0.0402951	-0.338084	0.448558	0.0215201	0.0550599	0.106202	-0.207666	-0.221433	-0.301548	-0.484818	-0.0103754	0.0536046	-0.651266	-0.26719	-0.256196	-0.378751	-0.498063	-0.253386	-0.171633	-0.191758
TCGA.A7.A4SB	-0.135032	0.0644502	-0.2848	0.105727	-0.163481	-0.0712	0.199238	0.149608	-0.158984	-0.39694	-0.361366	-0.220935	-0.00154882	-0.502041	-0.139442	-0.489914	-0.284123	-0.259247	-0.491115	-0.208683	0.0612645	-0.441618	0.336108	-0.0891027	-0.157012	-0.457151	0.645995	0.241553	-0.394771	-0.0865749	-0.463252	-0.634785	0.089568	0.107847	0.0756346	-0.480748	-0.591923	-0.361221	-0.458773	-0.416837	-0.453901	-0.489814	-0.320427	0.184791	-0.251229	-0.402603	-0.195243	-0.189652	-0.0586378
TCGA.A7.A4SC	0.232394	0.397165	0.148403	-0.000639435	0.267562	0.126977	0.179361	0.0602716	-0.145368	-0.314304	-0.33177	-0.209283	0.250537	-0.0714521	-0.182097	0.220325	0.250159	-0.208643	-0.345093	-0.431809	-0.322456	-0.0811142	0.0897062	-0.0225352	-0.233812	0.150924	0.511421	0.125031	-0.357077	-0.303903	-0.469884	-0.15277	0.111935	0.130579	0.218978	-0.440476	-0.339972	-0.526456	-0.359084	-0.272881	-0.248411	-0.448344	-0.240704	-0.31255	0.0211497	-0.338797	-0.597087	-0.212732	-0.43259
TCGA.A7.A4SD	-0.0203893	-0.30074	0.102573	-0.0500739	0.407438	-0.234117	-0.296078	-0.287212	-0.304463	-0.38656	-0.503117	-0.462642	-0.332595	0.214042	0.0731318	-0.0190905	0.0357744	-0.10527	0.186212	0.292751	0.257499	0.197703	0.0273	-0.123534	-0.318201	-0.201967	-0.176178	0.388825	-0.362044	0.342536	0.413791	0.585507	0.0808663	0.261589	0.0484816	0.103696	0.058567	0.0476393	-0.38655	0.10667	0.0297917	-0.19684	-0.294027	-0.158867	-0.26738	-0.261458	-0.466722	-0.118015	-0.0194748
TCGA.A7.A4SE	-0.00563347	-0.468538	-0.174994	-0.1761	0.424182	-0.0610172	-0.288959	-0.297304	-0.310906	-0.35977	-0.473226	-0.308484	-0.260121	0.395896	0.0372023	-0.130973	-0.0487438	-0.439469	-0.600616	0.243289	0.0713873	-0.418806	-0.118655	-0.312863	-0.24435	-0.234402	-0.240417	0.0391796	-0.513398	0.29891	-0.430198	-0.204928	0.29906	0.305687	0.323597	-0.241279	-0.538365	-0.195171	-0.456457	-0.378967	-0.227514	-0.38263	-0.472769	-0.036277	-0.47822	-0.393212	-0.566287	-0.107191	-0.175866
TCGA.A7.A4SF	0.0682874	0.41602	-0.255131	-0.0404291	-0.0536813	0.00453912	0.435715	0.109939	-0.222639	-0.292419	-0.391375	-0.0759406	0.10518	-0.486962	-0.0949154	-0.263231	-0.0402119	-0.139802	0.0294241	0.510108	0.328269	0.204052	0.214276	0.364614	-0.314305	-0.322389	-0.189792	-0.0383035	-0.3883	0.0785901	-0.203064	-0.144803	-0.314537	-0.371171	-0.364968	0.0367439	0.31121	-0.0428172	-0.300494	0.0571853	0.185303	-0.324134	0.0943309	0.430783	-0.256591	-0.334338	0.229841	-0.00273193	0.268655
TCGA.A7.A56D	-0.1425	0.15012	-0.0977184	0.043814	0.232474	0.0216573	0.134557	0.102092	-0.212247	0.238719	0.133034	-0.00249476	-0.109725	0.238522	0.256955	0.483927	0.0979124	0.0234581	0.128012	-0.3597	-0.487879	-0.411608	0.00654176	0.176144	0.369468	0.0302476	-0.52019	0.00964805	-0.342232	0.0277733	0.405998	-0.0450098	0.115143	-0.0407786	0.143947	0.209009	-0.275189	0.254367	0.0155394	0.302069	0.1311	-0.193421	-0.278249	-0.300967	-0.113524	0.258746	0.555566	0.147387	0.153152
TCGA.A7.A5ZV	0.188846	0.54284	0.0707994	0.341149	0.62311	-0.122121	-0.00293058	-0.0373977	-0.0166552	-0.0812113	-0.260727	-0.21878	-0.100399	0.148357	0.121051	0.531262	-0.00592405	-0.12167	-0.491987	-0.0753007	0.0898371	-0.485397	0.0492883	0.269369	0.0524552	0.116279	-0.0181263	0.235024	0.215895	0.0469799	0.297533	-0.318577	-0.0166564	-0.0360456	0.0414146	0.0881202	0.0491642	0.0997993	0.219804	0.0788436	0.104004	-0.10938	-0.310642	0.0195806	0.121089	-0.139338	0.194524	0.0829136	0.0490681
TCGA.A7.A5ZW	-0.166776	-0.270084	-0.00706763	-0.217141	0.361562	-0.256122	0.171649	-0.212206	-0.132583	-0.0874128	-0.22337	-0.168858	0.281201	-0.279976	0.00441373	-0.120928	0.501127	-0.149299	0.171654	-0.368834	-0.0624591	-0.033034	0.245983	-0.252385	-0.263451	0.0424036	0.00561652	-0.324673	-0.345401	0.00902855	-0.343561	-0.251578	0.190799	0.173596	0.179633	-0.437094	-0.392131	-0.419878	-0.131122	-0.486175	-0.400864	-0.00533556	0.0516694	-0.17148	0.334974	-0.131723	-0.459149	-0.118317	-0.329987
TCGA.A7.A5ZX	-0.182677	-0.225291	-0.405992	-0.254925	-0.328605	-0.147315	0.332617	0.102536	0.0477496	-0.275925	-0.435984	-0.159224	-0.00576235	-0.485118	0.0737981	-0.235506	0.239679	-0.26805	-0.319354	-0.301074	0.138258	0.0263534	0.339188	-0.0557117	-0.281525	-0.272756	0.363219	-0.36773	-0.503674	-0.251731	-0.555091	-0.616815	0.0451715	0.132967	0.0385655	-0.555926	-0.358649	-0.316309	-0.456148	-0.34526	-0.244453	-0.495552	-0.108277	-0.546	-0.164673	-0.510508	-0.262633	-0.122928	-0.212997
TCGA.A7.A6VV	-0.0664121	-0.596284	-0.149622	-0.237575	0.455092	0.0972926	-0.485416	-0.221507	-0.0628882	-0.272219	-0.363145	-0.169349	-0.331815	0.211409	0.161593	-0.123293	-0.207829	-0.229017	0.139294	-0.341047	-0.0710047	-0.0633798	-0.413607	-0.164091	-0.108229	-0.218846	0.229979	0.320739	-0.313509	0.377474	0.586214	0.0977752	0.258668	0.343512	0.303727	0.0822705	-0.132025	-0.295785	-0.251756	-0.157026	0.101753	0.0490158	-0.269446	-0.187325	-0.390071	-0.192556	-0.358731	0.0378879	0.0193323
TCGA.A7.A6VW	-0.0791594	-0.284661	-0.280396	-0.231734	-0.0760391	-0.0691582	-0.330187	-0.0274022	-0.31111	-0.168314	-0.404019	-0.357923	-0.392095	0.401107	0.209353	-0.0771065	0.231073	-0.00544121	0.314146	0.294952	-0.0165144	0.0921035	-0.0122263	-0.0116737	0.296338	-0.172141	-0.585869	-0.182368	-0.181483	0.168818	0.0138856	-0.192811	-0.205522	-0.28493	-0.183861	0.0122034	0.256658	0.229394	-0.203613	-0.186286	0.122048	-0.316233	-0.300198	-0.289545	-0.309885	0.162542	0.524508	0.178261	0.362586
TCGA.A7.A6VX	0.170164	-0.0284779	0.0279432	-0.0328486	0.25709	-0.309802	0.0210827	-0.168289	-0.399286	-0.187745	-0.216532	-0.164851	0.00586347	-0.329198	-0.0609067	0.272399	-0.0729638	-0.223851	-0.010033	-0.298149	0.182958	-0.0748277	-0.0991151	0.0428862	-0.13825	-0.0143078	-0.0637256	0.259704	-0.246321	-0.266255	0.115974	-0.577661	-0.134922	-0.0952503	-0.140246	-0.260588	-0.381674	-0.229544	-0.296762	-0.168534	-0.470962	-0.165311	-0.213515	-0.0672957	0.265546	-0.0364104	-0.261688	-0.0455447	-0.175801
TCGA.A7.A6VY	0.0257675	0.227268	-0.421566	0.0333868	0.244293	-0.213991	-0.270169	-0.179806	-0.385072	-0.392391	-0.521326	-0.380836	-0.279951	0.234929	-0.0191694	0.314766	0.0370806	0.0642684	-0.139542	0.352962	0.26476	-0.22554	0.0538077	0.254237	-0.256338	-0.0339039	-0.118056	-0.127986	-0.399753	0.411845	0.416262	0.504345	-0.140767	-0.0382496	-0.143061	0.00133051	-0.208046	0.275152	-0.352815	0.0464029	0.381804	-0.503898	-0.441579	-0.125878	-0.205958	-0.475054	-0.0947188	0.00742455	0.226061
TCGA.A8.A06O	0.276642	0.0601413	-0.290929	-0.27602	-0.237686	-0.0696168	0.458944	-0.128154	-0.414059	-0.476681	-0.488025	-0.34535	0.0820852	-0.554911	0.0996599	-0.0155541	-0.178053	-0.224223	0.118584	0.463839	0.297795	0.499274	0.329271	0.205753	-0.0672403	-0.103723	-0.294465	0.107321	-0.453536	-0.142157	0.363805	-0.320871	-0.33193	-0.300582	-0.243985	-0.280954	0.137299	-0.261383	-0.374429	0.00520992	-0.373829	-0.339398	0.0226113	0.381041	-0.165619	-0.432936	0.313527	0.0102533	0.087189
TCGA.A8.A06P	0.0275439	-0.044011	-0.0561748	-0.165596	0.0751385	0.0756892	-0.0318185	0.048556	-0.0232845	-0.0618741	-0.13504	0.0890369	-0.128923	-0.345903	0.186845	0.302564	-0.232686	-0.3076	-0.028973	-0.186132	-0.0760963	-0.20448	0.156416	0.144358	0.0432581	0.437193	0.25656	0.291115	-0.243757	0.126113	0.14306	-0.599089	0.290219	0.308932	0.355895	-0.167624	-0.351425	-0.401486	-0.194006	-0.139336	-0.0536993	0.00311254	-0.0769068	-0.204882	-0.407124	-0.156315	-0.276725	-0.114273	-0.285607
TCGA.A8.A06Q	0.366402	0.339859	-0.217558	-0.0554565	-0.243114	-0.0284163	0.443435	-0.205223	-0.355719	-0.42421	-0.381266	-0.184603	0.0162883	-0.424358	-0.343839	-0.254632	-0.063751	-0.0920753	-0.171264	0.521283	0.461072	0.453824	0.342993	0.12023	-0.217823	-0.232526	-0.239306	0.00864755	-0.215394	-0.116438	-0.377827	-0.548128	-0.37965	-0.48664	-0.417116	-0.0957775	0.361674	0.211665	0.294804	0.0920526	0.0265783	0.149408	0.146399	0.502934	-0.041967	-0.284297	0.235175	0.0128251	0.122186
TCGA.A8.A06R	-0.0131754	-0.0683286	-0.249399	-0.311996	0.188385	-0.274837	-0.218927	-0.264422	-0.283661	-0.372986	-0.434826	-0.161699	-0.17142	-0.327062	0.108282	0.124032	0.0428789	0.0435308	0.0451179	-0.102521	-0.0387698	0.107994	0.330282	-0.218523	-0.0998926	-0.128486	-0.338255	-0.186751	-0.32614	0.277588	-0.00657185	-0.00761911	0.042928	-0.0548307	0.0397886	-0.0656099	-0.224599	-0.196274	-0.143446	-0.0776717	-0.0903964	-0.27343	-0.303059	-0.546178	-0.356847	-0.341481	-0.00294956	-0.113221	-0.0804838
TCGA.A8.A06T	0.194638	0.0976808	-0.393212	-0.174204	-0.167348	-0.204476	0.493916	-0.306123	-0.317997	-0.468521	-0.433123	-0.320443	0.150579	-0.495373	-0.308851	0.0727706	-0.203286	-0.159221	-0.0553586	0.502997	0.353567	0.599735	0.524118	0.0750763	-0.118037	-0.231343	-0.444756	-0.23043	-0.31224	-0.278737	-0.311665	-0.101197	-0.305664	-0.343944	-0.309426	-0.203793	0.41144	-0.258053	-0.370237	0.0808042	-0.105912	-0.300841	0.244335	-0.0397333	-0.226786	-0.482606	0.345807	0.0580319	0.244937
TCGA.A8.A06U	0.284786	0.37184	-0.313563	-0.0567545	-0.0775861	-0.138537	0.543605	-0.123253	-0.206578	-0.495728	-0.467923	-0.280659	0.139911	-0.443334	0.158615	0.136109	0.0056949	-0.254622	-0.00836687	0.466864	0.361107	0.367997	0.463187	0.348627	-0.256367	-0.0896537	0.110697	-0.343318	-0.500661	0.230379	0.162584	-0.0041704	-0.325975	-0.324618	-0.355707	-0.336662	0.391195	-0.136418	-0.355345	-0.0678397	-0.345465	-0.423852	-0.0449427	0.18551	-0.343335	-0.439857	0.274967	0.057641	0.234134
TCGA.A8.A06X	0.0507185	0.560425	-0.464936	-0.103468	-0.0663129	-0.257001	0.316681	-0.135937	-0.219645	-0.423492	-0.376971	-0.301691	0.0533635	-0.0664026	-0.0365295	-0.147127	0.303389	-0.0469875	0.0253551	0.566393	0.55348	0.521627	0.217567	0.230702	-0.0502858	-0.300321	-0.109622	-0.184385	-0.17746	0.298126	-0.0741905	-0.257014	-0.289838	-0.319626	-0.218906	-0.244359	0.383614	0.00514694	-0.203959	0.0830643	0.151513	-0.440596	-0.15594	0.00828604	-0.286865	-0.410312	0.31614	-0.000740472	0.23077
TCGA.A8.A06Y	0.255007	0.203111	-0.440342	-0.294861	-0.174663	0.0768804	0.475135	-0.111966	-0.20121	-0.287105	-0.27484	-0.163404	0.151978	-0.221799	-0.0894161	-0.0366169	0.120478	-0.202212	-0.159313	0.325836	0.190405	0.0794023	0.270914	-0.0218027	-0.209625	-0.15912	-0.291333	-0.00644485	-0.141281	-0.144282	-0.261775	-0.618855	-0.29339	-0.270113	-0.29253	-0.16702	0.135238	-0.426041	-0.00340508	0.0114044	-0.243926	0.280841	-0.0121518	0.307651	0.357221	-0.188223	0.0939733	-0.0331673	-0.0285132
TCGA.A8.A06Z	0.445193	0.262441	-0.0759528	-0.183206	0.145769	-0.077566	0.3376	-0.0108272	-0.127297	-0.27082	-0.061752	0.210869	0.123022	-0.44766	-0.174409	0.0507494	0.140437	0.00853292	0.255571	0.187262	0.052153	0.240278	0.237021	0.201175	0.256465	0.406055	-0.158952	0.231848	0.180319	-0.372705	0.00654396	-0.591523	-0.18231	-0.330239	-0.211852	0.0553433	0.21079	0.0944793	-0.121396	0.0866949	-0.242832	0.0747553	-0.100173	0.518263	-0.0681847	-0.145078	0.355519	-0.0333093	0.0689155
TCGA.A8.A075	0.255823	0.0506107	-0.12657	-0.315671	-0.0371284	-0.114009	-0.0139152	-0.218059	-0.302666	-0.317029	-0.243394	0.121371	0.0690667	-0.222637	-0.00502945	-0.0212268	-0.0761324	-0.35354	-0.0967563	0.110477	0.249372	0.404926	-0.0106345	-0.0766613	-0.181732	-0.0133328	-0.288085	0.123631	-0.302899	0.0243612	0.364636	0.292042	-0.0972272	-0.18795	-0.112222	0.00590615	-0.0451869	-0.357126	-0.0265041	0.195169	-0.107716	-0.0873858	-0.299253	-0.114413	-0.503173	-0.0858787	-0.360994	-0.0555959	-0.109783
TCGA.A8.A076	0.3271	0.122518	0.164717	-0.171071	0.153753	-0.26828	0.302639	-0.332429	-0.442755	-0.408922	-0.433679	-0.392262	0.106455	-0.20207	-0.0410344	0.502201	0.205608	-0.37552	-0.0109107	0.283355	0.159932	0.12708	0.0690171	0.177875	-0.278495	0.0423981	-0.460072	0.110071	-0.335011	0.0880178	0.315901	-0.481757	-0.157087	-0.185729	-0.080514	-0.203544	-0.0156009	-0.346165	-0.0894285	0.0526844	-0.0510885	-0.201308	-0.139708	0.480338	-0.480379	-0.138462	-0.286101	-0.006837	0.110839
TCGA.A8.A079	0.218762	-0.0797652	-0.164695	-0.287679	0.0777831	-0.205087	0.147849	-0.204971	-0.206319	-0.0927695	0.0137703	-0.11392	0.0647626	-0.226274	-0.00139477	-0.280698	-0.208649	-0.408908	-0.0454909	0.0241502	-0.00916551	0.0368705	-0.300189	-0.112447	-0.110624	-0.0273706	0.116306	0.131929	-0.190377	-0.0246396	0.0419445	-0.460026	-0.155148	-0.129986	-0.0796817	-0.025743	-0.154579	0.0317457	0.0414407	-0.0123522	-0.109202	0.0523089	-0.0709178	0.112646	-0.254983	-0.10202	0.0259262	0.0534583	0.148429
TCGA.A8.A07B	-0.162359	-0.221825	0.199013	-0.423718	0.0641273	-0.155285	-0.410241	-0.109819	-0.187574	-0.359985	-0.395215	-0.129568	0.0148908	-0.306889	-0.0648181	-0.00978764	-0.246073	-0.375655	0.0403585	0.0538694	0.30843	0.44352	0.069041	-0.294319	0.142991	-0.200783	0.0907339	-0.248907	-0.0545046	0.0778511	-0.1944	-0.500725	0.139599	0.14972	0.0824611	-0.0114313	-0.00334704	-0.245643	0.0507405	-0.237854	-0.383229	0.0570226	-0.164224	-0.275333	-0.138755	-0.30707	0.0205211	-0.0126528	-0.0308494
TCGA.A8.A07C	0.192469	0.0553208	-0.297718	-0.316021	-0.301847	-0.137416	0.211	-0.231905	-0.297499	-0.50836	-0.458507	-0.350299	-0.195453	-0.0596516	-0.364795	-0.304693	0.192125	-0.383628	-0.34857	0.408626	0.530801	0.268113	0.23266	-0.0294788	-0.297099	-0.421329	-0.248833	-0.109382	-0.328713	0.189103	-0.149776	-0.0396715	-0.0921401	0.0418699	-0.186529	-0.288014	-0.168562	-0.307354	-0.229829	-0.4119	-0.14134	-0.423982	-0.313059	-0.387029	-0.331104	-0.41056	-0.294095	0.0307656	0.0747738
TCGA.A8.A07E	0.196455	-0.181856	0.242688	-0.177477	0.426589	0.0338948	0.0454275	-0.197348	-0.163605	-0.369669	-0.453547	-0.136198	0.0965482	-0.192503	0.456683	0.358771	-0.184391	-0.345573	-0.139423	-0.00112067	0.123133	0.168807	-0.172789	-0.164509	-0.192739	0.234795	0.211159	0.0352189	-0.141933	0.45	-0.324997	-0.154536	0.263714	0.218561	0.344088	-0.35837	-0.385376	-0.378947	0.0381245	-0.199684	-0.253799	0.0339471	-0.387983	-0.465637	0.0360485	-0.147482	-0.486271	0.00810949	-0.140593
TCGA.A8.A07F	0.199877	0.169018	-0.170106	-0.242666	-0.0877231	-0.117376	0.28546	-0.250308	-0.239715	-0.498808	-0.540647	-0.417443	0.057861	-0.276812	-0.0386307	-0.389322	-0.093171	-0.114655	-0.190603	0.384349	0.465033	0.471372	0.209492	0.069266	-0.472994	-0.0960678	-0.179621	-0.251993	-0.57126	-0.0509569	-0.43844	-0.302131	-0.13179	-0.0387574	-0.115424	-0.40301	0.00762659	-0.447324	-0.47282	-0.318471	-0.307517	-0.372138	-0.14255	-0.153341	-0.353071	-0.469995	-0.445593	-0.0838646	-0.0769965
TCGA.A8.A07G	0.221701	0.222048	0.208815	-0.0392589	0.450495	-0.0213997	-0.0558652	-0.1461	-0.11337	-0.103179	-0.103533	0.147989	0.316868	-0.0229073	0.271564	0.328673	-0.195741	-0.289924	-0.0477392	-0.130139	-0.154078	-0.0754305	-0.214257	-0.103092	-0.180819	0.0464441	0.0337887	0.0392341	-0.236236	-0.0010549	-0.242402	-0.268079	0.295156	0.319405	0.328665	-0.150147	-0.356366	-0.096247	0.287907	-0.219443	-0.1302	0.108176	-0.182086	0.13266	0.266956	0.285654	-0.415827	-0.136866	-0.390889
TCGA.A8.A07I	-0.184764	0.0820812	0.0285957	-0.247157	0.141716	-0.349813	-0.255277	-0.286089	-0.254983	-0.434393	-0.360656	-0.0894533	-0.030758	-0.364967	-0.297548	-0.0784179	0.0991942	-0.426595	-0.187852	0.277169	0.109412	0.158488	-0.0598803	-0.0928766	-0.274086	0.0393039	-0.148988	-0.0549772	-0.450599	0.227445	0.353479	-0.120574	0.279935	0.313694	0.257714	-0.363234	-0.369661	-0.450313	-0.398886	-0.252857	-0.260091	-0.357998	-0.279433	0.0404553	-0.266818	-0.345894	-0.573873	-0.240498	-0.298047
TCGA.A8.A07J	0.185969	0.490576	0.105664	0.216379	-0.000375378	0.0457012	0.182249	-0.0542146	0.227658	-0.0260739	-0.409324	-0.165958	0.267278	-0.472261	0.280728	0.394885	-0.132649	-0.0291214	0.106062	-0.140774	-0.193219	0.0342596	0.169818	0.461424	-0.0733652	0.395362	-0.0346323	-0.289126	0.0361654	-0.201463	0.247442	-0.265203	0.288424	0.26975	0.306505	-0.185524	-0.224891	-0.260758	-0.181954	-0.247012	0.0171973	-0.0974493	0.234233	0.0128991	0.440965	-0.162525	-0.266777	-0.0415603	-0.306554
TCGA.A8.A07L	0.322222	0.0465064	0.0447129	-0.259375	0.0955548	-0.0542483	0.243123	-0.163353	-0.438092	-0.428906	-0.444105	-0.458245	0.0187953	-0.279422	0.0899097	-0.0796707	0.121481	-0.41339	-0.03324	0.252008	0.27995	0.444646	-0.135208	-0.157646	-0.0593152	-0.272384	-0.188153	-0.179422	-0.157172	0.0585437	-0.258901	-0.550863	-0.031676	-0.0812159	-0.0210257	-0.290054	-0.253643	-0.312316	-0.363087	-0.338897	-0.0776584	-0.363649	-0.378927	0.00576777	-0.396144	-0.415639	-0.0474631	0.137213	0.283984
TCGA.A8.A07O	0.326996	-0.175411	-0.253809	-0.219237	0.617201	0.0447295	0.0522774	-0.0169672	-0.146383	-0.335209	-0.426436	-0.227087	-0.0568995	0.481282	0.187207	0.0637583	0.0168935	0.0668872	0.0572588	0.575431	0.393448	0.19574	-0.13562	-0.023164	-0.231423	0.240939	-0.225862	-0.025349	-0.204072	0.33009	-0.00713539	-0.188008	-0.22551	-0.217597	-0.234309	0.00651993	0.313661	0.125009	-0.307589	0.0669819	0.266709	-0.163079	-0.0491241	0.0185902	-0.330726	-0.274418	-0.0266387	0.263649	0.416544
TCGA.A8.A07P	0.396578	0.355516	0.122808	0.0161933	-0.0468506	-0.0706289	0.560622	-0.0747802	-0.19496	-0.285276	-0.392832	-0.255565	0.303922	-0.445145	0.175153	0.05044	0.358214	-0.0852653	0.37805	0.397006	0.172908	0.0417742	0.0410901	0.286479	0.188007	0.265278	-0.136826	-0.00594445	0.0628793	0.115407	0.152634	-0.461107	-0.137506	-0.133434	-0.131966	-0.0420185	0.197591	-0.0581111	0.191868	0.19166	-0.0992805	0.226935	0.16344	0.3959	-0.0955395	0.0271733	0.454511	0.164594	0.222527
TCGA.A8.A07R	0.328323	-0.430881	-0.308358	-0.329701	-0.123213	-0.0807921	-0.23847	-0.182458	-0.165422	-0.472655	-0.567896	-0.397104	-0.302714	0.302686	-0.041127	-0.51126	-0.206478	-0.226392	-0.299129	0.551208	0.400897	0.561427	-0.181531	-0.145404	0.165731	-0.271835	-0.176302	-0.220826	-0.195897	0.345497	-0.256152	-0.437068	-0.109007	0.010047	-0.10129	0.250992	0.386867	0.225226	-0.0429148	0.201619	0.293553	-0.306488	-0.331145	-0.0895934	-0.38706	-0.201298	0.334164	0.129205	0.264679
TCGA.A8.A07S	0.472347	0.38419	-0.189269	-0.182002	0.281751	-0.234018	0.461863	-0.169863	-0.135808	-0.364621	-0.336742	-0.114155	0.184421	-0.341572	0.0179128	0.0745764	0.332536	-0.111002	-0.0101835	0.37622	0.081465	0.260974	0.231067	0.155233	0.183902	-0.0412974	0.0784883	-0.21471	-0.254081	-0.140441	0.00977206	-0.509619	0.125809	0.21475	0.145082	-0.205302	0.233485	-0.230476	-0.356864	-0.0139999	-0.108547	-0.438148	-0.227239	-0.239465	-0.200616	-0.44318	0.181556	0.114293	0.18403
[truncated: 5,809 more rows]
[truncated: 137 more columns]

## Sheet: Supplementary Table S4
Supplementary Table S4: TME infiltration characteristics of samples in pan-cancer
[truncated: 6,402 more rows]

## Sheet: Supplementary Table S5
Supplementary Table S5: The correlation of m6A modification regulators and TME infiltration Characteristics.
Immune Cell	ALKBH5	CBLL1	ELAVL1	FMR1	FTO	HNRNPC	IGF2BP1	IGF2BP2	IGF2BP3	METTL14	METTL16	METTL3	RBM15	RBM15B	RBMX	VIRMA	WTAP	YTHDC1	YTHDC2	ZCCHC4
[truncated: 28 more rows]

## Sheet: Supplementary Table S6
Supplementary Table S6: The Univariate Cox regression analysis of 40 differential genes
[truncated: 41 more rows]

## Sheet: Supplementary Table S7
Supplementary Table S7: Functional annotation for m6A phenotype-related genes
[truncated: 91 more rows]

[truncated: 2 more sheets: Supplementary Table S8, Supplementary Table S9]
